# Supplementary material for: Proteome Analysis of Alpine Merino Sheep Skin Reveals New Insights into the Mechanisms Involved in Regulating Wool Fiber Diameter
Source: MDPI journal article supplement (doi:10.3390/ijms242015227), 2023-10-16
Supplement: s1 [file s1]

Table S1A. gradient elution condition

| Time(min)   | Gradient |
|-------------|----------|
| 0-10min     | 2% B     |
| 10-10.01min | 2-5% B   |
| 10.01-37min | 5-20% B  |
| 37-48min    | 20-40% B |
| 48-48.01min | 40-90% B |
| 48.01-58min | 90% B    |
| 58-58.01min | 90-2% B  |
| 58.01-63min | 2% B     |

Table S1B. DDA mass spectrometry conditions

| Items            | Value       |
|------------------|-------------|
| Ion Mobility     | 0.85-1.3    |
| Capillary        | 1.4KV       |
| Mass Range       | 100-1700m/z |
| Dry Temperature  | 180°C       |
| Collision Energy | 20-59eV     |
| Dry Gas          | 3.0L/min    |

Table S1C. DIA mass spectrometry conditions

| Items            | Value       |
|------------------|-------------|
| Ion Mobility     | 0.7-1.3     |
| Capillary        | 1.4KV       |
| Mass Range       | 100-1700m/z |
| Dry Temperature  | 180°C       |
| Collision Energy | 20-59eV     |
| Dry Gas          | 3.0L/min    |
