# Supplementary material for: Proteome Analysis of Alpine Merino Sheep Skin Reveals New Insights into the Mechanisms Involved in Regulating Wool Fiber Diameter
Source: Int J Mol Sci. 2023 Oct 16;24(20):15227. doi: 10.3390/ijms242015227 (PMC10607505; doi:10.3390/ijms242015227)
Supplement: Supplementary file 1 [file ijms-24-15227-s001.zip]

Archive with 7 entries (7 files):
- Supplementary Figure S1.pdf
- Supplementary Table S1.pdf
- Supplementary Table S2.xlsx
- Supplementary Table S3.xlsx
- Supplementary Table S4.xlsx
- Supplementary Table S5.xlsx
- Supplementary Table S6.xlsx
