# Supplementary material for: Proteome Analysis of Alpine Merino Sheep Skin Reveals New Insights into the Mechanisms Involved in Regulating Wool Fiber Diameter
Source: Int J Mol Sci. 2023 Oct 16;24(20):15227. doi: 10.3390/ijms242015227 (PMC10607505; doi:10.3390/ijms242015227)
Supplement: Supplementary file 1 [file ijms-24-15227-s001.zip › Supplementary Table S2.xlsx]

## Sheet: Sheet1
Accession	Gene Name	Description	MW [kDa]	ProteinGroups	Genes	ProteinDescriptions	Qvalue	Cscore	SF6	EF1	EF2	EF3	EF4	EF5	EF6	MF1	MF2	MF3	MF4	MF5	MF6	M1	M2	M3	SF1	SF2	SF3	SF4	SF5	M4	M5	M6	Product	GeneID	Gene_Name	GO_id	GO_term	pathway	pathway_description	K_number	eggNOG_id	eggNOG_abbreviation	eggNOG_description	eggNOG_function_classification	PFAM_Family	PFAM_Name	PFAM_description	InterPro_id	InterPro_ENTRY_TYPE
A0A023WBG4	MX2	Myxovirus resistance 2	81.6768	A0A023WBG4;A0A836D8B0;Q5I2P5;W5PKK1	MX2;JEQ12_001839;MX2;MX2	Myxovirus resistance 2;Interferon-induced GTP-binding protein Mx2;Interferon-induced GTP-binding protein Mx2;MX dynamin like GTPase 2	0.00618525	26.8595		-0.0523983	-0.674659	-0.673419	-1.15098	-1.33999	-1.15275	-0.909791	-0.575744	-0.0316741	-0.287421	-0.743482	-0.578026	-0.0714994	-0.178803	-1.7822	-0.82776		-1.04341			-0.743908	-0.76802	-1.1381	Myxovirus resistance 2	780441	MX2	GO:0005525,GO:0003924	GTP binding|GTPase activity	oas03250,oas05160,oas05171,oas05164,oas05162,oas05165	Viral life cycle - HIV-1|Hepatitis C|Coronavirus disease - COVID-19|Influenza A|Measles|Human papillomavirus infection	K14754					PF01031,PF00350,PF02212	Dynamin_M|Dynamin_N|GED	Dynamin central region|Dynamin family|Dynamin GTPase effector domain	IPR022812,IPR001401,IPR019762,IPR045063,IPR000375,IPR030381,IPR003130,IPR020850,IPR027417	Family|Domain|Conserved_site|Domain|Domain|Domain|Domain|Domain|Homologous_superfamily
A0A075T9L7	DPP4	Dipeptidyl peptidase 4	88.4557	A0A075T9L7;A0A6P3E8N0;W5P906	DPP4;JEQ12_009575;DPP4	Dipeptidyl peptidase 4	3.47468e-35	53.053	1.74431	1.41242	1.77585	1.54648	1.94103	1.63394	1.69085	1.72103	1.67932	1.90066	1.91953	1.91537	1.70459	1.98415	1.7953	1.77923	1.73159	1.82164	1.78742	1.78462	1.97381	1.93994	1.61352	1.93564	Dipeptidyl peptidase 4	100170324	DPP4	GO:0007155,GO:0006508,GO:0070161,GO:0016324,GO:0031258,GO:0045121,GO:0008239,GO:0004252	cell adhesion|proteolysis|anchoring junction|apical plasma membrane|lamellipodium membrane|membrane raft|dipeptidyl-peptidase activity|serine-type endopeptidase activity	oas04974	Protein digestion and absorption	K01278					PF00930,PF18811,PF00326	DPPIV_N|DPPIV_rep|Peptidase_S9	Dipeptidyl peptidase IV (DPP IV) N-terminal region|Dipeptidyl peptidase IV (DPP IV) low complexity region|Prolyl oligopeptidase family	IPR029058,IPR040522,IPR002471,IPR001375,IPR002469	Homologous_superfamily|Domain|Active_site|Domain|Domain
A0A077JCU9	Cath2	Cathelicidin (Fragment)	19.8418	A0A077JCU9;A0A835ZMZ0;P79362;W5NV73;W5NV75	Cath2;JEQ12_008506;CATHL2;BAC5;BAC5	Cathelicidin (Fragment);Uncharacterized protein;Cathelicidin-2;5 kDa bactinecin precursor;5 kDa bactinecin precursor	1.09164e-27	50.6215	1.83527	0.446538	-0.740422	-0.0016491	-0.468409	-1.92428	0.777114	0.507747	-2.62417	-0.0870163	-0.771371	0.711958	1.39993	0.195399	0.20418	0.484506	-0.839135	-0.524377	1.00425	0.421021	-1.28449	0.108328	1.67026	0.200728	Cathelicidin (Fragment)	443356	Cath2	GO:0042742,GO:0005576	defense response to bacterium|extracellular region	oas04613,oas04621,oas04970,oas05150,oas05152	Neutrophil extracellular trap formation|NOD-like receptor signaling pathway|Salivary secretion|Staphylococcus aureus infection|Tuberculosis	K13916					PF00666	Cathelicidins	Cathelicidin	IPR001894,IPR018216,IPR046350	Family|Conserved_site|Homologous_superfamily
A0A097GTW7	PGRMC1	Progesterone receptor membrane component 1	21.6321	A0A097GTW7;A0A6P9FRJ1	PGRMC1;JEQ12_020461	Progesterone receptor membrane component 1;Uncharacterized protein	2.39499e-22	48.7709	4.3208	4.3286	4.12333	4.34587	4.33272	4.78285	4.15461	4.07813	4.43359	4.19578	4.28397	4.14519	4.24237	4.31212	4.33148	4.39973	4.0705	3.99388	4.01869	4.17517	4.28889	4.27117	4.16713	4.24375	Progesterone receptor membrane component 1	101106311	PGRMC1	GO:0006783,GO:0005783,GO:0005741,GO:0020037,GO:0042803	heme biosynthetic process|endoplasmic reticulum|mitochondrial outer membrane|heme binding|protein homodimerization activity	oas04080	Neuroactive ligand-receptor interaction	K17278					PF00173	Cyt-b5	Cytochrome b5-like Heme/Steroid binding domain	IPR001199,IPR036400	Domain|Homologous_superfamily
A0A0A7AK60	CYTB	Cytochrome b	42.8932	A0A0A7AK60;A0A0A7AKD4;A0A0A7AKZ2;A0A0A7AMA6;A0A0D6DTP8;A0A0D6DTQ0;A0A0D6DTQ2;A0A0D6DTQ3;A0A0D6DTQ4;A0A0K0QNK4;A0A0K0QNL3;A0A0K0QPK2;A0A0R7II93;A0A0R7IID8;A0A0R7IIQ3;A0A0R7IIQ6;A0A0R7IIS8;A0A0R7IIU9;A0A0R7IIZ6;A0A0R7IJ08;A0A0R7IJ12;A0A0R7IJB2;A0A0R7IJC4;A0A0R7IJD2;A0A0R7IJE0;A0A0R7IJE9;A0A0R7IJG7;A0A0R7IJN8;A0A0R7IJR2;A0A0R7ILQ7;A0A0S1VWN5;A0A0U2GT61;A0A0U2GTC0;A0A0U2GVK8;A0A166NWB5;A0A166NWL4;A0A…	CYTB;CYTB;CYTB;CYTB;Cyt-b;Cyt-b;Cyt-b;Cyt-b;Cyt-b;;;;CytB;CytB;CytB;CytB;CytB;CytB;CytB;CytB;CytB;CytB;CytB;CytB;CytB;CytB;CytB;CytB;CytB;CytB;cyt b;cytb;cytb;cytb;cytB;cytB;;CYB;CYB;Cytb;Cytb;Cytb;Cytb;Cytb;;;CYTB;CYTB;cytb;cytb;cytb;cytb;cytb;cytb;cytb;cytb;cytb;cytb;cytb;cytb;cytb;cytb;cytb;cytb;cytb;cytb;cytb;cytb;Cytb;CYTB;CYTB;Cytb;CYTB;CYTB;CYTB;CYTB;CYTB;CYTB;Cytb;Cytb;Cytb;Cytb;Cytb;Cytb…	Cytochrome b;Cytochrome b;Cytochrome b;Cytochrome b;Cytochrome b (Fragment);Cytochrome b (Fragment);Cytochrome b (Fragment);Cytochrome b (Fragment);Cytochrome b (Fragment);Cytochrome b (Fragment);Cytochrome b (Fragment);Cytochrome b (Fragment);Cytochrome b;Cytochrome b;Cytochrome b;Cytochrome b;Cytochrome b;Cytochrome b;Cytochrome b;Cytochrome b;Cytochrome b;Cytochrome b;Cytochrome b;Cytochrome b…	4.83903e-09	43.2938	-0.977786	-0.701451	-0.349961	0.246813	-0.373301	-1.94375	-0.0608458	-0.898295	-1.47717	-0.917226	-0.897613	-0.449611	0.526622				0.421144	-0.778268	0.148788	-0.835065	-0.172377	-2.09111			Cytochrome b	808260	CYTB	GO:0022904,GO:0005743,GO:0045275,GO:0046872,GO:0008121	respiratory electron transport chain|mitochondrial inner membrane|respiratory chain complex III|metal ion binding|ubiquinol-cytochrome-c reductase activity	oas00190,oas04260,oas04714,oas05208,oas05010,oas05012,oas05014,oas05016,oas05020,oas05022,oas05415,oas04932	Oxidative phosphorylation|Cardiac muscle contraction|Thermogenesis|Chemical carcinogenesis - reactive oxygen species|Alzheimer disease|Parkinson disease|Amyotrophic lateral sclerosis|Huntington disease|Prion disease|Pathways of neurodegeneration - multiple diseases|Diabetic cardiomyopathy|Non-alcoholic fatty liver disease	K00412					PF00032,PF00033	Cytochrom_B_C|Cytochrome_B	Cytochrome b(C-terminal)/b6/petD|Cytochrome b/b6/petB	IPR005798,IPR036150,IPR005797,IPR027387,IPR030689,IPR016174	Domain|Homologous_superfamily|Domain|Homologous_superfamily|Family|Homologous_superfamily
A0A0A7AKG8	COX3	Cytochrome c oxidase subunit 3	29.8015	A0A0A7AKG8;A0A0A7AKL1;A0A0A7ALD8;A0A0A7ALW5;A0A0A7ALX6;A0A0F6PY66;A0A141CNL3;A0A2I7ZDS0;A0A2I7ZDS6;A0A2I7ZDV6;A0A2I7ZDY5;A0A2I7ZE23;A0A2I7ZE81;A0A2I7ZEG6;A0A343TP88;A0A7G9UGL2;B0EXQ9;B0EXU8;E0A2E7;E0A2H3;H1ZZ70;K4P480;O21619;Q5MA71;U3M2V6;U3M4C5	COX3;COX3;COX3;COX3;COX3;COX3;COX3;COX3;COX3;COX3;COX3;COX3;COX3;COX3;COX3;COX3;CO3;CO3;COX3;COX3;COIII;CO3;MT-CO3;COX3;COX3;COX3	Cytochrome c oxidase subunit 3;Cytochrome c oxidase subunit 3;Cytochrome c oxidase subunit 3;Cytochrome c oxidase subunit 3;Cytochrome c oxidase subunit 3;Cytochrome c oxidase subunit 3;Cytochrome c oxidase subunit 3;Cytochrome c oxidase subunit 3 (Fragment);Cytochrome c oxidase subunit 3 (Fragment);Cytochrome c oxidase subunit 3 (Fragment);Cytochrome c oxidase subunit 3 (Fragment);Cytochrome c o…	0.000144487	39.0015	-2.09287	-2.94186	-1.13014	-1.24337	-1.93448	-0.700443	-1.4177		-1.72287				-1.31863	-2.0531	-2.48173	-2.22373	-2.75419	-1.93338	-1.44213	-2.74174	-2.67689	-2.8036	-1.0521	-2.38201	Cytochrome c oxidase subunit 3	808261	COX3	GO:0019646,GO:0016020,GO:0005739,GO:0004129	aerobic electron transport chain|membrane|mitochondrion|cytochrome-c oxidase activity	oas00190,oas04260,oas04714,oas05208,oas05010,oas05012,oas05014,oas05016,oas05020,oas05022,oas05415,oas04932	Oxidative phosphorylation|Cardiac muscle contraction|Thermogenesis|Chemical carcinogenesis - reactive oxygen species|Alzheimer disease|Parkinson disease|Amyotrophic lateral sclerosis|Huntington disease|Prion disease|Pathways of neurodegeneration - multiple diseases|Diabetic cardiomyopathy|Non-alcoholic fatty liver disease	K02262					PF00510	COX3	Cytochrome c oxidase subunit III	IPR024791,IPR033945,IPR000298,IPR035973,IPR013833	Family|Domain|Domain|Homologous_superfamily|Homologous_superfamily
A0A0A7AKJ5	ND5	NADH-ubiquinone oxidoreductase chain 5	68.4115	A0A0A7AKJ5;A0A0A7AKK4;A0A0A7ALD0;A0A0A7AM63;A0A0E3JPI4;A0A0U1V7B1;A0A141CNJ1;A0A141CNK3;A0A1S5QIM7;A0A384SL63;A0A384SLG0;A0A384SMF0;A0A384SMX9;A0A384T2A1;A0A384TGQ9;A0A6B9R4D1;A0A7G9UC57;A0A7G9UC96;A0A7G9UCN9;A0A7G9UDK1;A0A7G9UDV4;A0A7G9UE32;A0A7G9UEC3;A0A7G9UEH5;A0A7G9UES9;A0A7G9UEW8;A0A7G9UH48;A0A7G9UH87;A0A7G9UHU5;A0A898CUS3;B0EXR3;E0A299;E0A2B2;E0A2C5;E0A2F1;E0A2G4;E0A2H7;O78756;Q5MA67;U3M213…	ND5;ND5;ND5;ND5;ND5;ND5;ND5;ND5;ND5;ND5;ND5;ND5;ND5;ND5;ND5;ND5;ND5;ND5;ND5;ND5;ND5;ND5;ND5;ND5;ND5;ND5;ND5;ND5;ND5;ND5;ND5;ND5;ND5;ND5;ND5;ND5;ND5;MT-ND5;ND5;ND5;ND5	NADH-ubiquinone oxidoreductase chain 5	1.09191e-17	46.9945	0.696694	0.0681851	1.35091	1.24074	1.22233	0.856749	1.3741	0.468158	0.923318	1.22085	0.307703	0.653987	1.64241	0.35038	0.751509	1.74059	0.89423	1.19229	1.48856	0.728315	0.540583	0.980998	1.59674	0.964484	NADH-ubiquinone oxidoreductase chain 5	808258	ND5	GO:0042773,GO:0005743,GO:0008137	ATP synthesis coupled electron transport|mitochondrial inner membrane|NADH dehydrogenase (ubiquinone) activity	oas00190,oas04723,oas04714,oas05208,oas05010,oas05012,oas05014,oas05016,oas05020,oas05022,oas05415	Oxidative phosphorylation|Retrograde endocannabinoid signaling|Thermogenesis|Chemical carcinogenesis - reactive oxygen species|Alzheimer disease|Parkinson disease|Amyotrophic lateral sclerosis|Huntington disease|Prion disease|Pathways of neurodegeneration - multiple diseases|Diabetic cardiomyopathy	K03883					PF06455,PF00361,PF00662	NADH5_C|Proton_antipo_M|Proton_antipo_N	NADH dehydrogenase subunit 5 C-terminus|Proton-conducting membrane transporter|NADH-Ubiquinone oxidoreductase (complex I), chain 5 N-terminus	IPR010934,IPR018393,IPR001750,IPR003945,IPR001516	Domain|Family|Domain|Family|Domain
A0A0A7AKQ7	ATP6	ATP synthase subunit a	24.815	A0A0A7AKQ7;A0A0A7AL45;A0A0A7ALG0;A0A0A7AM09;A0A0A7AM71;A0A0E3M1Y2;A0A0F6PZ70;A0A0P0JU21;A0A141CNJ9;A0A2I7ZD01;A0A2I7ZDD0;A0A2I7ZDE7;A0A2I7ZDG1;A0A2I7ZDG7;A0A2I7ZDI3;A0A2I7ZDM2;A0A2I7ZDP8;A0A455J5R7;A0A6B9R468;A0A7G9UC65;A0A7G9UCT6;A0A7G9UE01;A0A7G9UE14;A0A7G9UEF7;A0A7G9UEK9;A0A7G9UFB9;B0EXQ8;E0A255;E0A294;E0A2A7;E0A2H2;O78752;Q5MA72;U3M239;U3M2E9;U3M455;W8EMH0	ATP6;ATP6;ATP6;ATP6;ATP6;ATP6;ATP6;ATP6;ATP6;ATP6;ATP6;ATP6;ATP6;ATP6;ATP6;ATP6;ATP6;ATP6;ATP6;ATP6;ATP6;ATP6;ATP6;ATP6;ATP6;ATP6;ATP6;ATP6;ATP6;ATP6;ATP6;MT-ATP6;ATP6;ATP6;ATP6;ATP6;ATP6	ATP synthase subunit a;ATP synthase subunit a;ATP synthase subunit a;ATP synthase subunit a;ATP synthase subunit a;ATP synthase subunit a;ATP synthase subunit a;ATP synthase subunit a (Fragment);ATP synthase subunit a;ATP synthase subunit a (Fragment);ATP synthase subunit a (Fragment);ATP synthase subunit a (Fragment);ATP synthase subunit a (Fragment);ATP synthase subunit a (Fragment);ATP synthas…	2.05365e-16	46.4625	0.862983	0.93363	0.917966	0.717181	0.921182	0.83953	0.824599	0.862074	1.06944	0.697846	0.643611	0.759331	0.426942	0.700121	0.315337	1.02575	0.681398	0.585294	0.576395	0.554553	0.844674	0.445381	0.903551	0.83616	ATP synthase subunit a	808254	ATP6	GO:0015986,GO:0005743,GO:0045263,GO:0015078	proton motive force-driven ATP synthesis|mitochondrial inner membrane|proton-transporting ATP synthase complex, coupling factor F(o)|proton transmembrane transporter activity	oas00190,oas04714,oas05208,oas05010,oas05012,oas05014,oas05016,oas05020,oas05022,oas05415	Oxidative phosphorylation|Thermogenesis|Chemical carcinogenesis - reactive oxygen species|Alzheimer disease|Parkinson disease|Amyotrophic lateral sclerosis|Huntington disease|Prion disease|Pathways of neurodegeneration - multiple diseases|Diabetic cardiomyopathy	K02126					PF00119	ATP-synt_A	ATP synthase A chain	IPR000568,IPR023011,IPR045083,IPR035908	Family|Active_site|Family|Homologous_superfamily
A0A0A7ALA0	ND2	NADH-ubiquinone oxidoreductase chain 2	39.0979	A0A0A7ALA0;A0A0A7ALY9;A0A384TGJ0;A0A455JD56;A0A7G9UCF2;A0A7G9UFS1;A0A7G9UG77;A0A7G9UGU8;A0A7G9UHG9;E0A290;E0A2G8;O78748;Q5MA76;U3M4Z4	ND2;ND2;ND2;ND2;ND2;ND2;ND2;ND2;ND2;ND2;ND2;MT-ND2;ND2;ND2	NADH-ubiquinone oxidoreductase chain 2	0.000815642	36.3883	1.17564	1.73642	1.77854	1.80831	1.90776	1.6823	1.95512	1.46236	1.9984	1.68489	1.49453	1.53135	1.55454	1.59	1.85809	1.69331	1.70708	1.65798	1.43524	1.51567	1.85684	1.52429	1.56763	1.83319	NADH-ubiquinone oxidoreductase chain 2	808250	ND2	GO:0006120,GO:0005743,GO:0070469,GO:0008137	mitochondrial electron transport, NADH to ubiquinone|mitochondrial inner membrane|respirasome|NADH dehydrogenase (ubiquinone) activity	oas00190,oas04723,oas04714,oas05208,oas05010,oas05012,oas05014,oas05016,oas05020,oas05022,oas05415	Oxidative phosphorylation|Retrograde endocannabinoid signaling|Thermogenesis|Chemical carcinogenesis - reactive oxygen species|Alzheimer disease|Parkinson disease|Amyotrophic lateral sclerosis|Huntington disease|Prion disease|Pathways of neurodegeneration - multiple diseases|Diabetic cardiomyopathy	K03879					PF06444,PF00361	NADH_dehy_S2_C|Proton_antipo_M	NADH dehydrogenase subunit 2 C-terminus|Proton-conducting membrane transporter	IPR010933,IPR003917,IPR001750	Domain|Family|Domain
A0A0A7ALB7	COX1	Cytochrome c oxidase subunit 1	57.0283	A0A0A7ALB7;A0A141CNI3;A0A141CNJ6;A0A2I7ZB01;A0A2I7ZB77;A0A2I7ZBA6;A0A2I7ZBA7;A0A2I7ZBJ5;A0A2I7ZBJ7;A0A2I7ZBK5;A0A455J8R8;A0A7G9UGX5;B0EXU4;E0A2B7;E0A2G9;O78749;Q5MA75;U3M4B5	COX1;COX1;COX1;COX1;COX1;COX1;COX1;COX1;COX1;COX1;COX1;COX1;CO1;COX1;COX1;MT-CO1;COX1;COX1	Cytochrome c oxidase subunit 1	4.15685e-05	40.0948	2.29185	2.50464	2.82166	2.83628	3.07295	2.52868	2.95468	2.89063	2.89374	2.73657	2.69501	2.76367	2.77058	2.5798	2.98713	3.24303	2.91228	2.78111	3.00299	2.73154	2.79656	2.94505	2.93521	2.7512	Cytochrome c oxidase subunit 1	808251	COX1	GO:0006119,GO:0005743,GO:0045277,GO:0004129,GO:0020037,GO:0046872	oxidative phosphorylation|mitochondrial inner membrane|respiratory chain complex IV|cytochrome-c oxidase activity|heme binding|metal ion binding	oas00190,oas04260,oas04714,oas05208,oas05010,oas05012,oas05014,oas05016,oas05020,oas05022,oas05415,oas04932	Oxidative phosphorylation|Cardiac muscle contraction|Thermogenesis|Chemical carcinogenesis - reactive oxygen species|Alzheimer disease|Parkinson disease|Amyotrophic lateral sclerosis|Huntington disease|Prion disease|Pathways of neurodegeneration - multiple diseases|Diabetic cardiomyopathy|Non-alcoholic fatty liver disease	K02256					PF00115	COX1	Cytochrome C and Quinol oxidase polypeptide I	IPR023616,IPR036927,IPR000883,IPR023615,IPR033944	Domain|Homologous_superfamily|Family|Binding_site|Domain
A0A0A7ALG2	ND4	NADH-ubiquinone oxidoreductase chain 4	52.0261	A0A0A7ALG2;A0A384SM77;A0A455J5R6;A0A7G9UDG1;A0A7G9UEQ2;A0A7G9UF06;A0A7G9UFB0;E0A2C4;E0A2H6;O78755;Q5MA68;W8EGD2	ND4;ND4;ND4;ND4;ND4;ND4;ND4;ND4;ND4;MT-ND4;ND4;ND4	NADH-ubiquinone oxidoreductase chain 4	1.22424e-11	44.3246	0.287894	-0.362673	0.597411	0.667006	0.682089	0.570752	0.843734	-0.315253	0.165832	1.02533	-0.445162	-0.131962	0.805615	-0.0840838	0.534709	1.52867	0.535127	0.111345	0.1665	-0.231251	-0.920454	-0.46828	0.937017	0.225974	NADH-ubiquinone oxidoreductase chain 4	808257	ND4	GO:0042773,GO:0005743,GO:0070469,GO:0008137	ATP synthesis coupled electron transport|mitochondrial inner membrane|respirasome|NADH dehydrogenase (ubiquinone) activity	oas00190,oas04723,oas04714,oas05208,oas05010,oas05012,oas05014,oas05016,oas05020,oas05022,oas05415	Oxidative phosphorylation|Retrograde endocannabinoid signaling|Thermogenesis|Chemical carcinogenesis - reactive oxygen species|Alzheimer disease|Parkinson disease|Amyotrophic lateral sclerosis|Huntington disease|Prion disease|Pathways of neurodegeneration - multiple diseases|Diabetic cardiomyopathy	K03881					PF01059,PF00361	Oxidored_q5_N|Proton_antipo_M	NADH-ubiquinone oxidoreductase chain 4, amino terminus|Proton-conducting membrane transporter	IPR000260,IPR010227,IPR003918,IPR001750	Domain|Family|Family|Domain
A0A0A7ALI0	ND6	NADH-ubiquinone oxidoreductase chain 6	19.0306	A0A0A7ALI0;A0A0E3GL06;A0A1S5QIM5;A0A384T0H2;A0A455JD68;A0A7G9UCQ3;A0A7G9UFY3;A0A7G9UHC7;A0A7G9UHH9;B0EXR4;B0EXS7;E0A2A0;E0A2C6;E0A2H8;O78757;Q5MA66;U3M264	ND6;ND6;ND6;ND6;ND6;ND6;ND6;ND6;ND6;ND6;ND6;ND6;ND6;ND6;MT-ND6;ND6;ND6	NADH-ubiquinone oxidoreductase chain 6	0.00621799	26.8347	-2.0016	-1.99992	-1.92567	-1.29219	-1.31909	-1.82098	-0.901703	-2.37616	-1.23386	-1.33198	-1.50822	-2.39739	-2.40163	-1.88612	-1.88963	-1.53723	-1.40551	-1.56457	-1.92966	-1.0305	-1.05917	-1.27726	-0.884821	-1.47734	NADH-ubiquinone oxidoreductase chain 6	808259	ND6	GO:0031966,GO:0070469,GO:0008137	mitochondrial membrane|respirasome|NADH dehydrogenase (ubiquinone) activity	oas00190,oas04723,oas04714,oas05208,oas05010,oas05012,oas05014,oas05016,oas05020,oas05022,oas05415	Oxidative phosphorylation|Retrograde endocannabinoid signaling|Thermogenesis|Chemical carcinogenesis - reactive oxygen species|Alzheimer disease|Parkinson disease|Amyotrophic lateral sclerosis|Huntington disease|Prion disease|Pathways of neurodegeneration - multiple diseases|Diabetic cardiomyopathy	K03884					PF00499	Oxidored_q3	NADH-ubiquinone/plastoquinone oxidoreductase chain 6	IPR001457,IPR042106	Family|Homologous_superfamily
A0A0E3JG63	ND1	NADH-ubiquinone oxidoreductase chain 1	35.8672	A0A0E3JG63;A0A384SM05;A0A384TFN3;A0A6B9R4B9;A0A7G9UEP3;A0A7G9UFY5;E0A2A2;E0A2G7;O78747;Q074K3;Q5MA77;U3M525	ND1;ND1;ND1;ND1;ND1;ND1;ND1;ND1;MT-ND1;ND1;ND1;ND1	NADH-ubiquinone oxidoreductase chain 1	3.55378e-09	43.3513	-0.177666	0.101485	0.0972788	-0.0126078	0.0240461	-0.421966	0.348285	0.181787	-0.296217	0.496416	-0.130591	-0.00175949	0.0352249	-0.417285	-0.108996	0.345278	0.148855	0.212379	0.0920867	-0.394969	0.0150855	-0.506275	0.0897923	-0.0362294	NADH-ubiquinone oxidoreductase chain 1	808249	ND1	GO:0005743,GO:0070469,GO:0008137	mitochondrial inner membrane|respirasome|NADH dehydrogenase (ubiquinone) activity	oas00190,oas04723,oas04714,oas05208,oas05010,oas05012,oas05014,oas05016,oas05020,oas05022,oas05415	Oxidative phosphorylation|Retrograde endocannabinoid signaling|Thermogenesis|Chemical carcinogenesis - reactive oxygen species|Alzheimer disease|Parkinson disease|Amyotrophic lateral sclerosis|Huntington disease|Prion disease|Pathways of neurodegeneration - multiple diseases|Diabetic cardiomyopathy	K03878					PF00146	NADHdh	NADH dehydrogenase	IPR001694,IPR018086	Family|Conserved_site
A0A0F6YFJ0		Beta-C globin	15.7501	A0A0F6YFJ0;P68056;P68057	;HBBC;HBBC	Beta-C globin;Hemoglobin subunit beta-C;Hemoglobin subunit beta-C	0.000266655	38.3246	8.36746	3.59232	5.15176	5.16139	5.06914	3.47513	3.4317	3.3481	4.32139	4.29535	2.18784	5.12606	5.46891	5.89374	2.85961	4.18802	3.93003	5.33471	6.58772	4.49489	3.09406	4.50574	4.59036	2.48348	Beta-C globin	100134870		GO:0005833,GO:0020037,GO:0046872,GO:0019825,GO:0005344	hemoglobin complex|heme binding|metal ion binding|oxygen binding|oxygen carrier activity	oas05144,oas05143	Malaria|African trypanosomiasis	K13823					PF00042	Globin	Globin	IPR000971,IPR009050,IPR012292,IPR002337	Domain|Homologous_superfamily|Homologous_superfamily|Family
A0A0F7YC43	RORA	Retinoic acid related-orphan receptor alpha splice variant 5	58.1283	A0A0F7YC43;A0A0F7YGS5;A0A0F7YLU1;A0A836AE14;W5QI24	RORA;RORA;RORA;JEQ12_018204;	Retinoic acid related-orphan receptor alpha splice variant 5;Retinoic acid related-orphan receptor alpha splice variant 3;Retinoic acid related-orphan receptor alpha splice variant 1;Nuclear receptor ROR-alpha;RAR related orphan receptor A	0.000500735	37.3808	-2.17638	-3.74972	-3.67548	-3.65683	-3.69732	-2.195	-2.35517	-2.10337	-1.88994	-1.48511	-1.93701	-2.33412	-1.66015	-2.19512	-1.43072	-1.35008	-2.09614	-1.58901	-1.74414	-1.99119	-1.738	-1.86595	-1.43377	-2.23361	Retinoic acid related-orphan receptor alpha splice variant 5	101102986	RORA	GO:0005634,GO:0004879,GO:0043565,GO:0008270	nucleus|nuclear receptor activity|sequence-specific DNA binding|zinc ion binding	oas04659,oas04710,oas05321,oas05017	Th17 cell differentiation|Circadian rhythm|Inflammatory bowel disease|Spinocerebellar ataxia	K08532					PF00104,PF00105	Hormone_recep|zf-C4	Ligand-binding domain of nuclear hormone receptor|Zinc finger, C4 type (two domains)	IPR035500,IPR044101,IPR000536,IPR001723,IPR003079,IPR001628,IPR013088	Homologous_superfamily|Domain|Domain|Family|Family|Domain|Homologous_superfamily
A0A0F7YGS2	GATA3	GATA3 binding protein splice variant 1	47.8068	A0A0F7YGS2;A0A0F7YJF3;A0A836A243;F8WQV3	GATA3;GATA3;JEQ12_004116;GATA3	GATA3 binding protein splice variant 1;GATA3 binding protein;GATA-type domain-containing protein;Transcription factor GATA3	5.96231e-30	51.3739	-1.48622	-1.06399	-1.29951	-1.1268	-1.29981	-1.28252	-1.64597	-1.89745	-1.2047	-1.26939	-1.25719	-1.25775	-0.942767	-1.45618	-1.30527	-1.50987	-1.0218	-1.29342	-1.24342	-1.81644	-1.24632	-1.99014	-1.6351	-1.7858	GATA3 binding protein splice variant 1	780483	GATA3	GO:0048856,GO:0005634,GO:0000981,GO:0043565,GO:0008270	anatomical structure development|nucleus|DNA-binding transcription factor activity, RNA polymerase II-specific|sequence-specific DNA binding|zinc ion binding	oas04658,oas04659,oas04928,oas05321	Th1 and Th2 cell differentiation|Th17 cell differentiation|Parathyroid hormone synthesis, secretion and action|Inflammatory bowel disease	K17895					PF00320	GATA	GATA zinc finger	IPR016374,IPR039355,IPR000679,IPR013088	Family|Family|Domain|Homologous_superfamily
A0A0H3V7A0	MYL1b	Myosin light chain 1 transcript variant 2	20.9058	A0A0H3V7A0;A0A6P3EA17;W5QD16	MYL1b;JEQ12_009806;MYL1	Myosin light chain 1 transcript variant 2;EF-hand domain-containing protein;Myosin light chain 1	9.7775e-25	49.6144	-0.452956	0.428654	-0.57136	4.67871	2.29815	2.35685	0.470495	-0.227694	0.995188	-1.13276	1.79746	4.31344	0.477665	-0.067996	0.132187	0.850408	-0.166619	0.250094	-1.25533	-0.539024	0.803698	2.61962	0.0350548	1.16356	Myosin light chain 1 transcript variant 2	101101869	MYL1b	GO:0006936,GO:0030016,GO:0005509,GO:0008307	muscle contraction|myofibril|calcium ion binding|structural constituent of muscle	oas04814	Motor proteins	K05738					PF13405	EF-hand_6	EF-hand domain	IPR011992,IPR002048	Homologous_superfamily|Domain
A0A0H5FU01	Ovar-I	MHC class I antigen (Fragment)	17.8888	A0A0H5FU01	Ovar-I	MHC class I antigen (Fragment)	2.13312e-15	46.0196		-1.16888	-0.956327	1.03164	-1.09968	-0.562563	-0.51611	-2.53256	-3.45302	-2.50054	-2.48093	-0.603784	-1.87603	-2.42871	-2.43221	-2.73051	-2.37766					-2.28589	-0.380319	-2.3325	MHC class I antigen (Fragment)	100171394	Ovar-I			oas04514,oas04144,oas04145,oas04218,oas04650,oas04612,oas05203,oas05166,oas05170,oas05168,oas05163,oas05167,oas05169,oas05165,oas05320,oas05330,oas05332,oas05416,oas04940	Cell adhesion molecules|Endocytosis|Phagosome|Cellular senescence|Natural killer cell mediated cytotoxicity|Antigen processing and presentation|Viral carcinogenesis|Human T-cell leukemia virus 1 infection|Human immunodeficiency virus 1 infection|Herpes simplex virus 1 infection|Human cytomegalovirus infection|Kaposi sarcoma-associated herpesvirus infection|Epstein-Barr virus infection|Human papil…	K06751					PF00129	MHC_I	Class I Histocompatibility antigen, domains alpha 1 and 2	IPR011161,IPR037055,IPR011162,IPR001039	Domain|Homologous_superfamily|Homologous_superfamily|Domain
A0A0K0K682		Appetite-regulating hormone (Fragment)	10.1433	A0A0K0K682;A0A2P1BXW0;A0A835ZQ74;Q30DT1;Q863C6;Q863L0;W5PPI6	;;JEQ12_008555;GHRL;;;	Appetite-regulating hormone (Fragment);Ghrelin (Fragment);Appetite-regulating hormone;Appetite-regulating hormone (Fragment);Appetite-regulating hormone (Fragment);Appetite-regulating hormone;Appetite-regulating hormone	7.28201e-17	46.6535	-0.961326	-0.798534	-0.973577	-0.794189	-2.0429	-1.04489	-1.29949	-1.31709	-3.3506	-1.35562	-2.33115	-1.16581	-1.11733	-1.85183	-0.295648	-2.33314	-1.44798	-1.26784	-0.976504	-2.06162	-1.8699	-2.01363	-2.25845	-1.42003	Appetite-regulating hormone (Fragment)	442996		GO:0001937,GO:0032024,GO:0032095,GO:0005615,GO:0031768,GO:0016608	negative regulation of endothelial cell proliferation|positive regulation of insulin secretion|regulation of response to food|extracellular space|ghrelin receptor binding|growth hormone-releasing hormone activity	oas04024,oas04080,oas04935	cAMP signaling pathway|Neuroactive ligand-receptor interaction|Growth hormone synthesis, secretion and action	K05254					PF04643,PF04644	Motilin_assoc|Motilin_ghrelin	Motilin/ghrelin-associated peptide|Motilin/ghrelin	IPR006737,IPR006738,IPR005441	Domain|Domain|Family
A0A0N9LYD4	BFAR	Bifunctional apoptosis regulator isoform X2	45.987	A0A0N9LYD4;A0A6P7DF66;A0A6P7DF84	BFAR;JEQ12_012358;BFAR	Bifunctional apoptosis regulator isoform X2;Bifunctional apoptosis regulator;Bifunctional apoptosis regulator	0.00472937	28.1142		-2.97795	-3.14229	-2.51064	-1.99499	-3.0446	-2.92265		-2.23403				-1.98242			-2.60084					-2.04878	-1.85511			Bifunctional apoptosis regulator isoform X2	101112619	BFAR										PF00536,PF15227	SAM_1|zf-C3HC4_4	SAM domain (Sterile alpha motif)|zinc finger of C3HC4-type, RING	IPR001660,IPR013761,IPR001841,IPR013083,IPR017907	Domain|Homologous_superfamily|Domain|Homologous_superfamily|Conserved_site
A0A0N9WV34	Klf4	Krueppel-like factor 4	50.7592	A0A0N9WV34;A0A836ABW4	Klf4;JEQ12_008758	Krueppel-like factor 4;C2H2-type domain-containing protein	1.97942e-18	47.2942	0.392055	0.148691	0.397885	0.504873	0.495711	0.40328	0.497241	0.222025	0.362245	0.22117	0.41352	0.250974	0.493242	0.509761	0.546322	0.48169	-0.275414	0.216436	0.0313403	0.621934	0.480193	0.496382	0.637519	0.398103	Krueppel-like factor 4	100302636	Klf4			oas04550,oas05207	Signaling pathways regulating pluripotency of stem cells|Chemical carcinogenesis - receptor activation	K17846					PF00096	zf-C2H2	Zinc finger, C2H2 type	IPR036236,IPR013087	Homologous_superfamily|Domain
A0A0P0CP67	DRA	MHC class II antigen	28.4269	A0A0P0CP67;A0A6P3T7R2;B8ZY38;B8ZY39;F8TCU8;F8TCU9;Q30828	DRA;JEQ12_010456;Ovar-DRA;Ovar-DRA;DRA;DRA;	MHC class II antigen;Ig-like domain-containing protein;MHC class II antigen;MHC class II antigen;MHC class II antigen (Fragment);MHC class II antigen (Fragment);MHC Ovar-DR-alpha	1.4302e-33	52.545	1.74241	2.19371	1.66434	2.24432	1.4	2.21417	1.32686	2.37236	2.04384	2.45718	2.33402	0.764822	1.32457	2.28726	1.91942	2.12656	1.94409	1.64402	1.51466	1.66029	1.80198	1.82994	1.87914	2.20214	MHC class II antigen	101109747	DRA	GO:0002250,GO:0002504,GO:0042613	adaptive immune response|antigen processing and presentation of peptide or polysaccharide antigen via MHC class II|MHC class II protein complex	oas04514,oas04145,oas04640,oas04612,oas04658,oas04659,oas04672,oas05166,oas05164,oas05168,oas05169,oas05150,oas05152,oas05145,oas05140,oas05310,oas05322,oas05323,oas05320,oas05321,oas05330,oas05332,oas05416,oas04940	Cell adhesion molecules|Phagosome|Hematopoietic cell lineage|Antigen processing and presentation|Th1 and Th2 cell differentiation|Th17 cell differentiation|Intestinal immune network for IgA production|Human T-cell leukemia virus 1 infection|Influenza A|Herpes simplex virus 1 infection|Epstein-Barr virus infection|Staphylococcus aureus infection|Tuberculosis|Toxoplasmosis|Leishmaniasis|Asthma|Syst…	K06752					PF07654,PF00993	C1-set|MHC_II_alpha	Immunoglobulin C1-set domain|Class II histocompatibility antigen, alpha domain	IPR007110,IPR036179,IPR013783,IPR003006,IPR003597,IPR011162,IPR014745,IPR001003	Domain|Homologous_superfamily|Homologous_superfamily|Conserved_site|Domain|Homologous_superfamily|Homologous_superfamily|Domain
A0A0P0QN53	DRB1	MHC class II antigen	30.6108	A0A0P0QN53;A0A2P1BXT0	DRB1;MHC-DRB1	MHC class II antigen	1.66607e-27	50.5594	0.356247	0.911878	0.78518	0.104513	0.239029	1.35426	0.911515	1.56839	1.42618	1.18628	1.02548	0.807826	1.21048	1.04134	0.504686	1.236	1.14665	0.376395	0.302802	0.410454	1.07273	1.05303	-0.325032	0.485176	MHC class II antigen	101119342	DRB1	GO:0002250,GO:0002504,GO:0042613	adaptive immune response|antigen processing and presentation of peptide or polysaccharide antigen via MHC class II|MHC class II protein complex	oas04514,oas04145,oas04640,oas04612,oas04658,oas04659,oas04672,oas05166,oas05164,oas05168,oas05169,oas05150,oas05152,oas05145,oas05140,oas05310,oas05322,oas05323,oas05320,oas05321,oas05330,oas05332,oas05416,oas04940	Cell adhesion molecules|Phagosome|Hematopoietic cell lineage|Antigen processing and presentation|Th1 and Th2 cell differentiation|Th17 cell differentiation|Intestinal immune network for IgA production|Human T-cell leukemia virus 1 infection|Influenza A|Herpes simplex virus 1 infection|Epstein-Barr virus infection|Staphylococcus aureus infection|Tuberculosis|Toxoplasmosis|Leishmaniasis|Asthma|Syst…	K06752					PF07654,PF00969	C1-set|MHC_II_beta	Immunoglobulin C1-set domain|Class II histocompatibility antigen, beta domain	IPR007110,IPR036179,IPR013783,IPR003006,IPR003597,IPR011162,IPR014745,IPR000353	Domain|Homologous_superfamily|Homologous_superfamily|Conserved_site|Domain|Homologous_superfamily|Homologous_superfamily|Domain
A0A0P0QN83	DRB1	MHC class II antigen	30.6368	A0A0P0QN83	DRB1	MHC class II antigen	1.17684e-18	47.3837	-0.663799	0.188326	-0.301923	-0.0629718	-0.845526	0.0250509	-0.415171	0.316567	0.156006	0.049796	0.166195	-0.318388	-0.0545988	0.18453	0.562641	-0.306862	0.647017	-0.0281891	-1.40255	-0.527781	0.0274574	-0.105226	0.0488484	0.174027	MHC class II antigen	101119342	DRB1	GO:0002250,GO:0002504,GO:0042613	adaptive immune response|antigen processing and presentation of peptide or polysaccharide antigen via MHC class II|MHC class II protein complex	oas04514,oas04145,oas04640,oas04612,oas04658,oas04659,oas04672,oas05166,oas05164,oas05168,oas05169,oas05150,oas05152,oas05145,oas05140,oas05310,oas05322,oas05323,oas05320,oas05321,oas05330,oas05332,oas05416,oas04940	Cell adhesion molecules|Phagosome|Hematopoietic cell lineage|Antigen processing and presentation|Th1 and Th2 cell differentiation|Th17 cell differentiation|Intestinal immune network for IgA production|Human T-cell leukemia virus 1 infection|Influenza A|Herpes simplex virus 1 infection|Epstein-Barr virus infection|Staphylococcus aureus infection|Tuberculosis|Toxoplasmosis|Leishmaniasis|Asthma|Syst…	K06752					PF07654,PF00969	C1-set|MHC_II_beta	Immunoglobulin C1-set domain|Class II histocompatibility antigen, beta domain	IPR007110,IPR036179,IPR013783,IPR003006,IPR003597,IPR011162,IPR014745,IPR000353	Domain|Homologous_superfamily|Homologous_superfamily|Conserved_site|Domain|Homologous_superfamily|Homologous_superfamily|Domain
A0A0R5Z2J8	FSTL1	Follistatin-like protein 1	34.8864	A0A0R5Z2J8;A0A6P7EWY0;W5QF69	FSTL1;JEQ12_001401;FSTL1	Follistatin-like protein 1;Uncharacterized protein;Follistatin like 1	2.65253e-27	50.4911	-0.494984	0.311296	-0.280525	-0.63434	-1.00449	-0.705319	-0.547524	-0.496045	-0.374223	-0.259112	-0.7309	-0.553113	-0.646026	-0.549206	-0.478845	-0.880886	-0.602426	-0.166839	-0.415235	-0.65761	-0.765997	-0.326826	-1.15705	-0.476176	Follistatin-like protein 1	101118330	FSTL1	GO:0045446,GO:0043542,GO:0061484,GO:0043066,GO:0005576,GO:0005509	endothelial cell differentiation|endothelial cell migration|hematopoietic stem cell homeostasis|negative regulation of apoptotic process|extracellular region|calcium ion binding								PF09289,PF07648	FOLN|Kazal_2	Follistatin/Osteonectin-like EGF domain|Kazal-type serine protease inhibitor domain	IPR011992,IPR002048,IPR003645,IPR015369,IPR002350,IPR036058,IPR036773	Homologous_superfamily|Domain|Domain|Domain|Domain|Homologous_superfamily|Homologous_superfamily
A0A0R7F1J7	ITGB4	Integrin beta	194.756	A0A0R7F1J7	ITGB4	Integrin beta	3.20396e-51	57.5646	4.13407	4.05773	4.21382	4.32805	4.28557	4.40704	4.29946	4.29419	4.40468	4.16429	4.48549	4.30335	4.29419	4.37116	4.2477	4.24265	4.17162	4.41497	4.17425	4.3866	4.2859	4.4581	4.35219	4.47861	Integrin beta	101119919	ITGB4	GO:0048870,GO:0007160,GO:0031581,GO:0007229,GO:0008305	cell motility|cell-matrix adhesion|hemidesmosome assembly|integrin-mediated signaling pathway|integrin complex	oas04151,oas04512,oas04510,oas04810,oas05165,oas05410,oas05412,oas05414	PI3K-Akt signaling pathway|ECM-receptor interaction|Focal adhesion|Regulation of actin cytoskeleton|Human papillomavirus infection|Hypertrophic cardiomyopathy|Arrhythmogenic right ventricular cardiomyopathy|Dilated cardiomyopathy	K06525					PF03160,PF00041,PF18372,PF07965,PF00362,PF17205	Calx-beta|fn3|I-EGF_1|Integrin_B_tail|Integrin_beta|PSI_integrin	Calx-beta domain|Fibronectin type III domain|Integrin beta epidermal growth factor like domain 1|Integrin beta tail domain|Integrin beta chain VWA domain|Integrin plexin domain	IPR038081,IPR003644,IPR000742,IPR003961,IPR036116,IPR040622,IPR013783,IPR033760,IPR015812,IPR012013,IPR012896,IPR036349,IPR002369,IPR036465	Homologous_superfamily|Domain|Domain|Domain|Homologous_superfamily|Domain|Homologous_superfamily|Domain|Family|Family|Domain|Homologous_superfamily|Domain|Homologous_superfamily
A0A0U1YZ59	adipoq	Adiponectin	25.9852	A0A0U1YZ59;A0A6P3CYL5;W5QH34;X4ZFS1	adipoq;JEQ12_001507;ADIPOQ;AdipoQ	Adiponectin;Uncharacterized protein;C1q domain-containing protein;Adiponectin	1.96874e-13	45.1135	4.32381	4.23738	4.01476	4.70026	3.96515	4.53548	4.20677	3.48824	3.93179	3.64603	3.84837	4.35859	4.21498	4.26053	4.08371	3.88228	3.97886	3.84131	4.36547	4.25785	3.79234	3.99846	4.18549	3.79522	Adiponectin	101111848	adipoq	GO:0005576	extracellular region	oas04152,oas04920,oas03320,oas04211,oas04930,oas04936,oas04932	AMPK signaling pathway|Adipocytokine signaling pathway|PPAR signaling pathway|Longevity regulating pathway|Type II diabetes mellitus|Alcoholic liver disease|Non-alcoholic fatty liver disease	K07296					PF00386,PF01391	C1q|Collagen	C1q domain|Collagen triple helix repeat (20 copies)	IPR001073,IPR008160,IPR008983	Domain|Repeat|Homologous_superfamily
A0A0U2UDT4	eIF2aK2	Interferon-induced double-stranded RNA-activated protein kinase	61.7419	A0A0U2UDT4;W5PJ40	eIF2aK2;EIF2AK2	Interferon-induced double-stranded RNA-activated protein kinase;Eukaryotic translation initiation factor 2 alpha kinase 2	6.57259e-26	50.0178	0.596607	0.996211	0.860347	0.797136	0.734576	0.704218	0.760474	1.13446	0.967718	1.30022	1.06489	0.577058	0.918827	0.918631	0.823289	0.613596	1.03422	0.909204	0.936779	0.544925	0.671646	0.945989	0.761054	0.876819	Interferon-induced double-stranded RNA-activated protein kinase	101121673	eIF2aK2	GO:0140374,GO:0034198,GO:0030968,GO:0043066,GO:0033689,GO:0017148,GO:0045071,GO:0032722,GO:0051092,GO:1901224,GO:0032874,GO:0046777,GO:1902036,GO:1902033,GO:1900225,GO:0035455,GO:0006412,GO:0005829,GO:0048471,GO:0005524,GO:0003725,GO:0004694,GO:0042802,GO:0140677	antiviral innate immune response|cellular response to amino acid starvation|endoplasmic reticulum unfolded protein response|negative regulation of apoptotic process|negative regulation of osteoblast proliferation|negative regulation of translation|negative regulation of viral genome replication|positive regulation of chemokine production|positive regulation of NF-kappaB transcription factor activ…	oas04141,oas04217,oas05203,oas05160,oas05171,oas05164,oas05162,oas05168,oas05167,oas05169,oas05165,oas05010	Protein processing in endoplasmic reticulum|Necroptosis|Viral carcinogenesis|Hepatitis C|Coronavirus disease - COVID-19|Influenza A|Measles|Herpes simplex virus 1 infection|Kaposi sarcoma-associated herpesvirus infection|Epstein-Barr virus infection|Human papillomavirus infection|Alzheimer disease	K16195					PF00035,PF00069	dsrm|Pkinase	Double-stranded RNA binding motif|Protein kinase domain	IPR014720,IPR044453,IPR011009,IPR000719,IPR017441,IPR008271	Domain|Domain|Homologous_superfamily|Domain|Binding_site|Active_site
A0A140CQ81	KRTAP6-3	Keratin-associated protein 6-3	7.69145	A0A140CQ81;A0A140CQ83;A0A140CQ84;A0A6B9KT48;D3JUU3	KRTAP6-3;KRTAP6-3;KRTAP6-3;KRTAP6-3;KAP6-3	Keratin-associated protein 6-3;Keratin-associated protein 6-3;Keratin-associated protein 6-3;Keratin associated protein 6-3;Glycine/tyrosine-rich keratin-associated protein 6-3	2.64091e-16	46.4159	3.32158	3.57029	5.05913	4.82243	4.49743	4.43789	4.94531	2.02076	4.47664	5.08906	4.50758	3.69057	4.25796	3.6513	2.79675	5.39888	4.9673	3.88977	4.03068	3.83413	3.94373	4.53084	5.22956	4.85113	Keratin-associated protein 6-3	100499198	KRTAP6-3	GO:0031424,GO:0005882	keratinization|intermediate filament								PF11759	KRTAP	Keratin-associated matrix	IPR040313,IPR021743	Family|Family
A0A140CQ90	KRTAP6-5	Keratin-associated protein 6-5	8.48328	A0A140CQ90;A0A140CQ92;A0A140CQ93;A0A836AMM5;A0A836APW6;C0LJF6;C0LJG2;D3JUT9;I1VZU3	KRTAP6-5;KRTAP6-5;KRTAP6-5;JEQ12_001200;JEQ12_001201;KAP6;KAP6;KAP6-2;KAP6	Keratin-associated protein 6-5;Keratin-associated protein 6-5;Keratin-associated protein 6-5;Uncharacterized protein;Uncharacterized protein;Keratin associated protein 6 (Fragment);Keratin associated protein 6 (Fragment);Glycine/tyrosine-rich keratin-associated protein 6-2;Keratin associated protein 6	5.05878e-07	42.2468	7.09355	6.45314	7.92412	7.48373	7.47777	7.16516	7.71568	6.55975	7.36445	6.34497	5.62552	6.87018	7.5941	6.63299	5.17823	8.09618	7.68973	7.22917	7.10409	7.48529	7.65212	7.71936	7.89635	6.95168	Keratin-associated protein 6-5	100499198	KRTAP6-5	GO:0031424,GO:0005882	keratinization|intermediate filament								PF11759	KRTAP	Keratin-associated matrix	IPR040313,IPR021743	Family|Family
A0A140GI28	Rpl27	60S ribosomal protein L27 (Fragment)	14.2168	A0A140GI28;A0A836CZ46	Rpl27;JEQ12_002708	60S ribosomal protein L27 (Fragment);60S ribosomal protein L27	6.39136e-22	48.6167	4.69675	4.8838	5.01697	5.06905	5.09293	5.15434	4.9832	4.92431	5.11191	5.08816	4.97173	4.63998	4.88497	5.0575	4.96058	5.02733	4.91515	5.03311	4.56869	4.8348	5.02688	4.98561	4.89404	5.09048	60S ribosomal protein L27 (Fragment)	101113347	Rpl27	GO:0006412,GO:0031090,GO:1990904,GO:0005840,GO:0005791,GO:0003735	translation|organelle membrane|ribonucleoprotein complex|ribosome|rough endoplasmic reticulum|structural constituent of ribosome	oas03010,oas05171	Ribosome|Coronavirus disease - COVID-19	K02901					PF00467,PF01777	KOW|Ribosomal_L27e	KOW motif|Ribosomal L27e protein family	IPR005824,IPR041991,IPR038655,IPR001141,IPR008991	Domain|Domain|Homologous_superfamily|Family|Homologous_superfamily
A0A173FE51		Fibroblast growth factor (Fragment)	6.64054	A0A173FE51;P20003;Q4JH23;Q9N0V2	;FGF2;;FGF-2	Fibroblast growth factor (Fragment);Fibroblast growth factor 2;Fibroblast growth factor;Fibroblast growth factor (Fragment)	2.33073e-23	49.1324	-0.978584	-1.13791	-1.15926	-0.884839	-0.849635	-2.04898	-1.47562	-1.41667	-1.12291	-1.87018	-1.31413	-0.99028	-1.11103	-1.23967	-1.09368	-1.65832	-2.27331	-1.70524	-1.50573	-0.511966	-0.971096	-1.5045	-1.13981	-1.71237	Fibroblast growth factor (Fragment)	443306		GO:0008083	growth factor activity	oas04010,oas04014,oas04015,oas04020,oas04151,oas04550,oas04810,oas05200,oas05205,oas05207,oas05226,oas05218,oas05224,oas05167,oas01521	MAPK signaling pathway|Ras signaling pathway|Rap1 signaling pathway|Calcium signaling pathway|PI3K-Akt signaling pathway|Signaling pathways regulating pluripotency of stem cells|Regulation of actin cytoskeleton|Pathways in cancer|Proteoglycans in cancer|Chemical carcinogenesis - receptor activation|Gastric cancer|Melanoma|Breast cancer|Kaposi sarcoma-associated herpesvirus infection|EGFR tyrosine…	K18497					PF00167	FGF	Fibroblast growth factor	IPR002209,IPR008996	Family|Homologous_superfamily
A0A1D9CFF1	Notch2	Notch2	265.244	A0A1D9CFF1;A0A836APZ7;W5QGV9	Notch2;JEQ12_000737;NOTCH2	Notch2;Neurogenic locus notch homolog protein 2;Notch receptor 2	6.76412e-36	53.2707	-0.351722	-0.234725	-0.189687	-0.261699	-0.0518251	-0.134088	-0.155506	-0.380113	-0.126309	-0.000667283	-0.135597	-0.158931	-0.395267	0.00207099	-0.222951	-0.244129	-0.247275	-0.065822	-0.127683	-0.168221	-0.136101	-0.000864856	-0.163539	-0.00823394	Notch2	101112098	Notch2	GO:0006915,GO:0030154,GO:0071228,GO:0007219,GO:0050793,GO:0006355,GO:0005634,GO:0005886,GO:0043235,GO:0005509,GO:0038023	apoptotic process|cell differentiation|cellular response to tumor cell|Notch signaling pathway|regulation of developmental process|regulation of DNA-templated transcription|nucleus|plasma membrane|receptor complex|calcium ion binding|signaling receptor activity	oas04330,oas04658,oas04919,oas05200,oas05206,oas05207,oas05224,oas05165,oas01522	Notch signaling pathway|Th1 and Th2 cell differentiation|Thyroid hormone signaling pathway|Pathways in cancer|MicroRNAs in cancer|Chemical carcinogenesis - receptor activation|Breast cancer|Human papillomavirus infection|Endocrine resistance	K20994					PF12796,PF13857,PF00008,PF07645,PF12661,PF06816,PF07684,PF00066	Ank_2|Ank_5|EGF|EGF_CA|hEGF|NOD|NODP|Notch	Ankyrin repeats (3 copies)|Ankyrin repeats (many copies)|EGF-like domain|Calcium-binding EGF domain|Human growth factor-like EGF|NOTCH protein|NOTCH protein|LNR domain	IPR002110,IPR036770,IPR001881,IPR013032,IPR000742,IPR000152,IPR018097,IPR009030,IPR008297,IPR035993,IPR022336,IPR024600,IPR000800,IPR010660,IPR011656	Repeat|Homologous_superfamily|Domain|Conserved_site|Domain|PTM|Conserved_site|Homologous_superfamily|Family|Homologous_superfamily|Family|Domain|Domain|Domain|Domain
A0A1L2C878	KRT5	Keratin 5 (Fragment)	8.53264	A0A1L2C878	KRT5	Keratin 5 (Fragment)	0.00300678	30.4368			-1.4709				-0.989091	-1.08417	-0.636185	-0.621686	-1.30958	-0.620986	-1.12286	-0.695873	-1.24701	-1.56499	-0.903508	-1.12681				-1.47444	-0.882105	-0.911182	Keratin 5 (Fragment)	100303605	KRT5	GO:0045095	keratin filament								PF00038	Filament	Intermediate filament protein	IPR039008,IPR003054	Domain|Family
A0A1P8DS33	KRTAP26-1	Keratin-associated protein	19.3418	A0A1P8DS33;A0A1P8DS34;A0A1P8DS35;A0A6P7DS50	KRTAP26-1;KRTAP26-1;KRTAP26-1;JEQ12_001222	Keratin-associated protein	2.59659e-14	45.5257	2.30198	2.25007	2.73573	2.53882	2.83962	1.97556	2.50588	2.44327	2.69099	2.61073	2.18832	2.18056	2.19249	1.96211	2.04599	2.4648	2.41651	2.47708	2.72509	2.56024	2.54952	2.94453	2.89921	2.57208	Keratin-associated protein	101106558	KRTAP26-1	GO:0005829,GO:0045095,GO:0005198	cytosol|keratin filament|structural molecule activity								PF05287	PMG	PMG protein	IPR007659,IPR007951	Family|Family
A0A1W6S9X2	KRTAP15-1	Keratin-associated protein	14.6082	A0A1W6S9X2;A0A482P1S0;A0A482P4V4;A0A482P7A2	KRTAP15-1	Keratin-associated protein	2.85775e-09	43.3914	1.9573		3.28492			3.43717								3.57189	2.32036	3.58533	2.73897	3.63664	2.7431	2.10002	2.16487	2.3806	2.3338	2.64733	Keratin-associated protein	114113396	KRTAP15-1	GO:0005829,GO:0045095	cytosol|keratin filament								PF05287	PMG	PMG protein	IPR007951	Family
A0A1X9T5Y7	EDNRB	Endothelin receptor type B	49.5005	A0A1X9T5Y7;A0A836AAK1;W5NPP6	EDNRB;JEQ12_002216;EDNRB	Endothelin receptor type B	3.95061e-17	46.7641	-0.0214	-0.607188	0.120218	0.195517	0.259806	0.199396	-0.0490506	-0.171371	-0.13111	0.0277823	0.418201	-0.242122	0.000900793	0.0683904	-0.211935	-0.316493	-0.217381	0.073899	-0.46956	-0.421933	0.127189	0.368203	-0.147244	0.356737	Endothelin receptor type B	443139	EDNRB	GO:0032341,GO:0070588,GO:0019722,GO:0060070,GO:0048484,GO:0035645,GO:0061028,GO:0010467,GO:0030202,GO:0007249,GO:0048246,GO:0030318,GO:0014043,GO:0051248,GO:0000122,GO:0001755,GO:0097402,GO:0007422,GO:0060465,GO:0072112,GO:0007497,GO:0071806,GO:0002027,GO:0006885,GO:0097018,GO:0035812,GO:0070294,GO:0002001,GO:0010033,GO:1904383,GO:0014826,GO:0005886,GO:0004962,GO:0017046	aldosterone metabolic process|calcium ion transmembrane transport|calcium-mediated signaling|canonical Wnt signaling pathway|enteric nervous system development|enteric smooth muscle cell differentiation|establishment of endothelial barrier|gene expression|heparin metabolic process|I-kappaB kinase/NF-kappaB signaling|macrophage chemotaxis|melanocyte differentiation|negative regulation of neuron ma…	oas04020,oas04022,oas04080,oas04926,oas04916,oas05200	Calcium signaling pathway|cGMP-PKG signaling pathway|Neuroactive ligand-receptor interaction|Relaxin signaling pathway|Melanogenesis|Pathways in cancer	K04198					PF00001	7tm_1	7 transmembrane receptor (rhodopsin family)	IPR000499,IPR001112,IPR000276,IPR017452	Family|Family|Family|Domain
A0A1Y5U0U0	DQB1	MHC class II	29.9722	A0A1Y5U0U0	DQB1	MHC class II	5.41765e-18	47.1182	-1.09138	-0.200899	-0.734946	-0.734977	-1.0326	-0.888747	-1.13857	-1.46604	-2.13701	-2.09533	-2.07572	-0.674348	-1.43899	-0.726376	-1.86779	-1.02915	-1.39968	-0.275939	-1.45801	-0.968841	-1.02219	-1.80755	-2.34088	-1.43542	MHC class II	101120392	DQB1	GO:0002250,GO:0002504,GO:0042613	adaptive immune response|antigen processing and presentation of peptide or polysaccharide antigen via MHC class II|MHC class II protein complex	oas04514,oas04145,oas04640,oas04612,oas04658,oas04659,oas04672,oas05166,oas05164,oas05168,oas05169,oas05150,oas05152,oas05145,oas05140,oas05310,oas05322,oas05323,oas05320,oas05321,oas05330,oas05332,oas05416,oas04940	Cell adhesion molecules|Phagosome|Hematopoietic cell lineage|Antigen processing and presentation|Th1 and Th2 cell differentiation|Th17 cell differentiation|Intestinal immune network for IgA production|Human T-cell leukemia virus 1 infection|Influenza A|Herpes simplex virus 1 infection|Epstein-Barr virus infection|Staphylococcus aureus infection|Tuberculosis|Toxoplasmosis|Leishmaniasis|Asthma|Syst…	K06752					PF07654,PF00969	C1-set|MHC_II_beta	Immunoglobulin C1-set domain|Class II histocompatibility antigen, beta domain	IPR007110,IPR036179,IPR013783,IPR003006,IPR003597,IPR011162,IPR014745,IPR000353	Domain|Homologous_superfamily|Homologous_superfamily|Conserved_site|Domain|Homologous_superfamily|Homologous_superfamily|Domain
A0A1Y5U496	DQB2	MHC class II	29.9473	A0A1Y5U496	DQB2	MHC class II	4.49755e-22	48.6721	1.26148	1.01069	1.15463	1.62585	0.427204	0.183173	1.05829	0.743565	0.54758	-0.165514	0.0178842	0.291661	0.788361	0.924761	1.28672	0.698596	1.31776	-0.370693	0.443259	1.12906	-0.151388	0.126573	0.158041	0.489046	MHC class II	101118514	DQB2	GO:0002250,GO:0002504,GO:0042613	adaptive immune response|antigen processing and presentation of peptide or polysaccharide antigen via MHC class II|MHC class II protein complex	oas04514,oas04145,oas04640,oas04612,oas04658,oas04659,oas04672,oas05166,oas05164,oas05168,oas05169,oas05150,oas05152,oas05145,oas05140,oas05310,oas05322,oas05323,oas05320,oas05321,oas05330,oas05332,oas05416,oas04940	Cell adhesion molecules|Phagosome|Hematopoietic cell lineage|Antigen processing and presentation|Th1 and Th2 cell differentiation|Th17 cell differentiation|Intestinal immune network for IgA production|Human T-cell leukemia virus 1 infection|Influenza A|Herpes simplex virus 1 infection|Epstein-Barr virus infection|Staphylococcus aureus infection|Tuberculosis|Toxoplasmosis|Leishmaniasis|Asthma|Syst…	K06752					PF07654,PF00969	C1-set|MHC_II_beta	Immunoglobulin C1-set domain|Class II histocompatibility antigen, beta domain	IPR007110,IPR036179,IPR013783,IPR003006,IPR003597,IPR011162,IPR014745,IPR000353	Domain|Homologous_superfamily|Homologous_superfamily|Conserved_site|Domain|Homologous_superfamily|Homologous_superfamily|Domain
A0A1Z1GF81		MHC class I antigen (Fragment)	27.4807	A0A1Z1GF81;A0A1Z1GF83		MHC class I antigen (Fragment)	0.000573753	37.1294	1.81324											2.75554					1.34027	3.24187	1.28194	1.23192	1.41756				MHC class I antigen (Fragment)	101113217				oas04514,oas04144,oas04145,oas04218,oas04650,oas04612,oas05203,oas05166,oas05170,oas05168,oas05163,oas05167,oas05169,oas05165,oas05320,oas05330,oas05332,oas05416,oas04940	Cell adhesion molecules|Endocytosis|Phagosome|Cellular senescence|Natural killer cell mediated cytotoxicity|Antigen processing and presentation|Viral carcinogenesis|Human T-cell leukemia virus 1 infection|Human immunodeficiency virus 1 infection|Herpes simplex virus 1 infection|Human cytomegalovirus infection|Kaposi sarcoma-associated herpesvirus infection|Epstein-Barr virus infection|Human papil…	K06751					PF00129	MHC_I	Class I Histocompatibility antigen, domains alpha 1 and 2	IPR007110,IPR036179,IPR013783,IPR011161,IPR037055,IPR011162,IPR001039	Domain|Homologous_superfamily|Homologous_superfamily|Domain|Homologous_superfamily|Homologous_superfamily|Domain
A0A1Z1GF86		MHC class I antigen	40.1419	A0A1Z1GF86		MHC class I antigen	0.000882731	36.2		1.9079	0.829523	3.93807	0.114729	2.07984	2.55905		-0.0727886		-1.2748			-0.130337	-0.133847	0.942568		0.401776		2.01812		-1.38002	1.22906	-0.195856	MHC class I antigen	101107641		GO:0019882,GO:0006955,GO:0030670	antigen processing and presentation|immune response|phagocytic vesicle membrane	oas04514,oas04144,oas04145,oas04218,oas04650,oas04612,oas05203,oas05166,oas05170,oas05168,oas05163,oas05167,oas05169,oas05165,oas05320,oas05330,oas05332,oas05416,oas04940	Cell adhesion molecules|Endocytosis|Phagosome|Cellular senescence|Natural killer cell mediated cytotoxicity|Antigen processing and presentation|Viral carcinogenesis|Human T-cell leukemia virus 1 infection|Human immunodeficiency virus 1 infection|Herpes simplex virus 1 infection|Human cytomegalovirus infection|Kaposi sarcoma-associated herpesvirus infection|Epstein-Barr virus infection|Human papil…	K06751					PF07654,PF00129,PF06623	C1-set|MHC_I|MHC_I_C	Immunoglobulin C1-set domain|Class I Histocompatibility antigen, domains alpha 1 and 2|MHC_I C-terminus	IPR007110,IPR036179,IPR013783,IPR003006,IPR003597,IPR011161,IPR037055,IPR011162,IPR001039,IPR010579	Domain|Homologous_superfamily|Homologous_superfamily|Conserved_site|Domain|Domain|Homologous_superfamily|Homologous_superfamily|Domain|Domain
A0A1Z1VUN6		MHC class I antigen	40.4554	A0A1Z1VUN6		MHC class I antigen	0.000492272	37.4106		1.60887							-0.0367195				1.60811	5.44458	7.88935	0.892883						3.97508	5.45452	2.81863	MHC class I antigen	101111694		GO:0019882,GO:0006955,GO:0030670	antigen processing and presentation|immune response|phagocytic vesicle membrane	oas04514,oas04144,oas04145,oas04218,oas04650,oas04612,oas05203,oas05166,oas05170,oas05168,oas05163,oas05167,oas05169,oas05165,oas05320,oas05330,oas05332,oas05416,oas04940	Cell adhesion molecules|Endocytosis|Phagosome|Cellular senescence|Natural killer cell mediated cytotoxicity|Antigen processing and presentation|Viral carcinogenesis|Human T-cell leukemia virus 1 infection|Human immunodeficiency virus 1 infection|Herpes simplex virus 1 infection|Human cytomegalovirus infection|Kaposi sarcoma-associated herpesvirus infection|Epstein-Barr virus infection|Human papil…	K06751					PF07654,PF00129,PF06623	C1-set|MHC_I|MHC_I_C	Immunoglobulin C1-set domain|Class I Histocompatibility antigen, domains alpha 1 and 2|MHC_I C-terminus	IPR007110,IPR036179,IPR013783,IPR003006,IPR003597,IPR011161,IPR037055,IPR011162,IPR001039,IPR010579	Domain|Homologous_superfamily|Homologous_superfamily|Conserved_site|Domain|Domain|Homologous_superfamily|Homologous_superfamily|Domain|Domain
A0A1Z1VUQ5		MHC class I antigen (Fragment)	41.1874	A0A1Z1VUQ5;A4ZVZ3;C6K2P4	;ovar;ovar	MHC class I antigen (Fragment);MHC class I antigen;MHC class I antigen	1.73719e-06	41.8596	0.0435944	0.333589						-0.129351	-0.13902	-2.49596	-0.0777249	1.94265	0.471209	-2.65762			-0.357022	0.919695	-0.415351	0.822685	-0.27973			-0.325085	MHC class I antigen (Fragment)	100171394		GO:0019882,GO:0006955,GO:0030670	antigen processing and presentation|immune response|phagocytic vesicle membrane	oas04514,oas04144,oas04145,oas04218,oas04650,oas04612,oas05203,oas05166,oas05170,oas05168,oas05163,oas05167,oas05169,oas05165,oas05320,oas05330,oas05332,oas05416,oas04940	Cell adhesion molecules|Endocytosis|Phagosome|Cellular senescence|Natural killer cell mediated cytotoxicity|Antigen processing and presentation|Viral carcinogenesis|Human T-cell leukemia virus 1 infection|Human immunodeficiency virus 1 infection|Herpes simplex virus 1 infection|Human cytomegalovirus infection|Kaposi sarcoma-associated herpesvirus infection|Epstein-Barr virus infection|Human papil…	K06751					PF07654,PF00129,PF06623	C1-set|MHC_I|MHC_I_C	Immunoglobulin C1-set domain|Class I Histocompatibility antigen, domains alpha 1 and 2|MHC_I C-terminus	IPR007110,IPR036179,IPR013783,IPR003006,IPR003597,IPR011161,IPR037055,IPR011162,IPR001039,IPR010579	Domain|Homologous_superfamily|Homologous_superfamily|Conserved_site|Domain|Domain|Homologous_superfamily|Homologous_superfamily|Domain|Domain
A0A286SF73	CD14	Monocyte differentiation antigen CD14	39.6468	A0A286SF73;A0A836A675;Q06AV9;W5QJA2	CD14;JEQ12_016865;CD14;CD14	Monocyte differentiation antigen CD14	6.72592e-31	51.686	2.6539	2.54751	1.91868	2.60502	1.77366	2.47697	2.05613	2.25464	2.37035	2.00877	2.01763	2.8066	2.37044	2.65812	2.62958	2.48267	2.37533	2.30658	2.5007	2.55329	2.10227	2.04984	2.50906	2.39512	Monocyte differentiation antigen CD14	443216	CD14	GO:0006954,GO:0045087,GO:0005576,GO:0005794,GO:0045121,GO:0005886	inflammatory response|innate immune response|extracellular region|Golgi apparatus|membrane raft|plasma membrane	oas04010,oas04064,oas04145,oas04640,oas04620,oas05202,oas05221,oas05132,oas05133,oas05134,oas05152,oas05146,oas05417,oas04936	MAPK signaling pathway|NF-kappa B signaling pathway|Phagosome|Hematopoietic cell lineage|Toll-like receptor signaling pathway|Transcriptional misregulation in cancer|Acute myeloid leukemia|Salmonella infection|Pertussis|Legionellosis|Tuberculosis|Amoebiasis|Lipid and atherosclerosis|Alcoholic liver disease	K04391								IPR001611,IPR032675,IPR016337	Repeat|Homologous_superfamily|Family
A0A2H4Z457	BAD	BCL2 associated agonist of cell death (Fragment)	17.1907	A0A2H4Z457;A0A6P3TF80;W5P8G9	BAD;JEQ12_011190;BAD	BCL2 associated agonist of cell death (Fragment);Bcl2-associated agonist of cell death;BCL2 associated agonist of cell death	6.29945e-16	46.2525	-2.19158	-1.05067	-2.83699	-1.65745	-1.55748	-1.541	-0.754755	-0.885582	-1.31233	-1.64502	-1.35464	-1.25149	-2.32233	-2.35399	-1.98811	-2.38781	-1.21093	-0.769712	-1.10869	-1.02858	-1.6378	-1.55257	-1.96539	-1.46496	BCL2 associated agonist of cell death (Fragment)	780444	BAD	GO:0006915	apoptotic process	oas04012,oas04014,oas04370,oas04024,oas04022,oas04151,oas04140,oas04210,oas04510,oas04062,oas04910,oas04919,oas04722,oas05200,oas05207,oas05208,oas05203,oas05210,oas05212,oas05225,oas05221,oas05220,oas05218,oas05211,oas05215,oas05213,oas05223,oas05170,oas05161,oas05160,oas05162,oas05168,oas05165,oas05152,oas05145,oas05010,oas05014,oas05020,oas05022,oas05417,oas01521,oas01524,oas01522	ErbB signaling pathway|Ras signaling pathway|VEGF signaling pathway|cAMP signaling pathway|cGMP-PKG signaling pathway|PI3K-Akt signaling pathway|Autophagy - animal|Apoptosis|Focal adhesion|Chemokine signaling pathway|Insulin signaling pathway|Thyroid hormone signaling pathway|Neurotrophin signaling pathway|Pathways in cancer|Chemical carcinogenesis - receptor activation|Chemical carcinogenesis - …	K02158					PF10514	Bcl-2_BAD	Pro-apoptotic Bcl-2 protein, BAD	IPR018868	Family
A0A2I7ZBZ4	COX2	Cytochrome c oxidase subunit 2	26.0075	A0A2I7ZBZ4;A0A2I7ZC64;A0A7G9UI94;A0A7G9UIH2;B0EXQ6;B2GMB1;E0A2H0	COX2;COX2;COX2;COX2;CO2;COII;COX2	Cytochrome c oxidase subunit 2;Cytochrome c oxidase subunit 2;Cytochrome c oxidase subunit 2;Cytochrome c oxidase subunit 2;Cytochrome c oxidase subunit 2;Cytochrome c oxidase subunit 2 (Fragment);Cytochrome c oxidase subunit 2	1.4101e-21	48.4918	1.97398	2.02297	1.77556	1.88817	1.9959	1.82569	1.7284	1.77224	2.00735	1.13889	1.59056	1.88084	2.00794	2.03843	1.95603	1.91462	1.83889	1.74147	2.14552	2.0917	2.09995	1.89912	1.81755	1.76561	Cytochrome c oxidase subunit 2	808252	COX2	GO:0005743,GO:0070469,GO:0005507,GO:0004129	mitochondrial inner membrane|respirasome|copper ion binding|cytochrome-c oxidase activity	oas00190,oas04260,oas04714,oas05208,oas05010,oas05012,oas05014,oas05016,oas05020,oas05022,oas05415,oas04932	Oxidative phosphorylation|Cardiac muscle contraction|Thermogenesis|Chemical carcinogenesis - reactive oxygen species|Alzheimer disease|Parkinson disease|Amyotrophic lateral sclerosis|Huntington disease|Prion disease|Pathways of neurodegeneration - multiple diseases|Diabetic cardiomyopathy|Non-alcoholic fatty liver disease	K02261					PF00116,PF02790	COX2|COX2_TM	Cytochrome C oxidase subunit II, periplasmic domain|Cytochrome C oxidase subunit II, transmembrane domain	IPR045187,IPR002429,IPR034210,IPR001505,IPR008972,IPR014222,IPR011759,IPR036257	Family|Domain|Domain|Binding_site|Homologous_superfamily|Domain|Domain|Homologous_superfamily
A0A2I7ZCE8	ATP8	ATP synthase protein 8	7.90949	A0A2I7ZCE8;A0A2I7ZCZ2;A0A455JB00;A0A7G9UGH1;E0A2H1;O78751;Q5MA73	ATP8;ATP8;ATP8;ATP8;ATP8;MT-ATP8;ATP8	ATP synthase protein 8	1.591e-17	46.9274	1.44838	1.09214	1.67789	0.994797	1.36391	1.19102	1.47163	1.44675	0.991008	1.43352	1.15785	1.43747	1.09883	1.06668	1.35024	1.36085	1.3237	1.15871	1.1444	0.865353	1.34413	1.62605	1.27921	1.45906	ATP synthase protein 8	808253	ATP8	GO:0015986,GO:0000276,GO:0015078	proton motive force-driven ATP synthesis|mitochondrial proton-transporting ATP synthase complex, coupling factor F(o)|proton transmembrane transporter activity	oas00190,oas04714,oas05208,oas05010,oas05012,oas05014,oas05016,oas05020,oas05022,oas05415	Oxidative phosphorylation|Thermogenesis|Chemical carcinogenesis - reactive oxygen species|Alzheimer disease|Parkinson disease|Amyotrophic lateral sclerosis|Huntington disease|Prion disease|Pathways of neurodegeneration - multiple diseases|Diabetic cardiomyopathy	K02125					PF00895	ATP-synt_8	ATP synthase protein 8	IPR039017,IPR001421	Family|Family
A0A2P9DU16	Class I MHC Ovar-N*	MHC class I molecule (Fragment)	40.0181	A0A2P9DU16	Class I MHC Ovar-N*	MHC class I molecule (Fragment)	6.93175e-21	48.2376	-1.25999							0.836157	0.826488	3.03514	-3.38784	1.3585	0.810687	1.70134	1.01117	0.232732	1.91942	-1.96321	-0.0330893	0.709992	0.102532	1.87226	1.72913	-0.12921	MHC class I molecule (Fragment)	100171394	Class	GO:0019882,GO:0006955,GO:0030670	antigen processing and presentation|immune response|phagocytic vesicle membrane	oas04514,oas04144,oas04145,oas04218,oas04650,oas04612,oas05203,oas05166,oas05170,oas05168,oas05163,oas05167,oas05169,oas05165,oas05320,oas05330,oas05332,oas05416,oas04940	Cell adhesion molecules|Endocytosis|Phagosome|Cellular senescence|Natural killer cell mediated cytotoxicity|Antigen processing and presentation|Viral carcinogenesis|Human T-cell leukemia virus 1 infection|Human immunodeficiency virus 1 infection|Herpes simplex virus 1 infection|Human cytomegalovirus infection|Kaposi sarcoma-associated herpesvirus infection|Epstein-Barr virus infection|Human papil…	K06751					PF07654,PF00129,PF06623	C1-set|MHC_I|MHC_I_C	Immunoglobulin C1-set domain|Class I Histocompatibility antigen, domains alpha 1 and 2|MHC_I C-terminus	IPR007110,IPR036179,IPR013783,IPR003006,IPR003597,IPR011161,IPR037055,IPR011162,IPR001039,IPR010579	Domain|Homologous_superfamily|Homologous_superfamily|Conserved_site|Domain|Domain|Homologous_superfamily|Homologous_superfamily|Domain|Domain
A0A2P9DU36	Class I MHC Ovar-N*	MHC class I molecule (Fragment)	39.9267	A0A2P9DU36	Class I MHC Ovar-N*	MHC class I molecule (Fragment)	7.207e-40	54.4644	4.75438	4.59124	5.56302	5.767	4.75447	3.01017	5.27308	5.51113	5.30573	5.31703	5.0889	4.67597	4.67353	5.35545	5.03131	4.65152	4.83697	5.3847	4.45568	5.13288	4.54576	4.82649	5.47899	5.16079	MHC class I molecule (Fragment)	100171394	Class	GO:0019882,GO:0006955,GO:0030670	antigen processing and presentation|immune response|phagocytic vesicle membrane	oas04514,oas04144,oas04145,oas04218,oas04650,oas04612,oas05203,oas05166,oas05170,oas05168,oas05163,oas05167,oas05169,oas05165,oas05320,oas05330,oas05332,oas05416,oas04940	Cell adhesion molecules|Endocytosis|Phagosome|Cellular senescence|Natural killer cell mediated cytotoxicity|Antigen processing and presentation|Viral carcinogenesis|Human T-cell leukemia virus 1 infection|Human immunodeficiency virus 1 infection|Herpes simplex virus 1 infection|Human cytomegalovirus infection|Kaposi sarcoma-associated herpesvirus infection|Epstein-Barr virus infection|Human papil…	K06751					PF07654,PF00129,PF06623	C1-set|MHC_I|MHC_I_C	Immunoglobulin C1-set domain|Class I Histocompatibility antigen, domains alpha 1 and 2|MHC_I C-terminus	IPR007110,IPR036179,IPR013783,IPR003006,IPR003597,IPR011161,IPR037055,IPR011162,IPR001039,IPR010579	Domain|Homologous_superfamily|Homologous_superfamily|Conserved_site|Domain|Domain|Homologous_superfamily|Homologous_superfamily|Domain|Domain
A0A2R7Z6G7	LGP2	DExH-Box Helicase 58 (Fragment)	14.0172	A0A2R7Z6G7;A0A836A6Q1;W5QAJ1	LGP2;JEQ12_002746;DHX58	DExH-Box Helicase 58 (Fragment);RNA helicase;RNA helicase	0.000512227	37.3404		-6.26246	-4.746	-6.16956	-5.38903	-6.09052	-5.48295	-6.29252	-5.3298	-6.26051	-5.92329	-5.89879	-5.77361				-5.56739					-4.81903			DExH-Box Helicase 58 (Fragment)	101121528	LGP2	GO:0005524,GO:0003677,GO:0004386,GO:0016787	ATP binding|DNA binding|helicase activity|hydrolase activity	oas04622	RIG-I-like receptor signaling pathway	K12649					PF04851	ResIII	Type III restriction enzyme, res subunit	IPR006935,IPR014001,IPR027417	Domain|Domain|Homologous_superfamily
A0A377TEY1	MHC class II DQB1	Cell surface protein	29.7007	A0A377TEY1	MHC class II DQB1	Cell surface protein	0.000252926	38.3909		-2.59918	-2.26341	-3.46491	-2.7104	-1.1216	-2.54835	0.6952	-1.56408	1.50319	1.58675	-2.5975	1.7966	0.560949	1.39028	-1.61848		-3.06919			-2.34814	1.63619	0.570885	1.63316	Cell surface protein	101120392	MHC	GO:0002250,GO:0002504,GO:0042613	adaptive immune response|antigen processing and presentation of peptide or polysaccharide antigen via MHC class II|MHC class II protein complex	oas04514,oas04145,oas04640,oas04612,oas04658,oas04659,oas04672,oas05166,oas05164,oas05168,oas05169,oas05150,oas05152,oas05145,oas05140,oas05310,oas05322,oas05323,oas05320,oas05321,oas05330,oas05332,oas05416,oas04940	Cell adhesion molecules|Phagosome|Hematopoietic cell lineage|Antigen processing and presentation|Th1 and Th2 cell differentiation|Th17 cell differentiation|Intestinal immune network for IgA production|Human T-cell leukemia virus 1 infection|Influenza A|Herpes simplex virus 1 infection|Epstein-Barr virus infection|Staphylococcus aureus infection|Tuberculosis|Toxoplasmosis|Leishmaniasis|Asthma|Syst…	K06752					PF07654,PF00969	C1-set|MHC_II_beta	Immunoglobulin C1-set domain|Class II histocompatibility antigen, beta domain	IPR007110,IPR036179,IPR013783,IPR003006,IPR003597,IPR011162,IPR014745,IPR000353	Domain|Homologous_superfamily|Homologous_superfamily|Conserved_site|Domain|Homologous_superfamily|Homologous_superfamily|Domain
A0A384SMG2	ND3	NADH-ubiquinone oxidoreductase chain 3	13.1347	A0A384SMG2;E0A2H4;O78753;Q5MA70	ND3;ND3;MT-ND3;ND3	NADH-ubiquinone oxidoreductase chain 3	1.64814e-24	49.5354	1.59554	1.29263	1.84112	1.9001	1.04484	1.34821	1.87449	1.11278	1.27592	1.50496	1.05446	0.0166257	1.26293	0.968029	0.638713	1.98178	1.26337	0.588392	1.06219	1.21689	1.15576	0.645714	0.940677	1.23903	NADH-ubiquinone oxidoreductase chain 3	808255	ND3	GO:0031966,GO:0070469,GO:0008137	mitochondrial membrane|respirasome|NADH dehydrogenase (ubiquinone) activity	oas00190,oas04723,oas04714,oas05208,oas05010,oas05012,oas05014,oas05016,oas05020,oas05022,oas05415	Oxidative phosphorylation|Retrograde endocannabinoid signaling|Thermogenesis|Chemical carcinogenesis - reactive oxygen species|Alzheimer disease|Parkinson disease|Amyotrophic lateral sclerosis|Huntington disease|Prion disease|Pathways of neurodegeneration - multiple diseases|Diabetic cardiomyopathy	K03880					PF00507	Oxidored_q4	NADH-ubiquinone/plastoquinone oxidoreductase, chain 3	IPR000440,IPR038430	Family|Homologous_superfamily
A0A386K120		KROX20 protein	51.3717	A0A386K120;A0A835ZJ19	;JEQ12_012907	KROX20 protein;C2H2-type domain-containing protein	3.7626e-12	44.5355	0.311036	-0.190342	0.4079	0.457095	0.597941	0.122989	0.129477	0.0333731	0.278371	0.30332	0.0883975	0.212587	0.284928	0.212475	0.501795	-0.247932	-0.0642389	0.267798	-0.212197	0.0693304	0.461715	0.0750618	0.193608	0.208486	KROX20 protein	101122407		GO:0005634,GO:0003677,GO:0046872	nucleus|DNA binding|metal ion binding	oas04625,oas05203,oas05166,oas05161	C-type lectin receptor signaling pathway|Viral carcinogenesis|Human T-cell leukemia virus 1 infection|Hepatitis B	K12496					PF11928,PF00096	DUF3446|zf-C2H2	Early growth response N-terminal domain|Zinc finger, C2H2 type	IPR021849,IPR036236,IPR013087	Domain|Homologous_superfamily|Domain
A0A3B1DQQ0	MHC class II DQA1	Cell surface protein	28.2403	A0A3B1DQQ0;A8IW63;F8T848;F8T853;F8T858;Q30841	MHC class II DQA1;DQA1;DQA;DQA;DQA;OLA-DQA	Cell surface protein;MHC class II DQA;MHC class II antigen (Fragment);MHC class II antigen (Fragment);MHC class II antigen (Fragment);MHC class II OLA-DQ-alpha (Fragment)	3.3131e-29	51.1275	-0.437396	1.45208	0.969407	1.23891	0.309873	1.07104	2.18141	1.86473	-0.455759	-0.0668307	0.730074	0.401027	0.947639	0.52133	-0.631523	1.92019	1.64111	0.147615	0.396636	0.716475	0.766428	1.61281	0.0387438	0.0652447	Cell surface protein	101108696	MHC	GO:0002250,GO:0002504,GO:0042613	adaptive immune response|antigen processing and presentation of peptide or polysaccharide antigen via MHC class II|MHC class II protein complex	oas04514,oas04145,oas04640,oas04612,oas04658,oas04659,oas04672,oas05166,oas05164,oas05168,oas05169,oas05150,oas05152,oas05145,oas05140,oas05310,oas05322,oas05323,oas05320,oas05321,oas05330,oas05332,oas05416,oas04940	Cell adhesion molecules|Phagosome|Hematopoietic cell lineage|Antigen processing and presentation|Th1 and Th2 cell differentiation|Th17 cell differentiation|Intestinal immune network for IgA production|Human T-cell leukemia virus 1 infection|Influenza A|Herpes simplex virus 1 infection|Epstein-Barr virus infection|Staphylococcus aureus infection|Tuberculosis|Toxoplasmosis|Leishmaniasis|Asthma|Syst…	K06752					PF07654,PF00993	C1-set|MHC_II_alpha	Immunoglobulin C1-set domain|Class II histocompatibility antigen, alpha domain	IPR007110,IPR036179,IPR013783,IPR003006,IPR003597,IPR011162,IPR014745,IPR001003	Domain|Homologous_superfamily|Homologous_superfamily|Conserved_site|Domain|Homologous_superfamily|Homologous_superfamily|Domain
A0A3G0YYZ8	Srebp1	Sterol regulatory element binding transcription factor 1	120.972	A0A3G0YYZ8;A0A6P7EH68;W5NTS7	Srebp1;JEQ12_002969;SREBF1	Sterol regulatory element binding transcription factor 1;Uncharacterized protein;Sterol regulatory element binding transcription factor 1	0.000326033	38.0559	5.12411	3.25984	5.20769	3.35273	4.42709	1.48411	3.37131	2.39157	3.66263	3.50856	2.3941	3.47575	5.42583	4.99993	4.14911	4.81752	5.67752	5.89576	5.19606	6.00415	5.92179	3.08224	5.2466	4.24883	Sterol regulatory element binding transcription factor 1	100329218	Srebp1	GO:0009267,GO:0006695,GO:0007623,GO:0045444,GO:0008286,GO:0030073,GO:0042789,GO:0046676,GO:0000122,GO:0045542,GO:1902895,GO:0010867,GO:1903146,GO:0019217,GO:0003062,GO:0031647,GO:1903214,GO:0009749,GO:0032933,GO:0005737,GO:0016020,GO:0005634,GO:0003682,GO:0001228,GO:0004879,GO:0046983,GO:0019901,GO:0032810,GO:0001221	cellular response to starvation|cholesterol biosynthetic process|circadian rhythm|fat cell differentiation|insulin receptor signaling pathway|insulin secretion|mRNA transcription by RNA polymerase II|negative regulation of insulin secretion|negative regulation of transcription by RNA polymerase II|positive regulation of cholesterol biosynthetic process|positive regulation of miRNA transcription|p…	oas04152,oas04910,oas04936,oas04932,oas04931	AMPK signaling pathway|Insulin signaling pathway|Alcoholic liver disease|Non-alcoholic fatty liver disease|Insulin resistance	K07197					PF00010	HLH	Helix-loop-helix DNA-binding domain	IPR011598,IPR036638	Domain|Homologous_superfamily
A0A3Q9U3M0	PFKM	ATP-dependent 6-phosphofructokinase	93.594	A0A3Q9U3M0;A0A836D7U3	PFKM;JEQ12_014446	ATP-dependent 6-phosphofructokinase	2.0735e-44	55.7559	2.73719	2.5565	2.93181	3.71755	3.01655	3.03024	2.92121	2.85841	2.77692	2.91585	3.04586	3.18371	2.70388	2.05594	2.88229	2.9856	2.8776	2.9281	2.85766	2.90513	3.01859	3.03574	3.0091	2.86029	ATP-dependent 6-phosphofructokinase	443489	PFKM	GO:0061621,GO:0006002,GO:0042593,GO:0005980,GO:0093001,GO:0046716,GO:0032024,GO:0045944,GO:0005945,GO:0016324,GO:0005634,GO:0097228,GO:0003872,GO:0005524,GO:0070061,GO:0042802,GO:0019900,GO:0046872	canonical glycolysis|fructose 6-phosphate metabolic process|glucose homeostasis|glycogen catabolic process|glycolysis from storage polysaccharide through glucose-1-phosphate|muscle cell cellular homeostasis|positive regulation of insulin secretion|positive regulation of transcription by RNA polymerase II|6-phosphofructokinase complex|apical plasma membrane|nucleus|sperm principal piece|6-phosphof…	oas00010,oas00030,oas00051,oas00052,oas03018,oas04066,oas04152,oas04922,oas04919,oas05230	Glycolysis / Gluconeogenesis|Pentose phosphate pathway|Fructose and mannose metabolism|Galactose metabolism|RNA degradation|HIF-1 signaling pathway|AMPK signaling pathway|Glucagon signaling pathway|Thyroid hormone signaling pathway|Central carbon metabolism in cancer	K00850					PF00365	PFK	Phosphofructokinase	IPR009161,IPR022953,IPR041914,IPR015912,IPR000023,IPR035966	Family|Family|Family|Conserved_site|Domain|Homologous_superfamily
A0A3R5SS76		Actg1	41.7928	A0A3R5SS76;A0A6P3EJ42	;JEQ12_002535	Actg1;Uncharacterized protein	3.32815e-20	47.983	5.27861	5.78763	5.68957	5.65112	5.88644	5.6313	5.74369	5.40414	5.88662	5.67705	5.76464	5.64997	5.64109	5.91374	5.37621	5.72955	5.43796	5.72073	5.44323	5.34337	5.66141	5.77205	5.93447	5.47316	Actg1	443340		GO:0001525,GO:0071346,GO:0001738,GO:0030335,GO:0010628,GO:0090303,GO:1902396,GO:0051893,GO:0051492,GO:1900242,GO:0150111,GO:0045214,GO:0120192,GO:0043296,GO:0120220,GO:0044305,GO:0070062,GO:0031941,GO:0030016,GO:0045335,GO:0098685,GO:0042802,GO:0005522,GO:0005200,GO:0031625	angiogenesis|cellular response to type II interferon|morphogenesis of a polarized epithelium|positive regulation of cell migration|positive regulation of gene expression|positive regulation of wound healing|protein localization to bicellular tight junction|regulation of focal adhesion assembly|regulation of stress fiber assembly|regulation of synaptic vesicle endocytosis|regulation of transepithe…	oas04015,oas04390,oas04145,oas04210,oas04510,oas04520,oas04530,oas04814,oas04810,oas04611,oas04613,oas04670,oas04921,oas04919,oas04971,oas04714,oas05205,oas05225,oas05164,oas05132,oas05135,oas05100,oas05014,oas05418,oas05410,oas05412,oas05414,oas05416	Rap1 signaling pathway|Hippo signaling pathway|Phagosome|Apoptosis|Focal adhesion|Adherens junction|Tight junction|Motor proteins|Regulation of actin cytoskeleton|Platelet activation|Neutrophil extracellular trap formation|Leukocyte transendothelial migration|Oxytocin signaling pathway|Thyroid hormone signaling pathway|Gastric acid secretion|Thermogenesis|Proteoglycans in cancer|Hepatocellular ca…	K05692					PF00022	Actin	Actin	IPR004000,IPR020902,IPR004001,IPR043129	Family|Conserved_site|Conserved_site|Homologous_superfamily
A0A3S5HL72		RUNX1T1 protein	67.4543	A0A3S5HL72;A0A6P7ENZ9;A0A835ZZ50;A0A836CYS8;W5PDV8;W5PH37;W5PW82	;JEQ12_004564;JEQ12_019528;JEQ12_004902;CBFA2T2;RUNX1T1;CBFA2T3	RUNX1T1 protein;Uncharacterized protein;RUNX1 partner transcriptional co-repressor 1;Protein CBFA2T3;CBFA2/RUNX1 partner transcriptional co-repressor 2;RUNX1 partner transcriptional co-repressor 1;CBFA2/RUNX1 partner transcriptional co-repressor 3	0.000665708	36.8345	-3.60061	-2.97212	-2.34441	-2.14514	-2.4176	-2.80018	-2.2649	-2.17816	-3.35715	-2.26104	-2.55252	-3.36871	-3.37295	-2.89353	-1.71909	-2.73075	-2.26755	-3.19798	-3.52866	-3.45789	-2.04425	-3.28146	-3.32826	-3.24199	RUNX1T1 protein	101113340		GO:0005634,GO:0046872,GO:0003714	nucleus|metal ion binding|transcription corepressor activity	oas05200,oas05202,oas05221	Pathways in cancer|Transcriptional misregulation in cancer|Acute myeloid leukemia	K10053					PF08788,PF07531,PF01753	NHR2|TAFH|zf-MYND	NHR2 domain like|NHR1 homology to TAF|MYND finger	IPR013290,IPR013289,IPR014896,IPR037249,IPR003894,IPR002893	Family|Family|Domain|Homologous_superfamily|Domain|Domain
A0A571N6A6	NNT	proton-translocating NAD(P)(+) transhydrogenase	113.534	A0A571N6A6;A0A836CVK7;W5PFI3	NNT;JEQ12_006879;NNT	proton-translocating NAD(P)(+) transhydrogenase;proton-translocating NAD(P)(+) transhydrogenase;NAD(P) transhydrogenase, mitochondrial	2.53573e-35	53.0947	1.68129	1.21501	2.11332	2.07229	2.31329	1.73819	2.20344	1.80909	1.93869	2.19456	2.18536	1.72017	2.61191	1.78948	1.63214	2.58361	2.05303	1.8377	2.4556	1.79754	2.22079	2.16501	2.58669	2.08057	proton-translocating NAD(P)(+) transhydrogenase	101121801	NNT	GO:1902600,GO:0016020,GO:0008746	proton transmembrane transport|membrane|NAD(P)+ transhydrogenase activity	oas00760	Nicotinate and nicotinamide metabolism	K00323					PF01262,PF05222,PF02233,PF12769	AlaDh_PNT_C|AlaDh_PNT_N|PNTB|PNTB_4TM	Alanine dehydrogenase/PNT, C-terminal domain|Alanine dehydrogenase/PNT, N-terminal domain|NAD(P) transhydrogenase beta subunit|4TM region of pyridine nucleotide transhydrogenase, mitoch	IPR008143,IPR008142,IPR007886,IPR007698,IPR029035,IPR036291,IPR026255,IPR024605,IPR034300	Conserved_site|Conserved_site|Domain|Domain|Homologous_superfamily|Homologous_superfamily|Family|Domain|Domain
A0A5C2D147	GLOD4	Glyoxalase domain-containing protein 4	26.6542	A0A5C2D147	GLOD4	Glyoxalase domain-containing protein 4	1.27781e-30	51.5936	3.95099	4.25195	4.0624	4.44462	4.01968	4.49931	4.54092	4.29972	4.17458	4.56008	4.43715	4.49077	4.18448	4.38162	4.18981	4.25961	4.18018	4.27853	4.44295	4.23364	4.19019	4.35412	4.23	4.5402	Glyoxalase domain-containing protein 4	114108673	GLOD4													IPR043193,IPR043194,IPR029068,IPR037523	Family|Domain|Homologous_superfamily|Domain
A0A5H1ZRN7	SLC2A1	Solute carrier family 2, facilitated glucose transporter member 1	54.1278	A0A5H1ZRN7;A0A6P7E1B5;P79365	SLC2A1;JEQ12_000217;SLC2A1	Solute carrier family 2, facilitated glucose transporter member 1;Solute carrier family 2, facilitated glucose transporter member 1;Solute carrier family 2, facilitated glucose transporter member 1	7.71322e-13	44.8387	0.221606	0.566659	0.931382	-0.0694883	0.668393	0.343081	0.830729	0.082659	0.580216	-0.485244	0.720698	-0.233213	-0.318801	-0.425622	0.0433073	-0.335979	-0.0242773	-0.0574756	-0.382567	0.0997428	0.210681	-0.176409	-0.649842	0.273597	Solute carrier family 2, facilitated glucose transporter member 1	443461	SLC2A1	GO:0001917,GO:0005886,GO:0005355	photoreceptor inner segment|plasma membrane|glucose transmembrane transporter activity	oas04066,oas04911,oas04922,oas04920,oas04919,oas04976,oas05200,oas05230,oas05211,oas05166,oas05415,oas04931	HIF-1 signaling pathway|Insulin secretion|Glucagon signaling pathway|Adipocytokine signaling pathway|Thyroid hormone signaling pathway|Bile secretion|Pathways in cancer|Central carbon metabolism in cancer|Renal cell carcinoma|Human T-cell leukemia virus 1 infection|Diabetic cardiomyopathy|Insulin resistance	K07299					PF00083	Sugar_tr	Sugar (and other) transporter	IPR002439,IPR045263,IPR020846,IPR005828,IPR036259,IPR003663,IPR005829	Family|Family|Domain|Family|Homologous_superfamily|Family|Conserved_site
A0A5J6SC24	HMOX1	heme oxygenase (biliverdin-producing)	32.7134	A0A5J6SC24;A0A836A8N1;W5QAU1	HMOX1;JEQ12_014780;	heme oxygenase (biliverdin-producing)	1.09647e-34	52.8972	-0.0780821	0.240466	0.191767	0.202252	-0.1929	-0.00668962	-0.0491173	0.0989905	-0.0497573	0.254662	-0.172416	0.118768	0.0608284	0.29716	0.0867526	0.24337	-0.356715	-0.464448	-0.191999	-0.304525	0.376946	0.171527	0.200858	0.167964	heme oxygenase (biliverdin-producing)	101120910	HMOX1	GO:0006788,GO:0016020,GO:0004392,GO:0046872	heme oxidation|membrane|heme oxygenase (decyclizing) activity|metal ion binding	oas00860,oas04066,oas04216,oas04978,oas05200,oas05206,oas05208,oas05225,oas05418	Porphyrin metabolism|HIF-1 signaling pathway|Ferroptosis|Mineral absorption|Pathways in cancer|MicroRNAs in cancer|Chemical carcinogenesis - reactive oxygen species|Hepatocellular carcinoma|Fluid shear stress and atherosclerosis	K00510					PF01126	Heme_oxygenase	Heme oxygenase	IPR002051,IPR016053,IPR016084,IPR018207	Family|Family|Homologous_superfamily|Conserved_site
A0A5P8U3M1	KRTAP36-1	Keratin-associated protein variant C	6.23079	A0A5P8U3M1	KRTAP36-1	Keratin-associated protein variant C	1.65707e-11	44.2721	0.896867	0.269091	0.98478	1.00893	-0.119717	1.00723	2.21227	-0.173033	-0.161095	1.43792	1.18122	0.468077	0.820496	1.30021	0.19833	2.30177	1.36155	1.01121	1.53916	1.03959	2.31332	1.22977	2.00271	1.32477	Keratin-associated protein variant C	114113348	KRTAP36-1	GO:0005882	intermediate filament								PF11759	KRTAP	Keratin-associated matrix	IPR021743	Family
A0A679IFK0	Ovar-DRB1	MHC class II DRB (Fragment)	14.467	A0A679IFK0	Ovar-DRB1	MHC class II DRB (Fragment)	1.52917e-18	47.3386		-1.26015	-1.39088	-0.563963	-0.807039	-0.581825	-1.35365				-1.17782			-0.192288	-0.368924	-0.173058	-0.0664557			-0.0426723		-0.758419	-1.01078	-1.38674	MHC class II DRB (Fragment)	101119342	Ovar-DRB1	GO:0019882,GO:0006955,GO:0042613	antigen processing and presentation|immune response|MHC class II protein complex	oas04514,oas04145,oas04640,oas04612,oas04658,oas04659,oas04672,oas05166,oas05164,oas05168,oas05169,oas05150,oas05152,oas05145,oas05140,oas05310,oas05322,oas05323,oas05320,oas05321,oas05330,oas05332,oas05416,oas04940	Cell adhesion molecules|Phagosome|Hematopoietic cell lineage|Antigen processing and presentation|Th1 and Th2 cell differentiation|Th17 cell differentiation|Intestinal immune network for IgA production|Human T-cell leukemia virus 1 infection|Influenza A|Herpes simplex virus 1 infection|Epstein-Barr virus infection|Staphylococcus aureus infection|Tuberculosis|Toxoplasmosis|Leishmaniasis|Asthma|Syst…	K06752					PF00969	MHC_II_beta	Class II histocompatibility antigen, beta domain	IPR011162,IPR014745,IPR000353	Homologous_superfamily|Homologous_superfamily|Domain
A0A679ISK2	Ovar-DRB1	MHC class II DRB (Fragment)	14.5734	A0A679ISK2	Ovar-DRB1	MHC class II DRB (Fragment)	0.000267288	38.3215	1.09779	2.452	-0.0220825	1.95118	1.6942	1.9018	1.47362	1.60711	0.744301	1.45927	1.59669	0.764023	0.759783	1.21031	0.894529	1.63975	1.65882	1.6044	0.955299	1.68688	0.9476	1.95291	1.8078	1.42093	MHC class II DRB (Fragment)	101119342	Ovar-DRB1	GO:0019882,GO:0006955,GO:0042613	antigen processing and presentation|immune response|MHC class II protein complex	oas04514,oas04145,oas04640,oas04612,oas04658,oas04659,oas04672,oas05166,oas05164,oas05168,oas05169,oas05150,oas05152,oas05145,oas05140,oas05310,oas05322,oas05323,oas05320,oas05321,oas05330,oas05332,oas05416,oas04940	Cell adhesion molecules|Phagosome|Hematopoietic cell lineage|Antigen processing and presentation|Th1 and Th2 cell differentiation|Th17 cell differentiation|Intestinal immune network for IgA production|Human T-cell leukemia virus 1 infection|Influenza A|Herpes simplex virus 1 infection|Epstein-Barr virus infection|Staphylococcus aureus infection|Tuberculosis|Toxoplasmosis|Leishmaniasis|Asthma|Syst…	K06752					PF00969	MHC_II_beta	Class II histocompatibility antigen, beta domain	IPR011162,IPR014745,IPR000353	Homologous_superfamily|Homologous_superfamily|Domain
A0A6H0QSJ2	PRNP	Prion (Fragment)	18.7868	A0A6H0QSJ2;A0A6H0QSQ9;A0A6H0QUQ8;A0A6H0QV44;A0A6H0QVT6;H9C7U4;H9C7U9;M4MBK8;M4MF28;Q6RVI3;Q6RYR6;Q712W0	PRNP;PRNP;PRNP;PRNP;PRNP;;;prnp;prnp;prp;prp;PrP	Prion (Fragment);Prion (Fragment);Prion (Fragment);Prion (Fragment);Prion (Fragment);Prion protein (Fragment);Prion protein (Fragment);Prion protein (Fragment);Prion protein (Fragment);Major prion protein (Fragment);Major prion protein (Fragment);Major prion protein	7.82204e-17	46.6405	0.525284	0.225136	0.77672	0.467383	0.441629	-0.247672	0.134326	0.817975	0.447024	1.14846	0.213981	0.41014	1.14348	1.09196	1.49285	0.640221	0.00611905	-0.786505	1.35344	1.43831	0.544218	0.445112	1.29925	0.365987	Prion (Fragment)	493887	PRNP	GO:0051260,GO:0005794,GO:0005886	protein homooligomerization|Golgi apparatus|plasma membrane	oas04216,oas05020,oas05022	Ferroptosis|Prion disease|Pathways of neurodegeneration - multiple diseases	K05634					PF00377	Prion	Prion/Doppel alpha-helical domain	IPR000817,IPR036924,IPR022416	Family|Homologous_superfamily|Domain
A0A6M6I404		Basic helix-loop-helix family member e41 (Fragment)	50.9261	A0A6M6I404;A0A836AHS4	;JEQ12_014858	Basic helix-loop-helix family member e41 (Fragment);Class E basic helix-loop-helix protein 41	0.00120578	35.3227	-3.9558	-4.02254	-2.46936	-3.34311	-3.40505	-2.54562	-3.49617	-4.36311	-5.29677	-3.68633	-4.31148	-2.41736	-4.38858	-3.77792	-3.78143	-3.00907	-2.17026	-3.04644	-3.88386	-3.81308	-3.46781	-3.72119	-3.35223	-2.13492	Basic helix-loop-helix family member e41 (Fragment)	101112806		GO:0006355,GO:0003677,GO:0046983	regulation of DNA-templated transcription|DNA binding|protein dimerization activity	oas04710	Circadian rhythm	K03730					PF07527,PF00010	Hairy_orange|HLH	Hairy Orange|Helix-loop-helix DNA-binding domain	IPR011598,IPR036638,IPR003650	Domain|Homologous_superfamily|Domain
A0A6M6I733		Basic helix-loop-helix family member e40	45.5862	A0A6M6I733;A0A836CSN8;B3F209;W5PDA1	;JEQ12_008291;BHLHE40;BHLHE40	Basic helix-loop-helix family member e40;Class E basic helix-loop-helix protein 40;Class E basic helix-loop-helix protein 40;Basic helix-loop-helix family member e40	0.0075786	25.9032	-0.612606	1.25501	-0.995511	-1.58012	-0.956519	-0.897822	-2.54949	-1.15403	-0.219341	-1.12202	0.518356	-1.17526	-1.17909		0.751235	0.185811				-0.333881					Basic helix-loop-helix family member e40	100169939		GO:0006355,GO:0003677,GO:0046983	regulation of DNA-templated transcription|DNA binding|protein dimerization activity	oas04710	Circadian rhythm	K03729					PF07527,PF00010	Hairy_orange|HLH	Hairy Orange|Helix-loop-helix DNA-binding domain	IPR011598,IPR036638,IPR003650	Domain|Homologous_superfamily|Domain
A0A6M6R7Y5	TPI1	Triosephosphate isomerase	30.6299	A0A6M6R7Y5;A0A836D8B5	TPI1;JEQ12_015016	Triosephosphate isomerase	7.20787e-24	49.3122	6.5603	6.34361	6.34785	6.77778	6.62595	6.82143	6.56451	6.67254	6.62424	6.51601	6.62451	6.70556	6.51563	6.77509	6.57818	6.55739	6.5518	6.67014	6.69913	6.66582	6.5746	6.67599	6.71948	6.69726	Triosephosphate isomerase	101108565	TPI1	GO:0006094,GO:0006096,GO:0008929,GO:0004807	gluconeogenesis|glycolytic process|methylglyoxal synthase activity|triose-phosphate isomerase activity	oas00010,oas00051,oas00562	Glycolysis / Gluconeogenesis|Fructose and mannose metabolism|Inositol phosphate metabolism	K01803					PF00121	TIM	Triosephosphate isomerase	IPR013785,IPR035990,IPR022896,IPR000652,IPR020861	Homologous_superfamily|Homologous_superfamily|Family|Family|Active_site
A0A6P3CWI0	CPT1A	carnitine O-palmitoyltransferase	88.2744	A0A6P3CWI0;A0A835ZRT7;W5Q4U2;W5Q4U5	CPT1A;JEQ12_011337;CPT1A;CPT1A	carnitine O-palmitoyltransferase	1.14267e-28	50.949	0.279769	0.809609	0.573317	0.742809	0.853109	0.692928	0.526207	0.62369	0.41211	0.695483	0.725398	0.528728	0.455625	0.121232	0.493561	0.605111	0.551106	0.779824	0.0216405	0.449186	0.483353	0.467866	0.614674	0.475157	carnitine O-palmitoyltransferase	443434	CPT1A	GO:0006635,GO:0005741,GO:0004095	fatty acid beta-oxidation|mitochondrial outer membrane|carnitine O-palmitoyltransferase activity	oas00071,oas04152,oas04922,oas04920,oas03320,oas04714,oas04936,oas04931	Fatty acid degradation|AMPK signaling pathway|Glucagon signaling pathway|Adipocytokine signaling pathway|PPAR signaling pathway|Thermogenesis|Alcoholic liver disease|Insulin resistance	K08765					PF00755,PF16484	Carn_acyltransf|CPT_N	Choline/Carnitine o-acyltransferase|Carnitine O-palmitoyltransferase N-terminus	IPR000542,IPR023213,IPR039551,IPR042231,IPR032476	Family|Homologous_superfamily|Domain|Homologous_superfamily|Domain
A0A6P3CWQ1	JEQ12_019236	Squalene monooxygenase	63.5906	A0A6P3CWQ1;A6YQW0	JEQ12_019236;sqle	Squalene monooxygenase	4.71223e-20	47.9254	0.993045	0.741261	1.65869	1.26049	1.833	1.2776	1.79482	1.36602	1.43014	1.36008	1.60734	2.16604	1.76937	1.54769	1.7416	2.51114	1.3742	1.09742	2.03648	0.809618	1.34907	2.05588	2.26137	2.00901	Squalene monooxygenase	100125351	JEQ12_019236	GO:0016126,GO:0005789,GO:0050660,GO:0004506	sterol biosynthetic process|endoplasmic reticulum membrane|flavin adenine dinucleotide binding|squalene monooxygenase activity	oas00100	Steroid biosynthesis	K00511					PF08491	SE	Squalene epoxidase	IPR036188,IPR013698,IPR040125	Homologous_superfamily|Domain|Family
A0A6P3CWS4	FcRn	Neonatal Fc receptor alpha chain	39.1899	A0A6P3CWS4;A0A6P7EP66;W5PUL5	FcRn;JEQ12_005554;FCGRT	Neonatal Fc receptor alpha chain;Ig-like domain-containing protein;Fc fragment of IgG receptor and transporter	1.081e-32	52.2659	1.35237	1.98301	0.920071	0.995082	1.22443	1.21147	0.787225	0.949539	1.09551	1.39993	1.12306	1.28515	1.17942	0.867415	1.20224	1.21152	1.04761	1.03561	1.21956	1.02468	1.23665	1.24181	0.997954	0.973706	Neonatal Fc receptor alpha chain	100144766	FcRn										PF07654,PF00129	C1-set|MHC_I	Immunoglobulin C1-set domain|Class I Histocompatibility antigen, domains alpha 1 and 2	IPR007110,IPR036179,IPR013783,IPR003006,IPR003597,IPR011161,IPR037055,IPR011162	Domain|Homologous_superfamily|Homologous_superfamily|Conserved_site|Domain|Domain|Homologous_superfamily|Homologous_superfamily
A0A6P3CWU4		Eyes absent homolog	57.7784	A0A6P3CWU4;A0A836AKL1;C5HK62;W5NYM3	;JEQ12_010030;EYA3;EYA3	Eyes absent homolog	1.22416e-27	50.6045	-1.51917	-1.21191	-1.0712	-1.27388	-0.95869	-1.2944	-1.34752	-1.03532	-1.24731	-0.896557	-1.27455	-1.32994	-1.49798	-1.0067	-1.3791	-1.13197	-1.27432	-0.992259	-1.6971	-1.83082	-1.15062	-1.34826	-1.61947	-1.37312	Eyes absent homolog	100271658		GO:0005634,GO:0046872,GO:0004725	nucleus|metal ion binding|protein tyrosine phosphatase activity											IPR006545,IPR042577,IPR038102,IPR028472	Domain|Domain|Homologous_superfamily|Family
A0A6P3CWU6		Alpha-galactosidase	46.3694	A0A6P3CWU6;A0A836D5R0;W5QBZ7	;JEQ12_015193;NAGA	Alpha-galactosidase	6.21489e-22	48.6211	1.27698	1.75854	1.09299	1.59561	1.21337	1.69847	1.37115	1.38012	1.4029	1.57997	1.51754	1.41584	1.34545	1.50988	1.12503	1.4209	0.751887	1.40193	1.29797	1.67505	1.22432	1.50958	1.50342	1.64042	Alpha-galactosidase	100145858		GO:0005975,GO:0006629,GO:0005764,GO:0004553	carbohydrate metabolic process|lipid metabolic process|lysosome|hydrolase activity, hydrolyzing O-glycosyl compounds	oas00603,oas04142	Glycosphingolipid biosynthesis - globo and isoglobo series|Lysosome	K01204					PF16499,PF17450	Melibiase_2|Melibiase_2_C	Alpha galactosidase A|Alpha galactosidase A C-terminal beta sandwich domain	IPR013785,IPR002241,IPR000111,IPR013780,IPR017853,IPR035373	Homologous_superfamily|Family|Conserved_site|Homologous_superfamily|Homologous_superfamily|Domain
A0A6P3CWV2	JEQ12_014801	Uncharacterized protein	20.6237	A0A6P3CWV2;B2LYK4;W5QCF0	JEQ12_014801;RABL4;IFT27	Uncharacterized protein;RAS oncogene family-like 4;Intraflagellar transport 27	1.96575e-19	47.6876	-1.7531	-0.395612	0.00792024	-1.15329	-0.134753	-0.221415	-0.388038	-0.560775	-0.36949	-0.903946	-0.682933	-0.867279	-1.41986	-0.52099	-0.803467	-0.802899	-1.16719	-0.0403678	-1.18102	-1.18192	-0.508804	-0.654942	-0.765219	-1.15062	Uncharacterized protein	100145882	JEQ12_014801	GO:0042073,GO:0005929,GO:0005525,GO:0003924	intraciliary transport|cilium|GTP binding|GTPase activity								PF00071	Ras	Ras family	IPR027417,IPR034112,IPR005225,IPR001806	Homologous_superfamily|Family|Domain|Family
A0A6P3CWW1	JEQ12_003585	Calpain-2 catalytic subunit	79.9433	A0A6P3CWW1;A8IF71	JEQ12_003585;	Calpain-2 catalytic subunit	5.80019e-31	51.707	3.22017	3.40822	3.12298	3.18497	3.13066	3.24049	3.00491	3.19966	3.24815	3.04734	3.27313	3.17627	3.19323	3.29379	3.26335	3.08141	3.09409	3.25234	3.07093	3.27233	3.21642	3.22819	3.03342	3.20338	Calpain-2 catalytic subunit	100127211	JEQ12_003585	GO:0006508,GO:0005737,GO:0005886,GO:0005509,GO:0004198	proteolysis|cytoplasm|plasma membrane|calcium ion binding|calcium-dependent cysteine-type endopeptidase activity	oas04141,oas04210,oas04217,oas04218,oas04510,oas05010,oas05022	Protein processing in endoplasmic reticulum|Apoptosis|Necroptosis|Cellular senescence|Focal adhesion|Alzheimer disease|Pathways of neurodegeneration - multiple diseases	K03853					PF01067,PF13833,PF00648	Calpain_III|EF-hand_8|Peptidase_C2	Calpain large subunit, domain III|EF-hand domain pair|Calpain family cysteine protease	IPR033883,IPR022684,IPR022682,IPR022683,IPR036213,IPR011992,IPR018247,IPR002048,IPR042736,IPR038765,IPR000169,IPR001300	Domain|Family|Domain|Domain|Homologous_superfamily|Homologous_superfamily|Binding_site|Domain|Domain|Homologous_superfamily|Active_site|Domain
A0A6P3CWW6	JEQ12_009205	Ras-related GTP-binding protein	36.5661	A0A6P3CWW6;C5IJ87;W5PFQ8	JEQ12_009205;;RRAGA	Ras-related GTP-binding protein	1.79628e-16	46.4873	1.79192	1.891	1.70158	1.93312	2.02716	2.07062	1.70489	2.07254	2.11545	2.07047	1.99983	1.8283	1.86723	2.07663	1.95839	1.99772	1.55344	1.86827	1.80477	1.82427	1.86921	2.03421	2.08702	2.06941	Ras-related GTP-binding protein	100302067	JEQ12_009205	GO:0071230,GO:0032008,GO:0005764,GO:0005525	cellular response to amino acid stimulus|positive regulation of TOR signaling|lysosome|GTP binding	oas04150,oas04140	mTOR signaling pathway|Autophagy - animal	K16185					PF04670	Gtr1_RagA	Gtr1/RagA G protein conserved region	IPR006762,IPR027417,IPR039397	Family|Homologous_superfamily|Family
A0A6P3CWW7	JEQ12_019270	C2H2-type domain-containing protein	29.7569	A0A6P3CWW7;B2LU21	JEQ12_019270;SNAI2	C2H2-type domain-containing protein;Snai2	0.000402703	37.7441		-4.2051	-3.22583	-4.1122	-4.60654	-2.69946	-4.23448		-0.624011		-3.7663			-3.45781	-3.89102	-1.70469		-3.97606	-3.20571			-3.37223	-3.44787	-3.70793	C2H2-type domain-containing protein	100127220	JEQ12_019270			oas04390,oas04520	Hippo signaling pathway|Adherens junction	K05706					PF00096	zf-C2H2	Zinc finger, C2H2 type	IPR036236,IPR013087	Homologous_superfamily|Domain
A0A6P3CWW8	JEQ12_007718	Perilipin	55.2435	A0A6P3CWW8;B0FJL8	JEQ12_007718;	Perilipin	1.28005e-35	53.1859	1.96148	2.93223	1.96006	2.73609	1.66987	4.50006	0.527443	1.03552	1.20047	-0.541429	0.679346	3.64544	2.76308	3.46934	3.62635	2.29845	0.608063	1.08594	-0.400825	1.17306	0.575264	0.247624	1.46163	2.64133	Perilipin	100135431	JEQ12_007718	GO:0006629,GO:0005811	lipid metabolic process|lipid droplet	oas04371,oas04923,oas03320,oas04714	Apelin signaling pathway|Regulation of lipolysis in adipocytes|PPAR signaling pathway|Thermogenesis	K08768					PF03036	Perilipin	Perilipin family	IPR004279,IPR042998	Family|Family
A0A6P3CWX0	JEQ12_017623	Uncharacterized protein	24.7712	A0A6P3CWX0;B2MVW4	JEQ12_017623;RAB28	Uncharacterized protein;RAB28, member RAS oncogene family	9.20177e-20	47.8145	-1.55742	-1.46732	-1.87447	-1.64446	-1.67304	-1.65811	-1.84496	-1.54354	-1.54136	-1.54174	-1.425	-1.76546	-1.76984	-1.31216	-1.24911	-1.71053	-1.61668	-1.75579	-1.8172	-1.70699	-1.9013	-1.65542	-1.778	-1.51571	Uncharacterized protein	100147792	JEQ12_017623	GO:0005525,GO:0003924	GTP binding|GTPase activity								PF00071	Ras	Ras family	IPR027417,IPR005225,IPR001806	Homologous_superfamily|Domain|Family
A0A6P3CWX8	JEQ12_008876	Uncharacterized protein	62.3256	A0A6P3CWX8;C5ISB7;W5PGV7	JEQ12_008876;UBQLN1;UBQLN1	Uncharacterized protein;Ubiquilin 1;Ubiquilin 1	4.35282e-34	52.709	-0.0589606	-0.362582	-0.171738	-0.176624	-0.0518347	-0.152402	-0.0677023	-0.111174	-0.143862	0.0511854	0.0759744	-0.143328	-0.128723	-0.0591524	0.11035	-0.21932	0.0650686	-0.115924	-0.135163	-0.240702	-0.0286794	0.0423853	0.0802654	-0.0773527	Uncharacterized protein	100302096	JEQ12_008876			oas04141,oas05014	Protein processing in endoplasmic reticulum|Amyotrophic lateral sclerosis	K04523					PF00627,PF00240	UBA|ubiquitin	UBA/TS-N domain|Ubiquitin family	IPR006636,IPR015940,IPR009060,IPR015496,IPR000626,IPR029071	Domain|Domain|Homologous_superfamily|Family|Domain|Homologous_superfamily
A0A6P3CWZ0	JEQ12_015728	Uncharacterized protein	26.1724	A0A6P3CWZ0;B2LYK7;W5P9X2	JEQ12_015728;CHCHD3;CHCHD3	Uncharacterized protein;Coiled-coil-helix-coiled-coil-helix domain containing 3;Coiled-coil-helix-coiled-coil-helix domain containing 3	1.18999e-26	50.2711	2.28248	2.15116	2.2715	1.93705	2.01365	2.24038	2.16925	2.30913	2.3262	2.29771	2.39181	1.93334	2.08857	2.39108	2.22717	2.32451	2.27025	2.03935	2.23144	2.18905	2.3176	2.1941	2.07437	2.19638	Uncharacterized protein	100145872	JEQ12_015728	GO:0061617	MICOS complex								PF05300	MIC19_MIC25	MICOS complex subunit MIC19/MIC25	IPR007964	Family
A0A6P3CX02	JEQ12_008618	Ras-related protein Rab-7a	23.5158	A0A6P3CX02;B2LYK6	JEQ12_008618;RAB7A	Ras-related protein Rab-7a;RAB7A, member RAS oncogene family	1.84399e-34	52.8266	3.4597	3.49603	3.42822	3.74807	3.44736	3.75548	3.51306	3.56019	3.61409	3.55731	3.56279	3.58923	3.69024	3.72157	3.40712	3.58354	3.463	3.52869	3.86988	3.63395	3.51257	3.7535	3.68294	3.53445	Ras-related protein Rab-7a	100145880	JEQ12_008618	GO:0005525,GO:0003924	GTP binding|GTPase activity	oas04144,oas04145,oas04140,oas04137,oas05132,oas05152,oas05146	Endocytosis|Phagosome|Autophagy - animal|Mitophagy - animal|Salmonella infection|Tuberculosis|Amoebiasis	K07897					PF00071	Ras	Ras family	IPR027417,IPR005225,IPR001806	Homologous_superfamily|Domain|Family
A0A6P3CX08	JEQ12_019587	ADP/ATP translocase	32.8583	A0A6P3CX08;B2MVX0	JEQ12_019587;	ADP/ATP translocase	5.16306e-19	47.5248	-0.271353	-0.362768	-0.37695	-0.0741032	-0.499849	-0.22515	-0.100088	-0.22826	-0.26124	0.0061185	-0.642593	-0.910849	0.00792256	-0.841771	-0.381409	-0.3072	-0.52789	-0.440413	0.374863	-0.537077	-0.546723	-0.341547	-0.0674616	-0.32181	ADP/ATP translocase	100147789	JEQ12_019587	GO:0140021,GO:1990544,GO:0005743,GO:0005471	mitochondrial ADP transmembrane transport|mitochondrial ATP transmembrane transport|mitochondrial inner membrane|ATP:ADP antiporter activity	oas04020,oas04022,oas04217,oas04218,oas04613,oas05208,oas05166,oas05164,oas05010,oas05012,oas05016,oas05017,oas05020,oas05022,oas05415	Calcium signaling pathway|cGMP-PKG signaling pathway|Necroptosis|Cellular senescence|Neutrophil extracellular trap formation|Chemical carcinogenesis - reactive oxygen species|Human T-cell leukemia virus 1 infection|Influenza A|Alzheimer disease|Parkinson disease|Huntington disease|Spinocerebellar ataxia|Prion disease|Pathways of neurodegeneration - multiple diseases|Diabetic cardiomyopathy	K05863					PF00153	Mito_carr	Mitochondrial carrier protein	IPR002113,IPR002067,IPR018108,IPR023395	Family|Family|Repeat|Homologous_superfamily
A0A6P3CX09	JEQ12_009871	Tubulin alpha chain	49.9244	A0A6P3CX09;C5ISA2	JEQ12_009871;TUBA4A	Tubulin alpha chain	3.0262e-33	52.4427	6.58567	7.03301	6.78744	7.03255	6.70959	7.1103	6.80882	6.93782	6.66759	7.19888	7.00139	6.87275	7.36573	7.3169	7.01538	7.09456	6.84365	6.64209	6.94368	6.81222	6.92868	6.77509	6.967	6.87977	Tubulin alpha chain	100302357	JEQ12_009871	GO:0007017,GO:0005737,GO:0005874,GO:0005525,GO:0016787,GO:0005200	microtubule-based process|cytoplasm|microtubule|GTP binding|hydrolase activity|structural constituent of cytoskeleton	oas04145,oas04210,oas04530,oas04540,oas04814,oas05132,oas05010,oas05012,oas05014,oas05016,oas05020,oas05022	Phagosome|Apoptosis|Tight junction|Gap junction|Motor proteins|Salmonella infection|Alzheimer disease|Parkinson disease|Amyotrophic lateral sclerosis|Huntington disease|Prion disease|Pathways of neurodegeneration - multiple diseases	K07374					PF00091,PF03953	Tubulin|Tubulin_C	Tubulin/FtsZ family, GTPase domain|Tubulin C-terminal domain	IPR002452,IPR008280,IPR000217,IPR037103,IPR018316,IPR036525,IPR023123,IPR017975,IPR003008	Family|Homologous_superfamily|Family|Homologous_superfamily|Domain|Homologous_superfamily|Homologous_superfamily|Conserved_site|Domain
A0A6P3CX40	JEQ12_009709	Signal transducer and activator of transcription	87.0966	A0A6P3CX40;C8BKE1	JEQ12_009709;STAT1	Signal transducer and activator of transcription	1.81078e-24	49.5212	2.18194	2.28108	2.25274	2.37056	2.19406	2.41124	2.1898	2.55184	2.41948	2.46106	2.39621	2.34016	2.25939	2.28216	2.16	2.13585	2.54622	2.33673	2.14717	2.29956	2.23431	2.3407	2.34355	2.3579	Signal transducer and activator of transcription	100307049	JEQ12_009709	GO:0007165,GO:0005737,GO:0005634,GO:0003677,GO:0003700	signal transduction|cytoplasm|nucleus|DNA binding|DNA-binding transcription factor activity	oas04630,oas04217,oas04620,oas04621,oas04625,oas04658,oas04659,oas04062,oas04917,oas04935,oas04919,oas04380,oas05200,oas05235,oas05212,oas05161,oas05160,oas05171,oas05164,oas05162,oas05168,oas05167,oas05169,oas05165,oas05152,oas05145,oas05140,oas05321,oas04933	JAK-STAT signaling pathway|Necroptosis|Toll-like receptor signaling pathway|NOD-like receptor signaling pathway|C-type lectin receptor signaling pathway|Th1 and Th2 cell differentiation|Th17 cell differentiation|Chemokine signaling pathway|Prolactin signaling pathway|Growth hormone synthesis, secretion and action|Thyroid hormone signaling pathway|Osteoclast differentiation|Pathways in cancer|PD-L…	K11220					PF00017,PF12162,PF01017,PF02864,PF02865	SH2|STAT1_TAZ2bind|STAT_alpha|STAT_bind|STAT_int	SH2 domain|STAT1 TAZ2 binding domain|STAT protein, all-alpha domain|STAT protein, DNA binding domain|STAT protein, protein interaction domain	IPR008967,IPR000980,IPR036860,IPR001217,IPR038295,IPR035859,IPR022752,IPR036535,IPR013800,IPR015988,IPR013801,IPR012345,IPR013799	Homologous_superfamily|Domain|Homologous_superfamily|Family|Homologous_superfamily|Domain|Domain|Homologous_superfamily|Domain|Homologous_superfamily|Domain|Homologous_superfamily|Domain
A0A6P3CX48	JEQ12_002242	Ribosomal protein L23/L25 N-terminal domain-containing protein	17.6951	A0A6P3CX48;A0A836AMK4;D4P8H6	JEQ12_002242;JEQ12_009566;rpl23a	Ribosomal protein L23/L25 N-terminal domain-containing protein;Ribosomal protein L23/L25 N-terminal domain-containing protein;60S ribosomal protein L23a	7.89127e-26	49.9905	5.23646	5.4054	5.22529	5.24697	5.38959	5.46953	5.13335	5.12566	5.27397	5.43351	5.25847	5.08219	5.46291	5.19875	5.21269	5.27169	4.97272	5.0059	5.12506	5.23253	5.23178	5.33783	5.45884	5.35522	Ribosomal protein L23/L25 N-terminal domain-containing protein	100415774	JEQ12_002242	GO:0006412,GO:1990904,GO:0005840,GO:0019843,GO:0003735	translation|ribonucleoprotein complex|ribosome|rRNA binding|structural constituent of ribosome	oas03010,oas05171	Ribosome|Coronavirus disease - COVID-19	K02893					PF00276,PF03939	Ribosomal_L23|Ribosomal_L23eN	Ribosomal protein L23|Ribosomal protein L23, N-terminal domain	IPR012677,IPR019985,IPR012678,IPR001014,IPR005633,IPR013025	Homologous_superfamily|Family|Homologous_superfamily|Conserved_site|Domain|Family
A0A6P3CX64	JEQ12_012600	Claudin	22.2224	A0A6P3CX64;D6R6U1;W5QJA6	JEQ12_012600;;CLDN4	Claudin	3.82141e-08	42.8798	3.72004	2.58918	1.02255	-0.582502	3.90458	1.93448	0.951064	0.549763	3.79259	1.98969	2.61649	1.82331	3.23971	1.62238	-0.410563	3.4268	1.09898	0.422748	3.14028	3.54216	1.76736	2.58042	3.12426	2.75554	Claudin	780477	JEQ12_012600	GO:0005923,GO:0005886,GO:0005198	bicellular tight junction|plasma membrane|structural molecule activity	oas04514,oas04530,oas04670,oas05160	Cell adhesion molecules|Tight junction|Leukocyte transendothelial migration|Hepatitis C	K06087					PF00822	PMP22_Claudin	PMP-22/EMP/MP20/Claudin family	IPR006187,IPR003550,IPR017974,IPR004031	Family|Family|Conserved_site|Family
A0A6P3CX84		cAMP-dependent protein kinase regulatory subunit alpha 1	42.8927	A0A6P3CX84;A0A6P7EEY4;W5Q086	;JEQ12_002372;PRKAR1A	cAMP-dependent protein kinase regulatory subunit alpha 1;Cyclic nucleotide-binding domain-containing protein;Protein kinase cAMP-dependent type I regulatory subunit alpha	6.13063e-29	51.0392	2.32345	2.33733	2.20585	2.23031	2.23501	2.36796	2.33878	2.20705	2.35767	2.2931	2.38032	2.22643	2.06479	2.3213	2.18773	2.20107	2.3379	2.33733	2.3488	2.48712	2.45719	2.28841	2.0449	2.23516	cAMP-dependent protein kinase regulatory subunit alpha 1	100216463		GO:0016310,GO:0001932,GO:0005952,GO:0005737,GO:0005886,GO:0030552,GO:0008603,GO:0004674	phosphorylation|regulation of protein phosphorylation|cAMP-dependent protein kinase complex|cytoplasm|plasma membrane|cAMP binding|cAMP-dependent protein kinase regulator activity|protein serine/threonine kinase activity	oas04910	Insulin signaling pathway	K04739					PF00027,PF02197	cNMP_binding|RIIa	Cyclic nucleotide-binding domain|Regulatory subunit of type II PKA R-subunit	IPR012198,IPR003117,IPR018488,IPR000595,IPR018490,IPR014710	Family|Domain|Conserved_site|Domain|Homologous_superfamily|Homologous_superfamily
A0A6P3CX87	JEQ12_010299	Mitogen-activated protein kinase 14	41.2933	A0A6P3CX87;B7TJ15	JEQ12_010299;MAPK14	Mitogen-activated protein kinase 14	1.32869e-17	46.9594	2.06198	2.31596	2.08431	2.27219	2.09104	2.09528	2.17341	2.12252	2.41333	2.2981	2.21323	2.0452	2.11354	2.28734	2.27425	2.0426	2.14271	2.46248	2.022	2.24375	2.31436	2.47062	2.34037	2.30134	Mitogen-activated protein kinase 14	100217411	JEQ12_010299	GO:0038066,GO:0006468,GO:0005524,GO:0004707	p38MAPK cascade|protein phosphorylation|ATP binding|MAP kinase activity	oas04010,oas04015,oas04370,oas04668,oas04068,oas04071,oas04114,oas04218,oas04550,oas04611,oas04613,oas04620,oas04621,oas04622,oas04625,oas04660,oas04658,oas04659,oas04657,oas04664,oas04670,oas04912,oas04914,oas04917,oas04926,oas04935,oas04261,oas04728,oas04723,oas04722,oas04750,oas04380,oas04714,oas05205,oas05208,oas05235,oas05170,oas05161,oas05171,oas05163,oas05167,oas05169,oas05132,oas05135,oas…	MAPK signaling pathway|Rap1 signaling pathway|VEGF signaling pathway|TNF signaling pathway|FoxO signaling pathway|Sphingolipid signaling pathway|Oocyte meiosis|Cellular senescence|Signaling pathways regulating pluripotency of stem cells|Platelet activation|Neutrophil extracellular trap formation|Toll-like receptor signaling pathway|NOD-like receptor signaling pathway|RIG-I-like receptor signaling…	K04441					PF00069	Pkinase	Protein kinase domain	IPR011009,IPR003527,IPR008352,IPR038784,IPR000719,IPR017441	Homologous_superfamily|Conserved_site|Family|Family|Domain|Binding_site
A0A6P3CX96	JEQ12_012898	Uncharacterized protein	34.0254	A0A6P3CX96;B7U175	JEQ12_012898;CDC2	Uncharacterized protein;Cell division cycle 2 protein isoform 1	3.40508e-16	46.3682	-0.583671	-0.390335	-0.118151	-0.234448	-0.525949	-0.60444	-0.200405	-0.744394	-0.181397	-0.00888249	-0.43727	-0.652101	-0.328511	-0.342854	-0.378304	-0.52948	-0.378923	-0.203763	-0.233473	-1.35412	-0.362568	-0.295583	-0.55173	-0.425188	Uncharacterized protein	100216432	JEQ12_012898	GO:0006468,GO:0005524,GO:0004674	protein phosphorylation|ATP binding|protein serine/threonine kinase activity	oas04110,oas04114,oas04115,oas04218,oas04540,oas04914,oas05203,oas05170	Cell cycle|Oocyte meiosis|p53 signaling pathway|Cellular senescence|Gap junction|Progesterone-mediated oocyte maturation|Viral carcinogenesis|Human immunodeficiency virus 1 infection	K02087					PF00069	Pkinase	Protein kinase domain	IPR011009,IPR000719,IPR017441,IPR008271	Homologous_superfamily|Domain|Binding_site|Active_site
A0A6P3CXB5	JEQ12_014699	Phosphate carrier protein, mitochondrial	39.9907	A0A6P3CXB5;B7U168;W5PTW2	JEQ12_014699;SLC25A3;SLC25A3	Phosphate carrier protein, mitochondrial;Phosphate carrier protein, mitochondrial;Phosphate carrier protein, mitochondrial	2.42167e-25	49.8241	3.95492	3.82988	4.00589	3.86778	4.04528	4.00387	4.23923	3.87799	3.99973	3.95299	3.98074	3.90443	3.97955	3.9871	3.98641	4.16692	4.09881	3.98123	3.99255	3.88387	4.12034	4.09415	4.11775	4.153	Phosphate carrier protein, mitochondrial	100217412	JEQ12_014699	GO:1990547,GO:0005743,GO:0005315,GO:0015293	mitochondrial phosphate ion transmembrane transport|mitochondrial inner membrane|inorganic phosphate transmembrane transporter activity|symporter activity								PF00153	Mito_carr	Mitochondrial carrier protein	IPR018108,IPR023395,IPR044677	Repeat|Homologous_superfamily|Family
A0A6P3CXG2	FOXO3	Forkhead box O3	70.9483	A0A6P3CXG2;A0A836ABL3	FOXO3;JEQ12_018729	Forkhead box O3;Fork-head domain-containing protein	1.02782e-05	41.0838	-1.08032	-0.510688	-0.953834	-0.796234	-0.78061	-1.10477	-0.975471	-0.722191	-1.19605	-0.692983	-0.894004	-1.20541	-1.43291	-1.12796	-1.28241	-1.26348	-1.07984	-1.52901	-1.27868	-1.12152	-1.43636	-1.08983	-1.14743	-1.24631	Forkhead box O3	100913151	FOXO3	GO:0005737,GO:0005634,GO:0003700,GO:0043565	cytoplasm|nucleus|DNA-binding transcription factor activity|sequence-specific DNA binding	oas04068,oas04151,oas04152,oas04137,oas04218,oas04062,oas04917,oas04722,oas04211,oas04213,oas05208,oas05213,oas05223,oas04936,oas01521	FoxO signaling pathway|PI3K-Akt signaling pathway|AMPK signaling pathway|Mitophagy - animal|Cellular senescence|Chemokine signaling pathway|Prolactin signaling pathway|Neurotrophin signaling pathway|Longevity regulating pathway|Longevity regulating pathway - multiple species|Chemical carcinogenesis - reactive oxygen species|Endometrial cancer|Non-small cell lung cancer|Alcoholic liver disease|EGF…	K09408					PF00250,PF16676,PF16675	Forkhead|FOXO-TAD|FOXO_KIX_bdg	Forkhead domain|Transactivation domain of FOXO protein family|KIX-binding domain of forkhead box O, CR2	IPR001766,IPR032067,IPR032068,IPR030456,IPR036388,IPR036390	Domain|Domain|Domain|Conserved_site|Homologous_superfamily|Homologous_superfamily
A0A6P3CXG5		Ras-related protein Rab-4	24.3926	A0A6P3CXG5		Ras-related protein Rab-4	4.48052e-21	48.3075	-0.109461	-0.322466	-0.447929	-0.717881	-0.479076	-0.383346	-0.807572	-0.409787	-0.36299	-0.328852	-0.545761	-0.397102	-0.522032	-0.829947	-0.156299	-0.449005	-0.89824	-0.653169	-0.201385	-0.0923612	-0.799153	-0.305951	-0.142421	-0.509404	Ras-related protein Rab-4	100302066		GO:0015031,GO:0032482,GO:0030100,GO:0030659,GO:0005768,GO:0005886,GO:0003925,GO:0005525	protein transport|Rab protein signal transduction|regulation of endocytosis|cytoplasmic vesicle membrane|endosome|plasma membrane|G protein activity|GTP binding	oas04144	Endocytosis	K07879					PF00071	Ras	Ras family	IPR027417,IPR041819,IPR005225,IPR001806	Homologous_superfamily|Family|Domain|Family
A0A6P3CXJ6	PPIL3	Peptidyl-prolyl cis-trans isomerase	18.1275	A0A6P3CXJ6	PPIL3	Peptidyl-prolyl cis-trans isomerase	1.5223e-31	51.896	0.601587	0.352479	0.464417	0.587407	-0.0380816	0.697571	1.08882	-0.0210673	1.02026	0.283121	1.16705	1.01958	0.657088	0.612592	0.815987	0.866405	0.515715	0.248877	0.527829	1.02534	1.02604	1.14864	0.671486	0.92412	Peptidyl-prolyl cis-trans isomerase	100302351	PPIL3	GO:0006457,GO:0000413,GO:0008380,GO:0005681,GO:0003755	protein folding|protein peptidyl-prolyl isomerization|RNA splicing|spliceosomal complex|peptidyl-prolyl cis-trans isomerase activity								PF00160	Pro_isomerase	Cyclophilin type peptidyl-prolyl cis-trans isomerase/CLD	IPR029000,IPR024936,IPR020892,IPR002130,IPR044666	Homologous_superfamily|Family|Conserved_site|Domain|Family
A0A6P3CXL7	JEQ12_007749	40S ribosomal protein S17	15.5241	A0A6P3CXL7;K4P486;W5PVR4	JEQ12_007749;RPS17;RPS17	40S ribosomal protein S17	7.27407e-34	52.6384	3.88813	3.89563	4.03205	4.16901	4.14291	4.04382	4.058	3.92715	4.15351	4.1224	3.78456	4.09869	4.17407	4.07082	3.90722	3.98489	4.06489	3.92331	4.14435	3.90032	4.12683	4.04939	4.11246	3.98053	40S ribosomal protein S17	101109830	JEQ12_007749	GO:0006412,GO:1990904,GO:0005840,GO:0003735	translation|ribonucleoprotein complex|ribosome|structural constituent of ribosome	oas03010,oas05171	Ribosome|Coronavirus disease - COVID-19	K02962					PF00833	Ribosomal_S17e	Ribosomal S17	IPR001210,IPR018273,IPR036401	Family|Conserved_site|Homologous_superfamily
A0A6P3CXM0	JEQ12_000254	40S ribosomal protein S8	24.2052	A0A6P3CXM0;K4P1S8;W5NSP2	JEQ12_000254;RPS8;RPS8	40S ribosomal protein S8	2.60268e-19	47.6405	3.63169	3.64058	3.80952	4.00463	3.72675	4.04508	3.64099	3.61669	3.45929	3.62661	3.74013	3.73019	4.09169	3.95151	3.68419	3.88792	3.61496	3.49486	3.6292	3.51134	3.43442	3.79757	3.93184	3.76445	40S ribosomal protein S8	101117800	JEQ12_000254	GO:0006412,GO:1990904,GO:0005840,GO:0003735	translation|ribonucleoprotein complex|ribosome|structural constituent of ribosome	oas03010,oas05171	Ribosome|Coronavirus disease - COVID-19	K02995					PF01201	Ribosomal_S8e	Ribosomal protein S8e	IPR042563,IPR001047,IPR022309,IPR018283	Homologous_superfamily|Family|Family|Conserved_site
A0A6P3CXM2	ARAF	non-specific serine/threonine protein kinase	67.6903	A0A6P3CXM2	ARAF	non-specific serine/threonine protein kinase	2.94294e-09	43.386	0.616741	0.187796	0.180803	0.359972	0.558314	0.509563	0.272074	0.325906	0.470764	0.423129	0.364876	0.28399	0.366368	0.279903	0.331281	0.402816	0.329219	0.347374	0.20617	0.427299	0.500411	0.447027	0.558206	0.412915	non-specific serine/threonine protein kinase	100305131	ARAF	GO:0006468,GO:0007165,GO:0005524,GO:0004674	protein phosphorylation|signal transduction|ATP binding|protein serine/threonine kinase activity	oas04010,oas04012,oas04068,oas04810,oas04650,oas04910,oas04914,oas04928,oas04270,oas04726,oas04720,oas04730,oas05200,oas05205,oas05208,oas05210,oas05212,oas05225,oas05226,oas05214,oas05221,oas05220,oas05218,oas05211,oas05219,oas05215,oas05213,oas05224,oas05223,oas05161,oas05160,oas05010,oas05022,oas05034,oas01521,oas01522	MAPK signaling pathway|ErbB signaling pathway|FoxO signaling pathway|Regulation of actin cytoskeleton|Natural killer cell mediated cytotoxicity|Insulin signaling pathway|Progesterone-mediated oocyte maturation|Parathyroid hormone synthesis, secretion and action|Vascular smooth muscle contraction|Serotonergic synapse|Long-term potentiation|Long-term depression|Pathways in cancer|Proteoglycans in c…	K08845					PF00130,PF07714,PF02196	C1_1|PK_Tyr_Ser-Thr|RBD	Phorbol esters/diacylglycerol binding domain (C1 domain)|Protein tyrosine and serine/threonine kinase|Raf-like Ras-binding domain	IPR046349,IPR020454,IPR011009,IPR002219,IPR000719,IPR017441,IPR003116,IPR001245,IPR008271,IPR029071	Homologous_superfamily|Domain|Homologous_superfamily|Domain|Domain|Binding_site|Domain|Domain|Active_site|Homologous_superfamily
A0A6P3CXN5	JEQ12_014771	NTR domain-containing protein	24.1309	A0A6P3CXN5;C8BKC2	JEQ12_014771;TIMP3	NTR domain-containing protein;Metallopeptidase inhibitor 3	1.79052e-23	49.1728	-0.302842	-0.529259	-0.601619	-0.286663	0.166383	-0.471662	-0.272209	-0.679127	-0.585311	-0.81659	0.0288064	-1.32809	-0.619451	-0.823221	-1.26095	-0.0417121	-0.568162	-1.28492	-0.892978	-0.467353	-0.0437356	-0.845584	-0.238461	-0.619629	NTR domain-containing protein	100217407	JEQ12_014771	GO:0010466,GO:0005576,GO:0046872,GO:0008191	negative regulation of peptidase activity|extracellular region|metal ion binding|metalloendopeptidase inhibitor activity	oas05206,oas05205	MicroRNAs in cancer|Proteoglycans in cancer	K16866					PF00965	TIMP	Tissue inhibitor of metalloproteinase	IPR001134,IPR001820,IPR008993,IPR027465,IPR030490	Domain|Family|Homologous_superfamily|Homologous_superfamily|Conserved_site
A0A6P3CXP0	JEQ12_002477	Globin family profile domain-containing protein	21.4166	A0A6P3CXP0;C8BKE0	JEQ12_002477;CYGB	Globin family profile domain-containing protein;Cytoglobin	4.3464e-18	47.1568	0.870486	1.53288	0.679724	0.826796	0.485344	0.549385	0.392618	0.686408	0.829586	0.612577	0.464867	0.824634	0.35445	0.64118	1.06496	0.0392756	0.580682	0.997776	0.0841791	0.793842	0.242077	0.404624	0.482388	0.563044	Globin family profile domain-containing protein	100307038	JEQ12_002477	GO:0020037,GO:0005506,GO:0019825,GO:0005344	heme binding|iron ion binding|oxygen binding|oxygen carrier activity								PF00042	Globin	Globin	IPR000971,IPR009050,IPR012292,IPR013314	Domain|Homologous_superfamily|Homologous_superfamily|Family
A0A6P3CXP3	SPARC	SPARC	34.5982	A0A6P3CXP3;A0A6P3TLP4;W5PGY0	SPARC;JEQ12_016989;SPARC	SPARC	1.00399e-39	54.4217	1.64749	2.5237	2.12649	2.07089	1.93801	1.71368	1.90099	2.17268	2.6503	2.57538	1.82712	2.19944	2.33435	1.89349	2.02369	2.02241	2.33758	1.82241	2.36672	2.29383	1.96067	1.90378	1.83316	2.02173	SPARC	100307048	SPARC	GO:0005604,GO:0005615,GO:0016020,GO:0005509	basement membrane|extracellular space|membrane|calcium ion binding								PF09289,PF00050,PF10591	FOLN|Kazal_1|SPARC_Ca_bdg	Follistatin/Osteonectin-like EGF domain|Kazal-type serine protease inhibitor domain|Secreted protein acidic and rich in cysteine Ca binding region	IPR011992,IPR018247,IPR003645,IPR015369,IPR002350,IPR036058,IPR001999,IPR019577	Homologous_superfamily|Binding_site|Domain|Domain|Domain|Homologous_superfamily|Conserved_site|Domain
A0A6P3CXR7	JEQ12_001492	Claudin	22.865	A0A6P3CXR7;D6R6U0	JEQ12_001492;CLDN1	Claudin	1.4213e-18	47.3513	1.73896	1.54091	1.92358	2.33078	2.31027	2.49977	1.74882	1.75235	1.6475	1.65615	1.95524	1.83146	2.24349	2.29283	2.16248	2.26888	1.76717	1.9671	1.71836	1.71246	1.9413	1.96794	2.22119	2.11145	Claudin	780473	JEQ12_001492	GO:0005923,GO:0005886,GO:0005198	bicellular tight junction|plasma membrane|structural molecule activity	oas04514,oas04530,oas04670,oas05160	Cell adhesion molecules|Tight junction|Leukocyte transendothelial migration|Hepatitis C	K06087					PF00822	PMP22_Claudin	PMP-22/EMP/MP20/Claudin family	IPR006187,IPR003548,IPR017974,IPR004031	Family|Family|Conserved_site|Family
A0A6P3CXU7	JEQ12_014266	DIX domain-containing protein	37.5451	A0A6P3CXU7;E5LFF4	JEQ12_014266;C3H12orf29	DIX domain-containing protein;Chromosome 3 C12orf29 homolog	5.80934e-06	41.3767	-3.42823	-2.41347	-2.18785	-2.75528	-2.98042	-2.90342	-2.20128	-1.50997	-2.6519	-1.58791	-1.53705	-2.37678	-1.72887	-1.99446	-2.12957	-1.9011	-3.29795	-2.4853	-2.23326	-2.18262	-3.22066	-2.2972	-1.97617	-1.45994	DIX domain-containing protein	100528013	JEQ12_014266										PF17720	DUF5565	Family of unknown function (DUF5565)	IPR041211	Family
A0A6P3CY24	JEQ12_003881	Peroxiredoxin-6	25.0669	A0A6P3CY24;M4T8F1	JEQ12_003881;Prdx6	Peroxiredoxin-6	5.58524e-26	50.0423	6.50615	6.30607	6.25697	6.31927	6.41854	6.71983	6.24673	6.58296	6.74557	6.32411	6.61022	6.46735	6.55444	6.63161	6.5366	6.45137	6.4593	6.52939	6.29737	6.47129	6.43042	6.39497	6.41819	6.56632	Peroxiredoxin-6	101112748	JEQ12_003881	GO:0016042,GO:0051920	lipid catabolic process|peroxiredoxin activity	oas00480	Glutathione metabolism	K11188					PF10417,PF00578	1-cysPrx_C|AhpC-TSA	C-terminal domain of 1-Cys peroxiredoxin|AhpC/TSA family	IPR000866,IPR024706,IPR019479,IPR045020,IPR036249,IPR013766	Domain|Family|Domain|Family|Homologous_superfamily|Domain
A0A6P3CY35	JEQ12_014357	Uncharacterized protein	57.3606	A0A6P3CY35;G3ER51	JEQ12_014357;KRT71	Uncharacterized protein;Keratin 71	8.55004e-41	54.7336	7.96197	8.14732	8.33712	8.43091	8.3839	8.328	8.03288	8.41039	7.96779	8.50321	8.26866	8.07742	8.39778	8.3536	8.35935	8.30577	8.25741	8.27385	8.16916	8.15863	8.02104	8.37465	8.30829	8.49413	Uncharacterized protein	101112045	JEQ12_014357	GO:0045095	keratin filament								PF00038,PF16208	Filament|Keratin_2_head	Intermediate filament protein|Keratin type II head	IPR018039,IPR039008,IPR032444,IPR003054	Conserved_site|Domain|Domain|Family
A0A6P3CY59	LYPLA1	palmitoyl-protein hydrolase	24.6257	A0A6P3CY59;A0A6P7E7Q5;W5PX34	LYPLA1;JEQ12_017290;LYPLA1	palmitoyl-protein hydrolase	8.16505e-20	47.8344	3.80669	3.4745	3.73254	4.20884	3.80632	4.2343	3.82898	3.48843	3.90761	3.87735	4.02419	4.12667	4.39204	3.90036	3.96354	3.88608	3.97774	3.88354	4.05817	3.71606	3.95586	4.09386	4.26916	3.84438	palmitoyl-protein hydrolase	101107971	LYPLA1	GO:0004622,GO:0102545	lysophospholipase activity|phosphatidyl phospholipase B activity	oas00564,oas05231	Glycerophospholipid metabolism|Choline metabolism in cancer	K06128					PF02230	Abhydrolase_2	Phospholipase/Carboxylesterase	IPR029058,IPR003140	Homologous_superfamily|Domain
A0A6P3CY62	RETN	Resistin	11.5485	A0A6P3CY62;W5NW78	RETN	Resistin	1.76422e-34	52.8328	1.50962	0.498756	-0.489972	-0.432363	-1.07096	-2.13297	0.507103	0.340624	-1.45902	-0.209753	-0.765754	0.598854	1.74477	-0.527201	0.208906	0.272455	-0.25827	-0.172099	0.00604192	1.15944	-1.87992	0.904524	1.45083	0.530878	Resistin	101122857	RETN	GO:0005576,GO:0005179	extracellular region|hormone activity								PF06954	Resistin	Resistin	IPR009714,IPR036262	Family|Homologous_superfamily
A0A6P3CYD5	JEQ12_012524	Uncharacterized protein	11.918	A0A6P3CYD5	JEQ12_012524	Uncharacterized protein	0.00125333	35.1943	-1.08911			-1.19642	-1.11933			-1.60118	-1.62161	-2.16716	-2.00564	-0.839569	-2.08274	-1.12337	-2.0889	-0.988288	-1.58687	-0.94151	-1.6452	-0.974961	-0.974976	-2.02865	-1.17861	-1.98918	Uncharacterized protein	101101946	JEQ12_012524	GO:0016020	membrane								PF04505	CD225	Interferon-induced transmembrane protein	IPR007593	Family
A0A6P3DY27	JEQ12_000142	Uncharacterized protein	43.1757	A0A6P3DY27;W5QEL4	JEQ12_000142;OSCP1	Uncharacterized protein;Organic solute carrier partner 1	2.14642e-07	42.4771	-2.04864	-1.14696	-1.00805	-0.913098	-1.551	-0.706559	-0.948464	-1.29386	-1.27708	-0.999648	-1.18801	-0.973382	-0.867936	-1.16968	-1.37148	-1.04594	-1.18457	-1.10582	-1.27923	-1.44105	-1.55984	-1.374	-0.829858	-1.20627	Uncharacterized protein	101113543	JEQ12_000142										PF10188	Oscp1	Organic solute transport protein 1	IPR019332	Family
A0A6P3DY87	JEQ12_000320	Uncharacterized protein	17.4437	A0A6P3DY87;W5P2W3	JEQ12_000320;RNF11	Uncharacterized protein;Ring finger protein 11	0.00246381	31.7054		-2.86525	-3.35816	-4.61987	-3.60915	-3.26047	-1.60337	-2.28901	-4.1913	-1.96855	-2.99114	-2.65627	-1.60363	-2.95254	-2.78445	-4.01778			-2.43511		-2.3803	-2.89581	-1.81099	-1.72316	Uncharacterized protein	101109924	JEQ12_000320										PF13639	zf-RING_2	Ring finger domain	IPR042981,IPR001841,IPR013083	Domain|Domain|Homologous_superfamily
A0A6P3DY98	JEQ12_000334	Pre-mRNA-splicing factor 38A	37.4765	A0A6P3DY98;W5P5R7	JEQ12_000334;PRPF38A	Pre-mRNA-splicing factor 38A	1.92094e-35	53.1315	0.0213397	-0.427962	-0.262176	0.00614347	-0.0171601	-0.0787713	-0.350907	-0.207528	-0.0944557	-0.475526	-0.0938478	-0.160629	-0.222825	-0.123188	-0.140057	0.0871799	-0.448037	-0.362498	0.0172044	-0.0230442	-0.17434	-0.00950768	-0.102492	-0.332987	Pre-mRNA-splicing factor 38A	101115326	JEQ12_000334	GO:0000398,GO:0071005	mRNA splicing, via spliceosome|U2-type precatalytic spliceosome	oas03040	Spliceosome	K12849					PF03371,PF12871	PRP38|PRP38_assoc	PRP38 family|Pre-mRNA-splicing factor 38-associated hydrophilic C-term	IPR005037,IPR024767	Family|Domain
A0A6P3DYB3	JEQ12_000378	Uncharacterized protein	60.1954	A0A6P3DYB3	JEQ12_000378	Uncharacterized protein	2.85907e-26	50.1414	0.936484	1.14434	2.36668	1.65727	1.99806	0.990751	1.73752	1.44087	1.28232	1.32972	1.91102	2.35695	1.39358	1.6574	1.53147	1.83932	1.38932	1.43949	1.05278	0.714249	1.31022	1.96499	2.28323	1.90068	Uncharacterized protein	101123162	JEQ12_000378	GO:0050614,GO:0071949	delta24-sterol reductase activity|FAD binding	oas00100	Steroid biosynthesis	K09828					PF01565	FAD_binding_4	FAD binding domain	IPR040165,IPR016166,IPR036318,IPR016169,IPR006094	Family|Domain|Homologous_superfamily|Homologous_superfamily|Domain
A0A6P3DYE1	JEQ12_000443	Uncharacterized protein	62.2543	A0A6P3DYE1;W5PP24	JEQ12_000443;WLS	Uncharacterized protein;Wnt ligand secretion mediator	4.54406e-31	51.7416	0.039426	0.162193	0.0729147	0.0440417	0.151958	0.0697418	0.0746556	0.316492	0.445462	0.366034	-0.0765493	0.239174	0.56356	-0.0419756	0.20864	0.293141	-0.0127249	-0.0270369	0.203666	0.0973615	0.181104	0.381735	0.300601	0.319936	Uncharacterized protein	101116103	JEQ12_000443	GO:0016055,GO:0000139,GO:0017147	Wnt signaling pathway|Golgi membrane|Wnt-protein binding								PF06664	MIG-14_Wnt-bd	Wnt-binding factor required for Wnt secretion	IPR009551	Family
A0A6P3DYE5	JEQ12_000448	Uncharacterized protein	61.0765	A0A6P3DYE5;W5PQP1	JEQ12_000448;ANKRD13C	Uncharacterized protein;Ankyrin repeat domain 13C	0.00297328	30.503							-5.40051				-5.34949			-5.92984	-4.61389	-5.96365						-4.83944	-5.9199	-5.29057	Uncharacterized protein	101118233	JEQ12_000448	GO:0016020	membrane								PF12796,PF11904	Ank_2|GPCR_chapero_1	Ankyrin repeats (3 copies)|GPCR-chaperone	IPR021832,IPR002110,IPR036770	Family|Repeat|Homologous_superfamily
A0A6P3DYF0	JEQ12_000460	Enoyl reductase (ER) domain-containing protein	35.2938	A0A6P3DYF0;W5PSF8	JEQ12_000460;CRYZ	Enoyl reductase (ER) domain-containing protein;Crystallin zeta	3.43556e-34	52.7414	3.2988	3.46055	3.56205	3.31362	3.3032	3.58714	3.59756	3.65564	3.3923	3.05008	3.61969	3.56966	3.29759	3.27199	2.8907	2.98743	2.93555	3.22982	3.49694	3.30208	3.63346	3.0258	3.4297	3.15821	Enoyl reductase (ER) domain-containing protein	101120615	JEQ12_000460	GO:0016491,GO:0008270	oxidoreductase activity|zinc ion binding								PF08240,PF00107	ADH_N|ADH_zinc_N	Alcohol dehydrogenase GroES-like domain|Zinc-binding dehydrogenase	IPR013149,IPR013154,IPR011032,IPR036291,IPR020843,IPR002364	Domain|Domain|Homologous_superfamily|Homologous_superfamily|Domain|Conserved_site
A0A6P3DYI0	LMO4	LIM domain only 4	17.9937	A0A6P3DYI0;A0A6P3E449	LMO4;JEQ12_000521	LIM domain only 4;LIM zinc-binding domain-containing protein	4.05376e-17	46.7594	-0.353076	-0.415967	0.246941	0.0276913	-0.169427	0.217206	-0.236301	0.131464	-0.00430135	0.267272	0.134875	-0.085624	-0.217935	-0.219544	0.064545	0.036674	-0.237207	0.166217	-0.618441	0.227794	-0.0209528	-0.00591329	0.108782	-0.0992423	LIM domain only 4	101118065	LMO4						KOG0490	K	DNA binding	Transcription	PF00412	LIM	LIM domain	IPR001781	Domain
A0A6P3DYI4	JEQ12_000534	Uncharacterized protein	71.0652	A0A6P3DYI4;W5Q1G8	JEQ12_000534;GBP6	Uncharacterized protein;Guanylate binding protein family member 6	1.1432e-24	49.5906	0.543364	0.488442	0.357296	-0.243713	0.0446273	0.390524	0.232282	0.404984	0.297599	0.319233	0.341963	-0.377855	-0.437591	0.193183	0.158132	-0.200742	0.570311	0.55638	-0.186804	0.42662	-0.166602	0.239581	0.0830778	0.215392	Uncharacterized protein	101120875	JEQ12_000534	GO:0050896,GO:0005525,GO:0003924	response to stimulus|GTP binding|GTPase activity								PF02263,PF02841	GBP|GBP_C	Guanylate-binding protein, N-terminal domain|Guanylate-binding protein, C-terminal domain	IPR030386,IPR037684,IPR003191,IPR036543,IPR015894,IPR027417	Domain|Domain|Domain|Homologous_superfamily|Domain|Homologous_superfamily
A0A6P3DYJ2	JEQ12_000059	Uncharacterized protein	18.1244	A0A6P3DYJ2;W5NQ13	JEQ12_000059;TWIST2	Uncharacterized protein;Twist family bHLH transcription factor 2	3.81931e-26	50.0983	-2.48634	-3.31565	-2.09928	-2.46217	-2.00549	-1.78117	-1.99654	-1.38496	-2.36131	-2.15943	-1.92992	-2.53703	-2.55732	-1.99361	-2.29271	-2.06802	-2.14817	-1.93709	-2.59596	-1.94625	-1.96311	-2.08823	-1.58787	-1.58009	Uncharacterized protein	101122639	JEQ12_000059	GO:0046983,GO:0000977	protein dimerization activity|RNA polymerase II transcription regulatory region sequence-specific DNA binding	oas05205	Proteoglycans in cancer	K09069					PF00010	HLH	Helix-loop-helix DNA-binding domain	IPR011598,IPR036638	Domain|Homologous_superfamily
A0A6P3DYJ8	JEQ12_000570	TLC domain-containing protein	30.1196	A0A6P3DYJ8;A0A6P3TRA7	JEQ12_000570;LOC101108787	TLC domain-containing protein;Transmembrane protein 56	2.30861e-07	42.4583	-0.239226	0.145172	0.563153	0.492503	0.242584	0.220497	0.947088	-0.0912838	-0.291908	0.0776999	-0.366332	0.0439554	0.371905	-0.0342722	0.74106	1.1504	0.41674	0.0989412	0.352665	-0.130887	0.0375689	0.109493	0.829873	0.519318	TLC domain-containing protein	101108787	JEQ12_000570	GO:0016020	membrane								PF03798	TRAM_LAG1_CLN8	TLC domain	IPR006634	Domain
A0A6P3DYK1	JEQ12_000127	Proteasome subunit beta	22.8963	A0A6P3DYK1	JEQ12_000127	Proteasome subunit beta	5.55179e-21	48.2731	2.45468	2.42456	2.17595	2.25062	2.22106	2.28385	2.31702	2.19753	2.00441	2.19646	2.29632	2.34349	2.3203	2.19075	2.2353	2.22998	2.10296	2.06603	2.25883	2.17783	2.3583	2.03052	2.20887	2.28281	Proteasome subunit beta	101110188	JEQ12_000127	GO:0010498,GO:0005737,GO:0005634,GO:0005839	proteasomal protein catabolic process|cytoplasm|nucleus|proteasome core complex	oas03050,oas05010,oas05012,oas05014,oas05016,oas05017,oas05020,oas05022	Proteasome|Alzheimer disease|Parkinson disease|Amyotrophic lateral sclerosis|Huntington disease|Spinocerebellar ataxia|Prion disease|Pathways of neurodegeneration - multiple diseases	K02734					PF00227	Proteasome	Proteasome subunit	IPR029055,IPR035206,IPR016050,IPR001353,IPR023333	Homologous_superfamily|Family|Conserved_site|Family|Family
A0A6P3DYK8	JEQ12_000150	Uncharacterized protein	45.6613	A0A6P3DYK8;W5QET3	JEQ12_000150;SNIP1	Uncharacterized protein;Smad nuclear interacting protein 1	3.78208e-33	52.4119	0.158839	0.337689	0.622599	0.237397	0.444864	0.321434	0.25176	0.115377	0.0937521	0.309097	0.172682	0.221366	0.421866	0.178489	0.600598	0.0933445	0.230755	0.181428	-0.0911632	0.38788	0.303606	0.264183	0.183293	0.271675	Uncharacterized protein	101114317	JEQ12_000150										PF00498	FHA	FHA domain	IPR000253,IPR008984	Domain|Homologous_superfamily
A0A6P3DYL3	JEQ12_000161	Uncharacterized protein	58.9059	A0A6P3DYL3;W5QFB8	JEQ12_000161;SF3A3	Uncharacterized protein;Splicing factor 3a subunit 3	1.76785e-14	45.6031	2.19929	2.25665	2.15087	2.09438	2.25405	2.267	2.18992	1.94235	2.18063	2.09779	1.98359	2.24122	2.41483	2.15909	2.2759	2.51424	2.22944	2.09329	2.42934	2.18213	2.35306	2.3978	2.30222	1.94362	Uncharacterized protein	101116775	JEQ12_000161	GO:0000398,GO:0005681,GO:0003723,GO:0008270	mRNA splicing, via spliceosome|spliceosomal complex|RNA binding|zinc ion binding	oas03040	Spliceosome	K12827					PF13297,PF16837,PF12108,PF11931	SDE2_2C|SF3A3|SF3a60_bindingd|SF3a60_Prp9_C	Replication stress response SDE2 C-terminal|Pre-mRNA-splicing factor SF3A3, of SF3a complex, Prp9|Splicing factor SF3a60 binding domain|SF3a60/Prp9 C-terminal	IPR000690,IPR031774,IPR024598,IPR021966	Domain|Domain|Domain|Domain
A0A6P3DYP6	CEPT1	Choline/ethanolamine phosphotransferase 1	46.4504	A0A6P3DYP6;W5QDZ0	CEPT1	Choline/ethanolamine phosphotransferase 1	0.000552205	37.2016	1.26515	1.37684	1.66426	1.54881	1.60239	1.52971	1.7362	1.57781	1.80003	1.6454	1.5543	1.2649	1.62543	1.20284	1.34245	1.44744	1.63041	1.62697	1.2586	1.32467	1.47414	1.73818	1.53625	1.70739	Choline/ethanolamine phosphotransferase 1	101112775	CEPT1	GO:0008654,GO:0016020,GO:0016780	phospholipid biosynthetic process|membrane|phosphotransferase activity, for other substituted phosphate groups	oas00564,oas00565,oas00440	Glycerophospholipid metabolism|Ether lipid metabolism|Phosphonate and phosphinate metabolism	K13644	KOG2877	I	Belongs to the CDP-alcohol phosphatidyltransferase class-I family	Lipid transport and metabolism	PF01066	CDP-OH_P_transf	CDP-alcohol phosphatidyltransferase	IPR000462,IPR043130,IPR014472	Family|Homologous_superfamily|Family
A0A6P3DYQ1	JEQ12_000672	ATP synthase subunit b	28.8066	A0A6P3DYQ1;A0A8V6WHY3	JEQ12_000672;ATP5PB	ATP synthase subunit b	4.86862e-35	53.0071	4.02665	4.31838	4.22278	4.28031	4.15664	4.30262	4.38509	4.3476	4.01245	4.40658	4.47829	4.34924	4.18337	4.26981	4.31775	4.21045	4.19388	4.38884	4.07522	4.12135	4.39629	4.24172	4.26154	4.46191	ATP synthase subunit b	101114570	JEQ12_000672	GO:0015986,GO:0000276,GO:0015078	proton motive force-driven ATP synthesis|mitochondrial proton-transporting ATP synthase complex, coupling factor F(o)|proton transmembrane transporter activity	oas00190,oas04714,oas05208,oas05010,oas05012,oas05014,oas05016,oas05020,oas05022,oas05415	Oxidative phosphorylation|Thermogenesis|Chemical carcinogenesis - reactive oxygen species|Alzheimer disease|Parkinson disease|Amyotrophic lateral sclerosis|Huntington disease|Prion disease|Pathways of neurodegeneration - multiple diseases|Diabetic cardiomyopathy	K02127					PF05405	Mt_ATP-synt_B	Mitochondrial ATP synthase B chain precursor (ATP-synt_B)	IPR008688,IPR013837	Family|Family
A0A6P3DYR4	JEQ12_000694	Uncharacterized protein	17.6599	A0A6P3DYR4;W5QF93	JEQ12_000694;BCL2L15	Uncharacterized protein;BCL2 like 15	2.05933e-37	53.7336	0.29947	-0.00620375	-1.10243	-0.709051	-1.69275	-0.404302	-0.912039	-0.0495502	-1.15588	0.121945	-0.535422	-0.433007	0.128876	-0.499733	-0.448689	-0.574866	-1.27622	-0.604438	-0.639588	-0.352969	-2.21405	-0.77264	0.0654885	-0.450328	Uncharacterized protein	101120453	JEQ12_000694	GO:0042981	regulation of apoptotic process											IPR036834,IPR033543	Homologous_superfamily|Family
A0A6P3DYR9	JEQ12_000324	Uncharacterized protein	133.094	A0A6P3DYR9;W5P4B3	JEQ12_000324;NRDC	Uncharacterized protein;Nardilysin convertase	2.30106e-41	54.8984	1.07549	1.28968	1.52281	1.19843	1.44273	1.28683	1.42705	1.31966	1.24214	1.57539	1.43029	1.20376	1.17339	1.20045	1.2746	1.36399	1.38371	1.48017	1.16374	1.22272	1.45444	1.48415	1.45527	1.38348	Uncharacterized protein	101111671	JEQ12_000324	GO:0006508,GO:0046872,GO:0004222	proteolysis|metal ion binding|metalloendopeptidase activity								PF00675,PF05193,PF16187	Peptidase_M16|Peptidase_M16_C|Peptidase_M16_M	Insulinase (Peptidase family M16)|Peptidase M16 inactive domain|Middle or third domain of peptidase_M16	IPR011249,IPR011765,IPR001431,IPR007863,IPR032632	Homologous_superfamily|Domain|Binding_site|Domain|Domain
A0A6P3DYT4	LOC114112996	Mago homolog, exon junction complex subunit	17.1636	A0A6P3DYT4;A0A6P7DNV8;W5QIE6	LOC114112996;JEQ12_000352;MAGOHB	Mago homolog, exon junction complex subunit;Protein mago nashi homolog;Mago homolog B, exon junction complex subunit	1.7915e-25	49.8689	2.19898	2.63279	2.10867	2.28724	2.272	2.0921	2.40022	2.42066	2.24308	2.46913	2.20427	2.56085	1.64106	2.01598	2.36252	2.13767	2.51894	2.30932	1.94535	2.22594	2.40364	2.07435	1.89503	2.25915	Mago homolog, exon junction complex subunit	101118828	LOC114112996	GO:0008380,GO:0035145,GO:0005681	RNA splicing|exon-exon junction complex|spliceosomal complex	oas03040,oas03013,oas03015	Spliceosome|Nucleocytoplasmic transport|mRNA surveillance pathway	K12877	KOG3392	Z	mRNA transport	Cytoskeleton	PF02792	Mago_nashi	Mago nashi protein	IPR004023,IPR036605	Family|Homologous_superfamily
A0A6P3DYT8	JEQ12_000721	alpha-1,2-Mannosidase	73.2119	A0A6P3DYT8;W5QGG8	JEQ12_000721;MAN1A2	alpha-1,2-Mannosidase;alpha-1,2-Mannosidase	6.87956e-11	44.0315	-0.271653	0.188088	0.14203	0.113108	-0.110993	-0.0766897	0.256536	0.258099	0.239388	0.494357	0.39742	0.112615	0.187768	0.0172131	0.213314	-0.133929	0.183983	-0.000370201	-0.0485737	-0.340078	0.148432	0.228581	-0.0451951	0.111981	alpha-1,2-Mannosidase	101108177	JEQ12_000721	GO:0005975,GO:0016020,GO:0005509,GO:0004571	carbohydrate metabolic process|membrane|calcium ion binding|mannosyl-oligosaccharide 1,2-alpha-mannosidase activity	oas00510,oas00513,oas04141	N-Glycan biosynthesis|Various types of N-glycan biosynthesis|Protein processing in endoplasmic reticulum	K01230					PF01532	Glyco_hydro_47	Glycosyl hydrolase family 47	IPR012341,IPR001382,IPR036026	Homologous_superfamily|Family|Homologous_superfamily
A0A6P3DYV1	JEQ12_000400	Nuclear factor 1	55.9442	A0A6P3DYV1;W5PGE5	JEQ12_000400;NFIA	Nuclear factor 1	1.90959e-23	49.163	1.20517	1.15083	1.07094	1.39657	1.22141	1.33097	1.31589	1.20725	1.31796	1.26205	1.63459	1.37054	1.24366	1.49286	1.46101	1.17211	1.29488	1.32688	1.09753	1.18819	1.38612	1.47649	1.29872	1.48345	Nuclear factor 1	101105452	JEQ12_000400	GO:0006260,GO:0045893,GO:0005634,GO:0003677,GO:0003700	DNA replication|positive regulation of DNA-templated transcription|nucleus|DNA binding|DNA-binding transcription factor activity								PF00859,PF03165,PF10524	CTF_NFI|MH1|NfI_DNAbd_pre-N	CTF/NF-I family transcription modulation region|MH1 domain|Nuclear factor I protein pre-N-terminus	IPR000647,IPR020604,IPR019739,IPR019548,IPR003619	Family|Domain|Conserved_site|Domain|Domain
A0A6P3DYX0	JEQ12_000798	RRM domain-containing protein	44.3717	A0A6P3DYX0;W5QHR6	JEQ12_000798;SF3B4	RRM domain-containing protein;Splicing factor 3b subunit 4	3.52095e-27	50.4493	-0.948264	-1.24933	-0.674556	-1.10102	-0.669707	-1.24203	-0.479	-0.969619	-0.568009	-0.908566	-0.644782	-0.914403	-1.05119	-0.950079	-0.775103	-0.988389	-0.720296	-1.03364	-1.09871	-1.36633	-0.652677	-0.957074	-1.05041	-0.757165	RRM domain-containing protein	101101849	JEQ12_000798	GO:0005634,GO:0003723	nucleus|RNA binding	oas03040	Spliceosome	K12831					PF00076	RRM_1	RNA recognition motif. (a.k.a. RRM, RBD, or RNP domain)	IPR012677,IPR035979,IPR000504,IPR034158,IPR034159	Homologous_superfamily|Homologous_superfamily|Domain|Domain|Domain
A0A6P3DYZ2	JEQ12_000484	Uncharacterized protein	77.0627	A0A6P3DYZ2;W5PVL9;W5PVM1	JEQ12_000484;ADGRL4;ADGRL4	Uncharacterized protein;Adhesion G protein-coupled receptor L4;Adhesion G protein-coupled receptor L4	0.000187247	38.7356	-1.49346	-1.37106	-2.69465	-1.20481	-1.51418	-1.1175	-1.79467	-2.00899	-1.35346	-1.45171	-1.93534	-2.07827	-2.03263	-1.35668	-1.41256	-2.32015	-2.00042	-1.21156	-1.97721	-2.04646	-1.67641	-1.27418	-1.4479	-1.75702	Uncharacterized protein	101103604	JEQ12_000484	GO:0007166,GO:0005886,GO:0005509,GO:0004930	cell surface receptor signaling pathway|plasma membrane|calcium ion binding|G protein-coupled receptor activity								PF00002,PF07645,PF16489,PF01825	7tm_2|EGF_CA|GAIN|GPS	7 transmembrane receptor (Secretin family)|Calcium-binding EGF domain|GPCR-Autoproteolysis INducing (GAIN) domain|GPCR proteolysis site, GPS, motif	IPR001881,IPR000742,IPR000152,IPR018097,IPR032471,IPR046338,IPR017981,IPR000832,IPR017983,IPR000203	Domain|Domain|PTM|Conserved_site|Domain|Homologous_superfamily|Domain|Family|Conserved_site|Domain
A0A6P3DZ06	JEQ12_000844	39S ribosomal protein L9, mitochondrial	30.3703	A0A6P3DZ06;W5QIR3	JEQ12_000844;MRPL9	39S ribosomal protein L9, mitochondrial;39S ribosomal protein L9, mitochondrial	4.196e-25	49.7414	0.10589	0.319677	0.292239	0.125064	0.166218	0.182213	0.191815	0.103034	0.200407	0.0232963	0.302389	0.0742792	0.00806292	0.124816	-0.089089	0.277157	-0.0385412	0.193933	-0.0498577	0.0370655	0.061738	0.130298	0.141948	0.317388	39S ribosomal protein L9, mitochondrial	101119267	JEQ12_000844	GO:0006412,GO:1990904,GO:0005840,GO:0003735	translation|ribonucleoprotein complex|ribosome|structural constituent of ribosome	oas03010	Ribosome	K02939					PF01281	Ribosomal_L9_N	Ribosomal protein L9, N-terminal domain	IPR000244,IPR009027,IPR020070,IPR036935	Family|Homologous_superfamily|Domain|Homologous_superfamily
A0A6P3DZ22	JEQ12_000549	RNA polymerase II subunit B1 CTD phosphatase RPAP2 homolog	68.7177	A0A6P3DZ22;W5Q477	JEQ12_000549;RPAP2	RNA polymerase II subunit B1 CTD phosphatase RPAP2 homolog	0.00438211	28.474	-1.11145	-1.75611	0.479699	-2.09249	-1.64287	-1.93641	-1.64464							-1.967	-2.05514	-2.08545	-2.18667	-1.90325	-0.903709	-2.17423	-2.10938	-0.728714	-0.700089	-1.95542	RNA polymerase II subunit B1 CTD phosphatase RPAP2 homolog	101103936	JEQ12_000549	GO:0005634,GO:0046872,GO:0043175,GO:0008420	nucleus|metal ion binding|RNA polymerase core enzyme binding|RNA polymerase II CTD heptapeptide repeat phosphatase activity								PF04181	RPAP2_Rtr1	Rtr1/RPAP2 family	IPR039693,IPR007308,IPR038534	Family|Domain|Homologous_superfamily
A0A6P3DZ25	JEQ12_000903	Protein S100	10.8934	A0A6P3DZ25	JEQ12_000903	Protein S100	3.78692e-30	51.4386	6.64594	6.43772	6.32168	6.86388	6.84903	7.24992	6.07151	6.4765	6.53615	6.76258	6.36826	6.6681	7.05375	6.82523	6.63865	6.95567	6.60358	6.46567	6.78293	5.8042	6.67424	6.50811	6.77231	7.05787	Protein S100	101105293	JEQ12_000903	GO:0005509,GO:0046914	calcium ion binding|transition metal ion binding								PF01023	S_100	S-100/ICaBP type calcium binding domain	IPR011992,IPR018247,IPR002048,IPR034325,IPR001751,IPR013787	Homologous_superfamily|Binding_site|Domain|Domain|Conserved_site|Domain
A0A6P3DZ28	JEQ12_000559	Formin-binding protein 1-like	63.5109	A0A6P3DZ28;W5Q5W3;W5Q5W6	JEQ12_000559;FNBP1L;FNBP1L	Formin-binding protein 1-like	3.58164e-35	53.0488	-0.225768	0.141405	0.0157847	-0.0512155	-0.103919	0.135288	0.0951764	0.114336	-0.218553	0.00322124	0.030046	0.114338	-0.268463	-0.0638501	0.238329	0.0927372	0.230879	-0.0245011	-0.140027	-0.170164	0.414773	-0.132669	0.0553134	-0.112567	Formin-binding protein 1-like	101106379	JEQ12_000559	GO:0006914,GO:0006897,GO:0007165,GO:0005938,GO:0005856,GO:0005886,GO:0008289	autophagy|endocytosis|signal transduction|cell cortex|cytoskeleton|plasma membrane|lipid binding								PF00611,PF00018	FCH|SH3_1	Fes/CIP4, and EFC/F-BAR homology domain|SH3 domain	IPR027267,IPR031160,IPR001060,IPR035494,IPR035493,IPR011072,IPR036028,IPR001452	Homologous_superfamily|Domain|Domain|Domain|Domain|Domain|Homologous_superfamily|Domain
A0A6P3DZ39	JEQ12_000924	HCLS1-associated protein X-1	31.4192	A0A6P3DZ39;W5NW58	JEQ12_000924;HAX1	HCLS1-associated protein X-1	0.000677956	36.7968	-2.16058	-1.21672	-1.95537	-1.68354	-1.48917	-1.59459	-1.03094	-0.989906	-2.07562	-0.805192	-1.15529	-1.53565	-1.41793	-1.65072	-1.41836	-1.55514	-0.533176	-1.96106	-1.49129	-1.28298	-1.95302	-1.55781	-0.724511	-1.56367	HCLS1-associated protein X-1	101111760	JEQ12_000924	GO:0043066,GO:0031410,GO:0005739,GO:0031965,GO:0016529	negative regulation of apoptotic process|cytoplasmic vesicle|mitochondrion|nuclear membrane|sarcoplasmic reticulum											IPR017248	Family
A0A6P3DZ52	JEQ12_000981	Uncharacterized protein	23.3274	A0A6P3DZ52;W5P6G2	JEQ12_000981;LOC101102276	Uncharacterized protein;Polyamine-modulated factor 1	6.45284e-12	44.4375	-0.199798	-1.12784	-0.90498	-0.599917	-0.566311	-1.09444	-0.675311	-0.0837207	-0.741622	-0.328163	-0.804519	-0.896385	-0.77559	-0.796237	-0.236149	-0.590746	-0.851086	-1.05368	-0.0319087	-0.645693	-0.730737	-0.841649	-0.876917	-0.817934	Uncharacterized protein	101102276	JEQ12_000981	GO:0007049,GO:0051301,GO:0000444,GO:0005634	cell cycle|cell division|MIS12/MIND type complex|nucleus								PF03980	Nnf1	Nnf1	IPR007128	Family
A0A6P3DZ76	JEQ12_000620	Pre-mRNA-splicing factor 38B	64.0444	A0A6P3DZ76	JEQ12_000620	Pre-mRNA-splicing factor 38B	2.15843e-42	55.188	0.345963	0.385102	0.684487	0.607142	0.74543	0.430111	0.683765	0.720483	0.5481	0.760617	0.718509	0.430771	0.662417	0.645012	0.662494	0.552269	0.534596	0.792625	0.288959	0.411771	0.740532	0.793294	0.538739	0.912488	Pre-mRNA-splicing factor 38B	101121896	JEQ12_000620	GO:0000398,GO:0071011	mRNA splicing, via spliceosome|precatalytic spliceosome	oas03040	Spliceosome	K12850					PF03371	PRP38	PRP38 family	IPR005037	Family
A0A6P3DZA4	JEQ12_000681	Cortactin-binding protein-2 N-terminal domain-containing protein	69.9716	A0A6P3DZA4;W5QEH8	JEQ12_000681;CTTNBP2NL	Cortactin-binding protein-2 N-terminal domain-containing protein;CTTNBP2 N-terminal like	6.3954e-07	42.1786	0.144696	-0.50807	-0.182395	-0.691995	-0.0347161	-0.272265	-0.476912	-0.512608	-0.328406	-0.215055	-0.415679	-0.781262	-0.466056	-0.392611	-0.620188	-0.124105	-0.0895258	-0.322655	-1.17636	-0.357558	-0.57042	-0.132494	-0.13985	-0.183789	Cortactin-binding protein-2 N-terminal domain-containing protein	101116359	JEQ12_000681										PF09727	CortBP2	Cortactin-binding protein-2	IPR019131	Domain
A0A6P3DZB0	JEQ12_001146	FAM21/CAPZIP domain-containing protein	40.3211	A0A6P3DZB0;W5PRI2	JEQ12_001146;RCSD1	FAM21/CAPZIP domain-containing protein;RCSD domain containing 1	7.27243e-27	50.3432	-0.769555	0.0654021	-0.606363	-0.751128	-0.655019	-0.330201	-0.779922	-0.373726	-1.18367	-0.730918	-0.842491	-0.444728	-0.745178	-1.03628	-0.379339	-0.451504	-0.398185	-0.509024	-1.24423	-0.263847	-1.01472	-0.767605	-0.766591	-0.817385	FAM21/CAPZIP domain-containing protein	101115084	JEQ12_001146										PF15255,PF05177	CAP-ZIP_m|RCSD	WASH complex subunit CAP-Z interacting, central region|RCSD region	IPR029341,IPR007850	Domain|Family
A0A6P3DZB2	JEQ12_000688	Major facilitator superfamily (MFS) profile domain-containing protein	54.1901	A0A6P3DZB2;W5QET6	JEQ12_000688;SLC16A1	Major facilitator superfamily (MFS) profile domain-containing protein;Solute carrier family 16 member 1	3.55117e-17	46.7835	-0.272744	0.0906863	-0.0279254	-0.321528	-0.648347	-0.252022	-0.178288	-0.556811	0.237155	-0.893404	-0.278106	0.100764	0.180764	0.0244189	-0.449153	-0.295751	0.328134	-0.0988974	-0.571493	-0.353476	-0.129548	-0.0698951	0.00455938	-0.188923	Major facilitator superfamily (MFS) profile domain-containing protein	443456	JEQ12_000688	GO:0016020,GO:0008028	membrane|monocarboxylic acid transmembrane transporter activity								PF07690	MFS_1	Major Facilitator Superfamily	IPR004743,IPR011701,IPR020846,IPR036259	Family|Family|Domain|Homologous_superfamily
A0A6P3DZG3	JEQ12_000784	Histone H2B	13.9202	A0A6P3DZG3;W5QHL3	JEQ12_000784;LOC101120455	Histone H2B	1.47998e-07	42.5698	-0.349166	-0.60025	-1.16436	0.512372	-1.90965	-2.37668	-2.8472	-2.55828	-2.81322	-3.04992	-2.59046	-1.40771	-2.24547	-1.36868	-2.63951	-3.0514	-2.39555	-2.32631	-2.45388	-3.32926	-2.37726	-3.23021	-2.44242	-2.46578	Histone H2B	101120455	JEQ12_000784	GO:0000786,GO:0005634,GO:0003677,GO:0046982,GO:0030527	nucleosome|nucleus|DNA binding|protein heterodimerization activity|structural constituent of chromatin	oas04613,oas05203,oas05322,oas05034	Neutrophil extracellular trap formation|Viral carcinogenesis|Systemic lupus erythematosus|Alcoholism	K11252					PF00125	Histone	Core histone H2A/H2B/H3/H4	IPR009072,IPR007125,IPR000558	Homologous_superfamily|Domain|Family
A0A6P3DZG4	JEQ12_001279	CGG triplet repeat-binding protein 1	18.8204	A0A6P3DZG4;A0A6P7EX50	JEQ12_001279;CGGBP1	CGG triplet repeat-binding protein 1;CGG triplet repeat binding protein 1	1.54003e-22	48.8398	0.781971	1.19367	1.06343	0.761261	1.05919	1.21252	1.054	0.914255	0.910062	0.042822	0.637598	0.694057	0.465996	0.839944	0.73416	0.48122	1.02872	0.807562	0.555735	0.866759	1.07845	0.909488	0.237511	0.804838	CGG triplet repeat-binding protein 1	101121901	JEQ12_001279	GO:0006357,GO:0005634,GO:0003690	regulation of transcription by RNA polymerase II|nucleus|double-stranded DNA binding											IPR033375	Family
A0A6P3DZJ3	JEQ12_001319	Uncharacterized protein	67.5188	A0A6P3DZJ3	JEQ12_001319	Uncharacterized protein	8.70825e-36	53.2373	1.96691	1.98266	2.31728	2.03993	2.19579	2.20853	2.22862	2.1628	2.27039	2.43119	2.43417	2.12315	2.16028	2.2606	2.21647	2.23014	2.21354	2.17162	2.06845	2.03796	2.36448	2.34452	2.26555	2.33829	Uncharacterized protein	101109499	JEQ12_001319										PF00515,PF13181	TPR_1|TPR_8	Tetratricopeptide repeat|Tetratricopeptide repeat	IPR011990,IPR001440,IPR019734	Homologous_superfamily|Repeat|Repeat
A0A6P3DZL2	ATP6V1A	H(+)-transporting two-sector ATPase	68.4753	A0A6P3DZL2;A0A6P7EWC9	ATP6V1A;JEQ12_001371	H(+)-transporting two-sector ATPase	2.87029e-40	54.5793	3.66994	3.55287	3.61183	3.77455	3.73189	3.69385	3.65385	3.77184	3.718	3.85347	3.74504	3.83421	3.64641	3.83955	3.72824	3.78322	3.68127	3.7151	3.6968	3.6444	3.8252	3.84029	3.8393	3.9123	H(+)-transporting two-sector ATPase	101102025	ATP6V1A	GO:0030665,GO:0033180,GO:0030133,GO:0005524,GO:0046933,GO:0046961	clathrin-coated vesicle membrane|proton-transporting V-type ATPase, V1 domain|transport vesicle|ATP binding|proton-transporting ATP synthase activity, rotational mechanism|proton-transporting ATPase activity, rotational mechanism	oas00190,oas04150,oas04145,oas04966,oas04721,oas05165,oas05323	Oxidative phosphorylation|mTOR signaling pathway|Phagosome|Collecting duct acid secretion|Synaptic vesicle cycle|Human papillomavirus infection|Rheumatoid arthritis	K02145	KOG1352	C	proton-transporting ATPase activity, rotational mechanism	Energy production and conversion	PF00006,PF02874,PF16886	ATP-synt_ab|ATP-synt_ab_N|ATP-synt_ab_Xtn	ATP synthase alpha/beta family, nucleotide-binding domain|ATP synthase alpha/beta family, beta-barrel domain|ATPsynthase alpha/beta subunit N-term extension	IPR031686,IPR023366,IPR020003,IPR004100,IPR036121,IPR000194,IPR024034,IPR005725,IPR027417,IPR022878	Domain|Homologous_superfamily|Active_site|Domain|Homologous_superfamily|Domain|Homologous_superfamily|Family|Homologous_superfamily|Family
A0A6P3DZL9	LOC101117181	Cytochrome C oxidase Copper Chaperone	6.78096	A0A6P3DZL9	LOC101117181	Cytochrome C oxidase Copper Chaperone	1.11848e-36	53.51	1.2951	1.49272	1.37695	1.2117	1.35109	1.29056	1.03926	0.903606	0.754409	1.23335	0.973373	1.04546	0.794147	1.06886	1.56225	1.08736	0.9847	1.34351	0.89453	0.771082	1.04114	0.776729	1.039	1.1903	Cytochrome C oxidase Copper Chaperone	101107153	LOC101117181	GO:0005758,GO:0016531,GO:0005507	mitochondrial intermembrane space|copper chaperone activity|copper ion binding	oas00190,oas04714	Oxidative phosphorylation|Thermogenesis	K02260	KOG3496	O	copper chaperone activity	Posttranslational modification, protein turnover, chaperones	PF05051	COX17	Cytochrome C oxidase copper chaperone (COX17)	IPR009069,IPR007745	Homologous_superfamily|Family
A0A6P3DZM4	JEQ12_001404	Uncharacterized protein	26.3828	A0A6P3DZM4;W5QFA9	JEQ12_001404;RABL3	Uncharacterized protein;RAB, member of RAS oncogene family like 3	0.00737108	26.0333	4.65595	4.44625	4.11812	4.7008	4.19207	4.83165	3.51813	3.3736	3.96219	3.40562	3.96088	4.2322	3.60679	4.70074	3.80565	4.43042	4.1112	3.93125	3.80368	4.46691	4.43089	4.09272	3.45305	3.91232	Uncharacterized protein	101108873	JEQ12_001404										PF08477	Roc	Ras of Complex, Roc, domain of DAPkinase	IPR027417	Homologous_superfamily
A0A6P3DZN7	JEQ12_000901	Protein S100	11.7766	A0A6P3DZN7	JEQ12_000901	Protein S100	2.67644e-14	45.5196	6.62341	6.56143	6.51888	6.72358	6.02383	6.64557	6.59434	6.35051	7.14689	6.48253	6.87628	6.35324	6.07851	6.69614	6.00341	6.31975	6.14043	6.96025	6.46693	6.57136	6.28096	6.7187	6.30072	6.541	Protein S100	101104794	JEQ12_000901	GO:0005509,GO:0046914	calcium ion binding|transition metal ion binding								PF01023	S_100	S-100/ICaBP type calcium binding domain	IPR011992,IPR018247,IPR002048,IPR034325,IPR001751,IPR013787	Homologous_superfamily|Binding_site|Domain|Domain|Conserved_site|Domain
A0A6P3DZP2	JEQ12_000909	Uncharacterized protein	43.0621	A0A6P3DZP2;W5NRN6	JEQ12_000909;ILF2	Uncharacterized protein;Interleukin enhancer binding factor 2	3.20523e-27	50.4631	3.1611	3.42285	3.25774	3.49955	3.42214	3.68911	3.28601	3.23329	3.54308	3.65751	3.52426	3.2542	3.61319	3.4953	3.23455	3.75575	3.40916	3.408	3.43795	3.43823	3.37503	3.39729	3.70357	3.5129	Uncharacterized protein	101106476	JEQ12_000909										PF07528	DZF	DZF domain	IPR006561,IPR043519	Domain|Homologous_superfamily
A0A6P3DZQ0	JEQ12_001465	D-beta-hydroxybutyrate dehydrogenase, mitochondrial	38.348	A0A6P3DZQ0;A0A836AEX2	JEQ12_001465;BDH1	D-beta-hydroxybutyrate dehydrogenase, mitochondrial;3-hydroxybutyrate dehydrogenase 1	7.23311e-46	56.1605	2.33065	1.81275	2.38796	1.91777	2.05243	2.2016	2.49999	2.47161	2.22511	2.31473	2.41116	2.3014	2.38635	2.27296	2.27191	2.56474	2.08784	2.38694	2.52813	1.71383	2.38729	2.5748	2.54945	2.55167	D-beta-hydroxybutyrate dehydrogenase, mitochondrial	101104112	JEQ12_001465	GO:0016616	oxidoreductase activity, acting on the CH-OH group of donors, NAD or NADP as acceptor	oas00650	Butanoate metabolism	K00019					PF00106	adh_short	short chain dehydrogenase	IPR036291,IPR020904,IPR002347	Homologous_superfamily|Conserved_site|Family
A0A6P3DZQ8	JEQ12_000952	Uncharacterized protein	104.113	A0A6P3DZQ8	JEQ12_000952	Uncharacterized protein	8.7761e-29	50.9872	1.52846	2.82996	1.20455	1.1991	0.250406	1.13859	1.63898	1.12844	1.6935	0.866934	0.639828	1.15039	0.546739	1.05614	1.48647	1.1525	0.780309	1.13855	0.997569	1.86059	0.650913	0.671194	0.518197	1.09879	Uncharacterized protein	101116784	JEQ12_000952	GO:0007155,GO:0005576,GO:0005509,GO:0008201	cell adhesion|extracellular region|calcium ion binding|heparin binding	oas04151,oas04512,oas04145,oas04510,oas05165,oas05144	PI3K-Akt signaling pathway|ECM-receptor interaction|Phagosome|Focal adhesion|Human papillomavirus infection|Malaria	K04659					PF11598,PF07645,PF02412,PF05735	COMP|EGF_CA|TSP_3|TSP_C	Cartilage oligomeric matrix protein|Calcium-binding EGF domain|Thrombospondin type 3 repeat|Thrombospondin C-terminal region	IPR013320,IPR001881,IPR000742,IPR018097,IPR001791,IPR003367,IPR017897,IPR008859,IPR024665,IPR046970,IPR028507,IPR028974	Homologous_superfamily|Domain|Domain|Conserved_site|Domain|Repeat|Repeat|Domain|Domain|Homologous_superfamily|Domain|Homologous_superfamily
A0A6P3DZU0	JEQ12_001575	Uncharacterized protein	29.5844	A0A6P3DZU0;W5QHP0	JEQ12_001575;MRPL47	Uncharacterized protein;Mitochondrial ribosomal protein L47	3.0308e-20	47.9984	-0.215788	-0.547147	-0.188486	-0.524854	-0.540113	-0.474426	-0.227921	0.149405	-0.0599667	-0.0462801	-0.206478	-0.403747	-0.0655276	-0.480044	-0.366844	-0.0388367	-0.172917	-0.393339	-0.154263	-0.402696	-0.475202	0.112716	-0.303747	-0.576463	Uncharacterized protein	101108442	JEQ12_001575	GO:0006412,GO:0005761,GO:1990904,GO:0003735	translation|mitochondrial ribosome|ribonucleoprotein complex|structural constituent of ribosome								PF06984	MRP-L47	Mitochondrial 39-S ribosomal protein L47 (MRP-L47)	IPR038340,IPR010729	Homologous_superfamily|Family
A0A6P3E071	JEQ12_001402	NADH dehydrogenase [ubiquinone] 1 beta subcomplex subunit 4	15.1452	A0A6P3E071;W5QF73	JEQ12_001402;NDUFB4	NADH dehydrogenase [ubiquinone] 1 beta subcomplex subunit 4	2.66783e-13	45.0518	1.64727	1.56732	1.68758	1.8719	1.66351	1.96208	1.98699	1.76779	1.67471	1.78294	1.31261	1.69018	1.76991	1.63	1.83277	1.84337	1.91146	1.69474	1.28411	1.62586	1.58215	1.61422	1.50672	1.91856	NADH dehydrogenase [ubiquinone] 1 beta subcomplex subunit 4	101108353	JEQ12_001402	GO:0005743	mitochondrial inner membrane	oas00190,oas04723,oas04714,oas05208,oas05010,oas05012,oas05014,oas05016,oas05020,oas05022,oas05415,oas04932	Oxidative phosphorylation|Retrograde endocannabinoid signaling|Thermogenesis|Chemical carcinogenesis - reactive oxygen species|Alzheimer disease|Parkinson disease|Amyotrophic lateral sclerosis|Huntington disease|Prion disease|Pathways of neurodegeneration - multiple diseases|Diabetic cardiomyopathy|Non-alcoholic fatty liver disease	K03960					PF07225	NDUF_B4	NADH-ubiquinone oxidoreductase B15 subunit (NDUFB4)	IPR009866	Family
A0A6P3E078	JEQ12_001419	Uncharacterized protein	17.5925	A0A6P3E078;W5QFW8;W5QFW9	JEQ12_001419;FAM162A;FAM162A	Uncharacterized protein;Family with sequence similarity 162 member A;Family with sequence similarity 162 member A	5.8721e-23	48.9898	1.32199	1.00921	1.42823	0.948564	1.26228	1.20942	1.36928	1.33245	1.61193	1.50116	1.48228	1.32322	1.08415	1.39466	1.48473	1.11051	1.31236	1.13718	0.460868	1.03892	1.23363	1.38617	0.613378	1.33663	Uncharacterized protein	101113293	JEQ12_001419	GO:0016020	membrane								PF06388	DUF1075	Protein of unknown function (DUF1075)	IPR009432	Family
A0A6P3E0B5	JEQ12_001546	AP-2 complex subunit mu	49.3894	A0A6P3E0B5	JEQ12_001546	AP-2 complex subunit mu	4.95432e-18	47.1339	3.4397	3.54482	3.63186	3.52173	3.70294	3.65118	3.53902	3.5976	3.31212	3.85434	3.82165	3.50148	3.68748	3.70946	3.75407	3.61721	3.70116	3.57993	3.41472	3.62761	3.80578	3.7645	3.64578	3.85833	AP-2 complex subunit mu	101122320	JEQ12_001546	GO:0006897,GO:0006886,GO:0030131,GO:0005905,GO:0008289	endocytosis|intracellular protein transport|clathrin adaptor complex|clathrin-coated pit|lipid binding	oas04144,oas04961,oas04721,oas05016	Endocytosis|Endocrine and other factor-regulated calcium reabsorption|Synaptic vesicle cycle|Huntington disease	K11826					PF00928,PF01217	Adap_comp_sub|Clat_adaptor_s	Adaptor complexes medium subunit family|Clathrin adaptor complex small chain	IPR036168,IPR043532,IPR022775,IPR001392,IPR018240,IPR011012,IPR028565,IPR043512	Homologous_superfamily|Domain|Domain|Family|Conserved_site|Homologous_superfamily|Domain|Domain
A0A6P3E0D0	JEQ12_008676	26S proteasome non-ATPase regulatory subunit 5	56.1786	A0A6P3E0D0	JEQ12_008676	26S proteasome non-ATPase regulatory subunit 5	9.31338e-32	51.9652	4.58804	4.54306	4.65605	4.62557	4.69956	4.67404	4.75192	4.71767	4.64293	4.54947	4.62139	4.80551	4.74346	4.62808	4.6964	4.70448	4.65599	4.61058	4.72009	4.59403	4.86864	4.79755	4.6216	4.73778	26S proteasome non-ATPase regulatory subunit 5	101122326	JEQ12_008676	GO:0043248	proteasome assembly								PF10508	Proteasom_PSMB	Proteasome non-ATPase 26S subunit	IPR011989,IPR016024,IPR019538	Homologous_superfamily|Homologous_superfamily|Family
A0A6P3E0D1	JEQ12_001599	Phospholipase	124.499	A0A6P3E0D1;W5QHV7;W5QHV8	JEQ12_001599;PLD1;PLD1	Phospholipase	0.00700492	26.2758			-1.31909									-1.15014		-0.828498	-1.8983	-0.854774			-1.28257			-0.989313	-1.88486	-1.79858	Phospholipase	101114661	JEQ12_001599	GO:0048017,GO:0016042,GO:0006654,GO:0005737,GO:0012505,GO:0043231,GO:0070290,GO:0035091,GO:0004630	inositol lipid-mediated signaling|lipid catabolic process|phosphatidic acid biosynthetic process|cytoplasm|endomembrane system|intracellular membrane-bounded organelle|N-acylphosphatidylethanolamine-specific phospholipase D activity|phosphatidylinositol binding|phospholipase D activity	oas00564,oas00565,oas04014,oas04072,oas04071,oas04024,oas04144,oas04666,oas04912,oas04928,oas04724,oas05200,oas05208,oas05231,oas05212	Glycerophospholipid metabolism|Ether lipid metabolism|Ras signaling pathway|Phospholipase D signaling pathway|Sphingolipid signaling pathway|cAMP signaling pathway|Endocytosis|Fc gamma R-mediated phagocytosis|GnRH signaling pathway|Parathyroid hormone synthesis, secretion and action|Glutamatergic synapse|Pathways in cancer|Chemical carcinogenesis - reactive oxygen species|Choline metabolism in ca…	K01115					PF00169,PF00614,PF13091,PF00787	PH|PLDc|PLDc_2|PX	PH domain|Phospholipase D Active site motif|PLD-like domain|PX domain	IPR011993,IPR001849,IPR025202,IPR001736,IPR016555,IPR015679,IPR001683,IPR036871	Homologous_superfamily|Domain|Domain|Domain|Family|Family|Domain|Homologous_superfamily
A0A6P3E0D5	JEQ12_001610	Translocation protein SEC62	45.7478	A0A6P3E0D5;W5NQN5	JEQ12_001610;SEC62	Translocation protein SEC62	0.00180116	33.6241	0.34265	0.711017	1.0184	0.703889	0.676115	0.838808	1.1589	1.00824	1.17618	1.22899	1.30806	0.720084	0.930178	0.758983	1.09659	1.01599	0.761424	0.825399	0.33586	0.770719	0.958083	1.04808	0.697093	1.06825	Translocation protein SEC62	101119522	JEQ12_001610	GO:0015031,GO:0005789	protein transport|endoplasmic reticulum membrane	oas03060,oas04141	Protein export|Protein processing in endoplasmic reticulum	K12275					PF03839	Sec62	Translocation protein Sec62	IPR004728	Family
A0A6P3E0G2	JEQ12_001713	Uncharacterized protein	118.951	A0A6P3E0G2;W5P4H3	JEQ12_001713;LOC101121993	Uncharacterized protein;Ceruloplasmin-like	2.34858e-09	43.4271	-2.06863		-2.76125			-1.72207		-3.13369	-3.38255	-2.35696	-3.07329	-2.90074	-1.57409	-4.49022	-2.97238	-4.52403	-1.26722	-3.10642	-0.535503	-2.39849	-1.73128	-3.68683	-4.48028	-3.85644	Uncharacterized protein	101121993	JEQ12_001713	GO:0006825,GO:0005576,GO:0005507,GO:0016491	copper ion transport|extracellular region|copper ion binding|oxidoreductase activity	oas00860,oas04216	Porphyrin metabolism|Ferroptosis	K13624					PF07731,PF07732	Cu-oxidase_2|Cu-oxidase_3	Multicopper oxidase|Multicopper oxidase	IPR011706,IPR045087,IPR011707,IPR033138,IPR002355,IPR008972,IPR024715	Domain|Family|Domain|Conserved_site|Binding_site|Homologous_superfamily|Family
A0A6P3E0G9	JEQ12_001751	Uncharacterized protein	12.6794	A0A6P3E0G9;W5P9B7	JEQ12_001751;RNF7	Uncharacterized protein;Ring finger protein 7	3.55227e-12	44.5461	-1.11821	-1.1183	-0.999853	-0.510324	-0.291192	-1.22083	-0.905356	-0.316822	-1.87899	-0.277204	-0.434607	-0.93129	-1.10523	-1.70449	0.570825	-0.519079	-0.841138	-0.449484	-0.495863	-1.05703	-0.0240838	-0.606138	-0.836344	-0.530652	Uncharacterized protein	101106816	JEQ12_001751	GO:0008270	zinc ion binding	oas04120,oas05170	Ubiquitin mediated proteolysis|Human immunodeficiency virus 1 infection	K10611					PF12678	zf-rbx1	RING-H2 zinc finger domain	IPR001841,IPR013083,IPR024766	Domain|Homologous_superfamily|Domain
A0A6P3E0H4	JEQ12_001766	Uncharacterized protein	40.7067	A0A6P3E0H4;W5PB25	JEQ12_001766;MRPS22	Uncharacterized protein;Mitochondrial ribosomal protein S22	2.46309e-13	45.068	-0.942505	-0.669436	-0.463576	-0.364562	-1.08497	-0.231115	-0.488332	-0.572256	-0.75183	-0.581508	-0.566411	-0.690626	-0.555317	-0.713905	-0.810364	-0.712386	-0.667074	-0.401804	-0.882083	-0.918311	-0.304318	-0.524155	-0.508084	-0.610757	Uncharacterized protein	101109502	JEQ12_001766										PF10245	MRP-S22	Mitochondrial 28S ribosomal protein S22	IPR019374	Family
A0A6P3E0H8	JEQ12_001781	Lariat debranching enzyme C-terminal domain-containing protein	61.3917	A0A6P3E0H8	JEQ12_001781	Lariat debranching enzyme C-terminal domain-containing protein	6.51357e-33	52.3362	-0.396702	-0.522418	-0.37252	-0.66568	-0.35472	-0.533077	-0.302779	-0.416717	-0.60321	-0.325665	-0.0824156	-0.676133	-0.489966	-0.39593	-0.623995	-0.484025	-0.688566	-0.425303	-0.3615	-0.661871	-0.513375	-0.301266	-0.205779	-0.361138	Lariat debranching enzyme C-terminal domain-containing protein	101111415	JEQ12_001781	GO:0006397,GO:0005634,GO:0008419	mRNA processing|nucleus|RNA lariat debranching enzyme activity								PF05011,PF00149	DBR1|Metallophos	Lariat debranching enzyme, C-terminal domain|Calcineurin-like phosphoesterase	IPR004843,IPR007708,IPR041816,IPR029052	Domain|Domain|Domain|Homologous_superfamily
A0A6P3E0I5	JEQ12_008790	Uncharacterized protein	71.3748	A0A6P3E0I5;W5PCB2	JEQ12_008790;ZNF189	Uncharacterized protein;Zinc finger protein 189	0.00154414	34.384	-3.63449	-2.64054	-2.66766	-2.83363	-3.17606	-2.45462	-1.63649	-2.1266	-2.85952	-2.08702	-2.35485	-2.36601	-3.07715	-2.65094	-1.87856	-2.88721	-2.71639	-3.18325	-3.56254	-2.38078	-3.54256	-3.60838	-3.14243	-1.76521	Uncharacterized protein	101121745	JEQ12_008790	GO:0006355	regulation of DNA-templated transcription	oas05168	Herpes simplex virus 1 infection	K09228					PF01352,PF00096	KRAB|zf-C2H2	KRAB box|Zinc finger, C2H2 type	IPR001909,IPR036051,IPR036236,IPR013087	Domain|Homologous_superfamily|Homologous_superfamily|Domain
A0A6P3E0K4	JEQ12_008840	Uncharacterized protein	42.2251	A0A6P3E0K4;W5PEI2	JEQ12_008840;ASPN	Uncharacterized protein;Asporin	1.30809e-32	52.2398	8.08028	9.1511	7.45756	8.14054	6.94371	7.57601	7.57008	7.50323	8.07484	6.8065	7.25894	8.20226	7.08701	7.9144	8.09656	7.45793	7.54931	7.81351	7.40515	8.23904	6.78377	7.33148	6.96599	7.61484	Uncharacterized protein	101108885	JEQ12_008840	GO:0005576	extracellular region								PF13855,PF01462	LRR_8|LRRNT	Leucine rich repeat|Leucine rich repeat N-terminal domain	IPR001611,IPR003591,IPR032675,IPR000372,IPR016352	Repeat|Repeat|Homologous_superfamily|Domain|Family
A0A6P3E0L8	JEQ12_001920	Protein S100	10.686	A0A6P3E0L8;W5PVB6	JEQ12_001920;S100B	Protein S100	2.49199e-35	53.0971	0.259296	-0.664498	-0.780022	-0.91403	-1.15553	-0.0725869	-1.10339	-0.233437	-0.167198	-0.681229	-0.659923	-0.135918	-0.627304	-0.299486	-0.349015	-0.469159	-1.23767	-1.00826	-1.73143	-0.545414	-0.802717	-0.531646	-0.574755	-0.350996	Protein S100	101113190	JEQ12_001920	GO:0005737,GO:0005634,GO:0005509,GO:0008270	cytoplasm|nucleus|calcium ion binding|zinc ion binding								PF00036,PF01023	EF-hand_1|S_100	EF hand|S-100/ICaBP type calcium binding domain	IPR011992,IPR018247,IPR002048,IPR028481,IPR001751,IPR013787	Homologous_superfamily|Binding_site|Domain|Family|Conserved_site|Domain
A0A6P3E0M4	JEQ12_008884	Galactose-1-phosphate uridylyltransferase	41.2448	A0A6P3E0M4;W5PHB8	JEQ12_008884;GALT	Galactose-1-phosphate uridylyltransferase	5.45682e-27	50.3852	1.26635	1.12855	1.04556	1.13833	0.925499	1.17347	1.09499	1.42646	1.0877	1.5016	1.21529	1.37919	1.10858	1.16016	1.13985	1.02058	1.13424	1.19693	0.973831	1.3561	0.929352	1.16352	1.14282	1.3635	Galactose-1-phosphate uridylyltransferase	101120986	JEQ12_008884	GO:0033499,GO:0008108,GO:0008270	galactose catabolic process via UDP-galactose|UDP-glucose:hexose-1-phosphate uridylyltransferase activity|zinc ion binding	oas00052,oas00520,oas04917	Galactose metabolism|Amino sugar and nucleotide sugar metabolism|Prolactin signaling pathway	K00965					PF02744,PF01087	GalP_UDP_tr_C|GalP_UDP_transf	Galactose-1-phosphate uridyl transferase, C-terminal domain|Galactose-1-phosphate uridyl transferase, N-terminal domain	IPR001937,IPR019779,IPR005850,IPR005849,IPR036265	Family|Active_site|Domain|Domain|Homologous_superfamily
A0A6P3E0M9	JEQ12_001970	Uncharacterized protein	63.6423	A0A6P3E0M9;W5Q0R8	JEQ12_001970;HACL1	Uncharacterized protein;2-hydroxyacyl-CoA lyase 1	5.68626e-44	55.6349	1.43536	1.01665	1.55899	1.45266	1.6291	1.758	1.29897	1.41325	1.77141	1.18811	1.73892	1.73347	1.9478	1.72704	1.68803	1.36899	1.47601	1.05943	1.68478	1.42679	1.46254	1.43134	1.40772	1.49535	Uncharacterized protein	101119009	JEQ12_001970	GO:0006631,GO:0016829,GO:0000287,GO:0030976	fatty acid metabolic process|lyase activity|magnesium ion binding|thiamine pyrophosphate binding	oas04146	Peroxisome	K12261					PF02775,PF00205,PF02776	TPP_enzyme_C|TPP_enzyme_M|TPP_enzyme_N	Thiamine pyrophosphate enzyme, C-terminal TPP binding domain|Thiamine pyrophosphate enzyme, central domain|Thiamine pyrophosphate enzyme, N-terminal TPP binding domain	IPR029035,IPR045025,IPR029061,IPR012000,IPR012001,IPR011766	Homologous_superfamily|Family|Homologous_superfamily|Domain|Domain|Domain
A0A6P3E0N4	JEQ12_000016	dTMP kinase	23.8312	A0A6P3E0N4;W5Q861	JEQ12_000016;DTYMK	dTMP kinase	2.21729e-27	50.5174	0.383859	0.0246653	0.553938	0.14944	0.506482	0.284352	0.488618	0.437256	0.406251	0.416306	0.26175	0.679239	0.5096	0.411292	0.507663	0.423919	0.188031	0.320561	0.469018	0.556118	0.587059	0.705964	0.236443	0.397076	dTMP kinase	101121994	JEQ12_000016	GO:0006233,GO:0005524,GO:0004798	dTDP biosynthetic process|ATP binding|thymidylate kinase activity	oas00240	Pyrimidine metabolism	K00943					PF02223	Thymidylate_kin	Thymidylate kinase	IPR027417,IPR039430,IPR018095,IPR018094	Homologous_superfamily|Domain|Conserved_site|Family
A0A6P3E0Q9	JEQ12_008962	Uncharacterized protein	35.8176	A0A6P3E0Q9;W5PLD7	JEQ12_008962;NUDT18	Uncharacterized protein;Nudix hydrolase 18	2.13534e-23	49.1459	-0.195847	-0.143326	-0.135236	0.107852	0.0693689	0.229238	-0.0176601	0.0471171	0.149396	0.0784978	0.0281748	0.114598	-0.00318269	-0.0613277	-0.129617	-0.170663	-0.193376	-0.674507	-0.571559	0.210285	0.175071	-0.0533851	-0.120255	-0.0683842	Uncharacterized protein	101117473	JEQ12_008962	GO:0017110	nucleoside diphosphate phosphatase activity								PF00293	NUDIX	NUDIX domain	IPR020476,IPR015797,IPR020084,IPR000086,IPR042970	Domain|Homologous_superfamily|Conserved_site|Domain|Domain
A0A6P3E0T4	JEQ12_009056	Tropomyosin beta chain	32.9758	A0A6P3E0T4;W5PQL4	JEQ12_009056;TPM2	Tropomyosin beta chain;Tropomyosin 2	2.85576e-11	44.1791	7.45774	5.92986	5.82424	6.4569	5.36823	6.25212	5.95518	6.28565	7.86169	5.87894	5.98731	6.15763	5.1821	6.0056	5.98866	6.23439	6.07284	5.24368	6.25537	6.17877	5.69554	5.47899	6.29141	6.02371	Tropomyosin beta chain	101114931	JEQ12_009056	GO:0005856,GO:0003779	cytoskeleton|actin binding	oas04814,oas04260,oas04261,oas05410,oas05414	Motor proteins|Cardiac muscle contraction|Adrenergic signaling in cardiomyocytes|Hypertrophic cardiomyopathy|Dilated cardiomyopathy	K10374					PF00261	Tropomyosin	Tropomyosin	IPR000533,IPR014751	Family|Homologous_superfamily
A0A6P3E0U9	JEQ12_009096	Uncharacterized protein	23.7558	A0A6P3E0U9;W5PSM0;W5PSM3	JEQ12_009096;OSTF1;OSTF1	Uncharacterized protein;Osteoclast stimulating factor 1;Osteoclast stimulating factor 1	1.99291e-29	51.201	2.76805	2.70187	2.54827	2.68119	3.08063	2.62857	2.94294	2.71834	3.13442	2.4009	2.67758	2.57474	2.8256	2.70871	2.96442	2.69651	2.87081	2.58809	2.80104	3.05791	2.92281	2.8313	2.65732	2.95516	Uncharacterized protein	101122078	JEQ12_009096										PF12796,PF00018	Ank_2|SH3_1	Ankyrin repeats (3 copies)|SH3 domain	IPR002110,IPR036770,IPR036028,IPR001452	Repeat|Homologous_superfamily|Homologous_superfamily|Domain
A0A6P3E0W8	JEQ12_008754	Protein Abitram	20.7818	A0A6P3E0W8;W5PAZ6	JEQ12_008754;ABITRAM	Protein Abitram	2.06781e-08	43.0091	-3.53862	-1.51189	-2.15223	-1.93305	-1.72165	-2.69723	-2.44209	-1.77791	-2.12454	-1.34755	-1.57174	-2.16488	-1.5562	-2.0444	-1.70308	-2.24531	-2.06299	-1.14162	-3.29954	-2.02702	-2.43858	-2.33676	-2.67489	-1.48969	Protein Abitram	101115428	JEQ12_008754	GO:0030426,GO:0030027	growth cone|lamellipodium								PF01597	GCV_H	Glycine cleavage H-protein	IPR039169,IPR033753,IPR011053	Family|Family|Homologous_superfamily
A0A6P3E0Y3	JEQ12_008819	Aminotransferase class I/classII domain-containing protein	52.8291	A0A6P3E0Y3;W5PDE3	JEQ12_008819;SPTLC1	Aminotransferase class I/classII domain-containing protein;Serine palmitoyltransferase long chain base subunit 1	2.99381e-20	48.0005	1.00358	1.27901	1.70294	1.37707	0.944181	1.24693	1.42605	1.55834	1.07063	1.50931	1.39928	1.5477	1.3429	1.36458	1.15311	1.29536	1.5579	1.58148	1.58903	1.00888	1.02444	1.26997	1.27093	1.37464	Aminotransferase class I/classII domain-containing protein	101105721	JEQ12_008819	GO:0009058,GO:0003824,GO:0030170	biosynthetic process|catalytic activity|pyridoxal phosphate binding	oas00600,oas04071	Sphingolipid metabolism|Sphingolipid signaling pathway	K00654					PF00155	Aminotran_1_2	Aminotransferase class I and II	IPR004839,IPR015424,IPR015421,IPR015422	Domain|Homologous_superfamily|Homologous_superfamily|Homologous_superfamily
A0A6P3E0Z7	CTSV	Cathepsin V	37.2399	A0A6P3E0Z7	CTSV	Cathepsin V	9.10719e-30	51.3131	3.54733	3.23157	3.25507	3.58725	3.40675	3.64689	3.25637	2.94666	3.69159	3.07164	3.43319	3.64612	3.74275	3.55183	3.42647	3.44435	3.33621	3.42762	3.5758	3.52537	3.38785	3.16288	3.6759	3.29924	Cathepsin V	780510	CTSV	GO:0006508,GO:0005764,GO:0008234	proteolysis|lysosome|cysteine-type peptidase activity	oas04145,oas04142,oas04140,oas04210,oas04612,oas05205,oas05323,oas05418	Phagosome|Lysosome|Autophagy - animal|Apoptosis|Antigen processing and presentation|Proteoglycans in cancer|Rheumatoid arthritis|Fluid shear stress and atherosclerosis	K01365					PF08246,PF00112	Inhibitor_I29|Peptidase_C1	Cathepsin propeptide inhibitor domain (I29)|Papain family cysteine protease	IPR038765,IPR025661,IPR000169,IPR025660,IPR013128,IPR000668,IPR039417,IPR013201	Homologous_superfamily|Active_site|Active_site|Active_site|Family|Domain|Domain|Domain
A0A6P3E105	HNRNPK	Heterogeneous nuclear ribonucleoprotein K	51.0192	A0A6P3E105;A0A6P7DMS2;A0A836AEZ3;W5Q2G6	HNRNPK;JEQ12_017556;JEQ12_008874;HNRNPK	Heterogeneous nuclear ribonucleoprotein K	2.12604e-21	48.4267	6.59543	6.81742	6.62231	6.74275	6.7955	7.0316	6.84907	6.62517	6.86807	6.83204	6.79315	6.64648	6.78908	6.76128	6.62693	6.59981	6.68084	6.58993	6.70281	6.79015	6.85399	6.79394	6.72663	6.75309	Heterogeneous nuclear ribonucleoprotein K	101117560	HNRNPK	GO:0005737,GO:0005654,GO:0002102,GO:0005681,GO:0003677,GO:0003723	cytoplasm|nucleoplasm|podosome|spliceosomal complex|DNA binding|RNA binding	oas03040,oas05206,oas05203	Spliceosome|MicroRNAs in cancer|Viral carcinogenesis	K12886	KOG2192	L	positive regulation of low-density lipoprotein particle receptor biosynthetic process	Replication, recombination and repair	PF00013,PF08067	KH_1|ROKNT	KH domain|ROKNT (NUC014) domain	IPR004087,IPR004088,IPR036612,IPR012987	Domain|Domain|Homologous_superfamily|Domain
A0A6P3E118	JEQ12_009353	Squalene synthase	48.3125	A0A6P3E118;W5Q0X2	JEQ12_009353;FDFT1	Squalene synthase	1.03479e-35	53.2144	1.48318	1.58291	1.90749	1.65533	1.96238	1.9876	2.28518	1.81866	1.87631	1.62133	2.02645	2.4411	1.78495	2.3159	2.50863	2.30346	1.57043	1.47686	1.91459	1.00261	1.69346	2.32217	2.18961	2.38898	Squalene synthase	101119109	JEQ12_009353	GO:0016126,GO:0016020,GO:0004310,GO:0051996	sterol biosynthetic process|membrane|farnesyl-diphosphate farnesyltransferase activity|squalene synthase activity	oas00100	Steroid biosynthesis	K00801					PF00494	SQS_PSY	Squalene/phytoene synthase	IPR008949,IPR002060,IPR006449,IPR019845,IPR044844,IPR033904	Homologous_superfamily|Family|Family|Conserved_site|Family|Domain
A0A6P3E145	JEQ12_008967	Uncharacterized protein	45.6832	A0A6P3E145;W5PLT1	JEQ12_008967;DOK2	Uncharacterized protein;Docking protein 2	7.52567e-16	46.2187	-2.64305	-2.56373	-1.99134	-2.17074	-2.11917	-1.95488	-1.58189	-1.17314	-1.47722	-1.50465	-0.946687	-1.8242	-1.82909	-1.71742	-1.23055	-2.55165	-1.61749	-1.28649	-1.88633	-1.04992	-1.57006	-1.84363	-2.20664	-1.3064	Uncharacterized protein	101119612	JEQ12_008967										PF02174,PF00169	IRS|PH	PTB domain (IRS-1 type)|PH domain	IPR037751,IPR002404,IPR011993,IPR001849	Domain|Domain|Homologous_superfamily|Domain
A0A6P3E146	JEQ12_009425	3-hydroxyisobutyryl-CoA hydrolase	43.386	A0A6P3E146;W5Q437	JEQ12_009425;HIBCH	3-hydroxyisobutyryl-CoA hydrolase	2.72783e-30	51.4852	1.84888	1.97714	1.60294	1.67706	1.95417	2.15082	2.20499	2.12403	2.09836	2.07283	1.70987	1.8246	1.9156	1.66088	1.81251	1.75245	1.88655	2.0137	2.02825	1.72258	2.20902	2.31183	2.06855	2.09874	3-hydroxyisobutyryl-CoA hydrolase	101111161	JEQ12_009425	GO:0006574,GO:0005739,GO:0003860	valine catabolic process|mitochondrion|3-hydroxyisobutyryl-CoA hydrolase activity	oas00640,oas00280,oas00410	Propanoate metabolism|Valine, leucine and isoleucine degradation|beta-Alanine metabolism	K05605					PF16113	ECH_2	Enoyl-CoA hydratase/isomerase	IPR029045,IPR045004,IPR032259	Homologous_superfamily|Domain|Family
A0A6P3E148	JEQ12_008991	Alpha-1,3/1,6-mannosyltransferase ALG2	46.8252	A0A6P3E148;W5PMS5	JEQ12_008991;ALG2	Alpha-1,3/1,6-mannosyltransferase ALG2;Alpha-1,3/1,6-mannosyltransferase ALG2	6.60453e-48	56.7043	-0.309527	-0.455205	-0.628572	-0.54325	-0.505652	-0.443982	-0.674748	-0.32157	-0.0889192	-0.551809	-0.560852	-0.732148	-0.394089	-0.658193	-0.449033	-0.613508	-0.583045	-0.566972	-0.923053	-0.846115	-0.776588	-0.620926	-0.648885	-0.746865	Alpha-1,3/1,6-mannosyltransferase ALG2	101101953	JEQ12_008991	GO:0006486,GO:0016020,GO:0004378,GO:0102704	protein glycosylation|membrane|GDP-Man:Man1GlcNAc2-PP-Dol alpha-1,3-mannosyltransferase activity|GDP-Man:Man2GlcNAc2-PP-dolichol alpha-1,6-mannosyltransferase activity	oas00510,oas00513	N-Glycan biosynthesis|Various types of N-glycan biosynthesis	K03843					PF13439,PF00534	Glyco_transf_4|Glycos_transf_1	Glycosyltransferase Family 4|Glycosyl transferases group 1	IPR027054,IPR001296,IPR028098	Family|Domain|Domain
A0A6P3E154	JEQ12_009006	Uncharacterized protein	91.8434	A0A6P3E154;W5PNL4;W5PNL6	JEQ12_009006;NCBP1;NCBP1	Uncharacterized protein;Nuclear cap binding protein subunit 1;Nuclear cap binding protein subunit 1	1.23175e-49	57.1513	0.160816	0.0178473	0.139094	0.409593	0.446415	0.293942	0.292753	0.365449	0.235063	0.377714	0.439167	0.314245	0.352675	0.26174	0.282724	0.432519	0.414853	0.430629	0.522261	0.27665	0.463884	0.456123	0.389355	0.471202	Uncharacterized protein	101104206	JEQ12_009006	GO:0006370,GO:0006406,GO:0008380,GO:0005846,GO:0005634,GO:0000339	7-methylguanosine mRNA capping|mRNA export from nucleus|RNA splicing|nuclear cap binding complex|nucleus|RNA cap binding	oas03040,oas03013,oas03015,oas05014	Spliceosome|Nucleocytoplasmic transport|mRNA surveillance pathway|Amyotrophic lateral sclerosis	K12882					PF02854,PF09088,PF09090	MIF4G|MIF4G_like|MIF4G_like_2	MIF4G domain|MIF4G like|MIF4G like	IPR016024,IPR027159,IPR015172,IPR015174,IPR003890	Homologous_superfamily|Family|Domain|Domain|Domain
A0A6P3E171	JEQ12_009055	Uncharacterized protein	269.754	A0A6P3E171	JEQ12_009055	Uncharacterized protein	4.19561e-44	55.6727	5.32786	5.31409	5.07682	5.36459	5.00707	5.46433	5.10438	5.24844	5.28143	5.1025	5.27873	5.27242	5.34861	5.37187	5.23588	5.13272	5.14543	5.35377	5.29295	5.38369	5.15438	5.33239	5.3849	5.33569	Uncharacterized protein	101114674	JEQ12_009055	GO:0007155,GO:0005737,GO:0005856,GO:0005925,GO:0001726,GO:0051015,GO:0005200	cell adhesion|cytoplasm|cytoskeleton|focal adhesion|ruffle|actin filament binding|structural constituent of cytoskeleton	oas04015,oas04510,oas04611,oas05166	Rap1 signaling pathway|Focal adhesion|Platelet activation|Human T-cell leukemia virus 1 infection	K06271					PF16511,PF00373,PF01608,PF09141,PF08913	FERM_f0|FERM_M|I_LWEQ|Talin_middle|VBS	N-terminal or F0 domain of Talin-head FERM|FERM central domain|I/LWEQ domain|Talin, middle domain|Vinculin Binding Site	IPR036723,IPR019749,IPR014352,IPR035963,IPR019748,IPR019747,IPR000299,IPR032425,IPR035964,IPR002558,IPR011993,IPR037438,IPR015224,IPR036476,IPR029071,IPR015009	Homologous_superfamily|Domain|Homologous_superfamily|Homologous_superfamily|Domain|Conserved_site|Domain|Domain|Homologous_superfamily|Domain|Homologous_superfamily|Domain|Domain|Homologous_superfamily|Homologous_superfamily|Domain
A0A6P3E181	JEQ12_009068	Band 7 domain-containing protein	38.7853	A0A6P3E181;W5PRD7	JEQ12_009068;STOML2	Band 7 domain-containing protein;Stomatin like 2	4.04014e-43	55.3938	3.0726	3.11958	2.99848	3.01134	2.87381	3.07379	3.00407	2.95721	2.97677	2.99556	2.92063	2.82261	3.30279	2.99939	3.0984	3.16498	2.98545	2.87536	3.37671	2.89068	2.93417	3.12574	3.09488	3.10727	Band 7 domain-containing protein	101118247	JEQ12_009068	GO:0016020	membrane								PF01145,PF16200	Band_7|Band_7_C	SPFH domain / Band 7 family|C-terminal region of band_7	IPR001107,IPR036013,IPR032435,IPR001972	Domain|Homologous_superfamily|Domain|Family
A0A6P3E192	HNRNPA3	Heterogeneous nuclear ribonucleoprotein A3	39.709	A0A6P3E192	HNRNPA3	Heterogeneous nuclear ribonucleoprotein A3	4.02168e-37	53.6449	5.79046	5.77221	5.66339	5.87026	5.82601	6.02866	5.77891	5.76017	5.74632	5.84028	5.90317	5.8027	5.8269	5.91592	5.76633	5.73285	5.68791	5.82222	5.67379	5.83442	5.74059	5.86252	5.81122	5.93745	Heterogeneous nuclear ribonucleoprotein A3	101105552	HNRNPA3	GO:0005634,GO:1990904,GO:0003723	nucleus|ribonucleoprotein complex|RNA binding	oas03040,oas05014	Spliceosome|Amyotrophic lateral sclerosis	K12741	KOG0118	H	RNA binding	Coenzyme transport and metabolism	PF00076	RRM_1	RNA recognition motif. (a.k.a. RRM, RBD, or RNP domain)	IPR034516,IPR012677,IPR035979,IPR000504	Domain|Homologous_superfamily|Homologous_superfamily|Domain
A0A6P3E196	JEQ12_009502	Endoplasmic reticulum junction formation protein lunapark	48.0614	A0A6P3E196;W5NPP8	JEQ12_009502;LNPK	Endoplasmic reticulum junction formation protein lunapark	5.35325e-28	50.7251	-0.152289	-0.384515	-0.853709	-0.528133	-0.883535	-0.496538	-1.06616	-0.672648	-1.13851	-0.670536	-1.17009	-0.992248	-0.18071	-1.15927	-0.843947	-0.350033	-1.26474	-0.934925	-0.597104	-0.36506	-0.975294	-0.699448	-0.682678	-1.29799	Endoplasmic reticulum junction formation protein lunapark	101107574	JEQ12_009502	GO:0071788,GO:1903373,GO:0098826,GO:0042802,GO:0046872	endoplasmic reticulum tubular network maintenance|positive regulation of endoplasmic reticulum tubular network organization|endoplasmic reticulum tubular network membrane|identical protein binding|metal ion binding								PF10058	zinc_ribbon_10	Predicted integral membrane zinc-ribbon metal-binding protein	IPR040115,IPR019273	Family|Domain
A0A6P3E198	JEQ12_009122	Structural maintenance of chromosomes protein 5	129.009	A0A6P3E198;W5PTQ4	JEQ12_009122;SMC5	Structural maintenance of chromosomes protein 5	1.4886e-40	54.6633	-1.31691	-1.43033	-1.53378	-1.73403	-1.60745	-1.74392	-1.47752	-1.76523	-1.63978	-1.66725	-1.27598	-1.63741	-1.51522	-1.42944	-1.25732	-1.82684	-1.85022	-1.43822	-1.89682	-1.37462	-1.40053	-1.37142	-1.77261	-1.36652	Structural maintenance of chromosomes protein 5	101104964	JEQ12_009122	GO:0000724,GO:0000781,GO:0005634,GO:0030915,GO:0005524,GO:0016887	double-strand break repair via homologous recombination|chromosome, telomeric region|nucleus|Smc5-Smc6 complex|ATP binding|ATP hydrolysis activity								PF02463	SMC_N	RecF/RecN/SMC N terminal domain	IPR027417,IPR003395,IPR027131	Homologous_superfamily|Domain|Family
A0A6P3E1A2	JEQ12_009131	Frataxin, mitochondrial	23.4844	A0A6P3E1A2;W5PU52	JEQ12_009131;FXN	Frataxin, mitochondrial;Frataxin, mitochondrial	2.11852e-10	43.8435	0.890623	0.0712655	-0.215496	0.526667	0.0374443	0.203503	0.235754	-0.000898188	0.609802	-0.231551	-0.318077	0.987383	1.07981	0.482114	-0.194317	-0.485435	0.295465	-0.117616	1.05765	0.641944	0.778061	0.426282	0.570937	-0.513492	Frataxin, mitochondrial	101107413	JEQ12_009131	GO:0006783,GO:0006879,GO:0034755,GO:0016226,GO:0005739,GO:0008199,GO:0004322	heme biosynthetic process|intracellular iron ion homeostasis|iron ion transmembrane transport|iron-sulfur cluster assembly|mitochondrion|ferric iron binding|ferroxidase activity	oas00860	Porphyrin metabolism	K19054					PF01491	Frataxin_Cyay	Frataxin-like domain	IPR017789,IPR002908,IPR036524,IPR020895	Family|Family|Homologous_superfamily|Conserved_site
A0A6P3E1C3	JEQ12_009170	E3 ubiquitin-protein ligase UHRF	89.9417	A0A6P3E1C3;W5PW09;W5PW10	JEQ12_009170;UHRF2;UHRF2	E3 ubiquitin-protein ligase UHRF	7.70579e-29	51.0061	-0.53262	-0.790357	-0.548485	-0.749028	-0.855363	-0.618946	-0.478456	-0.662237	-0.876294	-0.747177	-0.339939	-0.722852	-0.87564	-0.69779	-0.555753	-1.07964	-0.511934	-0.510654	-0.810824	-0.768742	-0.7785	-0.452736	-0.737898	-0.481568	E3 ubiquitin-protein ligase UHRF	101117220	JEQ12_009170	GO:0007049,GO:0016567,GO:0005634,GO:0003677,GO:0046872,GO:0016740	cell cycle|protein ubiquitination|nucleus|DNA binding|metal ion binding|transferase activity								PF00628,PF02182,PF12148,PF00240	PHD|SAD_SRA|TTD|ubiquitin	PHD-finger|SAD/SRA domain|Tandem tudor domain within UHRF1|Ubiquitin family	IPR015947,IPR036987,IPR003105,IPR021991,IPR000626,IPR029071,IPR045134,IPR011011,IPR001965,IPR019787,IPR001841,IPR013083,IPR017907	Homologous_superfamily|Homologous_superfamily|Domain|Domain|Domain|Homologous_superfamily|Family|Homologous_superfamily|Domain|Domain|Domain|Homologous_superfamily|Conserved_site
A0A6P3E1E5	JEQ12_009584	Uncharacterized protein	77.5306	A0A6P3E1E5;W5PBD1	JEQ12_009584;MARCHF7	Uncharacterized protein;Membrane associated ring-CH-type finger 7	0.000468778	37.4956	-4.09879	-3.48616	-2.94704	-4.53603	-2.94966	-3.83774	-3.8982	-3.47435	-3.01671	-2.58203	-2.88477	-1.46824	-2.80288	-2.929	-3.84549	-2.12766	-3.71661	-3.89928	-2.44561	-3.95607	-3.02971	-2.53492	-3.36399	-2.65986	Uncharacterized protein	101110480	JEQ12_009584	GO:0008270	zinc ion binding								PF12906	RINGv	RING-variant domain	IPR011016,IPR013083	Domain|Homologous_superfamily
A0A6P3E1G5	JEQ12_009383	Uncharacterized protein	22.5661	A0A6P3E1G5;A0A836A7T8;W5P1J5;W5PHX9	JEQ12_009383;JEQ12_004553;COMMD7;LOC101123441	Uncharacterized protein;COMM domain-containing protein;COMM domain containing 7;COMM domain-containing protein 7-like	0.00194638	33.1874	-0.129881	-1.12844	-1.80937	0.310472	-1.10931	-2.01814	-1.00627	-0.396158	-0.531596	-1.62087	-1.09493	-1.67411	-1.67835	-0.236856	0.246224	-0.133387	-0.456458	-0.44863	-0.630043	-0.46565	-1.35465	-0.224678	0.0706295	-0.0196207	Uncharacterized protein	101123441	JEQ12_009383										PF07258	COMM_domain	COMM domain	IPR017920,IPR037358	Domain|Family
A0A6P3E1H6	JEQ12_009677	Uncharacterized protein	10.0214	A0A6P3E1H6	JEQ12_009677	Uncharacterized protein	3.83696e-23	49.0559	5.30163	5.21578	5.23589	5.30878	5.18461	5.19829	5.37804	5.61485	5.24921	5.36139	4.96736	5.44241	5.19468	5.20362	5.16648	5.26821	5.34229	5.108	5.18892	5.2408	5.43869	5.1071	5.26611	5.1494	Uncharacterized protein	101111606	JEQ12_009677	GO:0000062	fatty-acyl-CoA binding	oas03320	PPAR signaling pathway	K08762					PF00887	ACBP	Acyl CoA binding protein	IPR022408,IPR000582,IPR035984,IPR014352	Conserved_site|Domain|Homologous_superfamily|Homologous_superfamily
A0A6P3E1H8	ORMDL1	ORM1-like protein	17.3614	A0A6P3E1H8;A0A6P3E9I6	ORMDL1;JEQ12_009430	ORM1-like protein	1.56704e-26	50.2304	-0.457067	-0.738731	-0.081473	-0.399623	-0.415453	-0.980854	-0.208271	-1.02363	-0.886182	-0.612017	-0.720952	-0.665192	-0.451858	-1.25161	-1.42924	-0.363237	-0.197048	-0.604266	-0.635036	-1.20252	-1.48563	-0.574085	-0.759071	-0.938249	ORM1-like protein	101112289	ORMDL1	GO:0006629,GO:2000303,GO:0005789	lipid metabolic process|regulation of ceramide biosynthetic process|endoplasmic reticulum membrane				KOG3319	P	negative regulation of ceramide biosynthetic process	Inorganic ion transport and metabolism	PF04061	ORMDL	ORMDL family	IPR007203	Family
A0A6P3E1I7	JEQ12_009712	Uncharacterized protein	47.062	A0A6P3E1I7;W5PXP2	JEQ12_009712;CAVIN2	Uncharacterized protein;Caveolae associated protein 2	2.19503e-27	50.519	3.37656	3.52327	3.00187	3.55192	2.90039	3.42925	3.45938	3.21138	3.24596	2.87412	3.22877	3.51232	2.95971	3.58224	3.59941	3.34455	3.3853	3.70345	3.13998	3.89871	3.21296	3.49367	3.2249	3.4061	Uncharacterized protein	101118507	JEQ12_009712	GO:0005901	caveola								PF15237	PTRF_SDPR	PTRF/SDPR family	IPR026752	Family
A0A6P3E1K1	JEQ12_009484	Tetratricopeptide repeat protein 30	76.3171	A0A6P3E1K1	JEQ12_009484	Tetratricopeptide repeat protein 30	1.12125e-21	48.5281	-0.646036	-0.919252	-1.77591	-1.85961	-1.64877	-1.59454	-3.11424	-1.43456	0.195439	-0.488794	-1.38277	-1.45579	-1.46003	-0.921046	-0.555567	-0.360028	-0.64947	-0.132008	0.67208	-0.597692	-1.33778	0.47741	-1.50247	-0.824837	Tetratricopeptide repeat protein 30	101104041	JEQ12_009484	GO:0042073,GO:0005879	intraciliary transport|axonemal microtubule											IPR011990,IPR019734,IPR039941	Homologous_superfamily|Repeat|Family
A0A6P3E1Q0	JEQ12_009821	Fibronectin	252.524	A0A6P3E1Q0	JEQ12_009821	Fibronectin	1.88673e-37	53.7454	5.35873	5.72245	4.91572	5.10324	4.60637	4.71469	4.86449	5.09155	5.10354	4.75936	4.91813	5.28124	4.86865	5.44943	5.5395	5.36887	5.04084	4.88785	5.32691	5.45222	4.81967	4.80875	5.20083	5.37676	Fibronectin	100216462	JEQ12_009821	GO:0006953,GO:0007155,GO:0008360,GO:0005576,GO:0008201	acute-phase response|cell adhesion|regulation of cell shape|extracellular region|heparin binding	oas04151,oas04512,oas04510,oas04810,oas05200,oas05205,oas05222,oas05165,oas05135,oas05100,oas05146,oas04933	PI3K-Akt signaling pathway|ECM-receptor interaction|Focal adhesion|Regulation of actin cytoskeleton|Pathways in cancer|Proteoglycans in cancer|Small cell lung cancer|Human papillomavirus infection|Yersinia infection|Bacterial invasion of epithelial cells|Amoebiasis|AGE-RAGE signaling pathway in diabetic complications	K05717					PF00039,PF00040,PF00041	fn1|fn2|fn3	Fibronectin type I domain|Fibronectin type II domain|Fibronectin type III domain	IPR000083,IPR003961,IPR036116,IPR000562,IPR036943,IPR013783,IPR013806	Domain|Domain|Homologous_superfamily|Domain|Homologous_superfamily|Homologous_superfamily|Homologous_superfamily
A0A6P3E1R6	JEQ12_009865	AN1-type domain-containing protein	28.0045	A0A6P3E1R6;A0A6P7DQI2	JEQ12_009865;ZFAND2B	AN1-type domain-containing protein;Zinc finger AN1-type containing 2B	6.21943e-19	47.493	2.05123	2.18783	2.20756	2.23418	2.17952	2.35288	2.28134	2.21771	2.07727	2.13422	2.35091	2.42269	1.88883	2.23774	2.32709	2.15136	2.29851	2.11065	2.06573	2.14589	2.38732	2.23364	2.14018	2.25448	AN1-type domain-containing protein	101114680	JEQ12_009865	GO:0008270	zinc ion binding								PF02809,PF01428	UIM|zf-AN1	Ubiquitin interaction motif|AN1-like Zinc finger	IPR035896,IPR003903,IPR000058	Homologous_superfamily|Conserved_site|Domain
A0A6P3E1S2	JEQ12_009603	Uncharacterized protein	105.789	A0A6P3E1S2;W5PE89	JEQ12_009603;PRPF40A	Uncharacterized protein;Pre-mRNA processing factor 40 homolog A	2.53026e-37	53.7069	0.832037	0.813564	0.988131	1.0218	0.945217	1.12933	1.02574	0.872805	0.898007	1.02199	0.882152	0.939898	0.917322	1.17184	0.98879	0.938353	0.960984	0.955403	0.783268	0.872749	1.04095	0.935726	1.00846	1.07447	Uncharacterized protein	101116380	JEQ12_009603	GO:0045292,GO:0005634	mRNA cis splicing, via spliceosome|nucleus	oas03040	Spliceosome	K12821					PF01846,PF00397	FF|WW	FF domain|WW domain	IPR002713,IPR036517,IPR039726,IPR001202,IPR036020	Domain|Homologous_superfamily|Family|Domain|Homologous_superfamily
A0A6P3E1S8	JEQ12_009613	Rho-related GTP-binding protein RhoE	27.3682	A0A6P3E1S8;W5PHI3	JEQ12_009613;LOC101120386	Rho-related GTP-binding protein RhoE	2.03399e-40	54.6221	-0.80214	-0.556302	-0.314321	-0.378884	-0.475106	-0.13444	-0.638813	-0.424708	-0.424337	-0.0895371	-0.0661228	-0.756754	-0.484934	-0.380517	-0.411968	-0.559433	-0.347209	-0.369627	-0.656381	-0.7553	-0.583807	-0.372788	-0.323809	-0.16038	Rho-related GTP-binding protein RhoE	101120386	JEQ12_009613	GO:0007264,GO:0005525,GO:0003924	small GTPase mediated signal transduction|GTP binding|GTPase activity								PF00071	Ras	Ras family	IPR027417,IPR041843,IPR005225,IPR001806,IPR003578	Homologous_superfamily|Family|Domain|Family|Family
A0A6P3E1U0	LOC106991292	RB binding protein 4, chromatin remodeling factor	47.6557	A0A6P3E1U0;A0A6P7DI30	LOC106991292;JEQ12_009972	RB binding protein 4, chromatin remodeling factor;Histone-binding protein RBBP4 N-terminal domain-containing protein	3.30598e-44	55.7017	3.0124	2.62598	2.8096	2.96726	2.78118	2.89373	2.84845	2.67982	2.80273	2.8797	2.84374	2.89919	3.18319	2.88079	2.93457	2.93582	2.86161	2.78183	3.05201	3.0205	2.92239	3.05941	3.09229	3.03692	RB binding protein 4, chromatin remodeling factor	101112378	LOC106991292	GO:0005634	nucleus	oas04218	Cellular senescence	K10752	KOG0264	K	chromatin organization	Transcription	PF12265,PF00400	CAF1C_H4-bd|WD40	Histone-binding protein RBBP4 or subunit C of CAF1 complex|WD domain, G-beta repeat	IPR020472,IPR022052,IPR015943,IPR001680,IPR019775,IPR036322	Repeat|Domain|Homologous_superfamily|Repeat|Conserved_site|Homologous_superfamily
A0A6P3E1W3	JEQ12_010021	tRNA selenocysteine 1-associated protein 1	32.4945	A0A6P3E1W3;W5NXX0	JEQ12_010021;TRNAU1AP	tRNA selenocysteine 1-associated protein 1	0.00966065	24.7185		-5.75359	-7.17901	-7.01509	-5.65876	-6.58232	-7.54956									-5.34707						-4.70545			tRNA selenocysteine 1-associated protein 1	101102703	JEQ12_010021	GO:0005737,GO:0005634,GO:0003723	cytoplasm|nucleus|RNA binding								PF00076,PF17654	RRM_1|Trnau1ap	RNA recognition motif. (a.k.a. RRM, RBD, or RNP domain)|Selenocysteine tRNA 1 associated proteins	IPR012677,IPR035979,IPR000504,IPR034510,IPR040434,IPR041085	Homologous_superfamily|Homologous_superfamily|Domain|Domain|Family|Domain
A0A6P3E1W5	JEQ12_009721	Uncharacterized protein	101	A0A6P3E1W5;W5Q029	JEQ12_009721;GTF3C3	Uncharacterized protein;General transcription factor IIIC subunit 3	1.21729e-18	47.3779	-0.163063	-0.791178	0.292516	0.029748	0.596323	-0.0304062	0.274281	-0.0462281	-0.198691	0.210358	0.332708	0.0633144	0.133029	0.185218	-0.0240112	0.213994	0.114135	0.274271	-0.478208	-0.198995	0.291656	0.134293	0.183136	0.0238219	Uncharacterized protein	101120220	JEQ12_009721	GO:0006383	transcription by RNA polymerase III								PF13181	TPR_8	Tetratricopeptide repeat	IPR039340,IPR011990,IPR019734	Family|Homologous_superfamily|Repeat
A0A6P3E1X4	JEQ12_010048	Sodium/hydrogen exchanger	90.9131	A0A6P3E1X4;W5P0Z4;W5P0Z9	JEQ12_010048;SLC9A1;SLC9A1	Sodium/hydrogen exchanger	1.81482e-07	42.5194	-0.0076089	0.454566	-0.164618	0.189838	-0.103276	0.0674385	-0.318145	0.0146572	-0.117555	-0.109914	-0.381665	0.421554	-0.0126867	-0.324923	-0.0979481	-0.206522	-0.0548145	-0.638661	-0.00949809	-0.208129	-0.00681697	-0.197941	-0.104911	-0.337182	Sodium/hydrogen exchanger	494435	JEQ12_010048	GO:0006885,GO:0005886,GO:0015385	regulation of pH|plasma membrane|sodium:proton antiporter activity	oas04371,oas04024,oas04810,oas04919,oas04260,oas04261,oas04970,oas04971,oas04972,oas04976,oas05205	Apelin signaling pathway|cAMP signaling pathway|Regulation of actin cytoskeleton|Thyroid hormone signaling pathway|Cardiac muscle contraction|Adrenergic signaling in cardiomyocytes|Salivary secretion|Gastric acid secretion|Pancreatic secretion|Bile secretion|Proteoglycans in cancer	K05742					PF00999,PF16644	Na_H_Exchanger|NEXCaM_BD	Sodium/hydrogen exchanger family|Regulatory region of Na+/H+ exchanger NHE binds to calmodulin	IPR006153,IPR018422,IPR004709,IPR001970,IPR032103	Domain|Family|Family|Family|Domain
A0A6P3E1Y4	STMN1	Stathmin	17.3025	A0A6P3E1Y4;A0A836AEH1	STMN1;JEQ12_010078	Stathmin	6.77537e-23	48.9679	3.28824	3.24553	3.67555	3.9274	3.56597	3.86652	3.77151	3.00989	3.30201	3.90725	3.47981	3.73223	3.35638	3.67772	3.47843	3.42077	3.06134	3.46455	3.50853	2.85034	3.72414	3.42828	3.52003	3.13108	Stathmin	101113917	STMN1	GO:0031110	regulation of microtubule polymerization or depolymerization	oas04010,oas05206	MAPK signaling pathway|MicroRNAs in cancer	K04381	KOG1280	O	microtubule depolymerization	Posttranslational modification, protein turnover, chaperones	PF00836	Stathmin	Stathmin family	IPR030514,IPR000956,IPR036002	Conserved_site|Family|Homologous_superfamily
A0A6P3E1Y6	JEQ12_010091	Chloride intracellular channel protein	28.713	A0A6P3E1Y6;W5P8X9	JEQ12_010091;CLIC4	Chloride intracellular channel protein	3.88593e-34	52.7243	2.8709	3.21034	2.83829	3.12516	3.24214	3.2363	3.01568	3.09579	3.04882	3.17378	3.06918	3.00646	3.11968	3.22292	3.1385	2.93107	2.98257	3.16116	2.7004	2.98188	3.12082	3.34633	3.18116	3.29261	Chloride intracellular channel protein	101115514	JEQ12_010091	GO:0034765,GO:0034707,GO:0005737,GO:0005254,GO:0005244	regulation of monoatomic ion transmembrane transport|chloride channel complex|cytoplasm|chloride channel activity|voltage-gated monoatomic ion channel activity								PF13410	GST_C_2	Glutathione S-transferase, C-terminal domain	IPR002946,IPR010987,IPR036282,IPR040079,IPR036249	Family|Domain|Homologous_superfamily|Family|Homologous_superfamily
A0A6P3E209	JEQ12_009849	Mitochondrial chaperone BCS1	47.4632	A0A6P3E209;A0A6P3TI08	JEQ12_009849;LOC101111607	Mitochondrial chaperone BCS1	2.201e-19	47.6686	0.345961	0.00788415	0.297623	0.0644629	0.248832	0.15773	0.292415	0.294546	0.105618	0.440092	0.359622	0.0539029	0.169482	0.00789908	0.397766	0.217169	0.449633	0.254909	-0.0556706	-0.216679	0.505409	0.0774541	0.102464	0.20157	Mitochondrial chaperone BCS1	101111607	JEQ12_009849	GO:0005743,GO:0005524,GO:0016887	mitochondrial inner membrane|ATP binding|ATP hydrolysis activity								PF00004,PF08740	AAA|BCS1_N	ATPase family associated with various cellular activities (AAA)|BCS1 N terminal	IPR003593,IPR003959,IPR003960,IPR014851,IPR027417	Domain|Domain|Conserved_site|Domain|Homologous_superfamily
A0A6P3E215	LRRC8A	Leucine rich repeat containing 8 VRAC subunit A	94.0105	A0A6P3E215;A0A6P3TA94	LRRC8A;JEQ12_013496	Leucine rich repeat containing 8 VRAC subunit A;LRRC8 pannexin-like TM region domain-containing protein	6.88047e-32	52.0078	-0.476983	-0.527992	-0.423638	-0.300454	-0.416745	-0.547162	-0.966853	-0.516027	-0.689952	-0.436522	-0.406516	-0.706287	-0.697414	-0.282588	-0.485909	-0.549178	-0.880716	-0.623481	-0.328015	-0.322013	-0.323487	-0.379484	-0.889995	-0.362316	Leucine rich repeat containing 8 VRAC subunit A	101117230	LRRC8A	GO:0098656,GO:0005886	monoatomic anion transmembrane transport|plasma membrane				KOG0619	U	regulation of response to stimulus	Intracellular trafficking, secretion, and vesicular transport	PF13855,PF12534	LRR_8|Pannexin_like	Leucine rich repeat|Pannexin-like TM region of LRRC8	IPR001611,IPR003591,IPR032675,IPR021040	Repeat|Repeat|Homologous_superfamily|Domain
A0A6P3E216	JEQ12_009869	Glycoside hydrolase 35 catalytic domain-containing protein	73.2837	A0A6P3E216;W5QFF0	JEQ12_009869;GLB1L	Glycoside hydrolase 35 catalytic domain-containing protein;Galactosidase beta 1 like	0.00215759	32.5633	-1.17645	0.531738	-1.9865	-1.70656	-2.10476	-1.28369	-1.34415	-0.383877	-0.420939	0.276437	-0.0113476	-0.375488	0.0219108	-0.875292	-0.833851	-0.725575	-1.23592	-1.19185	0.191485	-1.09121	-1.1159	-0.114522	-0.484703	-0.611421	Glycoside hydrolase 35 catalytic domain-containing protein	101115764	JEQ12_009869	GO:0005975,GO:0005764,GO:0004565	carbohydrate metabolic process|lysosome|beta-galactosidase activity								PF01301	Glyco_hydro_35	Glycosyl hydrolases family 35	IPR026283,IPR008979,IPR031330,IPR001944,IPR017853	Family|Homologous_superfamily|Domain|Family|Homologous_superfamily
A0A6P3E217	JEQ12_013519	EF-hand domain-containing protein	55.2868	A0A6P3E217	JEQ12_013519	EF-hand domain-containing protein	0.00284833	30.7649	0.338667	0.985864	0.130115	0.910129	0.838038	0.862436	0.965974	1.20894	1.01777	0.283251	0.297656	0.143612	0.139372	0.999002	2.03753	1.0284	1.48051	0.752392	0.52907	0.481388	1.34388	1.04447	0.796398	1.15296	EF-hand domain-containing protein	101121668	JEQ12_013519	GO:0055085,GO:0005743,GO:0005509	transmembrane transport|mitochondrial inner membrane|calcium ion binding								PF13499,PF00153	EF-hand_7|Mito_carr	EF-hand domain pair|Mitochondrial carrier protein	IPR011992,IPR002048,IPR002167,IPR002067,IPR018108,IPR023395	Homologous_superfamily|Domain|Family|Family|Repeat|Homologous_superfamily
A0A6P3E230	AK2	Adenylate kinase 2, mitochondrial	25.5786	A0A6P3E230;W5QI77	AK2	Adenylate kinase 2, mitochondrial;Adenylate kinase 2, mitochondrial	8.49999e-33	52.2992	3.92515	4.06435	3.93492	3.89312	3.98029	4.07834	4.02546	3.89463	4.05298	4.03073	3.75523	4.10128	4.08297	4.15972	3.99189	4.13555	3.89017	3.80782	3.92036	4.01977	4.18594	4.04544	4.10587	4.09714	Adenylate kinase 2, mitochondrial	101110653	AK2	GO:0006172,GO:0046033,GO:0046034,GO:0016310,GO:0005758,GO:0004017,GO:0005524	ADP biosynthetic process|AMP metabolic process|ATP metabolic process|phosphorylation|mitochondrial intermembrane space|adenylate kinase activity|ATP binding	oas00230,oas00730	Purine metabolism|Thiamine metabolism	K00939					PF00406,PF05191	ADK|ADK_lid	Adenylate kinase|Adenylate kinase, active site lid	IPR006259,IPR000850,IPR033690,IPR007862,IPR028587,IPR027417	Family|Family|Conserved_site|Domain|Family|Homologous_superfamily
A0A6P3E232	JEQ12_013570	Phosducin thioredoxin-like domain-containing protein	34.3526	A0A6P3E232;W5PX23	JEQ12_013570;PDCL	Phosducin thioredoxin-like domain-containing protein;Phosducin like	0.000585745	37.0894	-0.687482	-1.72253	-2.75266	-1.32684	-1.09633	-0.953069	-1.16609	-1.02237	-0.96995	-1.46467	-1.61637	-1.74564	-1.0179	-1.45607	-1.06541	-1.39856	-0.967351	-0.616622	-0.0988178	-1.18897	-1.47719	-1.2962	-1.71792	-1.56005	Phosducin thioredoxin-like domain-containing protein	101111173	JEQ12_013570	GO:0008277,GO:0007601	regulation of G protein-coupled receptor signaling pathway|visual perception								PF02114	Phosducin	Phosducin	IPR001200,IPR023196,IPR024253,IPR036249	Family|Homologous_superfamily|Domain|Homologous_superfamily
A0A6P3E237	JEQ12_013629	Uncharacterized protein	60.0818	A0A6P3E237;W5PZH8	JEQ12_013629;MBOAT2	Uncharacterized protein;Membrane bound O-acyltransferase domain containing 2	2.94563e-18	47.2249	1.63461	1.1122	2.55746	1.63671	2.50952	1.69581	2.28412	2.15474	2.28366	1.24389	1.58658	2.37917	2.13869	1.8809	2.53707	2.94961	1.20994	1.747	2.04507	0.987464	1.14582	2.20506	2.74981	2.43734	Uncharacterized protein	101116033	JEQ12_013629	GO:0016020	membrane	oas00561,oas00564	Glycerolipid metabolism|Glycerophospholipid metabolism	K13517					PF03062	MBOAT	MBOAT, membrane-bound O-acyltransferase family	IPR004299	Family
A0A6P3E242	JEQ12_010002	Uncharacterized protein	39.3516	A0A6P3E242	JEQ12_010002	Uncharacterized protein	5.3073e-40	54.5021	1.34499	1.50365	1.48707	1.54904	1.69093	1.65349	1.54421	1.59733	1.69544	1.62499	1.64593	1.49236	1.52009	1.58211	1.60473	1.61066	1.42244	1.58353	1.28131	1.5562	1.75775	1.67698	1.62827	1.68458	Uncharacterized protein	101120474	JEQ12_010002			oas03040	Spliceosome	K12857					PF00400	WD40	WD domain, G-beta repeat	IPR020472,IPR015943,IPR001680,IPR019775,IPR036322	Repeat|Homologous_superfamily|Repeat|Conserved_site|Homologous_superfamily
A0A6P3E250	JEQ12_013698	Uncharacterized protein	14.5849	A0A6P3E250;W5Q8S3	JEQ12_013698;SF3B6	Uncharacterized protein;Splicing factor 3b subunit 6	8.53755e-26	49.9788	-1.1787	-0.889403	-0.66668	-0.831541	-0.558347	-0.808904	-0.721394	-1.02959	-0.800217	-0.683852	-1.00564	-0.758751	-0.705275	-0.982686	-1.35288	-0.87333	-1.11138	-0.798329	-0.332177	-0.742503	-0.877281	-0.919384	-0.853389	-1.3842	Uncharacterized protein	101105990	JEQ12_013698	GO:0005634,GO:0003723	nucleus|RNA binding	oas03040	Spliceosome	K12833					PF00076	RRM_1	RNA recognition motif. (a.k.a. RRM, RBD, or RNP domain)	IPR012677,IPR035979,IPR000504,IPR034150	Homologous_superfamily|Homologous_superfamily|Domain|Domain
A0A6P3E270	RBKS	Ribokinase	34.5794	A0A6P3E270;W5QDU7	RBKS	Ribokinase	4.10147e-29	51.0968	-0.624665	-0.915559	-1.12665	-1.28664	-1.12671	-0.800503	-1.04221	-1.34956	-1.14463	-1.00177	-1.35566	-0.32123	-0.686321	-0.970513	-0.571193	-0.641792	-1.2224	-0.914214	-0.606162	-0.398398	-1.52435	-1.27435	-1.08872	-0.867745	Ribokinase	101120994	RBKS	GO:0019303,GO:0006753,GO:0005737,GO:0005634,GO:0005524,GO:0046872,GO:0004747	D-ribose catabolic process|nucleoside phosphate metabolic process|cytoplasm|nucleus|ATP binding|metal ion binding|ribokinase activity	oas00030	Pentose phosphate pathway	K00852					PF00294	PfkB	pfkB family carbohydrate kinase	IPR002173,IPR011877,IPR011611,IPR002139,IPR029056	Conserved_site|Family|Domain|Family|Homologous_superfamily
A0A6P3E274	JEQ12_013770	Uncharacterized protein	60.9721	A0A6P3E274;W5QEK8	JEQ12_013770;EHD3	Uncharacterized protein;EH domain containing 3	1.50643e-17	46.9372	-0.436008	-0.45424	-0.00581204	-0.71454	-0.375496	-0.270708	-0.154579	-0.0609082	-0.2569	-0.0850814	-0.352183	-0.342495	-0.0731094	-0.321099	-0.152418	-0.330808	0.00873265	-0.569849	-0.220758	-0.0736166	-0.151815	-0.463855	-0.693074	-0.147812	Uncharacterized protein	101104895	JEQ12_013770	GO:0010008,GO:0005886,GO:0005524,GO:0005509,GO:0005525	endosome membrane|plasma membrane|ATP binding|calcium ion binding|GTP binding	oas04144	Endocytosis	K12476					PF18150,PF00350,PF12763,PF16880	DUF5600|Dynamin_N|EF-hand_4|EHD_N	Domain of unknown function (DUF5600)|Dynamin family|Cytoskeletal-regulatory complex EF hand|N-terminal EH-domain containing protein	IPR040990,IPR045063,IPR011992,IPR018247,IPR002048,IPR000261,IPR031692,IPR030381,IPR027417	Domain|Domain|Homologous_superfamily|Binding_site|Domain|Domain|Domain|Domain|Homologous_superfamily
A0A6P3E279	JEQ12_013775	Putative treble-clef zinc-finger domain-containing protein	63.9625	A0A6P3E279;A0A836A6T6	JEQ12_013775;C3H2orf42	Putative treble-clef zinc-finger domain-containing protein;Chromosome 3 C2orf42 homolog	8.93063e-23	48.9244	-4.82434	-5.65768	-5.55863	-4.83202	-5.54444	-4.15011	-5.87361	-5.19775	-5.15142	-3.92703	-5.34031	-5.23107	-5.78721	-4.68283	-5.39405	-3.91488	-5.01807	-4.33326	-4.30826	-5.48669	-4.89266	-4.73506	-4.96065	-5.248	Putative treble-clef zinc-finger domain-containing protein	101106066	JEQ12_013775										PF14952	zf-tcix	Putative treble-clef, zinc-finger, Zn-binding	IPR026049,IPR029269	Family|Domain
A0A6P3E2A2	JEQ12_013330	Uncharacterized protein	15.1365	A0A6P3E2A2;A0A6P3TMN5;W5P4I4;W5QC24	JEQ12_013330;JEQ12_004502;LOC101121190;MRPL41	Uncharacterized protein;Uncharacterized protein;39S ribosomal protein L41, mitochondrial-like;Mitochondrial ribosomal protein L41	2.22495e-09	43.4369	-1.02173	-2.82467	-3.1019	-2.03033	-3.39375	-2.65273	-1.14422	-2.41465	-2.84192	-2.38264	-2.72695	-2.43588	-0.278462	-1.52416	-1.83259	-1.41873	-2.12792	-1.49473	-0.26429	-2.14268	-2.44128	-1.95031	-1.04823	-3.50121	Uncharacterized protein	101108465	JEQ12_013330	GO:0005762,GO:0003735	mitochondrial large ribosomal subunit|structural constituent of ribosome								PF09809	MRP-L27	Mitochondrial ribosomal protein L27	IPR019189	Family
A0A6P3E2B5	JEQ12_013494	dolichol kinase	59.1596	A0A6P3E2B5;W5QCP5	JEQ12_013494;DOLK	dolichol kinase	0.000914969	36.1115			-2.33977		-3.08473			-3.88368	-3.89335	-2.55583	-3.83205	-3.16396	-3.00337	-3.35889	-2.13048	-2.50218	-1.90176					-3.50787	-3.55467	-3.4684	dolichol kinase	101116296	JEQ12_013494	GO:0016310,GO:0005783,GO:0016020,GO:0004168	phosphorylation|endoplasmic reticulum|membrane|dolichol kinase activity	oas00510	N-Glycan biosynthesis	K00902								IPR032974	Family
A0A6P3E2D0	JEQ12_013907	DNA-directed RNA polymerase subunit beta	128.226	A0A6P3E2D0	JEQ12_013907	DNA-directed RNA polymerase subunit beta	9.00623e-23	48.9231	-1.60319	-1.16537	-1.01965	-0.875646	-0.999532	-1.02336	-0.66748	-1.60299	-1.71242	-1.05674	-1.15916	-1.31077	-1.04919	-1.64818	-1.27261	-1.52243	-0.959796	-0.813671	-0.968231	-1.37875	-1.15055	-1.31985	-1.19495	-0.978445	DNA-directed RNA polymerase subunit beta	101113481	JEQ12_013907	GO:0006351,GO:0000428,GO:0005634,GO:0003677,GO:0003899,GO:0032549	DNA-templated transcription|DNA-directed RNA polymerase complex|nucleus|DNA binding|DNA-directed 5'-3' RNA polymerase activity|ribonucleoside binding	oas03020	RNA polymerase	K03002					PF06883,PF04563,PF04561,PF04565,PF00562,PF04560	RNA_pol_Rpa2_4|RNA_pol_Rpb2_1|RNA_pol_Rpb2_2|RNA_pol_Rpb2_3|RNA_pol_Rpb2_6|RNA_pol_Rpb2_7	RNA polymerase I, Rpa2 specific domain |RNA polymerase beta subunit|RNA polymerase Rpb2, domain 2|RNA polymerase Rpb2, domain 3|RNA polymerase Rpb2, domain 6|RNA polymerase Rpb2, domain 7	IPR015712,IPR007120,IPR037033,IPR007121,IPR007644,IPR007642,IPR037034,IPR007645,IPR007641,IPR014724,IPR009674	Family|Domain|Homologous_superfamily|Conserved_site|Domain|Domain|Homologous_superfamily|Domain|Domain|Homologous_superfamily|Domain
A0A6P3E2E2	JEQ12_013948	Cilia- and flagella-associated protein 36	39.5398	A0A6P3E2E2;W5NWA1	JEQ12_013948;CFAP36	Cilia- and flagella-associated protein 36	3.55962e-30	51.4476	-0.780321	-0.522669	-0.595842	-0.980474	-0.467375	-0.487657	-0.673797	-0.869853	-0.187315	-0.550547	-0.648354	-0.67521	-0.600092	-0.902604	-0.656725	-0.5275	-0.520431	-0.345434	-0.716564	-0.569786	-0.460519	-0.453202	-0.541484	-0.796568	Cilia- and flagella-associated protein 36	101121587	JEQ12_013948	GO:0005929,GO:0005737	cilium|cytoplasm								PF11527	ARL2_Bind_BART	The ARF-like 2 binding protein BART	IPR023379,IPR042541,IPR038888	Domain|Homologous_superfamily|Family
A0A6P3E2F7	JEQ12_013634	Uncharacterized protein	92.9782	A0A6P3E2F7;W5Q0N8	JEQ12_013634;ADAM17	Uncharacterized protein;ADAM metallopeptidase domain 17	3.06771e-35	53.0692	0.922557	1.13963	1.34269	1.17521	1.18057	0.969004	1.07532	1.41787	1.43312	1.38411	1.34293	1.05656	0.919628	1.128	1.39221	0.855583	1.18237	1.31451	0.953356	1.12731	1.45083	1.10292	1.21363	1.31496	Uncharacterized protein	101116815	JEQ12_013634	GO:0006508,GO:0050896,GO:0046872,GO:0004222,GO:0017124	proteolysis|response to stimulus|metal ion binding|metalloendopeptidase activity|SH3 domain binding	oas04330,oas05171,oas05010	Notch signaling pathway|Coronavirus disease - COVID-19|Alzheimer disease	K06059					PF16698,PF00200,PF01562,PF13688	ADAM17_MPD|Disintegrin|Pep_M12B_propep|Reprolysin_5	Membrane-proximal domain, switch, for ADAM17|Disintegrin|Reprolysin family propeptide|Metallo-peptidase family M12	IPR034025,IPR032029,IPR001762,IPR036436,IPR024079,IPR001590,IPR002870	Domain|Domain|Domain|Homologous_superfamily|Homologous_superfamily|Domain|Domain
A0A6P3E2G5	JEQ12_014040	Uncharacterized protein	60.4151	A0A6P3E2G5;W5PH35	JEQ12_014040;LOC101119706	Uncharacterized protein;Cytochrome P450 1B1	6.49991e-24	49.3277	0.265184	0.00341114	1.03636	0.371161	1.11943	0.0761335	0.525025	0.977589	0.398813	0.682373	0.768433	0.506474	0.486333	0.469298	0.738855	0.579403	0.82664	0.974537	1.08991	0.696652	0.598427	0.896365	0.662931	0.68155	Uncharacterized protein	101119706	JEQ12_014040	GO:0016020,GO:0020037,GO:0005506,GO:0004497,GO:0016705	membrane|heme binding|iron ion binding|monooxygenase activity|oxidoreductase activity, acting on paired donors, with incorporation or reduction of molecular oxygen	oas00140,oas00380,oas00980,oas04913,oas05206,oas05204,oas05207,oas05208	Steroid hormone biosynthesis|Tryptophan metabolism|Metabolism of xenobiotics by cytochrome P450|Ovarian steroidogenesis|MicroRNAs in cancer|Chemical carcinogenesis - DNA adducts|Chemical carcinogenesis - receptor activation|Chemical carcinogenesis - reactive oxygen species	K07410					PF00067	p450	Cytochrome P450	IPR001128,IPR017972,IPR002401,IPR036396	Family|Conserved_site|Family|Homologous_superfamily
A0A6P3E2H7	JEQ12_013745	Uncharacterized protein	58.6068	A0A6P3E2H7;W5QDE0	JEQ12_013745;PPM1G	Uncharacterized protein;Protein phosphatase, Mg2+/Mn2+ dependent 1G	4.52508e-23	49.0303	0.246777	0.440226	0.281317	0.296473	0.0089721	0.56428	0.14154	0.0392274	-0.0253189	0.307753	0.0596888	0.415793	0.241182	0.382364	0.15797	0.209397	0.0465171	0.0483431	0.721755	-0.113483	0.046632	0.327793	0.30152	0.341114	Uncharacterized protein	101118001	JEQ12_013745	GO:0006470,GO:0046872,GO:0004722	protein dephosphorylation|metal ion binding|protein serine/threonine phosphatase activity								PF00481	PP2C	Protein phosphatase 2C	IPR015655,IPR000222,IPR036457,IPR001932	Family|Binding_site|Homologous_superfamily|Domain
A0A6P3E2I3	JEQ12_013767	Protein LBH	12.0905	A0A6P3E2I3;W5QEE2	JEQ12_013767;LBH	Protein LBH	8.65823e-22	48.569	0.94145	0.490272	1.13214	0.950174	0.622257	0.84182	0.930824	1.12965	1.11514	1.12317	1.05396	0.908921	1.01227	0.556532	0.951461	0.547399	0.875682	0.938616	0.504653	0.874388	0.959973	0.960647	1.25147	0.878026	Protein LBH	101103634	JEQ12_013767	GO:0006355,GO:0005737,GO:0005634	regulation of DNA-templated transcription|cytoplasm|nucleus								PF15317	Lbh	Cardiac transcription factor regulator, Developmental protein	IPR013294,IPR038990,IPR042945	Family|Domain|Family
A0A6P3E2I7	JEQ12_013774	RRM domain-containing protein	42.9862	A0A6P3E2I7;W5QEM1	JEQ12_013774;TIA1	RRM domain-containing protein;TIA1 cytotoxic granule associated RNA binding protein	5.49502e-35	52.9907	0.467939	-0.0394535	0.195523	0.26904	0.253538	0.263113	0.314551	0.0824318	0.11728	0.465317	0.0459618	0.0547178	0.175866	0.078309	-0.090811	0.429145	0.316387	0.0371055	0.450756	0.229149	0.143392	0.255095	0.0547213	0.295643	RRM domain-containing protein	101105642	JEQ12_013774	GO:0003723	RNA binding								PF00076	RRM_1	RNA recognition motif. (a.k.a. RRM, RBD, or RNP domain)	IPR012677,IPR035979,IPR000504,IPR003954,IPR034827,IPR034830,IPR034496	Homologous_superfamily|Homologous_superfamily|Domain|Domain|Domain|Domain|Domain
A0A6P3E2J1	JEQ12_013790	CB1 cannabinoid receptor-interacting protein 1	18.6644	A0A6P3E2J1;W5QF76	JEQ12_013790;CNRIP1	CB1 cannabinoid receptor-interacting protein 1	1.2769e-17	46.9666	-1.40739	-5.33573	0.00592987	-0.821359	-1.12015	-0.118125	0.0556028	-0.182821	-1.28071	-1.07964	-0.582882	-1.02347	-1.54836	-1.38218	-1.25284	-1.33254	-0.0130678	-0.512271	-0.75583	-0.224867	-1.15272	-0.586731	-1.17689	-0.703165	CB1 cannabinoid receptor-interacting protein 1	101110489	JEQ12_013790										PF15043	CNRIP1	CB1 cannabinoid receptor-interacting protein 1	IPR029204	Family
A0A6P3E2K1	JEQ12_013862	S-adenosylmethionine synthase	43.6907	A0A6P3E2K1;W5QH42	JEQ12_013862;MAT2A	S-adenosylmethionine synthase	1.5722e-23	49.1929	3.90733	3.86611	3.87117	3.85856	4.00335	3.7032	3.73309	3.88042	3.78335	4.1187	3.63315	3.78115	3.9652	4.00387	3.86191	3.76276	3.79568	4.12619	3.88359	3.97132	3.9365	3.9211	3.87458	3.84542	S-adenosylmethionine synthase	101102380	JEQ12_013862	GO:0006730,GO:0006556,GO:0005524,GO:0046872,GO:0004478	one-carbon metabolic process|S-adenosylmethionine biosynthetic process|ATP binding|metal ion binding|methionine adenosyltransferase activity	oas00270	Cysteine and methionine metabolism	K00789					PF02773,PF02772,PF00438	S-AdoMet_synt_C|S-AdoMet_synt_M|S-AdoMet_synt_N	S-adenosylmethionine synthetase, C-terminal domain|S-adenosylmethionine synthetase, central domain|S-adenosylmethionine synthetase, N-terminal domain	IPR022631,IPR022630,IPR022629,IPR022628,IPR002133,IPR022636	Conserved_site|Domain|Domain|Domain|Family|Homologous_superfamily
A0A6P3E2L7	JEQ12_013933	Peroxisomal membrane protein PEX13	44.3758	A0A6P3E2L7;W5NT51	JEQ12_013933;PEX13	Peroxisomal membrane protein PEX13	1.37821e-05	40.9107	-2.0903	-2.86778	-2.05858	-2.61412	-2.17195	-2.30442	-2.45331	-2.28926	-2.51803	-2.72009	-2.54524	-2.4616	-2.48032	-2.3322	-1.89897	-2.32011	-3.28758	-2.68778	-2.4834	-2.68326	-2.03394	-2.0928	-2.01427	-2.20489	Peroxisomal membrane protein PEX13	101118094	JEQ12_013933	GO:0016560,GO:0016020,GO:0005777	protein import into peroxisome matrix, docking|membrane|peroxisome	oas04146	Peroxisome	K13344					PF04088,PF14604	Peroxin-13_N|SH3_9	Peroxin 13, N-terminal region|Variant SH3 domain	IPR007223,IPR035463,IPR036028,IPR001452	Domain|Family|Homologous_superfamily|Domain
A0A6P3E2M6	MTIF2	Mitochondrial translational initiation factor 2	81.6913	A0A6P3E2M6;A0A836D3E6	MTIF2;JEQ12_013950	Mitochondrial translational initiation factor 2;Tr-type G domain-containing protein	1.47754e-17	46.9406	0.295981	0.230666	-0.0725201	-0.47766	0.112317	-0.0845382	0.122378	-0.249241	0.205232	0.286229	0.172886	-0.0475147	-0.144316	-0.301184	0.0315196	0.214719	-0.00814523	-0.00429091	0.0108738	0.122885	0.116461	-0.00438255	-0.00574252	-0.0928101	Mitochondrial translational initiation factor 2	101122509	MTIF2	GO:0005525,GO:0003924,GO:0003743	GTP binding|GTPase activity|translation initiation factor activity				KOG1145	J	translation initiation factor activity	Translation, ribosomal structure and biogenesis	PF00009,PF11987	GTP_EFTU|IF-2	Elongation factor Tu GTP binding domain|Translation-initiation factor 2	IPR044145,IPR027417,IPR005225,IPR000795,IPR000178,IPR015760,IPR023115,IPR036925,IPR009000	Domain|Homologous_superfamily|Domain|Domain|Family|Family|Domain|Homologous_superfamily|Homologous_superfamily
A0A6P3E2N2	JEQ12_014242	Oxysterol-binding protein	96.96	A0A6P3E2N2	JEQ12_014242	Oxysterol-binding protein	3.61226e-38	53.9615	-0.112436	-0.24746	-0.0798017	-0.0175621	0.0915119	0.12547	0.0150178	-0.00715799	0.180582	0.0432971	0.0715562	-0.0669892	0.0672645	0.0754434	0.166503	-0.0400555	0.05815	0.246551	-0.210397	0.309224	0.176234	0.0784289	-0.0855631	0.112695	Oxysterol-binding protein	101122935	JEQ12_014242	GO:0006869,GO:0016020,GO:0008289	lipid transport|membrane|lipid binding								PF01237,PF00169	Oxysterol_BP|PH	Oxysterol-binding protein |PH domain	IPR037239,IPR000648,IPR018494,IPR011993,IPR001849	Homologous_superfamily|Family|Conserved_site|Homologous_superfamily|Domain
A0A6P3E2N3	JEQ12_013999	Protein kinase C epsilon type	83.6748	A0A6P3E2N3;W5P771	JEQ12_013999;PRKCE	Protein kinase C epsilon type	0.000325849	38.0569	-3.6176		-2.97512			-3.69252		-3.72631	-2.64392	-2.42614	-3.12903	-3.74754	-3.75178	-3.16262	-2.71239	-2.76088	-2.42464	-2.62845	-3.54565	-3.47488	-2.28401	-2.27501	-3.15269	-2.48222	Protein kinase C epsilon type	101110314	JEQ12_013999	GO:0007155,GO:0007049,GO:0051301,GO:0006468,GO:0005856,GO:0005634,GO:0048471,GO:0005886,GO:0005524,GO:0004698,GO:0004699	cell adhesion|cell cycle|cell division|protein phosphorylation|cytoskeleton|nucleus|perinuclear region of cytoplasm|plasma membrane|ATP binding|calcium-dependent protein kinase C activity|calcium-independent protein kinase C activity	oas04371,oas04071,oas04022,oas04530,oas04666,oas04925,oas04270,oas04750,oas05206,oas04930,oas04931,oas04933	Apelin signaling pathway|Sphingolipid signaling pathway|cGMP-PKG signaling pathway|Tight junction|Fc gamma R-mediated phagocytosis|Aldosterone synthesis and secretion|Vascular smooth muscle contraction|Inflammatory mediator regulation of TRP channels|MicroRNAs in cancer|Type II diabetes mellitus|Insulin resistance|AGE-RAGE signaling pathway in diabetic complications	K18050					PF00130,PF00168,PF00069,PF00433	C1_1|C2|Pkinase|Pkinase_C	Phorbol esters/diacylglycerol binding domain (C1 domain)|C2 domain|Protein kinase domain|Protein kinase C terminal domain	IPR000961,IPR046349,IPR000008,IPR035892,IPR020454,IPR011009,IPR034669,IPR002219,IPR027274,IPR017892,IPR014376,IPR000719,IPR017441,IPR008271	Domain|Homologous_superfamily|Domain|Homologous_superfamily|Domain|Homologous_superfamily|Domain|Domain|Family|Domain|Family|Domain|Binding_site|Active_site
A0A6P3E2P2	JEQ12_014036	Aldose 1-epimerase	37.6123	A0A6P3E2P2;W5PGC5	JEQ12_014036;GALM	Aldose 1-epimerase	9.72415e-32	51.959	3.04642	3.33191	3.13323	3.01544	2.86154	3.17651	3.23134	2.8956	3.28667	2.74966	2.96149	3.02415	2.97504	3.204	3.03927	3.13337	2.85387	3.30724	3.16355	2.93724	3.30048	3.04967	3.05133	3.10356	Aldose 1-epimerase	101119196	JEQ12_014036	GO:0006012,GO:0004034,GO:0030246	galactose metabolic process|aldose 1-epimerase activity|carbohydrate binding	oas00010,oas00052	Glycolysis / Gluconeogenesis|Galactose metabolism	K01785					PF01263	Aldose_epim	Aldose 1-epimerase	IPR018052,IPR015443,IPR008183,IPR011013,IPR014718	Conserved_site|Family|Family|Homologous_superfamily|Homologous_superfamily
A0A6P3E2R0	JEQ12_014092	Sidoreflexin	37.1223	A0A6P3E2R0;W5PPW8	JEQ12_014092;SFXN5	Sidoreflexin	2.22678e-22	48.7824	1.16774	0.327842	1.02828	0.793329	1.54755	1.44085	1.12248	1.34097	0.94758	1.17029	1.60427	1.38738	1.28446	1.75	1.03383	1.33703	1.19712	0.944719	0.859317	0.851449	1.25845	1.2412	1.11767	1.36402	Sidoreflexin	101111700	JEQ12_014092	GO:0006865,GO:0031966,GO:0015075	amino acid transport|mitochondrial membrane|monoatomic ion transmembrane transporter activity								PF03820	SFXNs	Sideroflexins	IPR004686	Family
A0A6P3E2R6	JEQ12_014338	Uncharacterized protein	42.8328	A0A6P3E2R6	JEQ12_014338	Uncharacterized protein	5.47901e-28	50.7216	1.32892	1.64589	1.50951	1.78383	1.44298	1.76855	1.67663	1.18623	1.63077	1.4802	1.68591	1.39672	1.48659	1.52042	1.42783	1.44647	1.22378	1.75792	1.19244	1.16118	1.62362	1.81159	1.39477	1.6515	Uncharacterized protein	101105232	JEQ12_014338										PF03690	UPF0160	Uncharacterised protein family (UPF0160)	IPR003226	Family
A0A6P3E2S0	JEQ12_014348	Uncharacterized protein	68.8289	A0A6P3E2S0;W5Q5L0	JEQ12_014348;EIF4B	Uncharacterized protein;Eukaryotic translation initiation factor 4B	1.00739e-15	46.1636	0.608633	0.179335	0.155663	0.142564	-0.0205941	0.582689	0.106136	-0.0899135	0.341231	0.200038	0.134541	0.172684	0.310448	0.152723	0.549943	0.280315	-0.35022	0.151081	0.77641	0.0572897	-0.0549745	0.120622	0.550076	0.227851	Uncharacterized protein	101107685	JEQ12_014348	GO:0003723	RNA binding	oas04151,oas04150,oas05205	PI3K-Akt signaling pathway|mTOR signaling pathway|Proteoglycans in cancer	K03258					PF00076	RRM_1	RNA recognition motif. (a.k.a. RRM, RBD, or RNP domain)	IPR033107,IPR012677,IPR035979,IPR000504	Domain|Homologous_superfamily|Homologous_superfamily|Domain
A0A6P3E2T2	JEQ12_014397	Rac GTPase-activating protein 1	70.8563	A0A6P3E2T2;A0A6P3TEK1	JEQ12_014397;RACGAP1	Rac GTPase-activating protein 1;Rac GTPase activating protein 1	0.00104218	35.7652	-4.22499		-3.28924				-3.28222	-4.54729	-4.55695	-3.06818	-3.41836	-4.56852	-4.35449	-3.34275	-4.18523	-3.29069	-2.88247	-2.99805	-4.15304	-4.08227	-3.29964	-4.12499	-4.3878	-3.54768	Rac GTPase-activating protein 1	101120998	JEQ12_014397	GO:0007165	signal transduction								PF00130,PF00620	C1_1|RhoGAP	Phorbol esters/diacylglycerol binding domain (C1 domain)|RhoGAP domain	IPR046349,IPR002219,IPR008936,IPR000198	Homologous_superfamily|Domain|Homologous_superfamily|Domain
A0A6P3E2T7	JEQ12_014139	Uncharacterized protein	45.2379	A0A6P3E2T7;W5PU00	JEQ12_014139;MRPS9	Uncharacterized protein;Mitochondrial ribosomal protein S9	2.67631e-26	50.1513	0.00871116	0.0573105	0.249033	0.344289	0.322044	0.483859	0.0305195	-0.0488956	0.353483	0.242088	0.0763562	0.208082	0.00134793	-0.0226119	-0.0226303	0.19443	0.0924049	0.322766	0.284373	0.212628	0.317973	0.309645	0.369986	0.218283	Uncharacterized protein	101102050	JEQ12_014139	GO:0006412,GO:1990904,GO:0005840,GO:0003735	translation|ribonucleoprotein complex|ribosome|structural constituent of ribosome	oas03010	Ribosome	K02996					PF00380	Ribosomal_S9	Ribosomal protein S9/S16	IPR020568,IPR014721,IPR000754,IPR020574	Homologous_superfamily|Homologous_superfamily|Family|Conserved_site
A0A6P3E2U3	MRPL30	39S ribosomal protein L30, mitochondrial	18.4697	A0A6P3E2U3;A0A835ZYH7	MRPL30;JEQ12_002594	39S ribosomal protein L30, mitochondrial;39S ribosomal protein L30, mitochondrial	5.16245e-11	44.0795	-0.76661	-0.489502	0.20175	-0.0641257	0.0702008	-0.0896206	0.050666	-0.11783	-0.186258	0.176085	-0.208679	-0.261286	-0.330559	-0.154105	-0.139031	0.0607037	-0.144414	0.124079	-0.501161	-0.238122	-0.156386	-0.32894	-0.397548	0.0266903	39S ribosomal protein L30, mitochondrial	101107082	MRPL30	GO:0006412,GO:0015934,GO:0003735	translation|large ribosomal subunit|structural constituent of ribosome	oas03010	Ribosome	K02907	KOG4799	J	structural constituent of ribosome	Translation, ribosomal structure and biogenesis	PF00327	Ribosomal_L30	Ribosomal protein L30p/L7e	IPR036919,IPR005996,IPR016082	Homologous_superfamily|Family|Domain
A0A6P3E2V8	JEQ12_014222	Putative zinc-finger domain-containing protein	226.122	A0A6P3E2V8;W5PYX9	JEQ12_014222;ZFC3H1	Putative zinc-finger domain-containing protein;Zinc finger C3H1-type containing	0.000985951	35.9181	-1.91544	-3.02762	-2.70785	-1.1559	-1.66938	-2.36493	-1.29777	-2.70062	-1.83056	-2.13811	-2.77795	-0.668961	-2.14048	-1.87931	-2.9427	-2.57211	-1.29133	-2.78017	-2.53039	-2.79242	-3.23277	-2.1686	-2.77132	-0.254976	Putative zinc-finger domain-containing protein	101119547	JEQ12_014222	GO:0006396	RNA processing								PF10650	zf-C3H1	Putative zinc-finger domain	IPR003107,IPR019607,IPR039278,IPR011990,IPR019734	Repeat|Domain|Family|Homologous_superfamily|Repeat
A0A6P3E2X9	JEQ12_014527	Uncharacterized protein	50.2946	A0A6P3E2X9;W5P0U8	JEQ12_014527;C3H12orf66	Uncharacterized protein;Chromosome 3 C12orf66 homolog	0.000603047	37.0333								-2.09196	0.111169	-2.44224	-2.7844	-2.11319	-2.11743		-2.26393						-2.18846	-2.80387			Uncharacterized protein	101111620	JEQ12_014527										PF09404	C12orf66_like	KICSTOR complex C12orf66 like	IPR038060,IPR018544	Homologous_superfamily|Family
A0A6P3E2Z0	JEQ12_014545	Uncharacterized protein	91.6897	A0A6P3E2Z0;W5P4L3	JEQ12_014545;AVIL	Uncharacterized protein;Advillin	1.89884e-30	51.537	0.410029	0.187231	-0.129695	-0.0128518	-1.07531	0.159293	-0.227166	0.0300114	0.178072	0.105287	0.37576	0.184545	0.0589683	0.271202	0.328649	-0.329246	0.168855	-0.175351	-0.0329211	0.287206	0.021348	0.594489	-0.181052	0.146956	Uncharacterized protein	101114855	JEQ12_014545	GO:0051693,GO:0007010,GO:0051015	actin filament capping|cytoskeleton organization|actin filament binding								PF00626,PF02209	Gelsolin|VHP	Gelsolin repeat|Villin headpiece domain	IPR029006,IPR007123,IPR036180,IPR007122,IPR003128,IPR036886	Homologous_superfamily|Domain|Homologous_superfamily|Family|Domain|Homologous_superfamily
A0A6P3E2Z8	JEQ12_014561	PIPK domain-containing protein	47.1407	A0A6P3E2Z8	JEQ12_014561	PIPK domain-containing protein	5.8416e-30	51.3769	0.149578	0.331838	0.39949	0.381622	0.385523	0.314781	0.24793	0.240516	0.434574	0.741842	0.567095	0.428883	0.598086	0.439739	0.549759	0.376554	0.452308	0.564785	0.567701	0.188202	0.154776	0.478847	0.366831	0.605606	PIPK domain-containing protein	101119125	JEQ12_014561	GO:0005524,GO:0016307	ATP binding|phosphatidylinositol phosphate kinase activity	oas00562,oas04070,oas04810	Inositol phosphate metabolism|Phosphatidylinositol signaling system|Regulation of actin cytoskeleton	K00920					PF01504	PIP5K	Phosphatidylinositol-4-phosphate 5-Kinase	IPR023610,IPR002498,IPR027484	Family|Domain|Homologous_superfamily
A0A6P3E320	JEQ12_014369	Autophagy-related protein 101	25.0166	A0A6P3E320;W5Q6W7	JEQ12_014369;ATG101	Autophagy-related protein 101	8.48926e-17	46.6255	-0.902737	-1.3757	-0.807992	-1.31857	-0.729297	-1.10729	-0.509697	-0.942118	-0.694401	-0.838662	-1.2125	-1.3423	-1.08485	-1.07364	-0.773254	-0.824422	-0.825962	-0.721846	-1.10401	-0.983735	-0.823399	-0.592796	-0.887559	-0.742157	Autophagy-related protein 101	101112968	JEQ12_014369	GO:0006914	autophagy	oas04140,oas04136,oas04211,oas05010,oas05014,oas05016,oas05017,oas05022	Autophagy - animal|Autophagy - other|Longevity regulating pathway|Alzheimer disease|Amyotrophic lateral sclerosis|Huntington disease|Spinocerebellar ataxia|Pathways of neurodegeneration - multiple diseases	K19730					PF07855	ATG101	Autophagy-related protein 101	IPR012445	Family
A0A6P3E326	JEQ12_014602	Uncharacterized protein	20.6382	A0A6P3E326;W5PI22	JEQ12_014602;CNPY2	Uncharacterized protein;Canopy FGF signaling regulator 2	1.51758e-33	52.5368	2.81605	3.17632	2.88609	3.22858	2.92424	3.1216	2.76553	3.08682	3.04338	3.40053	3.05766	2.8696	3.2447	2.94849	3.20704	3.03293	2.88433	3.18123	3.24482	2.78184	2.87383	3.17559	3.20004	3.23114	Uncharacterized protein	101108903	JEQ12_014602										PF11938	DUF3456	TLR4 regulator and MIR-interacting MSAP	IPR042415,IPR021852,IPR008139	Family|Domain|Domain
A0A6P3E340	JEQ12_014634	Olfactory receptor	35.058	A0A6P3E340;W5Q993;W5Q9B9	JEQ12_014634;LOC101115952;LOC101105650	Olfactory receptor	0.000953685	36.0058	1.16659	1.83992	0.900854	0.273222	0.573559	0.433976	0.502351	1.31226	1.26597	0.89884	0.552491	0.446454	-0.452406	0.365233	1.14246	0.481211	1.32884	1.25496	0.286426	1.20604	0.396868	-0.485699	0.0834077	0.612824	Olfactory receptor	101115952	JEQ12_014634	GO:0005886,GO:0004930,GO:0004984	plasma membrane|G protein-coupled receptor activity|olfactory receptor activity	oas04740	Olfactory transduction	K04257					PF13853	7tm_4	Olfactory receptor	IPR000276,IPR017452,IPR000725	Family|Domain|Family
A0A6P3E355	JEQ12_014460	Uncharacterized protein	197.551	A0A6P3E355;W5QE59	JEQ12_014460;ARID2	Uncharacterized protein;AT-rich interaction domain 2	1.02733e-20	48.1741	-0.479904	-0.851348	-0.286436	-0.621658	-0.2258	-0.625736	-0.368935	-0.623411	-0.395959	-0.490261	-0.339479	-0.550826	-0.621967	-0.512952	-0.374934	-0.587397	-0.489637	-0.348483	-0.458692	-0.484616	-0.442507	-0.449101	-0.40851	-0.451712	Uncharacterized protein	101112969	JEQ12_014460	GO:0006355,GO:0003677	regulation of DNA-templated transcription|DNA binding	oas05225	Hepatocellular carcinoma	K11765					PF01388,PF02257	ARID|RFX_DNA_binding	ARID/BRIGHT DNA binding domain|RFX DNA-binding domain	IPR001606,IPR036431,IPR016024,IPR003150,IPR036388,IPR036390,IPR013087	Domain|Homologous_superfamily|Homologous_superfamily|Domain|Homologous_superfamily|Homologous_superfamily|Domain
A0A6P3E381	JEQ12_014755	Uncharacterized protein	58.0411	A0A6P3E381;W5Q7F3	JEQ12_014755;TCP11L2	Uncharacterized protein;T-complex 11 like 2	1.52844e-06	41.9038	-1.36869	-0.923645	-1.23869	-1.91849	-1.13084	-1.56734	-1.05161	-1.25513	-1.76948	-1.40649	-1.4363	-1.07491	-1.48253	-1.22494	-0.975372	-1.13485	-1.46671	-1.41883	-0.991414	-0.698176	-1.0684	-1.25933	-1.37502	-1.32239	Uncharacterized protein	101115200	JEQ12_014755										PF05794	Tcp11	T-complex protein 11	IPR008862	Family
A0A6P3E388	RTCB	RNA-splicing ligase RtcB homolog	55.2263	A0A6P3E388;W5Q9D9	RTCB	RNA-splicing ligase RtcB homolog	6.5475e-33	52.3355	2.87247	3.04935	2.98253	2.93493	3.11147	3.10234	3.18134	3.16904	3.07883	3.18141	3.26399	3.00759	3.08921	3.09296	3.0914	3.09039	3.11612	3.07519	3.05504	3.06573	3.10702	3.09775	3.07521	3.18829	RNA-splicing ligase RtcB homolog	101118007	RTCB	GO:0006388,GO:0005737,GO:0072669,GO:0005525,GO:0046872,GO:0003972	tRNA splicing, via endonucleolytic cleavage and ligation|cytoplasm|tRNA-splicing ligase complex|GTP binding|metal ion binding|RNA ligase (ATP) activity								PF01139	RtcB	tRNA-splicing ligase RtcB	IPR001233,IPR036025,IPR027513	Family|Homologous_superfamily|Family
A0A6P3E392	SLC16A7	Solute carrier family 16 member 7	52.4375	A0A6P3E392;A0A6P3TQ29	SLC16A7;JEQ12_014540	Solute carrier family 16 member 7;Major facilitator superfamily (MFS) profile domain-containing protein	9.25898e-05	39.4163	-1.74527	0.721018	-0.339811	0.747155	-1.54032	-0.464068	-1.53438	-1.37384	-2.05466	-2.20881	-2.81161	-1.01037	-2.26629	-0.00177295	-0.924138	-1.14124	-0.885574	-0.658438	-0.358302	-0.236427	-0.783721	-0.83749	-1.94854	-0.44295	Solute carrier family 16 member 7	101113834	SLC16A7	GO:0016020,GO:0008028	membrane|monocarboxylic acid transmembrane transporter activity				KOG2504	IQ	monocarboxylate transporter	Lipid transport and metabolism|Secondary metabolites biosynthesis, transport and catabolism	PF07690	MFS_1	Major Facilitator Superfamily	IPR004743,IPR011701,IPR020846,IPR036259	Family|Family|Domain|Homologous_superfamily
A0A6P3E3B2	JEQ12_014833	Uncharacterized protein	119.844	A0A6P3E3B2	JEQ12_014833	Uncharacterized protein	1.36999e-38	54.0852	-1.60738	-1.98168	-0.832113	-1.22651	-0.909187	-1.48702	-1.05894	-1.6105	-1.69599	-0.870577	-1.30093	-2.01007	-0.912351	-1.36351	-1.24783	-0.725356	-1.156	-1.3441	-1.59429	-1.43741	-1.3149	-1.22402	-0.770107	-1.14912	Uncharacterized protein	101108038	JEQ12_014833	GO:0006886,GO:0005737,GO:0031267	intracellular protein transport|cytoplasm|small GTPase binding	oas03013	Nucleocytoplasmic transport	K18755					PF08506,PF03810	Cse1|IBN_N	Cse1|Importin-beta N-terminal domain	IPR011989,IPR016024,IPR001494,IPR013713	Homologous_superfamily|Homologous_superfamily|Domain|Domain
A0A6P3E3B4	JEQ12_014591	Bromodomain adjacent to zinc finger domain protein 2A	209.46	A0A6P3E3B4;W5PF08	JEQ12_014591;BAZ2A	Bromodomain adjacent to zinc finger domain protein 2A;Bromodomain adjacent to zinc finger domain 2A	1.08733e-15	46.1491	-0.374314	-0.282464	-0.428463	-0.289127	-0.115868	-0.373375	-0.226071	-0.542744	-0.219504	-0.228642	-0.341116	-0.426207	-0.306847	-0.483296	-0.367117	-0.44019	-0.268699	-0.105529	-0.541068	-0.147872	-0.271847	-0.178564	-0.249406	-0.513477	Bromodomain adjacent to zinc finger domain protein 2A	101106579	JEQ12_014591	GO:0005634,GO:0003677,GO:0046872	nucleus|DNA binding|metal ion binding								PF00439,PF02791,PF01429,PF00628,PF15612,PF15613	Bromodomain|DDT|MBD|PHD|WHIM1|WSD	Bromodomain|DDT domain|Methyl-CpG binding domain|PHD-finger|WSTF, HB1, Itc1p, MBD9 motif 1|Williams-Beuren syndrome DDT (WSD), D-TOX E motif	IPR017956,IPR037374,IPR001487,IPR036427,IPR018359,IPR018501,IPR016177,IPR001739,IPR028940,IPR028942,IPR028941,IPR011011,IPR001965,IPR019787,IPR013083	Conserved_site|Domain|Domain|Homologous_superfamily|Conserved_site|Domain|Homologous_superfamily|Domain|Domain|Domain|Domain|Homologous_superfamily|Domain|Domain|Homologous_superfamily
A0A6P3E3C3	JEQ12_014607	E3 ubiquitin-protein ligase NRDP1	35.9191	A0A6P3E3C3;A0A6P3TK16	JEQ12_014607;RNF41	E3 ubiquitin-protein ligase NRDP1	0.000754571	36.5686	-2.95183	-2.52535	-1.97594	-2.56457	-2.37113	-3.04322	-2.24177	-1.99657	-2.25774	-2.18912	-2.26094	-1.90637	-3.23439	-2.30027	-1.89898	-2.26269	-4.14579	-2.22461	-2.44724	-1.91598	-2.8151	-2.35359	-1.78561	-2.37082	E3 ubiquitin-protein ligase NRDP1	101109689	JEQ12_014607	GO:0016567,GO:0046872,GO:0061630	protein ubiquitination|metal ion binding|ubiquitin protein ligase activity	oas04144	Endocytosis	K11981					PF08941,PF13923	USP8_interact|zf-C3HC4_2	USP8 interacting|Zinc finger, C3HC4 type (RING finger)	IPR015036,IPR037255,IPR001841,IPR013083,IPR017907	Domain|Homologous_superfamily|Domain|Homologous_superfamily|Conserved_site
A0A6P3E3E9	JEQ12_014689	Probable imidazolonepropionase	46.5156	A0A6P3E3E9;W5PR50	JEQ12_014689;AMDHD1	Probable imidazolonepropionase	8.88139e-05	39.453	-0.672049	-0.692461	-0.653675	-1.11551	-1.53122	-0.253602	-1.58056	-1.41669	-1.42636	-0.676773	-1.05519	-0.529722	-1.11991	-0.206469	-0.223113	-0.561643	-0.538501	-1.28001	-0.464821	-1.03956	-0.690166	-0.493591	-0.536748	-0.567883	Probable imidazolonepropionase	101121504	JEQ12_014689	GO:0019556,GO:0019557,GO:0005737,GO:0050480	histidine catabolic process to glutamate and formamide|histidine catabolic process to glutamate and formate|cytoplasm|imidazolonepropionase activity	oas00340	Histidine metabolism	K01468					PF01979	Amidohydro_1	Amidohydrolase family	IPR006680,IPR005920,IPR011059,IPR032466	Domain|Family|Homologous_superfamily|Homologous_superfamily
A0A6P3E3F1	JEQ12_014935	BLOC-1-related complex subunit 5	22.2003	A0A6P3E3F1;W5QI72	JEQ12_014935;BORCS5	BLOC-1-related complex subunit 5	1.53164e-20	48.1096	0.84601	0.431884	0.5979	0.634055	0.727297	0.870058	0.714241	0.788754	0.763982	0.631531	0.74029	0.950184	0.866311	0.859587	0.73846	0.703083	0.494468	0.610194	1.01241	0.660559	0.950771	0.805168	0.546044	0.795137	BLOC-1-related complex subunit 5	101112472	JEQ12_014935	GO:0032418,GO:0005765	lysosome localization|lysosomal membrane								PF10158	LOH1CR12	Tumour suppressor protein	IPR018780	Family
A0A6P3E3I4	JEQ12_014764	Uncharacterized protein	55.8519	A0A6P3E3I4;W5Q969	JEQ12_014764;PWP1	Uncharacterized protein;PWP1 homolog, endonuclein	2.36939e-23	49.1299	-1.2637	-1.58574	-1.17662	-1.71302	-0.803419	-1.38519	-1.75131	-1.37037	-0.97944	-0.803766	-0.940348	-1.10622	-2.09836	-1.13936	-1.05175	-1.27849	-1.66181	-0.961887	-1.10272	-1.32358	-1.22306	-1.00814	-1.28031	-0.964236	Uncharacterized protein	101117490	JEQ12_014764	GO:0006364	rRNA processing								PF00400	WD40	WD domain, G-beta repeat	IPR020472,IPR044285,IPR015943,IPR001680,IPR019775,IPR036322	Repeat|Family|Homologous_superfamily|Repeat|Conserved_site|Homologous_superfamily
A0A6P3E3I5	JEQ12_015054	NAD-dependent epimerase/dehydratase domain-containing protein	42.9166	A0A6P3E3I5;A0A8V6VJX1	JEQ12_015054;NDUFA9	NAD-dependent epimerase/dehydratase domain-containing protein;NADH:ubiquinone oxidoreductase subunit A9	4.51673e-42	55.0982	2.45918	2.63173	2.55495	2.78223	2.56622	2.70171	2.72522	2.52994	2.74926	2.68065	2.38027	2.60214	2.83786	2.65948	2.57375	2.92192	2.67333	2.63438	2.72178	2.70072	2.67397	2.63432	2.8342	2.56643	NAD-dependent epimerase/dehydratase domain-containing protein	101115781	JEQ12_015054			oas00190,oas04723,oas04714,oas05208,oas05010,oas05012,oas05014,oas05016,oas05020,oas05022,oas05415,oas04932	Oxidative phosphorylation|Retrograde endocannabinoid signaling|Thermogenesis|Chemical carcinogenesis - reactive oxygen species|Alzheimer disease|Parkinson disease|Amyotrophic lateral sclerosis|Huntington disease|Prion disease|Pathways of neurodegeneration - multiple diseases|Diabetic cardiomyopathy|Non-alcoholic fatty liver disease	K03953					PF01370	Epimerase	NAD dependent epimerase/dehydratase family	IPR001509,IPR036291	Domain|Homologous_superfamily
A0A6P3E3J1	JEQ12_014774	Uncharacterized protein	22.4967	A0A6P3E3J1;W5QA54	JEQ12_014774;LOC101119629	Uncharacterized protein;Protein HP-25 homolog 2	2.35936e-13	45.0767	3.62681	3.78036	4.26467	3.57239	2.64515	3.08294	2.90592	3.82916	3.26613	3.42212	3.609	3.59724	2.49626	3.01879	3.69466	3.44423	3.12183	2.29233	2.81401	3.19755	3.23018	2.69681	2.58422	3.7205	Uncharacterized protein	101119629	JEQ12_014774										PF00386	C1q	C1q domain	IPR001073,IPR008983	Domain|Homologous_superfamily
A0A6P3E3J6	JEQ12_014802	Parvalbumin	12.1399	A0A6P3E3J6;W5QCI5	JEQ12_014802;	Parvalbumin	4.60063e-06	41.4819		-1.39023	-4.91504	-0.26464	-2.21654	-2.15785	-2.21831				-1.20889														Parvalbumin	101122682	JEQ12_014802	GO:0005509	calcium ion binding								PF13499	EF-hand_7	EF-hand domain pair	IPR011992,IPR018247,IPR002048,IPR008080	Homologous_superfamily|Binding_site|Domain|Family
A0A6P3E3L2	JEQ12_015159	Active regulator of SIRT1	15.3487	A0A6P3E3L2;W5Q5N4	JEQ12_015159;RPS19BP1	Active regulator of SIRT1	1.20803e-29	51.2727	-1.59435	-0.741798	-0.8636	-0.897678	-0.286075	-0.908165	-1.32483	-0.594579	-0.617996	-1.71531	-1.08098	-1.85246	-1.22215	-1.15369	-1.61247	-0.657915	-1.36697	-2.60315	-1.08734	-1.82401	-1.16103	-1.00098	-0.896716	-1.71783	Active regulator of SIRT1	101107345	JEQ12_015159	GO:0005730	nucleolus								PF15684	AROS	Active regulator of SIRT1, or 40S ribosomal protein S19-binding 1	IPR023262	Family
A0A6P3E3L9	JEQ12_015177	Uncharacterized protein	12.4054	A0A6P3E3L9;W5QA39	JEQ12_015177;PHF5A	Uncharacterized protein;PHD finger protein 5A	3.71257e-25	49.7599	1.3928	1.5471	1.98209	1.6958	1.56763	1.85658	1.63677	1.61	1.61322	1.64465	1.55848	1.64501	1.77533	1.81071	1.77811	1.75375	1.39358	1.7115	1.57328	1.1842	1.64919	1.76189	1.55544	1.79005	Uncharacterized protein	101110927	JEQ12_015177	GO:0000398	mRNA splicing, via spliceosome	oas03040	Spliceosome	K12834					PF03660	PHF5	PHF5-like protein	IPR005345	Family
A0A6P3E3M5	JEQ12_014840	Fatty acyl-CoA reductase	58.8965	A0A6P3E3M5;A0A6P3TLZ1	JEQ12_014840;FAR2	Fatty acyl-CoA reductase	7.53955e-31	51.6694	0.480729	0.434397	1.64033	1.06622	1.49227	0.610417	1.36031	0.849029	0.646887	0.882512	1.31937	1.57464	1.09118	0.951968	1.27496	2.11033	0.862289	0.570584	0.880503	0.186044	0.506089	0.829712	1.91968	1.60315	Fatty acyl-CoA reductase	101109003	JEQ12_014840	GO:1901568,GO:0005778,GO:0080019	fatty acid derivative metabolic process|peroxisomal membrane|alcohol-forming very long-chain fatty acyl-CoA reductase activity	oas04146	Peroxisome	K13356					PF07993,PF03015	NAD_binding_4|Sterile	Male sterility protein|Male sterility protein	IPR026055,IPR033640,IPR013120,IPR036291	Family|Domain|Domain|Homologous_superfamily
A0A6P3E3M9	JEQ12_015203	Uncharacterized protein	46.0552	A0A6P3E3M9;W5QCF1	JEQ12_015203;POLDIP3	Uncharacterized protein;DNA polymerase delta interacting protein 3	1.52986e-28	50.9065	1.36123	1.27224	1.19546	1.43023	1.4038	1.43889	1.25276	1.46017	1.32815	1.489	1.4953	1.15693	1.43277	1.30552	1.33778	1.38391	1.38565	1.405	1.38414	1.24784	1.50178	1.58346	1.48538	1.45799	Uncharacterized protein	101115019	JEQ12_015203	GO:0003723	RNA binding								PF00076	RRM_1	RNA recognition motif. (a.k.a. RRM, RBD, or RNP domain)	IPR012677,IPR034784,IPR035979,IPR000504	Homologous_superfamily|Domain|Homologous_superfamily|Domain
A0A6P3E3P1	JEQ12_014871	Uncharacterized protein	115.782	A0A6P3E3P1;W5QFZ6;W5QFZ7	JEQ12_014871;C2CD5;C2CD5	Uncharacterized protein;C2 calcium dependent domain containing 5;C2 calcium dependent domain containing 5	1.48916e-23	49.2012	-0.228076	-0.406526	0.010465	-0.0539306	-0.11978	-0.03323	0.0223312	-0.173784	0.0601351	0.0858819	0.286052	-0.00359589	-0.0084288	-0.00368231	0.0781721	-0.0965707	-0.0706154	-0.0753438	-0.138291	-0.194168	-0.378342	-0.188342	0.0358144	-0.121167	Uncharacterized protein	101116387	JEQ12_014871	GO:0005544	calcium-dependent phospholipid binding								PF00168	C2	C2 domain	IPR037785,IPR000008,IPR035892,IPR038983	Domain|Domain|Homologous_superfamily|Family
A0A6P3E3P3	JEQ12_013479	Uncharacterized protein	44.3732	A0A6P3E3P3;W5PF91;W5PF94	JEQ12_013479;TOR1A;TOR1A	Uncharacterized protein;Torsin family 1 member A;Torsin	6.75589e-17	46.6673	-0.941089	-0.711961	-0.359754	-0.566223	-1.73036	-0.813612	-0.693462	-0.726024	-1.25837	-0.633373	-0.9082	-0.755288	-0.622894	-0.496178	-1.73985	-0.857358	-0.888394	-0.593306	-1.01363	-1.24576	-0.988345	-0.889598	-1.61803	-1.08566	Uncharacterized protein	101103390	JEQ12_013479	GO:0005524,GO:0016887	ATP binding|ATP hydrolysis activity								PF06309	Torsin	Torsin	IPR027417,IPR010448	Homologous_superfamily|Family
A0A6P3E3S3	JEQ12_000143	28S ribosomal protein S15, mitochondrial	29.5235	A0A6P3E3S3;W5QEM0	JEQ12_000143;MRPS15	28S ribosomal protein S15, mitochondrial;28S ribosomal protein S15, mitochondrial	2.24677e-05	40.5781	-0.442435	-0.725337	-1.13753	-0.253223	-0.17484	-0.193667	-0.182656	-0.184766	-0.646712	0.106069	-0.0623861	-0.518928	-0.44068	-0.0139885	-0.225975	-0.48854	-0.451547	0.116424	-0.438674	-0.896424	0.0690079	-0.385473	-0.634976	-0.0435308	28S ribosomal protein S15, mitochondrial	101113805	JEQ12_000143	GO:0006412,GO:0005737,GO:1990904,GO:0005840,GO:0003735	translation|cytoplasm|ribonucleoprotein complex|ribosome|structural constituent of ribosome	oas03010	Ribosome	K02956					PF00312	Ribosomal_S15	Ribosomal protein S15	IPR000589,IPR005290,IPR009068	Family|Family|Homologous_superfamily
A0A6P3E3S7	JEQ12_014919	Phospholipase B-like	62.6709	A0A6P3E3S7;W5QHX9	JEQ12_014919;PLBD1	Phospholipase B-like	3.41444e-31	51.7819	2.84862	2.93583	2.62485	2.93449	2.67097	2.99136	2.81484	3.64296	2.96982	3.40616	3.06708	2.89618	3.13102	2.8637	2.55125	3.13475	3.16422	2.85058	3.33603	3.06115	2.75743	2.81405	2.7993	2.91829	Phospholipase B-like	101108736	JEQ12_014919	GO:0016042,GO:0004620	lipid catabolic process|phospholipase activity								PF04916	Phospholip_B	Phospholipase B	IPR007000,IPR043040,IPR043041,IPR043042	Family|Homologous_superfamily|Homologous_superfamily|Homologous_superfamily
A0A6P3E3T3	JEQ12_014931	Cyclin-dependent kinase inhibitor domain-containing protein	22.1434	A0A6P3E3T3	JEQ12_014931	Cyclin-dependent kinase inhibitor domain-containing protein	4.90634e-15	45.8572	-0.791099	-0.793208	-0.881765	-0.535927	-0.564452	-0.635091	-0.558276	-0.674867	-0.738473	-0.823358	-0.172579	-0.28719	-0.749802	-0.460928	-0.211602	-0.705216	-0.682101	-0.68344	-0.733703	-0.749936	-0.388259	-0.166335	-0.613549	-0.485098	Cyclin-dependent kinase inhibitor domain-containing protein	100127219	JEQ12_014931	GO:0045736,GO:0005634,GO:0004861	negative regulation of cyclin-dependent protein serine/threonine kinase activity|nucleus|cyclin-dependent protein serine/threonine kinase inhibitor activity	oas04012,oas04066,oas04068,oas04151,oas04110,oas05200,oas05202,oas05206,oas05203,oas05226,oas05220,oas05215,oas05222,oas05162,oas05169,oas05165,oas04933,oas04934,oas01522	ErbB signaling pathway|HIF-1 signaling pathway|FoxO signaling pathway|PI3K-Akt signaling pathway|Cell cycle|Pathways in cancer|Transcriptional misregulation in cancer|MicroRNAs in cancer|Viral carcinogenesis|Gastric cancer|Chronic myeloid leukemia|Prostate cancer|Small cell lung cancer|Measles|Epstein-Barr virus infection|Human papillomavirus infection|AGE-RAGE signaling pathway in diabetic compl…	K06624					PF02234	CDI	Cyclin-dependent kinase inhibitor	IPR003175,IPR044898	Domain|Homologous_superfamily
A0A6P3E3U0	JEQ12_000187	CAAX prenyl protease	54.7248	A0A6P3E3U0;W5QG63	JEQ12_000187;ZMPSTE24	CAAX prenyl protease	1.77182e-23	49.1744	-0.252139	0.108372	0.0449603	0.134685	0.131662	-0.0610918	0.330376	0.148054	0.23296	0.468214	-0.335244	-0.260838	0.272543	0.0733843	0.0357213	-0.291421	0.278469	0.331753	-0.119217	-0.179799	-0.412591	0.0702799	0.114838	0.0838787	CAAX prenyl protease	101122230	JEQ12_000187	GO:0071586,GO:0005789,GO:0046872,GO:0004222	CAAX-box protein processing|endoplasmic reticulum membrane|metal ion binding|metalloendopeptidase activity	oas00900	Terpenoid backbone biosynthesis	K06013					PF01435,PF16491	Peptidase_M48|Peptidase_M48_N	Peptidase family M48|CAAX prenyl protease N-terminal, five membrane helices	IPR027057,IPR001915,IPR032456	Family|Domain|Domain
A0A6P3E3V3	JEQ12_000240	Importin-13	108.117	A0A6P3E3V3;W5NR51	JEQ12_000240;IPO13	Importin-13	1.72674e-39	54.3526	-1.22645	-1.20823	-1.16567	-1.36168	-1.20647	-1.47794	-1.18473	-1.227	-1.32708	-0.813318	-1.21668	-1.06775	-1.28893	-1.17446	-1.11271	-1.16345	-0.891982	-1.07745	-0.92149	-1.08277	-1.03599	-1.10478	-0.917874	-0.991471	Importin-13	101113708	JEQ12_000240	GO:0006886,GO:0006913,GO:0005737,GO:0005634,GO:0031267	intracellular protein transport|nucleocytoplasmic transport|cytoplasm|nucleus|small GTPase binding	oas03013	Nucleocytoplasmic transport	K25202					PF03810,PF18773,PF18786,PF18806,PF08389	IBN_N|Importin_rep|Importin_rep_2|Importin_rep_3|Xpo1	Importin-beta N-terminal domain|Importin 13 repeat|Importin 13 repeat|Importin 13 repeat|Exportin 1-like protein	IPR011989,IPR016024,IPR013598,IPR001494,IPR040709,IPR040944,IPR040520	Homologous_superfamily|Homologous_superfamily|Domain|Domain|Repeat|Repeat|Repeat
A0A6P3E3V6	JEQ12_015318	RBR-type E3 ubiquitin transferase	122.112	A0A6P3E3V6;W5Q985	JEQ12_015318;ANKIB1	RBR-type E3 ubiquitin transferase	3.53721e-06	41.5926	-2.65262	-2.02763	-2.49926	-2.46039	-2.33015	-2.33808	-2.34807	-1.56319	-2.21258	-2.41419	-2.20149	-2.41119	-2.37075	-2.12986	-2.60661	-2.66155	-2.53591	-2.10899	-2.24436	-2.40895	-2.28753	-2.19208	-2.50158	-2.38139	RBR-type E3 ubiquitin transferase	101111273	JEQ12_015318	GO:0016567,GO:0046872,GO:0004842	protein ubiquitination|metal ion binding|ubiquitin-protein transferase activity								PF00023,PF19422,PF01485	Ank|Ariadne|IBR	Ankyrin repeat|Ariadne domain|IBR domain, a half RING-finger domain	IPR002110,IPR036770,IPR045840,IPR031127,IPR002867,IPR044066,IPR003903,IPR001841,IPR013083	Repeat|Homologous_superfamily|Domain|Family|Domain|Domain|Conserved_site|Domain|Homologous_superfamily
A0A6P3E3X1	JEQ12_000286	fatty acid amide hydrolase	62.805	A0A6P3E3X1;W5NWR9	JEQ12_000286;FAAH	fatty acid amide hydrolase	1.69469e-27	50.5568	-0.909198	-0.964881	-1.02538	-0.938622	-1.11338	-0.835562	-0.525289	-0.930018	-0.798163	-0.820342	-1.00124	-0.485833	-0.737222	-0.706881	-1.08176	-0.503392	-0.657039	-1.15461	-0.966575	-1.30026	-1.34292	-0.913544	-0.991038	-0.588486	fatty acid amide hydrolase	101103356	JEQ12_000286	GO:0017064	fatty acid amide hydrolase activity	oas04723	Retrograde endocannabinoid signaling	K15528					PF01425	Amidase	Amidase	IPR020556,IPR023631,IPR036928	Conserved_site|Domain|Homologous_superfamily
A0A6P3E3X3	JEQ12_015348	Asparagine synthetase [glutamine-hydrolyzing]	64.2496	A0A6P3E3X3	JEQ12_015348	Asparagine synthetase [glutamine-hydrolyzing]	1.12657e-28	50.9512	0.197345	0.656355	0.406553	0.55318	0.692835	0.195212	0.656866	0.528793	0.233462	0.466001	0.232798	0.294444	0.244736	0.76137	0.816859	0.489588	0.296751	0.826516	0.00702568	0.189562	0.120478	0.626736	1.02473	0.905666	Asparagine synthetase [glutamine-hydrolyzing]	101120073	JEQ12_015348	GO:0006529,GO:0006541,GO:0004066,GO:0005524	asparagine biosynthetic process|glutamine metabolic process|asparagine synthase (glutamine-hydrolyzing) activity|ATP binding	oas00250	Alanine, aspartate and glutamate metabolism	K01953					PF00733,PF13537	Asn_synthase|GATase_7	Asparagine synthase|Glutamine amidotransferase domain	IPR006426,IPR001962,IPR033738,IPR017932,IPR029055,IPR014729	Family|Domain|Domain|Domain|Homologous_superfamily|Homologous_superfamily
A0A6P3E3Z1	BTF3L4	Transcription factor BTF3	17.3146	A0A6P3E3Z1	BTF3L4	Transcription factor BTF3	8.27734e-35	52.9356	0.740278	0.6844	0.767681	0.761413	1.09552	0.642913	0.73713	0.960867	1.04594	0.965463	0.927968	0.60172	0.777343	0.830988	0.717345	0.953231	0.897129	0.713734	0.988064	0.747072	0.959025	1.1217	0.775987	0.893489	Transcription factor BTF3	101112859	BTF3L4						KOG2240	K	protein transport	Transcription	PF01849	NAC	NAC domain	IPR039370,IPR038187,IPR002715	Family|Homologous_superfamily|Domain
A0A6P3E3Z5	JEQ12_000337	Uncharacterized protein	25.8651	A0A6P3E3Z5;W5P697	JEQ12_000337;LOC101116001	Uncharacterized protein;Cytochrome c oxidase assembly factor 7	2.72062e-41	54.8779	-1.03899	-0.996138	-1.25692	-0.971295	-0.554368	-1.16327	-1.03794	-0.741063	-0.840589	-1.39724	-1.91086	-0.845846	-1.05617	-0.770459	-1.3962	-0.928215	-0.539697	-1.11541	-0.825813	-1.01302	-0.865019	-0.954361	-1.63923	-0.990107	Uncharacterized protein	101116001	JEQ12_000337	GO:0005758	mitochondrial intermembrane space	oas04714	Thermogenesis	K18180					PF08238	Sel1	Sel1 repeat	IPR040239,IPR006597,IPR011990	Family|Repeat|Homologous_superfamily
A0A6P3E3Z9	JEQ12_015120	Uncharacterized protein	20.981	A0A6P3E3Z9;W5QGM7	JEQ12_015120;LOC101102223	Uncharacterized protein;Histone H1.0	2.72742e-15	45.9716	4.53244	4.12432	4.07359	4.52666	4.31751	4.50608	4.44114	4.06156	4.66016	3.9621	4.52103	4.36981	4.398	4.50758	4.45331	3.90841	4.2763	4.45974	4.64479	4.46673	4.52044	4.5728	4.3643	4.3242	Uncharacterized protein	101102223	JEQ12_015120	GO:0006334,GO:0000786,GO:0005634,GO:0003677,GO:0030527	nucleosome assembly|nucleosome|nucleus|DNA binding|structural constituent of chromatin								PF00538	Linker_histone	linker histone H1 and H5 family	IPR005819,IPR005818,IPR036388,IPR036390	Family|Domain|Homologous_superfamily|Homologous_superfamily
A0A6P3E402	JEQ12_000360	Intraflagellar transport protein 25 homolog	16.3445	A0A6P3E402;A0A6P7E7U2	JEQ12_000360;HSPB11	Intraflagellar transport protein 25 homolog;Heat shock protein family B (small) member 11	5.25428e-06	41.4228	0.654846	0.735569	0.110874	0.16863	0.915565	-0.62898	1.14524	-0.920997	-0.521525	-0.0590848	-1.55974	-0.846792	-0.193567	0.00462072	-0.582517	-0.971264	-0.0559407	-1.31332	0.373363	0.100385	1.04781	0.156621	-0.210091	-0.737866	Intraflagellar transport protein 25 homolog	101120452	JEQ12_000360	GO:0042073,GO:0005929,GO:0030992	intraciliary transport|cilium|intraciliary transport particle B											IPR008979,IPR033558	Homologous_superfamily|Family
A0A6P3E407	JEQ12_015455	LRRCT domain-containing protein	51.9259	A0A6P3E407;W5QC28	JEQ12_015455;LRRC17	LRRCT domain-containing protein;Leucine rich repeat containing 17	3.60129e-23	49.0656	-0.0560894	0.69733	0.161464	-0.352459	0.0601286	0.0596641	-0.19619	-0.114005	0.33079	-0.647813	-0.724731	0.580661	0.40531	0.7151	-0.159974	-0.290474	0.0302057	-0.0482633	0.35508	0.512531	-0.480534	0.137973	-0.286823	-0.167465	LRRCT domain-containing protein	101118781	JEQ12_015455										PF13855	LRR_8	Leucine rich repeat	IPR000483,IPR001611,IPR003591,IPR032675	Domain|Repeat|Repeat|Homologous_superfamily
A0A6P3E411	JEQ12_015152	Uncharacterized protein	46.0518	A0A6P3E411;W5Q4S3	JEQ12_015152;RPL3	Uncharacterized protein;Ribosomal protein L3	1.92233e-35	53.1313	5.27151	5.57146	5.65715	5.5288	5.46742	5.54472	5.51793	5.45618	5.32735	5.7278	5.71592	5.45261	5.277	5.53884	5.61786	5.44389	5.4315	5.54294	5.3144	5.28528	5.5719	5.59497	5.40896	5.7582	Uncharacterized protein	101106836	JEQ12_015152	GO:0006412,GO:1990904,GO:0005840,GO:0003735	translation|ribonucleoprotein complex|ribosome|structural constituent of ribosome	oas03010,oas05171	Ribosome|Coronavirus disease - COVID-19	K02925					PF00297	Ribosomal_L3	Ribosomal protein L3	IPR045077,IPR000597,IPR019926,IPR044892,IPR009000	Family|Family|Conserved_site|Homologous_superfamily|Homologous_superfamily
A0A6P3E413	JEQ12_000390	BZIP domain-containing protein	36.068	A0A6P3E413;Q8HY25;Q9N0T4;W5PJV1	JEQ12_000390;c-jun;;JUN	BZIP domain-containing protein;C-Jun protein (Fragment);C-jun (Fragment);Jun proto-oncogene, AP-1 transcription factor subunit	3.39919e-15	45.9287	-1.49756	-2.39351	-1.47994	-1.5127	-0.963387	-1.00982	-0.922163	-1.20454	-2.06067	-1.32217	-0.998267	-1.19914	-1.13907	-0.793953	-0.887941	-1.23469	-1.34268	-1.28458	-1.91851	-1.65061	-1.5186	-1.4861	-1.45032	-1.52528	BZIP domain-containing protein	443219	JEQ12_000390	GO:0005634,GO:0003677,GO:0003700	nucleus|DNA binding|DNA-binding transcription factor activity	oas04010,oas04012,oas04310,oas04668,oas04024,oas04137,oas04210,oas04510,oas04530,oas04620,oas04621,oas04625,oas04660,oas04658,oas04659,oas04657,oas04662,oas04912,oas04915,oas04921,oas04926,oas04722,oas04380,oas05200,oas05207,oas05208,oas05203,oas05231,oas05235,oas05210,oas05211,oas05224,oas05166,oas05170,oas05161,oas05171,oas05162,oas05167,oas05169,oas05132,oas05135,oas05133,oas05140,oas05142,oas…	MAPK signaling pathway|ErbB signaling pathway|Wnt signaling pathway|TNF signaling pathway|cAMP signaling pathway|Mitophagy - animal|Apoptosis|Focal adhesion|Tight junction|Toll-like receptor signaling pathway|NOD-like receptor signaling pathway|C-type lectin receptor signaling pathway|T cell receptor signaling pathway|Th1 and Th2 cell differentiation|Th17 cell differentiation|IL-17 signaling path…	K04448					PF00170,PF03957	bZIP_1|Jun	bZIP transcription factor|Jun-like transcription factor	IPR004827,IPR046347,IPR005643,IPR002112,IPR008917	Domain|Homologous_superfamily|Domain|Family|Homologous_superfamily
A0A6P3E416	JEQ12_000408	Uncharacterized protein	53.3139	A0A6P3E416;W5PI76	JEQ12_000408;ANGPTL3	Uncharacterized protein;Angiopoietin like 3	2.25716e-24	49.4879	-0.598159	0.503054	-0.275589	-0.773764	-1.25669	-0.83001	-1.36627	-0.5396	-0.976629	-0.53721	-0.453576	-0.24766	-0.70736	-0.0600766	0.43343	-0.724703	-0.873781	-0.559439	-0.658673	-0.507317	-0.495849	-1.65572	-1.06295	-0.644781	Uncharacterized protein	101107481	JEQ12_000408	GO:0005576	extracellular region	oas04979	Cholesterol metabolism	K22288					PF00147	Fibrinogen_C	Fibrinogen beta and gamma chains, C-terminal globular domain	IPR036056,IPR014716,IPR002181	Homologous_superfamily|Homologous_superfamily|Domain
A0A6P3E417	JEQ12_015171	Uncharacterized protein	12.2739	A0A6P3E417	JEQ12_015171	Uncharacterized protein	1.1651e-17	46.9828	0.878644	0.93147	1.1004	1.3303	1.32303	1.73074	1.13761	1.35762	0.916004	1.5658	1.77635	1.77985	1.37356	1.28475	1.39846	1.53998	1.31263	1.62875	0.480352	0.771802	1.14723	0.862112	1.2002	1.67675	Uncharacterized protein	101109871	JEQ12_015171	GO:0008270	zinc ion binding	oas04141,oas04120,oas03420,oas04310,oas04350,oas04066,oas04110,oas04114,oas04710,oas05200,oas05211,oas05170	Protein processing in endoplasmic reticulum|Ubiquitin mediated proteolysis|Nucleotide excision repair|Wnt signaling pathway|TGF-beta signaling pathway|HIF-1 signaling pathway|Cell cycle|Oocyte meiosis|Circadian rhythm|Pathways in cancer|Renal cell carcinoma|Human immunodeficiency virus 1 infection	K03868					PF12678	zf-rbx1	RING-H2 zinc finger domain	IPR001841,IPR013083,IPR024766	Domain|Homologous_superfamily|Domain
A0A6P3E418	JEQ12_015482	HMG box-containing protein 1	58.3241	A0A6P3E418	JEQ12_015482	HMG box-containing protein 1	1.2267e-28	50.9385	-1.62773	-2.79804	-2.10671	-2.45694	-1.78869	-1.69789	-2.17266	-2.16222	-2.45255	-2.24095	-2.10227	-1.89728	-1.9351	-2.25795	-1.87525	-2.75669	-2.15336	-1.83249	-2.20292	-2.53715	-2.16288	-2.21785	-2.2554	-2.01686	HMG box-containing protein 1	101103467	JEQ12_015482	GO:0090304,GO:0006355,GO:0005634,GO:0003677,GO:0003723	nucleic acid metabolic process|regulation of DNA-templated transcription|nucleus|DNA binding|RNA binding								PF08517,PF00505	AXH|HMG_box	Ataxin-1 and HBP1 module (AXH)|HMG (high mobility group) box	IPR003652,IPR036096,IPR039655,IPR009071,IPR036910	Domain|Homologous_superfamily|Family|Domain|Homologous_superfamily
A0A6P3E423	JEQ12_015492	Uncharacterized protein	88.6892	A0A6P3E423;W5PDT8	JEQ12_015492;PNPLA8	Uncharacterized protein;Patatin like phospholipase domain containing 8	3.04253e-38	53.9834	-0.704736	-0.948824	-0.865516	-1.37579	-1.49161	-1.36991	-1.63683	-1.43271	-1.48426	-1.57379	-1.21875	-0.756091	-1.67233	-1.36444	-0.615895	-1.33699	-1.43326	-1.35294	-1.74018	-0.952847	-1.42747	-0.600712	-1.57883	-1.72225	Uncharacterized protein	101106930	JEQ12_015492	GO:0016042,GO:0004620	lipid catabolic process|phospholipase activity								PF01734	Patatin	Patatin-like phospholipase	IPR016035,IPR045217,IPR002641	Homologous_superfamily|Domain|Domain
A0A6P3E429	JEQ12_000449	Cystathionine gamma-lyase	44.4358	A0A6P3E429;W5PQY2;W5PQY4	JEQ12_000449;CTH;CTH	Cystathionine gamma-lyase	3.49225e-31	51.7787	1.00438	1.35295	1.04803	0.879317	1.34477	0.753731	1.16016	0.872254	1.02118	1.43749	0.680372	0.96604	0.838568	1.34248	0.918078	1.06132	0.694648	1.08982	0.515193	0.70182	0.789241	1.42264	1.29414	1.24327	Cystathionine gamma-lyase	101118487	JEQ12_000449	GO:0019344,GO:0019346,GO:0004123,GO:0080146,GO:0044540,GO:0030170	cysteine biosynthetic process|transsulfuration|cystathionine gamma-lyase activity|L-cysteine desulfhydrase activity|L-cystine L-cysteine-lyase (deaminating)|pyridoxal phosphate binding	oas00260,oas00270,oas00450	Glycine, serine and threonine metabolism|Cysteine and methionine metabolism|Selenocompound metabolism	K01758					PF01053	Cys_Met_Meta_PP	Cys/Met metabolism PLP-dependent enzyme	IPR000277,IPR015424,IPR015421,IPR015422	Family|Homologous_superfamily|Homologous_superfamily|Homologous_superfamily
A0A6P3E438	JEQ12_015544	Uncharacterized protein	99.0142	A0A6P3E438	JEQ12_015544	Uncharacterized protein	0.00178454	33.6748	0.679558	0.136275	2.62515	-2.54407	-2.082	-5.37541	-1.47127	-2.93669	-2.58622	-2.84156	-2.82194	-1.8399	-2.10273	-2.55507	-2.11784	-1.80532	3.30345	0.879076	-2.28916	-2.31017	-2.02808	-2.47559	-2.20871	-3.09639	Uncharacterized protein	101118868	JEQ12_015544	GO:0034464	BBSome								PF14728,PF14727	PHTB1_C|PHTB1_N	PTHB1 C-terminus|PTHB1 N-terminus	IPR028074,IPR028073,IPR026511	Domain|Domain|Family
A0A6P3E440	JEQ12_015220	Uncharacterized protein	51.8961	A0A6P3E440;W5QD80	JEQ12_015220;SAMM50	Uncharacterized protein;SAMM50 sorting and assembly machinery component	1.65166e-23	49.1853	2.11045	2.46014	2.52812	2.36479	2.16814	2.38583	2.5902	2.37974	2.18306	2.57665	2.51902	2.37588	2.46937	2.4885	2.57466	2.46446	2.40451	2.56918	2.29262	2.16755	2.41148	2.4468	2.67257	2.59458	Uncharacterized protein	101117919	JEQ12_015220	GO:0005741	mitochondrial outer membrane								PF01103	Omp85	Omp85 superfamily domain	IPR000184,IPR039910,IPR034746	Domain|Family|Domain
A0A6P3E457	LOC114115302	Transmembrane p24 trafficking protein 5	25.8476	A0A6P3E457;A0A6P7E6I8	LOC114115302;JEQ12_000555	Transmembrane p24 trafficking protein 5;GOLD domain-containing protein	3.85352e-18	47.1779	1.16435	0.511623	0.76719	0.988042	0.802614	1.11192	0.830084	1.07776	1.18103	0.68638	0.784941	1.06768	1.11732	0.995764	0.737193	1.23319	1.00839	1.05446	1.26533	0.985162	1.00214	1.17031	1.23921	0.580376	Transmembrane p24 trafficking protein 5	101105612	LOC114115302	GO:0015031,GO:0005789,GO:0033116,GO:0005794	protein transport|endoplasmic reticulum membrane|endoplasmic reticulum-Golgi intermediate compartment membrane|Golgi apparatus				KOG3287	S	Golgi ribbon formation	Function unknown	PF01105	EMP24_GP25L	emp24/gp25L/p24 family/GOLD	IPR015720,IPR009038,IPR036598	Family|Domain|Homologous_superfamily
A0A6P3E460	JEQ12_015626	Uncharacterized protein	71.6374	A0A6P3E460;W5PWK3	JEQ12_015626;TBRG4	Uncharacterized protein;Transforming growth factor beta regulator 4	1.80142e-25	49.8681	-0.752114	-0.168569	-0.402066	-0.419733	-0.451268	-0.733101	-0.655409	-0.499487	-0.511155	-0.275284	-0.682926	-1.01201	-0.863729	-0.471705	-0.721969	-0.708458	-0.544789	-0.162157	-0.892575	-0.76913	-0.710596	-0.669347	-0.582839	-0.35242	Uncharacterized protein	101113841	JEQ12_015626	GO:0044528	regulation of mitochondrial mRNA stability								PF06743,PF08368,PF08373	FAST_1|FAST_2|RAP	FAST kinase-like protein, subdomain 1|FAST kinase-like protein, subdomain 2|RAP domain	IPR013579,IPR010622,IPR013584	Domain|Domain|Domain
A0A6P3E476	JEQ12_007930	Uncharacterized protein	14.2871	A0A6P3E476;A0A835ZXV4;A0A836ADP4;W5QCJ9	JEQ12_007930;JEQ12_002132;JEQ12_000627;TAF13	Uncharacterized protein;Transcription initiation factor TFIID subunit 13;Transcription initiation factor TFIID subunit 13;TATA-box binding protein associated factor 13	0.000857794	36.2695	-4.75391	-4.25531	-4.18106	-3.73714	-2.60875	-4.537	-4.09776	-2.92115	-4.16259	-2.24114	-5.63304	-3.82187	-4.48021	-3.66071	-2.6287	-3.78533	-4.62363	-4.02773	-4.68196	-2.83826	-4.35483	-2.62451	-3.47995	-3.4751	Uncharacterized protein	101102102	JEQ12_007930	GO:0006366,GO:0005634,GO:0046982	transcription by RNA polymerase II|nucleus|protein heterodimerization activity	oas03022	Basal transcription factors	K03127					PF02269	TFIID-18kDa	Transcription initiation factor IID, 18kD subunit	IPR009072,IPR003195	Homologous_superfamily|Family
A0A6P3E480	JEQ12_000633	Proteasome subunit alpha type	26.411	A0A6P3E480;W5QD30	JEQ12_000633;PSMA5	Proteasome subunit alpha type	3.50446e-28	50.7868	3.34659	3.38298	3.51609	3.53217	3.5532	3.63716	3.47309	3.5759	3.50189	3.74723	3.57175	3.5308	3.46112	3.438	3.29245	3.53989	3.55509	3.5784	3.57684	3.62888	3.61811	3.75794	3.74635	3.62272	Proteasome subunit alpha type	101104946	JEQ12_000633	GO:0043161,GO:0005737,GO:0005634,GO:0019773	proteasome-mediated ubiquitin-dependent protein catabolic process|cytoplasm|nucleus|proteasome core complex, alpha-subunit complex	oas03050,oas05010,oas05012,oas05014,oas05016,oas05017,oas05020,oas05022	Proteasome|Alzheimer disease|Parkinson disease|Amyotrophic lateral sclerosis|Huntington disease|Spinocerebellar ataxia|Prion disease|Pathways of neurodegeneration - multiple diseases	K02729					PF00227,PF10584	Proteasome|Proteasome_A_N	Proteasome subunit|Proteasome subunit A N-terminal signature	IPR029055,IPR023332,IPR033812,IPR000426,IPR001353	Homologous_superfamily|Family|Family|Domain|Family
A0A6P3E482	JEQ12_015704	Exportin-1/Importin-beta-like domain-containing protein	104.082	A0A6P3E482;W5P1K4	JEQ12_015704;TNPO3	Exportin-1/Importin-beta-like domain-containing protein;Transportin 3	1.56266e-40	54.6567	1.16806	0.851288	1.09545	1.09659	1.30662	0.915618	1.13038	0.988922	0.947839	1.05171	1.11531	0.998532	1.17047	1.10806	1.21407	1.12455	1.14782	1.09171	1.02224	1.15645	1.32743	1.08676	1.14845	1.27418	Exportin-1/Importin-beta-like domain-containing protein	101113231	JEQ12_015704	GO:0033036,GO:0006913,GO:0071702	macromolecule localization|nucleocytoplasmic transport|organic substance transport	oas03013,oas03250	Nucleocytoplasmic transport|Viral life cycle - HIV-1	K15436					PF08389	Xpo1	Exportin 1-like protein	IPR011989,IPR016024,IPR013598	Homologous_superfamily|Homologous_superfamily|Domain
A0A6P3E495	JEQ12_015747	Uncharacterized protein	12.8888	A0A6P3E495	JEQ12_015747	Uncharacterized protein	4.33104e-58	59.2527	3.84451	4.0304	3.97518	3.81481	3.8594	4.07827	3.95379	4.17798	3.87314	4.24356	4.15376	3.92414	3.79095	3.99821	4.17803	3.8839	3.91881	4.20227	3.88375	4.04041	4.07499	4.02814	3.98095	4.2696	Uncharacterized protein	101102640	JEQ12_015747										PF12796	Ank_2	Ankyrin repeats (3 copies)	IPR002110,IPR036770	Repeat|Homologous_superfamily
A0A6P3E497	JEQ12_000684	F-actin-capping protein subunit alpha	32.9598	A0A6P3E497;A0A836D5L0;W5Q694	JEQ12_000684;JEQ12_009632;	F-actin-capping protein subunit alpha	1.00531e-30	51.6282	3.84284	3.71208	4.00065	3.93258	3.71289	4.06274	3.73823	4.21896	3.90402	4.22481	4.11388	3.97236	4.06178	4.12904	3.896	4.13684	3.88541	4.03919	4.29739	4.19918	3.84196	4.10234	4.02107	4.18598	F-actin-capping protein subunit alpha	101117461	JEQ12_000684	GO:0051016,GO:0008290,GO:0003779	barbed-end actin filament capping|F-actin capping protein complex|actin binding	oas04144,oas04814	Endocytosis|Motor proteins	K10364					PF01267	F-actin_cap_A	F-actin capping protein alpha subunit	IPR002189,IPR037282,IPR042276,IPR042489,IPR017865	Family|Homologous_superfamily|Homologous_superfamily|Homologous_superfamily|Conserved_site
A0A6P3E498	JEQ12_015764	Uncharacterized protein	46.5228	A0A6P3E498	JEQ12_015764	Uncharacterized protein	4.25409e-40	54.5302	2.62539	2.47159	2.53949	2.64335	2.60867	2.6512	2.41355	2.52952	2.44428	2.46619	2.72193	2.58398	2.37851	2.68639	2.65469	2.3363	2.5855	2.71885	2.50739	2.43421	2.55849	2.73362	2.54818	2.70648	Uncharacterized protein	101105324	JEQ12_015764	GO:0006376,GO:0005685,GO:0003729	mRNA splice site selection|U1 snRNP|mRNA binding								PF03194	LUC7	LUC7 N_terminus	IPR004882	Family
A0A6P3E4B2	JEQ12_000723	Uncharacterized protein	56.2649	A0A6P3E4B2;W5QGH2;W5QGH4	JEQ12_000723;GDAP2;GDAP2	Uncharacterized protein;Ganglioside induced differentiation associated protein 2;Ganglioside induced differentiation associated protein 2	2.23465e-12	44.6326	-1.64534	-2.06515	-2.05755	-1.77274	-2.2978	-2.74768	-1.72512	-2.29987	-1.71608	-1.8559	-1.70227	-1.80667	-1.74029	-1.35499	-1.82999	-1.22715	-2.29224	-1.43211	-1.79109	-1.96381	-2.10374	-1.94656	-1.37027	-1.71868	Uncharacterized protein	101108971	JEQ12_000723										PF13716,PF01661	CRAL_TRIO_2|Macro	Divergent CRAL/TRIO domain|Macro domain	IPR001251,IPR036865,IPR002589,IPR043472,IPR035793	Domain|Homologous_superfamily|Domain|Homologous_superfamily|Domain
A0A6P3E4C1	JEQ12_000766	Uncharacterized protein	52.9239	A0A6P3E4C1;W5QH91	JEQ12_000766;LOC101115331	Uncharacterized protein;Golgi pH regulator	1.75243e-09	43.4799	-0.538475	0.907531	-0.472103	-0.407621	-0.399558	-0.27595	-0.136921	-0.477168	-0.299104	-0.714357	-1.21159	-0.844015	-0.272252	-0.797755	-1.13286	0.308811	-0.0190424	-0.707758	-0.366941	-0.354086	-0.419102	-0.468802	-0.593114	-0.983152	Uncharacterized protein	101115331	JEQ12_000766	GO:0034765,GO:0016020,GO:0005244	regulation of monoatomic ion transmembrane transport|membrane|voltage-gated monoatomic ion channel activity								PF12430,PF12537	ABA_GPCR|GPHR_N	Abscisic acid G-protein coupled receptor |The Golgi pH Regulator (GPHR) Family N-terminal	IPR025969,IPR022535,IPR015672	Domain|Domain|Family
A0A6P3E4C6	JEQ12_015387	Twist-related protein 1	20.8541	A0A6P3E4C6;W5PJ37	JEQ12_015387;	Twist-related protein 1	2.78937e-22	48.7471	-3.13586	-3.27543	-2.41462	-3.07658	-2.39478	-3.02301	-2.31355	-3.13652	-3.20562	-2.92514	-2.97773	-2.70265	-3.11658	-2.32185	-2.33046	-3.27504	-2.26658	-2.32222	-4.00285	-2.83339	-2.71212	-2.5621	-2.26795	-2.37749	Twist-related protein 1	101119467	JEQ12_015387	GO:0000981,GO:0046983	DNA-binding transcription factor activity, RNA polymerase II-specific|protein dimerization activity	oas05205	Proteoglycans in cancer	K09069					PF00010	HLH	Helix-loop-helix DNA-binding domain	IPR011598,IPR036638	Domain|Homologous_superfamily
A0A6P3E4D8	JEQ12_000813	Uncharacterized protein	13.377	A0A6P3E4D8;W5QI48	JEQ12_000813;ENSA	Uncharacterized protein;Endosulfine alpha	7.22192e-11	44.0233	0.746937	0.924907	1.33965	1.15914	0.746168	1.88946	1.28627	1.01398	0.2807	1.37695	1.14326	1.39062	0.247962	0.968687	1.48941	0.419204	1.07487	0.864698	-0.231296	0.160469	0.730209	0.780006	-0.26602	0.821482	Uncharacterized protein	101107055	JEQ12_000813	GO:0007049,GO:0051301,GO:0005737,GO:0004864	cell cycle|cell division|cytoplasm|protein phosphatase inhibitor activity								PF04667	Endosulfine	cAMP-regulated phosphoprotein/endosulfine conserved region	IPR006760	Family
A0A6P3E4E2	JEQ12_000822	Uncharacterized protein	40.0061	A0A6P3E4E2;W5QID1	JEQ12_000822;BNIPL	Uncharacterized protein;BCL2 interacting protein like	2.66655e-28	50.8261	-0.183201	-0.68221	0.0348545	0.0798659	0.405136	0.186774	0.127612	9.01743e-05	-0.262672	0.555967	0.633526	0.309752	0.12008	0.173111	0.222039	0.617208	-0.48415	-0.106673	-0.760048	-0.0387261	-0.220391	0.152123	0.521003	0.457647	Uncharacterized protein	101110283	JEQ12_000822	GO:0110165	cellular anatomical entity								PF12496,PF13716	BNIP2|CRAL_TRIO_2	Bcl2-/adenovirus E1B nineteen kDa-interacting protein 2|Divergent CRAL/TRIO domain	IPR022181,IPR001251,IPR036865	Family|Domain|Homologous_superfamily
A0A6P3E4E9	JEQ12_016112	Uncharacterized protein	40.8462	A0A6P3E4E9;W5Q9U7	JEQ12_016112;HAUS8	Uncharacterized protein;HAUS augmin like complex subunit 8	0.00222446	32.3661		-1.09751	-1.62083	-2.12933	-1.80524	-2.05029	-1.91667	-1.32613	-2.51572	-1.90088	-2.10074	-2.52728	-2.57733	-1.76148	-1.83056	-1.45399		-1.25167		-1.68948		-1.12293	-1.30776	-1.78457	Uncharacterized protein	101114439	JEQ12_016112
A0A6P3E4F6	JEQ12_016126	Protein FAM32A	13.1783	A0A6P3E4F6;W5NQ52	JEQ12_016126;FAM32A	Protein FAM32A	5.44791e-05	39.8705	0.554883	0.450978	-0.547221	1.14067	1.14326	0.867907	0.581086	-0.411596	0.885683	-0.414328	-0.360559	-0.433416	0.192564	0.445191	0.230271	0.976006	0.630411	0.71123	1.21976	0.727804	1.11475	0.978039	0.362852	0.431534	Protein FAM32A	101116725	JEQ12_016126										PF08555	FAM32A	FAM32A	IPR013865	Family
A0A6P3E4F9	JEQ12_000880	Uncharacterized protein	13.4367	A0A6P3E4F9	JEQ12_000880	Uncharacterized protein	1.03995e-38	54.1214	4.72644	4.46559	4.33381	4.45901	5.08104	5.08505	4.09704	4.70107	4.21222	4.85472	4.8857	4.41111	4.30713	4.11859	5.26745	4.96257	3.57719	4.04362	3.37665	4.03043	3.39367	4.38573	4.13416	5.1539	Uncharacterized protein	101102105	JEQ12_000880										PF02389	Cornifin	Cornifin (SPRR) family
A0A6P3E4G0	JEQ12_016160	2-hydroxyacyl-CoA lyase 2	68.1052	A0A6P3E4G0;W5P2A5	JEQ12_016160;ILVBL	2-hydroxyacyl-CoA lyase 2	5.48165e-27	50.3845	2.27958	2.05904	2.24291	2.15123	2.47307	2.28626	2.5279	2.1205	2.27848	2.30785	2.54909	1.94164	2.4082	2.07012	1.95765	2.45787	1.97147	2.07533	2.30474	2.44735	2.55546	2.23203	1.88696	2.08924	2-hydroxyacyl-CoA lyase 2	101120571	JEQ12_016160	GO:0006631,GO:0003824,GO:0000287,GO:0030976	fatty acid metabolic process|catalytic activity|magnesium ion binding|thiamine pyrophosphate binding								PF02775,PF00205,PF02776	TPP_enzyme_C|TPP_enzyme_M|TPP_enzyme_N	Thiamine pyrophosphate enzyme, C-terminal TPP binding domain|Thiamine pyrophosphate enzyme, central domain|Thiamine pyrophosphate enzyme, N-terminal TPP binding domain	IPR029035,IPR029061,IPR012000,IPR012001,IPR000399,IPR045229,IPR011766	Homologous_superfamily|Homologous_superfamily|Domain|Domain|Conserved_site|Family|Domain
A0A6P3E4G8	JEQ12_015327	Uncharacterized protein	111.004	A0A6P3E4G8;W5NPU5;W5NPV0	JEQ12_015327;VPS50;VPS50	Uncharacterized protein;VPS50 subunit of EARP/GARPII complex;VPS50 subunit of EARP/GARPII complex	8.67166e-33	52.2964	-0.0185096	-0.160503	0.0386361	0.107472	0.304616	0.208035	0.238422	0.104514	0.170341	0.0180806	0.0331587	0.156585	0.173411	0.107351	-0.0693741	0.159266	0.218715	0.0412874	0.0890131	0.189892	0.372446	0.263409	0.205738	0.290261	Uncharacterized protein	101112807	JEQ12_015327	GO:0032456,GO:0015031,GO:0042147,GO:0005829,GO:1990745	endocytic recycling|protein transport|retrograde transport, endosome to Golgi|cytosol|EARP complex								PF10474,PF10475	DUF2451|Vps54_N	Protein of unknown function C-terminus (DUF2451)|Vacuolar-sorting protein 54, of GARP complex	IPR019514,IPR040047,IPR019515	Domain|Family|Domain
A0A6P3E4H2	JEQ12_016255	deoxyribonuclease II	41.1905	A0A6P3E4H2;W5PKV1	JEQ12_016255;DNASE2	deoxyribonuclease II	8.44074e-23	48.9332	1.23308	1.55629	1.42183	1.41537	1.53194	1.01916	1.46612	1.67632	1.22628	1.65214	1.52301	1.3382	1.55188	0.974994	1.68027	1.68098	1.44982	1.58847	1.23338	1.25165	1.60363	1.65468	1.4706	1.59574	deoxyribonuclease II	101105493	JEQ12_016255	GO:0004531	deoxyribonuclease II activity	oas04142,oas04623	Lysosome|Cytosolic DNA-sensing pathway	K01158					PF03265	DNase_II	Deoxyribonuclease II	IPR004947	Family
A0A6P3E4H3	JEQ12_015336	Paraoxonase	39.7065	A0A6P3E4H3	JEQ12_015336	Paraoxonase	7.6687e-36	53.2544	4.17453	3.27744	4.09224	4.47181	3.56913	4.0571	3.09237	4.48088	2.59088	4.09423	4.40237	3.87715	3.91029	4.28794	4.05526	3.9674	4.19824	4.08267	4.24321	3.39151	4.48084	4.14233	3.9814	4.16891	Paraoxonase	100337686	JEQ12_015336	GO:0102007,GO:0004064,GO:0046872	acyl-L-homoserine-lactone lactonohydrolase activity|arylesterase activity|metal ion binding								PF01731	Arylesterase	Arylesterase	IPR011042,IPR002640	Homologous_superfamily|Family
A0A6P3E4H8	JEQ12_015341	Uncharacterized protein	74.2658	A0A6P3E4H8;W5P1S3	JEQ12_015341;SLC25A13	Uncharacterized protein;Solute carrier family 25 member 13	8.91689e-24	49.2794	1.75549	1.9343	1.89355	1.7265	1.81274	1.79037	1.93414	1.88904	1.872	1.7878	1.70264	1.68447	1.97391	1.76775	1.79117	1.87301	1.86179	1.8638	1.56877	1.71775	1.87069	1.85881	1.59313	1.83311	Uncharacterized protein	101118780	JEQ12_015341	GO:0055085,GO:0005743,GO:0005509	transmembrane transport|mitochondrial inner membrane|calcium ion binding								PF00153	Mito_carr	Mitochondrial carrier protein	IPR011992,IPR002048,IPR002067,IPR018108,IPR023395	Homologous_superfamily|Domain|Family|Repeat|Homologous_superfamily
A0A6P3E4I2	JEQ12_016324	Hsp90 co-chaperone Cdc37	44.5802	A0A6P3E4I2;W5Q3Q7	JEQ12_016324;CDC37	Hsp90 co-chaperone Cdc37	8.59799e-31	51.6511	1.49998	1.7405	1.5863	1.42846	1.49798	1.45353	1.66972	1.53399	1.76658	1.49701	1.62839	1.50838	1.67665	1.6022	1.58821	1.53718	1.37801	1.62335	1.61832	1.80649	1.72081	1.62259	1.28503	1.55213	Hsp90 co-chaperone Cdc37	101113585	JEQ12_016324	GO:0005737,GO:0019901	cytoplasm|protein kinase binding	oas04151	PI3K-Akt signaling pathway	K09554					PF08564,PF08565,PF03234	CDC37_C|CDC37_M|CDC37_N	Cdc37 C terminal domain|Cdc37 Hsp90 binding domain|Cdc37 N terminal kinase binding	IPR004918,IPR013873,IPR013874,IPR038189,IPR013855	Family|Domain|Domain|Homologous_superfamily|Domain
A0A6P3E4J4	JEQ12_016369	Polycystin cation channel PKD1/PKD2 domain-containing protein	65.0335	A0A6P3E4J4;W5NSJ1;W5NSJ3	JEQ12_016369;MCOLN1;MCOLN1	Polycystin cation channel PKD1/PKD2 domain-containing protein;Mucolipin 1;Mucolipin 1	1.99189e-08	43.0167	-0.447089	-0.767314	-0.189069	-0.0710477	-0.0735307	-0.609493	-0.340784	-0.520065	-0.156179	-0.254416	-0.513315	-0.45149	-0.703594	-0.648525	-0.0928037	-0.307269	-0.423087	-0.442243	-0.780575	-0.687156	-0.541671	-0.206655	-0.74733	-0.842205	Polycystin cation channel PKD1/PKD2 domain-containing protein	101121931	JEQ12_016369	GO:0010008,GO:0005886,GO:0005261	endosome membrane|plasma membrane|monoatomic cation channel activity	oas04020,oas04142	Calcium signaling pathway|Lysosome	K04992					PF08016	PKD_channel	Polycystin cation channel	IPR039031,IPR013122	Family|Domain
A0A6P3E4L1	CCDC126	Coiled-coil domain containing 126	15.6073	A0A6P3E4L1;A0A6P3TMQ1	CCDC126;JEQ12_015412	Coiled-coil domain containing 126;Coiled-coil domain-containing protein 126	8.01554e-13	44.8311	-2.76745	-2.56074	-2.49989	-3.00411	-2.1502	-3.36225	-2.95747	-3.50185	-2.60524	-2.05216	-2.73063	-1.98814	-3.87028	-3.21895	-2.16563	-2.64771	-3.15075	-2.98214	-2.72836	-2.31188	-3.40283	-3.19648	-3.12517	-2.57655	Coiled-coil domain containing 126	101110932	CCDC126	GO:0005576	extracellular region				ENOG502RY1D	S	alpha-1,6-mannosylglycoprotein 6-beta-N-acetylglucosaminyltransferase activity	Function unknown	PF15027	DUF4525	Domain of unknown function (DUF4525)	IPR042759,IPR027833	Family|Family
A0A6P3E4L6	JEQ12_016518	LSM domain-containing protein	11.6024	A0A6P3E4L6;W5PX55	JEQ12_016518;LSM7	LSM domain-containing protein;LSM7 homolog, U6 small nuclear RNA and mRNA degradation associated	1.3945e-28	50.9199	-3.65969	-3.32749	-3.0603	-1.13994	-3.72434	-1.30242	-3.6551	-3.07905	-4.39327	-2.62394	-2.04381	-2.53115	-1.81321	-1.35495	-2.60564	-2.14612	-2.41401	-1.0492	-2.0403	-2.35403	-2.98725	-2.96896	-2.12427	-2.36645	LSM domain-containing protein	101121092	JEQ12_016518	GO:0000398,GO:0000956,GO:0005634	mRNA splicing, via spliceosome|nuclear-transcribed mRNA catabolic process|nucleus	oas03040,oas03018	Spliceosome|RNA degradation	K12626					PF01423	LSM	LSM domain	IPR017132,IPR044641,IPR001163,IPR010920	Family|Family|Domain|Homologous_superfamily
A0A6P3E4L7	JEQ12_001042	Atypical chemokine receptor 1	35.6689	A0A6P3E4L7;W5PCT3	JEQ12_001042;ACKR1	Atypical chemokine receptor 1	2.71582e-23	49.109	-1.25301	-0.511523	-1.34866	-2.29701	-2.01902	-2.69449	-3.40068	-0.655067	-1.60817	-1.01051	-2.80169	-1.44036	-0.869025	-2.06351	-0.604534	-1.99129	-1.59844	-0.773547	-1.12263	-0.746154	-2.16651	-1.42204	-1.65543	-0.764176	Atypical chemokine receptor 1	101113185	JEQ12_001042	GO:0070098,GO:0006954,GO:0005769,GO:0016020,GO:0055037,GO:0019956,GO:0004930	chemokine-mediated signaling pathway|inflammatory response|early endosome|membrane|recycling endosome|chemokine binding|G protein-coupled receptor activity	oas05144	Malaria	K06574								IPR005384	Family
A0A6P3E4M2	JEQ12_016559	Uncharacterized protein	66.4372	A0A6P3E4M2;W5Q9T3	JEQ12_016559;LMNB1	Uncharacterized protein;Lamin B1	1.67671e-31	51.8824	3.48661	3.56008	3.36197	3.42465	3.68102	3.67525	3.54452	3.42215	3.65636	3.40706	3.52707	3.45094	3.52765	3.60763	3.58944	3.48012	3.53818	3.60208	3.56659	3.58906	3.64744	3.68503	3.48697	3.54381	Uncharacterized protein	100037680	JEQ12_016559	GO:0005882,GO:0005652	intermediate filament|nuclear lamina	oas04210	Apoptosis	K07611					PF00038,PF00932	Filament|LTD	Intermediate filament protein|Lamin Tail Domain	IPR018039,IPR039008,IPR001322,IPR036415	Conserved_site|Domain|Domain|Homologous_superfamily
A0A6P3E4M9	JEQ12_001085	Junctional adhesion molecule A	32.4268	A0A6P3E4M9;W5PHN9	JEQ12_001085;F11R	Junctional adhesion molecule A	1.42422e-10	43.9102	1.61521	1.40654	1.73111	1.90196	2.29354	1.82443	1.881	1.84895	1.79591	1.40445	2.04208	1.31867	1.6192	1.45472	1.57141	1.16993	1.26155	1.81626	1.29221	1.19212	1.54981	1.45788	1.44243	1.25068	Junctional adhesion molecule A	780487	JEQ12_001085	GO:0007155,GO:0005923,GO:0005886	cell adhesion|bicellular tight junction|plasma membrane	oas04514,oas04530,oas04670	Cell adhesion molecules|Tight junction|Leukocyte transendothelial migration	K06089					PF13927	Ig_3	Immunoglobulin domain	IPR042456,IPR007110,IPR036179,IPR013783,IPR003599,IPR003598,IPR013106	Family|Domain|Homologous_superfamily|Homologous_superfamily|Domain|Domain|Domain
A0A6P3E4N0	JEQ12_016591	Uncharacterized protein	22.8362	A0A6P3E4N0;W5NV37;W5NV39	JEQ12_016591;COMMD10;COMMD10	Uncharacterized protein;COMM domain containing 10;COMM domain containing 10	4.82554e-28	50.7403	0.1564	-0.219719	0.0741541	-0.127456	0.222827	0.0802088	-0.211608	0.169847	0.384152	0.204656	0.162339	-0.0180204	-0.10551	0.0831684	0.213734	-0.102013	0.264932	-0.020403	0.153953	0.172227	0.13478	0.35645	0.0267848	0.16664	Uncharacterized protein	101116310	JEQ12_016591										PF07258	COMM_domain	COMM domain	IPR017920,IPR037361	Domain|Family
A0A6P3E4N1	JEQ12_001091	Uncharacterized protein	16.6478	A0A6P3E4N1;W5PID4	JEQ12_001091;PFDN2	Uncharacterized protein;Prefoldin subunit 2	5.87235e-12	44.4545	1.9312	1.95605	1.68631	2.12599	1.78767	2.53586	1.77474	1.80968	1.87734	2.09041	2.17906	1.71118	2.447	2.36022	2.21273	2.24977	1.49924	1.72179	2.25306	1.4883	1.502	2.19416	2.29673	2.19551	Uncharacterized protein	101102106	JEQ12_001091	GO:0006457,GO:0016272,GO:0051082	protein folding|prefoldin complex|unfolded protein binding								PF01920	Prefoldin_2	Prefoldin subunit	IPR027235,IPR002777,IPR009053	Family|Family|Homologous_superfamily
A0A6P3E4N2	JEQ12_016597	Uncharacterized protein	52.6365	A0A6P3E4N2	JEQ12_016597	Uncharacterized protein	9.79782e-27	50.2996	1.63833	1.34333	1.51394	1.37764	1.44718	1.38293	1.57455	1.54097	1.43851	1.70585	1.53305	1.42769	1.55776	1.39156	1.48414	1.37003	1.53733	1.6254	1.57086	1.43336	1.68839	1.8007	1.60401	1.65461	Uncharacterized protein	101117757	JEQ12_016597										PF14555,PF00789	UBA_4|UBX	UBA-like domain|UBX domain	IPR036249,IPR006577,IPR009060,IPR029071,IPR001012	Homologous_superfamily|Domain|Homologous_superfamily|Homologous_superfamily|Domain
A0A6P3E4N8	JEQ12_001104	Succinate dehydrogenase cytochrome b560 subunit, mitochondrial	18.4198	A0A6P3E4N8;W5PJW1	JEQ12_001104;SDHC	Succinate dehydrogenase cytochrome b560 subunit, mitochondrial;Succinate dehydrogenase cytochrome b560 subunit, mitochondrial	3.89078e-13	44.9754	2.33691	1.43264	1.60884	1.90434	2.12227	1.45487	2.10932	1.59825	2.03332	1.51473	1.52248	1.79857	1.87328	1.16236	1.9315	2.3162	1.61986	0.792696	1.74094	1.62831	1.7904	2.06574	2.02621	1.87006	Succinate dehydrogenase cytochrome b560 subunit, mitochondrial	101105616	JEQ12_001104	GO:0006099,GO:0045281,GO:0009055,GO:0046872,GO:0000104	tricarboxylic acid cycle|succinate dehydrogenase complex|electron transfer activity|metal ion binding|succinate dehydrogenase activity	oas00020,oas00190,oas04714,oas05208,oas05010,oas05012,oas05014,oas05016,oas05020,oas05022,oas05415,oas04932	Citrate cycle (TCA cycle)|Oxidative phosphorylation|Thermogenesis|Chemical carcinogenesis - reactive oxygen species|Alzheimer disease|Parkinson disease|Amyotrophic lateral sclerosis|Huntington disease|Prion disease|Pathways of neurodegeneration - multiple diseases|Diabetic cardiomyopathy|Non-alcoholic fatty liver disease	K00236					PF01127	Sdh_cyt	Succinate dehydrogenase/Fumarate reductase transmembrane subunit	IPR034804,IPR018495,IPR014314,IPR000701	Homologous_superfamily|Conserved_site|Family|Family
A0A6P3E4P6	JEQ12_001136	Transcriptional adapter 1	37.3746	A0A6P3E4P6;W5PQI8	JEQ12_001136;TADA1	Transcriptional adapter 1	1.78701e-10	43.8722		-1.63994	-1.18505	-1.01244	-1.07721	-0.970853	-1.60448	-1.29717	-3.48679	-1.58068	-2.45338	-2.52624	-2.12539	-1.55728	-2.49645	-2.24435	-1.78373	-1.6387				-1.7654	-2.12792	-2.39673	Transcriptional adapter 1	101113550	JEQ12_001136	GO:0005634,GO:0070461	nucleus|SAGA-type complex								PF12767	SAGA-Tad1	Transcriptional regulator of RNA polII, SAGA, subunit	IPR024738	Family
A0A6P3E4P7	JEQ12_015478	Nicotinamide phosphoribosyltransferase	55.4149	A0A6P3E4P7;W5P316	JEQ12_015478;NAMPT	Nicotinamide phosphoribosyltransferase	7.86717e-19	47.4528	0.471269	0.530913	0.3228	0.536358	0.552342	0.588405	0.75408	0.673001	0.240692	0.413478	0.21003	1.09685	0.117635	0.455385	0.463813	0.68813	0.613133	0.358189	0.324983	0.571127	0.492851	0.269181	0.372904	0.449606	Nicotinamide phosphoribosyltransferase	780506	JEQ12_015478	GO:0032922,GO:0009435,GO:0005737,GO:0005615,GO:0005634,GO:0005125,GO:0047280	circadian regulation of gene expression|NAD biosynthetic process|cytoplasm|extracellular space|nucleus|cytokine activity|nicotinamide phosphoribosyltransferase activity	oas00760,oas04621	Nicotinate and nicotinamide metabolism|NOD-like receptor signaling pathway	K03462					PF18127,PF04095	NAMPT_N|NAPRTase	Nicotinamide phosphoribosyltransferase, N-terminal domain|Nicotinate phosphoribosyltransferase (NAPRTase) family	IPR013785,IPR041529,IPR041525,IPR016471,IPR036068	Homologous_superfamily|Domain|Domain|Family|Homologous_superfamily
A0A6P3E4Q0	JEQ12_001147	Uncharacterized protein	29.2303	A0A6P3E4Q0;W5PRK1	JEQ12_001147;MPZL1	Uncharacterized protein;Myelin protein zero like 1	4.19155e-27	50.4238	0.621208	0.948992	0.790194	0.53519	0.402927	0.903468	0.845968	0.61656	0.717902	0.856059	0.740218	0.548392	0.252398	0.464398	0.645343	0.30679	0.863132	0.556359	0.481129	0.862606	0.75464	0.586198	0.345401	0.676634	Uncharacterized protein	101115590	JEQ12_001147	GO:0016020	membrane	oas04514	Cell adhesion molecules	K06770					PF07686	V-set	Immunoglobulin V-set domain	IPR007110,IPR036179,IPR013783,IPR003599,IPR013106,IPR000920	Domain|Homologous_superfamily|Homologous_superfamily|Domain|Domain|Family
A0A6P3E4Q7	JEQ12_001230	T-complex protein 1 subunit theta	59.6095	A0A6P3E4Q7;W5PYM5	JEQ12_001230;CCT8	T-complex protein 1 subunit theta	1.56752e-29	51.2355	4.54151	4.52778	4.64733	4.63586	4.62484	4.73331	4.62092	4.65012	4.5092	4.55855	4.52831	4.59243	4.68941	4.65801	4.59072	4.59802	4.70047	4.57318	4.69614	4.65461	4.7026	4.70738	4.66097	4.66741	T-complex protein 1 subunit theta	101108792	JEQ12_001230	GO:0005832,GO:0005929,GO:0005524,GO:0016887,GO:0140662,GO:0051082	chaperonin-containing T-complex|cilium|ATP binding|ATP hydrolysis activity|ATP-dependent protein folding chaperone|unfolded protein binding								PF00118	Cpn60_TCP1	TCP-1/cpn60 chaperonin family	IPR012721,IPR017998,IPR002194,IPR002423,IPR027409,IPR027413,IPR027410	Family|Family|Conserved_site|Family|Homologous_superfamily|Homologous_superfamily|Homologous_superfamily
A0A6P3E4R8	JEQ12_001256	Uncharacterized protein	122.153	A0A6P3E4R8	JEQ12_001256	Uncharacterized protein	3.60826e-29	51.1152	-1.15817	-1.23932	-1.1263	-1.34906	-1.45731	-1.09331	-1.47082	-1.59245	-1.75908	-1.66744	-1.43057	-1.21663	-1.23786	-1.20781	-1.27979	-1.31615	-1.25482	-1.53543	-1.2518	-0.962635	-1.77428	-1.4431	-1.40324	-1.49959	Uncharacterized protein	101116878	JEQ12_001256	GO:0016579,GO:0006511,GO:0004843	protein deubiquitination|ubiquitin-dependent protein catabolic process|cysteine-type deubiquitinase activity	oas04657	IL-17 signaling pathway	K11849					PF00443,PF02809	UCH|UIM	Ubiquitin carboxyl-terminal hydrolase|Ubiquitin interaction motif	IPR038765,IPR001394,IPR009060,IPR003903,IPR018200,IPR028889	Homologous_superfamily|Domain|Homologous_superfamily|Conserved_site|Conserved_site|Domain
A0A6P3E4S0	JEQ12_016814	Peptidase M23 domain-containing protein	16.4332	A0A6P3E4S0;W5PZT3	JEQ12_016814;LECT2	Peptidase M23 domain-containing protein;Leukocyte cell derived chemotaxin 2	1.48488e-23	49.2017	-1.15367	-0.331001	-1.08583	-1.04188	-1.20033	-0.616051	-1.39889	-0.957274	-0.890009	-1.19199	-0.375893	-0.735187	-1.6126	-0.375554	-0.622044	-0.77836	-1.17919	-0.899201	-0.944995	-0.80608	-1.49956	-0.937993	-1.11012	-0.689585	Peptidase M23 domain-containing protein	101105747	JEQ12_016814	GO:0046872	metal ion binding								PF01551	Peptidase_M23	Peptidase family M23	IPR011055,IPR008663,IPR017381,IPR016047	Homologous_superfamily|Family|Family|Domain
A0A6P3E4S1	JEQ12_001261	Heat shock 70 kDa protein 13	51.8174	A0A6P3E4S1;W5Q411	JEQ12_001261;HSPA13	Heat shock 70 kDa protein 13	0.000780461	36.4907	0.141253	-0.735367	-0.0239626	-0.15137	-0.577827	-0.395617	-0.335716	0.162987	-0.348483	-0.54077	-0.545242	-0.108207	-0.357988	0.0266504	-0.464601	-0.28398	0.248949	-0.669908	-0.400477	-0.414623	-0.480708	-0.860765	-0.410352	-0.317983	Heat shock 70 kDa protein 13	101118151	JEQ12_001261	GO:0005783,GO:0005524,GO:0140662	endoplasmic reticulum|ATP binding|ATP-dependent protein folding chaperone								PF00012	HSP70	Hsp70 protein	IPR043129,IPR018181,IPR013126,IPR042048	Homologous_superfamily|Conserved_site|Family|Family
A0A6P3E4S3	JEQ12_016826	Kinesin-like protein	100.101	A0A6P3E4S3;W5Q2V6	JEQ12_016826;KIF20A	Kinesin-like protein	1.44774e-05	40.8796	-2.54352	-3.21381	-2.15358	-3.26724	-2.69282	-1.79062	-2.34104	-3.93479	-0.897341	-2.35637	-1.686	-2.47298	-2.47722	-2.8106	-1.83639	-2.84441	-2.85952	-2.52002	-2.91785	-1.41576	-3.22735	-1.09739	-2.80066	-2.90176	Kinesin-like protein	101109352	JEQ12_016826	GO:0007018,GO:0005874,GO:0005524,GO:0008017,GO:0003777	microtubule-based movement|microtubule|ATP binding|microtubule binding|microtubule motor activity	oas04814	Motor proteins	K10402					PF00225	Kinesin	Kinesin motor domain	IPR019821,IPR001752,IPR036961,IPR027417	Conserved_site|Domain|Homologous_superfamily|Homologous_superfamily
A0A6P3E4S6	JEQ12_016836	Stress-70 protein, mitochondrial	73.7076	A0A6P3E4S6;W5Q4W8	JEQ12_016836;HSPA9	Stress-70 protein, mitochondrial;Stress-70 protein, mitochondrial	1.73914e-31	51.8774	4.61844	4.53484	4.65468	4.68582	4.71595	4.71265	4.55514	4.57951	4.67759	4.63866	4.70596	4.64538	4.71291	4.69423	4.72676	4.77365	4.61744	4.59876	4.67533	4.64374	4.70338	4.76644	4.73792	4.72847	Stress-70 protein, mitochondrial	101112054	JEQ12_016836	GO:0005524,GO:0140662,GO:0051082	ATP binding|ATP-dependent protein folding chaperone|unfolded protein binding	oas03018,oas05152	RNA degradation|Tuberculosis	K04043					PF00012	HSP70	Hsp70 protein	IPR043129,IPR012725,IPR018181,IPR029048,IPR029047,IPR013126	Homologous_superfamily|Family|Conserved_site|Homologous_superfamily|Homologous_superfamily|Family
A0A6P3E4T7	JEQ12_016869	WD repeat-containing protein 55	41.994	A0A6P3E4T7	JEQ12_016869	WD repeat-containing protein 55	2.34115e-15	46.0015	-1.5037	-1.24434	-0.941042	-1.57335	-1.07237	-1.37199	-1.1572	-0.976148	-1.70452	-1.00836	-1.29691	-1.69319	-1.72699	-1.22774	-1.6254	-1.45632	-1.66143	-1.28943	-2.22779	-1.54845	-1.55381	-1.24231	-1.17056	-1.68388	WD repeat-containing protein 55	101119983	JEQ12_016869	GO:0006364,GO:0005730	rRNA processing|nucleolus								PF12894,PF00400	ANAPC4_WD40|WD40	Anaphase-promoting complex subunit 4 WD40 domain|WD domain, G-beta repeat	IPR024977,IPR015943,IPR001680,IPR019775,IPR036322,IPR017422	Domain|Homologous_superfamily|Repeat|Conserved_site|Homologous_superfamily|Family
A0A6P3E4U5	NT5C3A	5'-nucleotidase	33.9261	A0A6P3E4U5	NT5C3A	5'-nucleotidase	2.97385e-26	50.1354	0.873793	1.20295	1.16735	1.1776	1.0781	0.830147	1.24403	1.27425	1.23829	1.20138	1.28006	1.14248	1.17561	0.928503	1.28494	1.29128	1.07764	1.18394	1.28701	1.16324	1.33404	1.2425	1.11068	1.25911	5'-nucleotidase	101119900	NT5C3A	GO:0009117,GO:0005737,GO:0000287,GO:0000166,GO:0106411	nucleotide metabolic process|cytoplasm|magnesium ion binding|nucleotide binding|XMP 5'-nucleosidase activity	oas00240	Pyrimidine metabolism	K24242					PF05822	UMPH-1	Pyrimidine 5'-nucleotidase (UMPH-1)	IPR036412,IPR023214,IPR006434	Homologous_superfamily|Homologous_superfamily|Family
A0A6P3E4V3	JEQ12_001354	Uncharacterized protein	34.1077	A0A6P3E4V3;W5QD48	JEQ12_001354;LOC101119354	Uncharacterized protein;Transgelin-3	5.67139e-34	52.6724	1.38652	0.924461	0.998603	0.976848	1.03657	1.10136	0.953489	1.0036	1.43224	1.20166	0.839776	0.982731	1.3253	0.350207	1.0787	0.688395	0.94645	0.971166	1.15659	0.878007	1.23325	0.987546	1.28309	1.20657	Uncharacterized protein	121815999	JEQ12_001354										PF00561	Abhydrolase_1	alpha/beta hydrolase fold	IPR029058,IPR000073	Homologous_superfamily|Domain
A0A6P3E4V5	JEQ12_016921	Uncharacterized protein	78.7218	A0A6P3E4V5;W5NWD4	JEQ12_016921;SH3RF2	Uncharacterized protein;SH3 domain containing ring finger 2	7.09602e-06	41.2803	-2.28148	-1.81817	-2.10611	-2.013	-2.13625	-1.48985	-1.71736	-2.81288	-2.74819	-2.11764	-1.75765	-2.58546	-2.26587	-2.0569	-1.94749	-2.36399	-0.634334	-1.99263	-1.94998	-2.75912	-2.27696	-2.31633	-1.73335	-2.0861	Uncharacterized protein	101111630	JEQ12_016921	GO:0009966,GO:0046872	regulation of signal transduction|metal ion binding								PF00018,PF07653,PF14604,PF13639	SH3_1|SH3_2|SH3_9|zf-RING_2	SH3 domain|Variant SH3 domain|Variant SH3 domain|Ring finger domain	IPR036028,IPR001452,IPR035792,IPR035794,IPR035822,IPR001841,IPR013083,IPR017907	Homologous_superfamily|Domain|Domain|Domain|Domain|Domain|Homologous_superfamily|Conserved_site
A0A6P3E4W5	ZNF691	Zinc finger protein 691	31.894	A0A6P3E4W5	ZNF691	Zinc finger protein 691	1.68326e-06	41.8708	-1.83509	-1.94361	-1.8915	-2.57371	-1.97409	-1.40686	-2.86068	-1.42365	-1.45572	-1.7512	-1.63671	-1.55311	-1.79132	-1.79443	-1.5688	-2.99912	-2.82515	-1.89944	-2.42709	-1.68118	-1.85375	-1.58434	-2.09321	-1.86746	Zinc finger protein 691	101106807	ZNF691						KOG1721	B	DNA binding	Chromatin structure and dynamics	PF00096,PF13465	zf-C2H2|zf-H2C2_2	Zinc finger, C2H2 type|Zinc-finger double domain	IPR036236,IPR013087	Homologous_superfamily|Domain
A0A6P3E4Y4	FAM114A2	Family with sequence similarity 114 member A2	54.8606	A0A6P3E4Y4;A0A6P3TP31	FAM114A2;JEQ12_016999	Family with sequence similarity 114 member A2;Protein FAM114A2	2.95223e-39	54.2843	0.578077	0.84844	0.485242	0.62087	0.518131	0.620392	0.468829	0.399031	0.421303	0.545971	0.593417	0.485309	0.382143	0.480668	0.790682	0.507627	0.498852	0.52467	0.367102	0.34476	0.406588	0.573247	0.589706	0.737387	Family with sequence similarity 114 member A2	101109013	FAM114A2						ENOG502QS74	S	Protein of unknown function (DUF719)	Function unknown	PF05334	DUF719	Protein of unknown function (DUF719)	IPR007998	Family
A0A6P3E4Y6	JEQ12_017011	Uncharacterized protein	14.7398	A0A6P3E4Y6;W5PLQ1	JEQ12_017011;LOC101111190	Uncharacterized protein;Hepatitis A virus cellular receptor 1-like	1.80753e-09	43.4744	-0.514578	0.274438	-0.407897	0.190787	-1.04002	0.123054	-0.101167	0.398157	-1.02987	0.0714456	-0.100005	0.308442	0.00687425	0.214076	0.452513	-0.0330608	0.127747	0.157749	0.47551	-0.472347	-0.161598	0.0205992	0.854749	0.407681	Uncharacterized protein	101111190	JEQ12_017011			oas03264	Virion - Flavivirus	K20413					PF07686	V-set	Immunoglobulin V-set domain	IPR007110,IPR036179,IPR013783,IPR003599,IPR013106	Domain|Homologous_superfamily|Homologous_superfamily|Domain|Domain
A0A6P3E4Y9	JEQ12_001438	Oxysterol-binding protein	84.4452	A0A6P3E4Y9;W5QG92	JEQ12_001438;OSBPL11	Oxysterol-binding protein	1.48229e-39	54.3723	-1.41189	-0.618038	-1.55093	-1.48804	-1.4835	-1.48145	-1.60403	-1.05868	-1.18618	-1.20662	-1.01047	-1.17087	-1.38866	-1.26745	-1.23549	-1.23847	-1.27608	-1.04825	-1.65668	-1.33281	-1.04181	-1.42089	-1.37712	-1.27048	Oxysterol-binding protein	101117718	JEQ12_001438	GO:0006869,GO:0008289	lipid transport|lipid binding								PF01237,PF00169	Oxysterol_BP|PH	Oxysterol-binding protein |PH domain	IPR037239,IPR000648,IPR018494,IPR011993,IPR001849	Homologous_superfamily|Family|Conserved_site|Homologous_superfamily|Domain
A0A6P3E4Z3	CMPK1	UMP-CMP kinase	26.0841	A0A6P3E4Z3;W5P075	CMPK1	UMP-CMP kinase	9.65181e-22	48.5518	1.8618	1.92332	1.63487	1.91568	1.89411	2.2042	1.91135	2.22225	1.8088	2.12978	2.11049	2.15593	2.15617	1.93786	2.06206	1.92344	1.98693	2.07449	2.10445	1.77134	1.94711	2.07228	2.18325	2.22257	UMP-CMP kinase	101106892	CMPK1	GO:0006207,GO:0016310,GO:0006221,GO:0005737,GO:0005634,GO:0005524,GO:0004127,GO:0004550,GO:0009041	'de novo' pyrimidine nucleobase biosynthetic process|phosphorylation|pyrimidine nucleotide biosynthetic process|cytoplasm|nucleus|ATP binding|cytidylate kinase activity|nucleoside diphosphate kinase activity|uridylate kinase activity	oas00240,oas00983	Pyrimidine metabolism|Drug metabolism - other enzymes	K13800					PF00406	ADK	Adenylate kinase	IPR000850,IPR033690,IPR027417,IPR006266	Family|Conserved_site|Homologous_superfamily|Family
A0A6P3E4Z4	TFRC	Transferrin receptor protein 1	85.7424	A0A6P3E4Z4	TFRC	Transferrin receptor protein 1	4.24637e-21	48.3161	1.45474	1.62926	1.50705	1.41346	1.47569	1.36428	1.3862	1.68193	1.30993	1.50665	1.28454	1.46267	1.29656	1.25874	1.74362	1.49492	1.25659	1.4032	1.44399	1.61068	1.46757	1.43542	1.42925	1.45377	Transferrin receptor protein 1	100885768	TFRC	GO:0006879,GO:0031623,GO:0033572,GO:0042470,GO:0005886,GO:0004998	intracellular iron ion homeostasis|receptor internalization|transferrin transport|melanosome|plasma membrane|transferrin receptor activity	oas04066,oas04144,oas04145,oas04216,oas04640	HIF-1 signaling pathway|Endocytosis|Phagosome|Ferroptosis|Hematopoietic cell lineage	K06503	KOG2195	L	exopeptidase activity	Replication, recombination and repair	PF02225,PF04389,PF04253	PA|Peptidase_M28|TFR_dimer	PA domain|Peptidase family M28|Transferrin receptor-like dimerisation domain	IPR046450,IPR003137,IPR007484,IPR039373,IPR007365,IPR036757,IPR037324	Homologous_superfamily|Domain|Domain|Family|Domain|Homologous_superfamily|Domain
A0A6P3E4Z7	CDKN2C	Cyclin dependent kinase inhibitor 2C	18.3257	A0A6P3E4Z7	CDKN2C	Cyclin dependent kinase inhibitor 2C	9.28643e-21	48.1905	0.520518	0.641482	0.624358	0.865968	0.638175	0.815199	0.703267	1.07243	0.647989	0.804553	0.854584	0.957811	1.0372	1.02638	0.633272	0.439344	0.695299	0.88444	0.845986	0.766397	0.0547433	1.01521	1.27649	1.01673	Cyclin dependent kinase inhibitor 2C	101109224	CDKN2C			oas04110,oas05202,oas05166,oas04934,oas01522	Cell cycle|Transcriptional misregulation in cancer|Human T-cell leukemia virus 1 infection|Cushing syndrome|Endocrine resistance	K06622	KOG0504	I	protein ubiquitination	Lipid transport and metabolism	PF13637	Ank_4	Ankyrin repeats (many copies)	IPR002110,IPR036770	Repeat|Homologous_superfamily
A0A6P3E4Z8	JEQ12_001453	Anaphase-promoting complex subunit 4 WD40 domain-containing protein	39.3317	A0A6P3E4Z8;W5QGK1	JEQ12_001453;WDR53	Anaphase-promoting complex subunit 4 WD40 domain-containing protein;WD repeat domain 53	0.000380624	37.8308				-3.06359		-3.25181		-3.22775	-2.8024	-3.04785	-3.97037	-4.04322	-4.04746	-4.51191	-4.51542	-3.37734					-3.32138	-3.22605	-4.00819	-4.4157	Anaphase-promoting complex subunit 4 WD40 domain-containing protein	101122487	JEQ12_001453										PF12894,PF00400	ANAPC4_WD40|WD40	Anaphase-promoting complex subunit 4 WD40 domain|WD domain, G-beta repeat	IPR024977,IPR015943,IPR001680,IPR019775,IPR036322,IPR042453	Domain|Homologous_superfamily|Repeat|Conserved_site|Homologous_superfamily|Family
A0A6P3E4Z9	JEQ12_017038	Cytosolic fatty-acid binding proteins domain-containing protein	14.3411	A0A6P3E4Z9;W5PUU1	JEQ12_017038;FABP6	Cytosolic fatty-acid binding proteins domain-containing protein;Fatty acid binding protein 6	0.000551929	37.2029	-1.65432	-0.335775					-1.61028	-1.15978	-1.57971	-0.934658	-1.17205	-0.604359	-2.68484	-0.518797	-1.69944	-0.896792	-1.05831	-1.26738	-1.26039	-1.87247	-1.55962	-1.33824	-1.36084	-1.46703	Cytosolic fatty-acid binding proteins domain-containing protein	101116051	JEQ12_017038	GO:0005737,GO:0008289	cytoplasm|lipid binding	oas03320	PPAR signaling pathway	K08755					PF14651	Lipocalin_7	Lipocalin / cytosolic fatty-acid binding protein family	IPR012674,IPR000463,IPR031259	Homologous_superfamily|Domain|Family
A0A6P3E512	JEQ12_001512	Cystatin fetuin-B-type domain-containing protein	42.5905	A0A6P3E512;W5QH54	JEQ12_001512;FETUB	Cystatin fetuin-B-type domain-containing protein;Fetuin B	1.11702e-30	51.613	5.65334	4.60235	4.68525	3.64139	4.43045	4.11449	3.83365	4.97406	4.12952	4.48178	4.92412	5.01725	4.65309	3.98012	4.91298	3.74697	5.22777	4.43595	4.36821	5.39104	3.44261	4.58804	3.21193	4.40339	Cystatin fetuin-B-type domain-containing protein	101113641	JEQ12_001512	GO:0005615,GO:0004869	extracellular space|cysteine-type endopeptidase inhibitor activity								PF00031	Cystatin	Cystatin domain	IPR000010,IPR025764,IPR046350,IPR001363	Domain|Domain|Homologous_superfamily|Conserved_site
A0A6P3E513	JEQ12_017083	Cyclin-H	37.4792	A0A6P3E513;W5Q318	JEQ12_017083;CCNH	Cyclin-H	2.9793e-22	48.7367	-0.44043	-0.658827	-0.254225	-0.624768	-0.576136	-0.663684	-0.607119	-0.467114	-0.273984	-0.234676	-0.415035	-0.48548	-0.597229	-0.550195	-0.308402	-0.569632	-0.578581	-0.293451	-0.533268	-0.777696	-0.115013	-0.494093	-0.447098	-0.650463	Cyclin-H	101104905	JEQ12_017083	GO:0006351,GO:0006357,GO:0070985,GO:0016538	DNA-templated transcription|regulation of transcription by RNA polymerase II|transcription factor TFIIK complex|cyclin-dependent protein serine/threonine kinase regulator activity	oas03022,oas03420,oas04110	Basal transcription factors|Nucleotide excision repair|Cell cycle	K06634					PF16899,PF00134	Cyclin_C_2|Cyclin_N	Cyclin C-terminal domain|Cyclin, N-terminal domain	IPR013763,IPR036915,IPR043198,IPR031658,IPR006671,IPR027081	Domain|Homologous_superfamily|Family|Domain|Domain|Family
A0A6P3E515	JEQ12_001519	RRM domain-containing protein	65.8952	A0A6P3E515;W5QH89	JEQ12_001519;IGF2BP2	RRM domain-containing protein;Insulin like growth factor 2 mRNA binding protein 2	4.14589e-20	47.9466	-0.352534	0.165017	0.0894569	-0.351302	-0.321488	-0.887892	-0.699869	-0.100122	-0.18481	-0.581669	-0.238866	-0.841977	-0.292828	-0.7595	0.0333018	-0.638012	-0.768735	-0.377138	-1.12828	-0.529792	-0.422008	-0.453118	-0.540556	-0.397016	RRM domain-containing protein	101115925	JEQ12_001519	GO:0051028,GO:0006417,GO:0010494,GO:0000932,GO:0003723	mRNA transport|regulation of translation|cytoplasmic stress granule|P-body|RNA binding								PF00013,PF00076	KH_1|RRM_1	KH domain|RNA recognition motif. (a.k.a. RRM, RBD, or RNP domain)	IPR034843,IPR004087,IPR004088,IPR036612,IPR012677,IPR035979,IPR000504	Domain|Domain|Domain|Homologous_superfamily|Homologous_superfamily|Homologous_superfamily|Domain
A0A6P3E516	JEQ12_015637	Uncharacterized protein	40.2501	A0A6P3E516;W5Q1R7	JEQ12_015637;NUDCD3	Uncharacterized protein;NudC domain containing 3	9.93073e-14	45.2531	0.763907	0.504883	0.622882	0.634433	0.980441	0.750094	0.901866	0.62834	0.663177	0.49807	0.741494	0.685875	0.677427	0.760537	0.799977	0.756766	0.85523	0.56798	0.612674	0.461311	0.839432	1.00741	0.638461	0.750003	Uncharacterized protein	101116647	JEQ12_015637										PF04969,PF14050	CS|Nudc_N	CS domain|N-terminal conserved domain of Nudc.	IPR007052,IPR008978,IPR037898,IPR025934,IPR037905	Domain|Homologous_superfamily|Family|Domain|Domain
A0A6P3E524	JEQ12_001545	ABC transporter domain-containing protein	79.8118	A0A6P3E524;W5QHF0	JEQ12_001545;ABCF3	ABC transporter domain-containing protein;ATP binding cassette subfamily F member 3	3.10033e-16	46.3858	0.257521	0.320521	0.573643	0.543101	0.38666	0.698777	0.319825	0.482485	0.349006	0.502012	0.19541	0.541777	0.367757	0.455451	0.319224	0.355948	0.391728	0.449535	0.0229527	0.485946	0.330287	0.519657	0.316586	0.54018	ABC transporter domain-containing protein	101121904	JEQ12_001545	GO:0005524,GO:0016887	ATP binding|ATP hydrolysis activity								PF00005,PF12848	ABC_tran|ABC_tran_Xtn	ABC transporter|ABC transporter	IPR003593,IPR032781,IPR003439,IPR017871,IPR027417	Domain|Domain|Domain|Conserved_site|Homologous_superfamily
A0A6P3E534	JEQ12_001577	Uncharacterized protein	37.5812	A0A6P3E534;W5QHP5	JEQ12_001577;GNB4	Uncharacterized protein;G protein subunit beta 4	1.12342e-26	50.2795	2.84248	2.88178	2.91136	2.95561	2.94269	3.07648	2.73983	3.01333	3.05001	3.23089	3.05429	3.03017	2.98747	2.86656	2.97219	2.798	2.87048	3.02411	3.22114	2.97393	2.94735	3.2592	2.78631	3.1305	Uncharacterized protein	101108976	JEQ12_001577	GO:0007165	signal transduction	oas04014,oas04371,oas04151,oas04062,oas04926,oas04724,oas04727,oas04725,oas04728,oas04726,oas04723,oas04713,oas05200,oas05170,oas05163,oas05167,oas05032,oas05034	Ras signaling pathway|Apelin signaling pathway|PI3K-Akt signaling pathway|Chemokine signaling pathway|Relaxin signaling pathway|Glutamatergic synapse|GABAergic synapse|Cholinergic synapse|Dopaminergic synapse|Serotonergic synapse|Retrograde endocannabinoid signaling|Circadian entrainment|Pathways in cancer|Human immunodeficiency virus 1 infection|Human cytomegalovirus infection|Kaposi sarcoma-ass…	K04538					PF00400	WD40	WD domain, G-beta repeat	IPR020472,IPR001632,IPR016346,IPR015943,IPR001680,IPR019775,IPR036322	Repeat|Domain|Family|Homologous_superfamily|Repeat|Conserved_site|Homologous_superfamily
A0A6P3E538	JEQ12_001594	Alpha/beta hydrolase fold-3 domain-containing protein	46.0499	A0A6P3E538;W5QHT6	JEQ12_001594;NCEH1	Alpha/beta hydrolase fold-3 domain-containing protein;Neutral cholesterol ester hydrolase 1	9.40756e-26	49.9644	-0.9985	-0.280446	-0.80965	-1.12868	-0.884505	-1.00377	-0.82782	-0.850224	-0.995942	-0.723282	-0.590252	-0.652736	-1.37668	-0.60162	-1.00339	-1.0841	-0.865208	-0.819012	-1.40556	-1.48888	-1.82429	-1.11401	-1.16559	-1.07818	Alpha/beta hydrolase fold-3 domain-containing protein	101113553	JEQ12_001594	GO:0016020,GO:0052689	membrane|carboxylic ester hydrolase activity	oas04927,oas04976,oas04979,oas04934	Cortisol synthesis and secretion|Bile secretion|Cholesterol metabolism|Cushing syndrome	K14349					PF07859	Abhydrolase_3	alpha/beta hydrolase fold	IPR029058,IPR013094,IPR017157,IPR033140	Homologous_superfamily|Domain|Family|Active_site
A0A6P3E551	JEQ12_015687	Uncharacterized protein	87.3774	A0A6P3E551;W5NUQ8	JEQ12_015687;GCC1	Uncharacterized protein;GRIP and coiled-coil domain containing 1	4.89148e-10	43.7022	-1.1634	-1.04711	-0.23248	-1.39196	-1.23182	-0.529669	-0.861095	-1.00531	-0.658619	-0.91565	-1.27875	-0.937375	-0.730856	-0.473833	-0.980511	-1.13156	-0.765061	-1.07457	-0.725054	-0.644349	-0.953495	-0.896204	-0.772319	-0.693697	Uncharacterized protein	101109438	JEQ12_015687										PF01465	GRIP	GRIP domain	IPR000237	Domain
A0A6P3E560	JEQ12_017149	Small-subunit processome Utp21 domain-containing protein	98.9846	A0A6P3E560;W5QCC6	JEQ12_017149;WDR36	Small-subunit processome Utp21 domain-containing protein;WD repeat domain 36	1.16604e-27	50.6117	-0.286214	-0.530334	-0.316049	-0.511506	-0.399579	-0.379051	-0.22813	-0.265879	-0.483015	-0.125613	-0.344281	-0.610593	-0.290556	-0.159387	-0.368936	-0.112754	-0.317436	-0.382483	-0.398051	-0.457077	-0.288138	-0.203407	-0.0615792	-0.23348	Small-subunit processome Utp21 domain-containing protein	101107787	JEQ12_017149	GO:0006364,GO:0032040	rRNA processing|small-subunit processome	oas03008	Ribosome biogenesis in eukaryotes	K14554					PF04192,PF00400	Utp21|WD40	Utp21 specific WD40 associated putative domain |WD domain, G-beta repeat	IPR011047,IPR007319,IPR015943,IPR001680,IPR019775,IPR036322	Homologous_superfamily|Domain|Homologous_superfamily|Repeat|Conserved_site|Homologous_superfamily
A0A6P3E573	JEQ12_015724	Uncharacterized protein	84.7718	A0A6P3E573;W5P7L3	JEQ12_015724;MKLN1	Uncharacterized protein;Muskelin 1	0.00260722	31.3366		-1.51308	-1.01315	0.0696123	-1.65681	-1.02935	-0.856674	-1.81269	-0.29877	-2.71842	-1.76106	-1.69278	-1.25308	-1.16421	-1.02602	-0.0255705					-1.34354	-1.49908	-0.987099	-1.31975	Uncharacterized protein	101119131	JEQ12_015724										PF01344,PF13415,PF06588	Kelch_1|Kelch_3|Muskelin_N	Kelch motif|Galactose oxidase, central domain|Muskelin N-terminus	IPR006595,IPR011043,IPR008979,IPR015915,IPR006652,IPR006594,IPR010565	Domain|Homologous_superfamily|Homologous_superfamily|Homologous_superfamily|Repeat|Domain|Domain
A0A6P3E577	GAR1	H/ACA ribonucleoprotein complex subunit	22.0186	A0A6P3E577	GAR1	H/ACA ribonucleoprotein complex subunit	7.94073e-14	45.2986	3.20415	2.67136	2.92912	3.14996	3.36458	3.16133	3.12044	3.06221	3.18248	2.38765	2.54401	3.16584	3.31111	2.94463	2.76764	2.68939	2.74714	2.6384	3.26565	3.21379	3.10317	2.96641	2.7613	2.75812	H/ACA ribonucleoprotein complex subunit	101119047	GAR1	GO:0001522,GO:0006364,GO:0005730,GO:1990904,GO:0003723	pseudouridine synthesis|rRNA processing|nucleolus|ribonucleoprotein complex|RNA binding	oas03008	Ribosome biogenesis in eukaryotes	K11128	KOG3262	J	box H/ACA snoRNA binding	Translation, ribosomal structure and biogenesis	PF04410	Gar1	Gar1/Naf1 RNA binding region	IPR038664,IPR007504,IPR009000	Homologous_superfamily|Family|Homologous_superfamily
A0A6P3E5A1	JEQ12_001813	Ubiquitin-like modifier-activating enzyme 5	44.7058	A0A6P3E5A1;W5PGE3	JEQ12_001813;UBA5	Ubiquitin-like modifier-activating enzyme 5	1.8152e-27	50.5468	0.321472	0.176024	0.417245	0.0995141	0.345901	0.410166	0.467188	0.300178	0.428337	0.61401	0.358602	0.530635	0.397818	0.382736	0.189616	0.227488	0.20313	0.42547	0.29581	0.277526	0.498325	0.231495	0.222735	0.36583	Ubiquitin-like modifier-activating enzyme 5	101118656	JEQ12_001813	GO:0005789,GO:0005794,GO:0046872,GO:0008641	endoplasmic reticulum membrane|Golgi apparatus|metal ion binding|ubiquitin-like modifier activating enzyme activity								PF00899	ThiF	ThiF family	IPR029752,IPR045886,IPR000594,IPR035985	Conserved_site|Family|Domain|Homologous_superfamily
A0A6P3E5A6	JEQ12_001815	Uncharacterized protein	48.3499	A0A6P3E5A6;W5PH63	JEQ12_001815;ACP3	Uncharacterized protein;Acid phosphatase 3	6.37416e-14	45.3434	-0.626471	0.0613204	-0.342996	-0.674845	-0.201596	-0.48187	-0.12182	-0.267427	-0.00966975	0.127077	0.131722	-0.0612279	-0.270339	0.162676	-0.171636	0.165287	-0.746102	0.166974	-0.590734	-0.956661	0.186064	-0.130492	0.297848	-0.031469	Uncharacterized protein	101120130	JEQ12_001815										PF00328	His_Phos_2	Histidine phosphatase superfamily (branch 2)	IPR033379,IPR000560,IPR029033	Active_site|Family|Homologous_superfamily
A0A6P3E5A7	JEQ12_000507	dimethylargininase	31.2628	A0A6P3E5A7	JEQ12_000507	dimethylargininase	7.08867e-34	52.6419	1.37184	1.14388	1.09482	1.35126	0.926305	1.52722	0.972872	1.23319	1.1562	1.21035	1.1577	1.18503	1.14267	1.33047	1.51635	1.38617	1.02549	1.31839	1.3977	0.947765	1.43878	1.63667	0.872331	1.42549	dimethylargininase	101113635	JEQ12_000507	GO:0016403,GO:0046872	dimethylargininase activity|metal ion binding								PF19420	DDAH_eukar	N,N dimethylarginine dimethylhydrolase, eukaryotic	IPR033199	Family
A0A6P3E5B6	JEQ12_000519	Uncharacterized protein	41.8493	A0A6P3E5B6;W5PZV5	JEQ12_000519;HS2ST1	Uncharacterized protein;Heparan sulfate 2-O-sulfotransferase 1	1.70261e-14	45.6106	-0.0845072	0.109195	0.149288	-0.172679	-0.00619608	-0.227156	-0.236598	0.0955316	0.28558	0.296187	0.255195	0.0769254	0.155832	0.172335	0.199176	0.37266	0.262512	0.161096	0.0838207	0.180723	0.0998364	-0.158474	-0.123924	0.326941	Uncharacterized protein	101117803	JEQ12_000519	GO:0000139,GO:0008146	Golgi membrane|sulfotransferase activity	oas00534	Glycosaminoglycan biosynthesis - heparan sulfate / heparin	K02513					PF03567	Sulfotransfer_2	Sulfotransferase family	IPR007734,IPR027417,IPR005331	Family|Homologous_superfamily|Family
A0A6P3E5C4	JEQ12_017278	Uncharacterized protein	23.381	A0A6P3E5C4;W5Q8D8	JEQ12_017278;HPGDS	Uncharacterized protein;Hematopoietic prostaglandin D synthase	1.39172e-21	48.494	0.172095	0.641581	0.133907	0.496819	-0.391542	0.243545	0.218528	0.437046	0.0338501	0.421179	0.0642475	-0.0940351	-0.839016	0.00317327	-0.0589203	-0.469791	-0.0190549	0.0311088	-0.966581	0.530761	-0.554281	0.221303	-0.954489	-0.0707453	Uncharacterized protein	101116145	JEQ12_017278			oas00590,oas00480,oas00980,oas00982,oas05204	Arachidonic acid metabolism|Glutathione metabolism|Metabolism of xenobiotics by cytochrome P450|Drug metabolism - cytochrome P450|Chemical carcinogenesis - DNA adducts	K04097					PF14497,PF02798	GST_C_3|GST_N	Glutathione S-transferase, C-terminal domain|Glutathione S-transferase, N-terminal domain	IPR010987,IPR036282,IPR004045,IPR004046,IPR036249	Domain|Homologous_superfamily|Domain|Domain|Homologous_superfamily
A0A6P3E5C6	JEQ12_001932	Carbonyl reductase (NADPH)	30.5939	A0A6P3E5C6	JEQ12_001932	Carbonyl reductase (NADPH)	3.15215e-22	48.728	1.79182	1.95992	1.96285	1.84402	1.74265	2.25055	1.97906	1.88032	1.52826	1.895	2.00975	2.20541	1.88541	2.4272	2.14588	1.64704	1.39317	1.67532	2.05317	1.54175	1.81991	1.56339	1.66232	1.8883	Carbonyl reductase (NADPH)	101114408	JEQ12_001932	GO:0005737,GO:0004090	cytoplasm|carbonyl reductase (NADPH) activity	oas00590,oas00790,oas00980,oas05204,oas05208	Arachidonic acid metabolism|Folate biosynthesis|Metabolism of xenobiotics by cytochrome P450|Chemical carcinogenesis - DNA adducts|Chemical carcinogenesis - reactive oxygen species	K00079					PF00106	adh_short	short chain dehydrogenase	IPR045313,IPR036291,IPR020904,IPR002347	Family|Homologous_superfamily|Conserved_site|Family
A0A6P3E5D1	JEQ12_001949	Uncharacterized protein	33.0705	A0A6P3E5D1;W5PY43	JEQ12_001949;VPS26C	Uncharacterized protein;VPS26 endosomal protein sorting factor C	2.30735e-35	53.1073	0.670487	0.961987	0.679406	0.631819	0.919613	1.08075	0.886936	0.99613	0.906286	0.801215	0.881392	1.05388	0.769399	0.896889	0.908741	0.877077	0.841047	0.827248	0.887787	0.952437	0.996632	1.01821	0.943581	1.04905	Uncharacterized protein	101116695	JEQ12_001949	GO:0006886	intracellular protein transport								PF03643	Vps26	Vacuolar protein sorting-associated protein 26	IPR014752,IPR014756,IPR028934	Homologous_superfamily|Homologous_superfamily|Family
A0A6P3E5E5	JEQ12_017327	Uncharacterized protein	7.71605	A0A6P3E5E5;W5PDX5	JEQ12_017327;SMIM20	Uncharacterized protein;Small integral membrane protein 20	8.73213e-19	47.4349	0.453703	0.816461	1.2969	1.37022	0.998028	0.717253	0.966925	0.658497	0.954111	0.41246	0.270376	0.682923	1.36497	1.0799	0.260723	1.04007	0.993855	0.905909	1.09385	0.868492	0.974664	0.519827	1.17476	0.662408	Uncharacterized protein	101106940	JEQ12_017327	GO:0033617,GO:0016020,GO:0005739	mitochondrial cytochrome c oxidase assembly|membrane|mitochondrion								PF15061	DUF4538	Domain of unknown function (DUF4538)	IPR027917	Family
A0A6P3E5F3	LIAS	Lipoyl synthase, mitochondrial	41.865	A0A6P3E5F3;W5PQ59	LIAS	Lipoyl synthase, mitochondrial;Lipoyl synthase, mitochondrial	7.31816e-05	39.6202	-1.26408	0.102254	-0.321009	-0.545108	-0.687097	-1.04708	-0.363786	-1.17612	-1.10395	-0.948721	-0.529581	-0.892875	-1.32716	-1.18033	-0.94372	-0.862627	-0.515033	-0.779497	-0.61214	-1.52463	-0.432874	-0.837281	-0.817625	-0.934217	Lipoyl synthase, mitochondrial	101113851	LIAS	GO:0009249,GO:0005739,GO:0051539,GO:0016992,GO:0046872	protein lipoylation|mitochondrion|4 iron, 4 sulfur cluster binding|lipoate synthase activity|metal ion binding	oas00785	Lipoic acid metabolism	K03644					PF16881,PF04055	LIAS_N|Radical_SAM	N-terminal domain of lipoyl synthase of Radical_SAM family|Radical SAM superfamily	IPR013785,IPR006638,IPR031691,IPR003698,IPR007197	Homologous_superfamily|Domain|Domain|Family|Domain
A0A6P3E5F6	JEQ12_016091	6-phosphogluconolactonase	27.572	A0A6P3E5F6;W5Q4B6	JEQ12_016091;PGLS	6-phosphogluconolactonase	1.38195e-51	57.6583	3.45367	3.15698	3.14685	3.3272	3.40078	3.4796	3.04039	3.31389	3.69707	3.43447	3.31333	3.42881	3.6039	3.31832	3.00452	3.40874	3.33989	3.44498	3.6698	3.46489	3.3221	3.391	3.66616	3.36268	6-phosphogluconolactonase	101111093	JEQ12_016091	GO:0005975,GO:0006098,GO:0017057	carbohydrate metabolic process|pentose-phosphate shunt|6-phosphogluconolactonase activity	oas00030	Pentose phosphate pathway	K01057					PF01182	Glucosamine_iso	Glucosamine-6-phosphate isomerases/6-phosphogluconolactonase	IPR005900,IPR006148,IPR037171,IPR039104	Domain|Domain|Homologous_superfamily|Family
A0A6P3E5H5	JEQ12_016214	Uncharacterized protein	38.2173	A0A6P3E5H5;W5P5Y7	JEQ12_016214;DNAJB1	Uncharacterized protein;DnaJ heat shock protein family (Hsp40) member B1	1.32962e-35	53.1808	2.98023	2.96016	3.07206	3.1156	3.31486	3.29292	3.25079	3.29214	3.38078	3.17902	3.389	3.18114	3.24845	3.26566	3.12194	3.29337	3.12108	3.2359	3.21614	3.21761	3.39364	3.21266	3.25032	3.15499	Uncharacterized protein	101122104	JEQ12_016214	GO:0006457,GO:0051082	protein folding|unfolded protein binding	oas04141,oas05164	Protein processing in endoplasmic reticulum|Influenza A	K09507					PF00226,PF01556	DnaJ|DnaJ_C	DnaJ domain|DnaJ C terminal domain	IPR002939,IPR001623,IPR018253,IPR008971,IPR036869	Domain|Domain|Conserved_site|Homologous_superfamily|Homologous_superfamily
A0A6P3E5I0	CALR	Calreticulin	48.0586	A0A6P3E5I0;A0A6P7E595	CALR;JEQ12_016251	Calreticulin	4.19672e-41	54.8229	4.90701	5.34697	5.13436	4.90997	4.96808	5.00727	5.14715	5.60157	5.23286	5.51508	5.31376	5.11683	5.07671	4.91961	5.28389	4.99482	5.25704	5.20302	4.95806	5.11204	5.24773	5.14558	4.8453	5.25963	Calreticulin	101104396	CALR	GO:0006457,GO:0005788,GO:0005509,GO:0051082	protein folding|endoplasmic reticulum lumen|calcium ion binding|unfolded protein binding	oas04141,oas04145,oas04612,oas05166,oas05170,oas05168,oas05163,oas05169,oas05142	Protein processing in endoplasmic reticulum|Phagosome|Antigen processing and presentation|Human T-cell leukemia virus 1 infection|Human immunodeficiency virus 1 infection|Herpes simplex virus 1 infection|Human cytomegalovirus infection|Epstein-Barr virus infection|Chagas disease	K08057	KOG0674	O	unfolded protein binding	Posttranslational modification, protein turnover, chaperones	PF00262	Calreticulin	Calreticulin family	IPR001580,IPR018124,IPR009169,IPR009033,IPR013320	Family|Conserved_site|Family|Homologous_superfamily|Homologous_superfamily
A0A6P3E5J0	EIF3G	Eukaryotic translation initiation factor 3 subunit G	35.611	A0A6P3E5J0;W5Q0G0	EIF3G	Eukaryotic translation initiation factor 3 subunit G	4.40556e-32	52.0696	3.27269	3.48052	3.32299	3.09888	3.27234	3.55425	3.33897	3.33088	3.30596	3.49177	3.53186	3.21851	3.61328	3.19974	3.46322	3.36493	3.40419	3.33233	3.20383	2.82197	3.12294	3.40593	3.41156	3.47581	Eukaryotic translation initiation factor 3 subunit G	101111798	EIF3G	GO:0001732,GO:0016282,GO:0033290,GO:0005852,GO:0005634,GO:0048471,GO:0003723,GO:0003743	formation of cytoplasmic translation initiation complex|eukaryotic 43S preinitiation complex|eukaryotic 48S preinitiation complex|eukaryotic translation initiation factor 3 complex|nucleus|perinuclear region of cytoplasm|RNA binding|translation initiation factor activity								PF12353,PF00076	eIF3g|RRM_1	Eukaryotic translation initiation factor 3 subunit G |RNA recognition motif. (a.k.a. RRM, RBD, or RNP domain)	IPR017334,IPR024675,IPR034240,IPR012677,IPR035979,IPR000504	Family|Domain|Domain|Homologous_superfamily|Homologous_superfamily|Domain
A0A6P3E5J3	JEQ12_008678	Uncharacterized protein	51.465	A0A6P3E5J3;W5P6Q1	JEQ12_008678;FBXW2	Uncharacterized protein;F-box and WD repeat domain containing 2	3.15277e-42	55.1426	-0.764083	-1.03432	-0.662745	-0.950449	-1.10727	-0.4248	-0.971413	-0.758571	-0.636788	-0.903033	-0.728189	-0.742884	-0.700805	-1.34288	-0.46571	-1.28202	-1.55479	-0.673475	-0.967003	-1.16316	-1.20212	-1.15346	-1.3212	-1.19555	Uncharacterized protein	101122758	JEQ12_008678										PF12937,PF00400	F-box-like|WD40	F-box-like|WD domain, G-beta repeat	IPR036047,IPR001810,IPR042627,IPR020472,IPR015943,IPR001680,IPR019775,IPR036322	Homologous_superfamily|Domain|Family|Repeat|Homologous_superfamily|Repeat|Conserved_site|Homologous_superfamily
A0A6P3E5K6	JEQ12_017487	RRM domain-containing protein	41.4468	A0A6P3E5K6;W5PQN0	JEQ12_017487;GRSF1	RRM domain-containing protein;G-rich RNA sequence binding factor 1	1.10332e-35	53.2058	0.258846	0.624565	0.379644	0.519803	0.629379	0.582367	0.479206	0.682926	0.556187	0.829185	0.622418	0.199275	0.0162232	0.414116	0.484977	0.601738	0.331797	0.352454	0.108411	0.35043	0.615925	0.638152	0.579305	0.606486	RRM domain-containing protein	101122864	JEQ12_017487	GO:0003723	RNA binding								PF00076	RRM_1	RNA recognition motif. (a.k.a. RRM, RBD, or RNP domain)	IPR034424,IPR034425,IPR034426,IPR012677,IPR035979,IPR000504	Domain|Domain|Domain|Homologous_superfamily|Homologous_superfamily|Domain
A0A6P3E5L6	JEQ12_016377	Uncharacterized protein	30.0798	A0A6P3E5L6;W5NXA7;W5NXA8	JEQ12_016377;LOC101102057;LOC101102057	Uncharacterized protein;CD209 antigen-like protein 2;CD209 antigen-like protein 2	4.70312e-32	52.0603	0.909428	2.26638	0.448985	1.09859	-0.56962	0.749483	0.448409	0.513032	0.438653	0.386732	-0.52263	0.872242	-1.3019	-0.0153313	0.748612	0.504829	0.529315	0.860008	0.241085	0.88442	-0.13117	0.290313	0.141925	0.319717	Uncharacterized protein	101102057	JEQ12_016377			oas03260,oas03264,oas04145,oas04625,oas05162,oas05152	Virion - Human immunodeficiency virus|Virion - Flavivirus|Phagosome|C-type lectin receptor signaling pathway|Measles|Tuberculosis	K06563					PF00059	Lectin_C	Lectin C-type domain	IPR001304,IPR016186,IPR018378,IPR033989,IPR016187	Domain|Homologous_superfamily|Conserved_site|Domain|Homologous_superfamily
A0A6P3E5L9	JEQ12_017527	Uncharacterized protein	55.912	A0A6P3E5L9	JEQ12_017527	Uncharacterized protein	3.5501e-41	54.8442	1.20125	1.2533	1.23582	1.12938	1.30089	1.34488	1.42676	1.19723	1.3857	1.34975	1.47638	1.09765	1.32196	1.33872	1.12333	1.27621	1.27585	1.23382	1.353	1.32738	1.34087	1.44575	1.39532	1.36972	Uncharacterized protein	101109017	JEQ12_017527	GO:0005643	nuclear pore	oas03013,oas05014	Nucleocytoplasmic transport|Amyotrophic lateral sclerosis	K14308					PF13874,PF18437	Nup54|Nup54_C	Nucleoporin complex subunit 54|Nup54 C-terminal interacting domain	IPR024864,IPR025712,IPR040985	Family|Domain|Domain
A0A6P3E5M7	JEQ12_016423	ATP-dependent Clp protease proteolytic subunit	29.6934	A0A6P3E5M7;W5P8B9	JEQ12_016423;CLPP	ATP-dependent Clp protease proteolytic subunit	1.55499e-36	53.4659	0.725894	-0.114655	0.147817	0.414611	0.675285	0.28455	0.609833	0.129087	0.313533	-0.216029	0.218936	0.192131	0.427747	0.201949	-0.376276	0.291125	0.533566	0.0884396	0.700321	0.505034	0.548457	-0.302952	0.236481	-0.0349873	ATP-dependent Clp protease proteolytic subunit	101106323	JEQ12_016423	GO:0006508,GO:0004176,GO:0004252	proteolysis|ATP-dependent peptidase activity|serine-type endopeptidase activity								PF00574	CLP_protease	Clp protease	IPR001907,IPR029045,IPR023562,IPR033135,IPR018215	Family|Homologous_superfamily|Family|Active_site|Active_site
A0A6P3E5M8	JEQ12_000738	Vesicle-trafficking protein SEC22b	24.7566	A0A6P3E5M8;W5QGX9	JEQ12_000738;SEC22B	Vesicle-trafficking protein SEC22b	3.51936e-30	51.4492	1.91437	2.4043	2.16015	1.94971	1.8589	2.06544	2.06966	2.31687	2.4051	2.65166	2.34905	2.44059	2.09317	2.17217	2.37179	1.86669	2.27176	2.31195	2.34225	1.99688	2.27779	2.31331	2.10103	2.25632	Vesicle-trafficking protein SEC22b	101112362	JEQ12_000738	GO:0006888,GO:0006890,GO:0005789,GO:0033116,GO:0005794,GO:0042470,GO:0005484	endoplasmic reticulum to Golgi vesicle-mediated transport|retrograde vesicle-mediated transport, Golgi to endoplasmic reticulum|endoplasmic reticulum membrane|endoplasmic reticulum-Golgi intermediate compartment membrane|Golgi apparatus|melanosome|SNAP receptor activity	oas04130,oas04145,oas05134	SNARE interactions in vesicular transport|Phagosome|Legionellosis	K08517					PF13774,PF00957	Longin|Synaptobrevin	Regulated-SNARE-like domain|Synaptobrevin	IPR011012,IPR010908,IPR044565,IPR001388,IPR042855	Homologous_superfamily|Domain|Family|Family|Domain
A0A6P3E5N1	JEQ12_016439	MICOS complex subunit MIC13	13.3324	A0A6P3E5N1	JEQ12_016439	MICOS complex subunit MIC13	1.833e-22	48.8127	-0.629854	-0.34867	-0.469734	-0.892592	-0.770936	-0.316878	-1.11477	-0.938305	-0.373811	-1.10354	-0.641864	-1.06551	-0.535584	-0.35564	-0.703787	-0.438751	-1.08001	-1.07919	-0.582446	-1.3533	-1.03069	-1.0088	-1.51767	-0.996726	MICOS complex subunit MIC13	101109702	JEQ12_016439	GO:0061617	MICOS complex								PF15884	QIL1	MICOS complex subunit MIC13, QIL1	IPR026769	Family
A0A6P3E5N7	JEQ12_000768	DNA-directed RNA polymerase III subunit RPC3	60.5957	A0A6P3E5N7;W5QHC5	JEQ12_000768;POLR3C	DNA-directed RNA polymerase III subunit RPC3	1.76852e-17	46.9086	-1.57837	-2.04437	-1.53898	-1.62321	-1.56558	-1.92847	-1.79279	-1.45085	-1.72446	-2.1063	-1.57635	-2.00325	-1.5874	-2.19966	-2.0663	-1.7078	-1.55083	-2.07174	-2.02963	-1.67669	-2.40219	-2.36318	-2.00628	-2.06687	DNA-directed RNA polymerase III subunit RPC3	101116616	JEQ12_000768	GO:0006351,GO:0005666,GO:0003697	DNA-templated transcription|RNA polymerase III complex|single-stranded DNA binding	oas03020,oas04623	RNA polymerase|Cytosolic DNA-sensing pathway	K03023					PF08221,PF05645	HTH_9|RNA_pol_Rpc82	RNA polymerase III subunit RPC82 helix-turn-helix domain|RNA polymerase III subunit RPC82	IPR013197,IPR008806,IPR039748,IPR036388	Domain|Domain|Family|Homologous_superfamily
A0A6P3E5P1	JEQ12_017588	Uncharacterized protein	33.4843	A0A6P3E5P1;W5P446	JEQ12_017588;HSD17B13	Uncharacterized protein;Hydroxysteroid 17-beta dehydrogenase 13	9.77041e-30	51.3032	0.546305	0.832611	1.13742	1.6541	-0.578436	2.30997	1.88186	1.57649	1.5021	1.24347	2.11357	2.2087	2.19597	2.13976	1.69079	1.61369	2.3304	0.418565	1.45736	0.533389	2.22933	0.817804	1.14584	1.65935	Uncharacterized protein	101122359	JEQ12_017588										PF00106	adh_short	short chain dehydrogenase	IPR036291,IPR002347	Homologous_superfamily|Family
A0A6P3E5Q7	JEQ12_017650	GrpE protein homolog	24.5163	A0A6P3E5Q7;W5PPL5	JEQ12_017650;GRPEL1	GrpE protein homolog	1.83445e-31	51.8697	1.96925	2.00271	2.09091	1.99131	2.23949	1.85718	1.9997	2.02314	1.87207	2.20271	2.15876	1.92999	1.95534	1.90478	2.07293	1.85729	2.02299	1.91665	1.8855	1.89856	1.79822	1.91947	1.96969	2.0549	GrpE protein homolog	100037672	JEQ12_017650	GO:0006457,GO:0005759,GO:0000774,GO:0042803,GO:0051087	protein folding|mitochondrial matrix|adenyl-nucleotide exchange factor activity|protein homodimerization activity|protein-folding chaperone binding								PF01025	GrpE	GrpE	IPR000740,IPR013805,IPR009012	Family|Homologous_superfamily|Homologous_superfamily
A0A6P3E5R0	JEQ12_008887	Uncharacterized protein	21.1915	A0A6P3E5R0;W5PHG7	JEQ12_008887;DCTN3	Uncharacterized protein;Dynactin subunit 3	1.10643e-12	44.7677	1.39324	1.40422	0.913902	1.40715	1.46247	1.27716	1.24591	1.33547	1.05995	1.06179	0.870805	1.42046	1.0745	1.26885	1.27285	1.12333	1.39478	1.20954	0.923821	1.31919	1.22858	0.953151	1.16103	1.17037	Uncharacterized protein	101121236	JEQ12_008887	GO:0061640,GO:0005869	cytoskeleton-dependent cytokinesis|dynactin complex	oas04814,oas05132,oas05014,oas05016,oas05022	Motor proteins|Salmonella infection|Amyotrophic lateral sclerosis|Huntington disease|Pathways of neurodegeneration - multiple diseases	K10425					PF07426	Dynactin_p22	Dynactin subunit p22	IPR009991	Family
A0A6P3E5R3	JEQ12_016596	Clathrin light chain	23.0892	A0A6P3E5R3;W5NVY3	JEQ12_016596;CLTB	Clathrin light chain	1.1029e-14	45.6971	2.5148	2.46609	2.44105	2.51649	2.54209	2.94429	2.46233	2.72292	2.80216	2.47681	2.72132	2.61228	2.72787	2.60786	1.62498	2.43497	2.56623	2.59355	2.54981	2.52029	2.55125	2.60701	2.82965	2.74232	Clathrin light chain	101117328	JEQ12_016596	GO:0006886,GO:0016192,GO:0030132,GO:0030130,GO:0005198	intracellular protein transport|vesicle-mediated transport|clathrin coat of coated pit|clathrin coat of trans-Golgi network vesicle|structural molecule activity	oas04144,oas04142,oas04961,oas04721,oas05100,oas05016	Endocytosis|Lysosome|Endocrine and other factor-regulated calcium reabsorption|Synaptic vesicle cycle|Bacterial invasion of epithelial cells|Huntington disease	K04645					PF01086	Clathrin_lg_ch	Clathrin light chain	IPR000996	Family
A0A6P3E5R5	JEQ12_008896	Ubiquitin-associated protein 1	55.1255	A0A6P3E5R5;A0A6P3T880	JEQ12_008896;UBAP1	Ubiquitin-associated protein 1;Ubiquitin associated protein 1	2.44611e-34	52.7886	-1.9307	-2.97635	-1.27851	-1.47284	-2.36668	-1.39865	-2.22088	-2.1798	-1.82313	-1.5034	-1.36453	-1.83661	-2.21027	-2.04769	-2.09569	-1.71718	-1.83442	-1.62551	-1.58507	-1.9551	-1.69793	-1.92161	-1.66334	-1.70664	Ubiquitin-associated protein 1	101101952	JEQ12_008896	GO:0043162,GO:0000813,GO:0043130	ubiquitin-dependent protein catabolic process via the multivesicular body sorting pathway|ESCRT I complex|ubiquitin binding											IPR015940,IPR009060,IPR038870,IPR042575,IPR023340	Domain|Homologous_superfamily|Family|Homologous_superfamily|Domain
A0A6P3E5S0	JEQ12_008905	Uncharacterized protein	123.406	A0A6P3E5S0;W5PIB9	JEQ12_008905;NFX1	Uncharacterized protein;Nuclear transcription factor, X-box binding 1	8.92767e-24	49.2792	-0.555045	-0.102434	-0.686406	-1.03415	-0.711003	-0.935159	-0.762717	-0.38685	-1.02318	-0.523584	-0.663876	-0.794609	-0.6921	-0.694694	-0.625436	-1.39535	-0.74007	-0.577144	-1.18842	-0.864357	-0.658356	-0.853996	-1.33748	-0.882047	Uncharacterized protein	101103948	JEQ12_008905	GO:0005634,GO:0003700,GO:0003676,GO:0008270	nucleus|DNA-binding transcription factor activity|nucleic acid binding|zinc ion binding	oas05165	Human papillomavirus infection	K12236					PF01424,PF01422	R3H|zf-NF-X1	R3H domain|NF-X1 type zinc finger	IPR034078,IPR001374,IPR036867,IPR034076,IPR000967,IPR019787,IPR001841	Family|Domain|Homologous_superfamily|Domain|Domain|Domain|Domain
A0A6P3E5S2	JEQ12_016625	Uncharacterized protein	27.1992	A0A6P3E5S2;W5P7D3;W5P7D5	JEQ12_016625;TMED9;TMED9	Uncharacterized protein;Transmembrane p24 trafficking protein 9;Transmembrane p24 trafficking protein 9	2.88207e-41	54.8705	2.59924	3.1828	3.12382	2.99388	2.97043	3.11654	2.77614	3.28058	3.29251	3.26313	3.78657	2.63893	3.24365	2.67383	2.52323	2.62037	2.71582	2.88173	3.13352	2.35517	2.66444	2.92677	3.62315	3.5977	Uncharacterized protein	101102809	JEQ12_016625	GO:0005789	endoplasmic reticulum membrane								PF01105	EMP24_GP25L	emp24/gp25L/p24 family/GOLD	IPR015720,IPR009038	Family|Domain
A0A6P3E5T1	JEQ12_017789	AAA+ ATPase domain-containing protein	44.173	A0A6P3E5T1;W5Q805	JEQ12_017789;PSMC6	AAA+ ATPase domain-containing protein;Proteasome 26S subunit, ATPase 6	6.13287e-43	55.3432	2.9393	2.86499	2.97515	2.93109	3.02118	2.96011	3.01399	2.83599	3.05077	2.89689	2.91475	2.8695	2.9727	2.91699	3.01812	2.96036	3.0747	2.94789	2.90687	2.94927	3.1098	3.12956	3.01765	2.97786	AAA+ ATPase domain-containing protein	101116401	JEQ12_017789	GO:0030163,GO:0005737,GO:0031090,GO:0000502,GO:0005524,GO:0016887,GO:0036402	protein catabolic process|cytoplasm|organelle membrane|proteasome complex|ATP binding|ATP hydrolysis activity|proteasome-activating activity	oas03050,oas05169,oas05010,oas05012,oas05014,oas05016,oas05017,oas05020,oas05022	Proteasome|Epstein-Barr virus infection|Alzheimer disease|Parkinson disease|Amyotrophic lateral sclerosis|Huntington disease|Spinocerebellar ataxia|Prion disease|Pathways of neurodegeneration - multiple diseases	K03064					PF00004,PF17862,PF16450	AAA|AAA_lid_3|Prot_ATP_ID_OB	ATPase family associated with various cellular activities (AAA)|AAA+ lid domain|Proteasomal ATPase OB C-terminal domain	IPR005937,IPR003593,IPR041569,IPR003959,IPR003960,IPR012340,IPR027417,IPR032501	Family|Domain|Domain|Domain|Conserved_site|Homologous_superfamily|Homologous_superfamily|Domain
A0A6P3E5U3	JEQ12_008984	Uncharacterized protein	46.8501	A0A6P3E5U3;W5PMM2;W5PMM5	JEQ12_008984;ERP44;ERP44	Uncharacterized protein;Endoplasmic reticulum protein 44;Endoplasmic reticulum protein 44	6.33071e-35	52.9715	2.85074	3.05965	3.08404	3.07309	2.99881	2.90571	3.1351	3.23487	3.23284	3.17739	3.22979	3.03768	3.03487	3.06662	3.09341	2.93	3.09332	3.16532	3.21931	3.14276	3.10494	3.15338	3.09236	3.08304	Uncharacterized protein	101122251	JEQ12_008984										PF00085,PF13848	Thioredoxin|Thioredoxin_6	Thioredoxin|Thioredoxin-like domain	IPR041862,IPR041870,IPR036249,IPR013766	Domain|Domain|Homologous_superfamily|Domain
A0A6P3E5U7	JEQ12_017839	Acidic leucine-rich nuclear phosphoprotein 32 family member	28.6175	A0A6P3E5U7;W5QB24	JEQ12_017839;ANP32A	Acidic leucine-rich nuclear phosphoprotein 32 family member	3.67966e-25	49.7612	3.67326	3.60639	3.55927	3.37154	3.761	3.58822	3.60847	3.69426	3.76217	3.57767	3.63362	3.46223	3.55178	3.49471	3.57503	3.37422	3.48377	3.637	3.68201	3.71248	3.66454	3.65601	3.37932	3.6215	Acidic leucine-rich nuclear phosphoprotein 32 family member	101105917	JEQ12_017839										PF14580	LRR_9	Leucine-rich repeat	IPR045081,IPR001611,IPR032675,IPR003603	Family|Repeat|Homologous_superfamily|Domain
A0A6P3E5W0	JEQ12_016792	Heat shock 70 kDa protein 4	94.4433	A0A6P3E5W0	JEQ12_016792	Heat shock 70 kDa protein 4	6.36355e-38	53.887	4.38604	4.38102	4.46246	4.60607	4.57541	4.68327	4.38056	4.48596	4.5118	4.40427	4.47795	4.49722	4.61926	4.55165	4.48731	4.51444	4.5767	4.48021	4.69772	4.4806	4.51179	4.52371	4.44809	4.63673	Heat shock 70 kDa protein 4	101122782	JEQ12_016792	GO:0005737,GO:0005524,GO:0140662	cytoplasm|ATP binding|ATP-dependent protein folding chaperone	oas04530,oas04612,oas05417	Tight junction|Antigen processing and presentation|Lipid and atherosclerosis	K09489					PF00012	HSP70	Hsp70 protein	IPR043129,IPR018181,IPR029048,IPR029047,IPR013126,IPR042052	Homologous_superfamily|Conserved_site|Homologous_superfamily|Homologous_superfamily|Family|Domain
A0A6P3E5W6	JEQ12_016809	Chemokine interleukin-8-like domain-containing protein	11.744	A0A6P3E5W6;W5PZA5	JEQ12_016809;CXCL14	Chemokine interleukin-8-like domain-containing protein;C-X-C motif chemokine ligand 14	2.70181e-05	40.4397	-1.55577	-1.38172	-0.629192	-1.27718	-0.388363	-0.551704	-1.32187	-0.635609	-0.577452	-1.32911	-0.750552	-1.01141	-0.167367	-1.26493	-0.87132	0.108507	-1.99404	-1.97051	-1.02555	-0.50817	-0.92572	-1.22189	-0.384932	-0.881383	Chemokine interleukin-8-like domain-containing protein	101105243	JEQ12_016809	GO:0006955,GO:0005576,GO:0008009	immune response|extracellular region|chemokine activity	oas04060,oas04061,oas04062	Cytokine-cytokine receptor interaction|Viral protein interaction with cytokine and cytokine receptor|Chemokine signaling pathway	K10033					PF00048	IL8	Small cytokines (intecrine/chemokine), interleukin-8 like	IPR001811,IPR039088,IPR036048	Domain|Family|Homologous_superfamily
A0A6P3E5W7	JEQ12_009053	Non-lysosomal glucosylceramidase	103.091	A0A6P3E5W7;W5PQE2;W5PQE3	JEQ12_009053;GBA2;GBA2	Non-lysosomal glucosylceramidase	0.00195856	33.1502	-1.55873	-1.36312	-1.47184	-0.994362	-0.560853	-0.985889	-1.05847	-1.25058	-0.491865	-1.2291	-1.2465	-0.740908	-1.44178	-0.853576	-0.855587	-1.0018	-1.32338	-0.578655	-1.04893	-1.41601	-0.462029	-1.24087	-1.63914	-1.21465	Non-lysosomal glucosylceramidase	101113987	JEQ12_009053	GO:0005975,GO:0006680,GO:0005789,GO:0000139,GO:0004348	carbohydrate metabolic process|glucosylceramide catabolic process|endoplasmic reticulum membrane|Golgi membrane|glucosylceramidase activity	oas00600,oas00511	Sphingolipid metabolism|Other glycan degradation	K17108					PF04685,PF12215	DUF608|Glyco_hydr_116N	Glycosyl-hydrolase family 116, catalytic region|beta-glucosidase 2, glycosyl-hydrolase family 116 N-term	IPR008928,IPR012341,IPR014551,IPR006775,IPR024462	Homologous_superfamily|Homologous_superfamily|Family|Domain|Domain
A0A6P3E5X6	JEQ12_017921	Uncharacterized protein	76.841	A0A6P3E5X6;W5QDQ0	JEQ12_017921;LRP10	Uncharacterized protein;LDL receptor related protein 10	0.000134279	39.0731	-1.2077	-1.34447	-0.588614	-0.269103	-0.981859	0.0110618	-0.587295	-0.873858	-0.588674	-0.838202	-0.965086	-1.07926	-0.702813	-0.767428	-1.2235	-0.546184	-0.824762	-1.00818	-0.408052	-0.0886231	-0.755106	-0.436601	-0.37495	-0.610563	Uncharacterized protein	101104404	JEQ12_017921										PF00057	Ldl_recept_a	Low-density lipoprotein receptor domain class A	IPR000859,IPR036055,IPR023415,IPR002172,IPR035914	Domain|Homologous_superfamily|Conserved_site|Repeat|Homologous_superfamily
A0A6P3E5Y3	JEQ12_017959	Uncharacterized protein	64.4459	A0A6P3E5Y3;W5QEC3	JEQ12_017959;METTL3	Uncharacterized protein;Methyltransferase like 3	4.27366e-31	51.7502	-0.795775	-1.23502	-1.05024	-1.11848	-0.870752	-0.970554	-1.03764	-1.06193	-0.996679	-1.1445	-1.04974	-0.892319	-0.900819	-1.11583	-0.913573	-1.01054	-1.14008	-1.1338	-0.862008	-0.792698	-0.936052	-0.967718	-0.827603	-0.908423	Uncharacterized protein	101108050	JEQ12_017959	GO:0005634,GO:0016422	nucleus|mRNA (2'-O-methyladenosine-N6-)-methyltransferase activity								PF05063	MT-A70	MT-A70	IPR025848,IPR007757,IPR029063	Family|Family|Homologous_superfamily
A0A6P3E5Y4	JEQ12_009112	hyaluronoglucosaminidase	154.551	A0A6P3E5Y4;W5PTE6	JEQ12_009112;CEMIP2	hyaluronoglucosaminidase	1.52838e-18	47.3388	-1.73764	-1.42316	-1.03461	-0.783418	-1.42222	-1.014	-0.839014	-0.712305	-0.823622	-0.973372	-1.04794	-0.838399	-0.561632	-1.48803	-1.33235	-0.631021	-1.23532	-1.57259	-1.50454	-0.743633	-1.14593	-0.537303	-0.777962	-1.63608	hyaluronoglucosaminidase	101102701	JEQ12_009112	GO:0005886,GO:0004415	plasma membrane|hyalurononglucosaminidase activity								PF10162,PF15711	G8|ILEI	G8 domain|Interleukin-like EMT inducer	IPR019316,IPR039477,IPR011050,IPR039473	Domain|Domain|Homologous_superfamily|Domain
A0A6P3E5Y5	JEQ12_017974	Ribonuclease A-domain domain-containing protein	18.5966	A0A6P3E5Y5;Q29543;W5QEN4	JEQ12_017974;BRN;LOC101112822	Ribonuclease A-domain domain-containing protein;Brain ribonuclease;Brain ribonuclease-like	2.2363e-24	49.4893	-0.937878	0.0492636	-0.598903	-1.07878	-1.3944	-0.204925	-0.522874	-0.657029	-0.971291	-0.772009	-1.4582	-0.552373	-0.987419	-0.572248	-0.266128	-1.31446	-1.00326	-0.467846	-1.24049	-1.31648	-0.896077	-0.969877	-1.60362	-0.832553	Ribonuclease A-domain domain-containing protein	101112822	JEQ12_017974	GO:0005576,GO:0004519,GO:0003676	extracellular region|endonuclease activity|nucleic acid binding								PF00074	RnaseA	Pancreatic ribonuclease	IPR001427,IPR036816,IPR023411,IPR023412	Family|Homologous_superfamily|Active_site|Domain
A0A6P3E5Y7	JEQ12_009130	Uncharacterized protein	131.733	A0A6P3E5Y7;W5PU47	JEQ12_009130;TJP2	Uncharacterized protein;Tight junction protein 2	1.77731e-43	55.4946	1.78738	1.85467	2.13244	1.90154	1.94129	1.81609	2.08394	1.9021	1.65924	1.93835	1.94827	1.66085	1.65399	1.707	1.92596	1.89169	1.77436	2.0222	1.6945	1.71644	2.10968	2.06052	2.09564	2.00607	Uncharacterized protein	443506	JEQ12_009130	GO:0005923,GO:0005886	bicellular tight junction|plasma membrane	oas04530	Tight junction	K06098					PF00625,PF00595,PF07653	Guanylate_kin|PDZ|SH3_2	Guanylate kinase|PDZ domain|Variant SH3 domain	IPR008145,IPR008144,IPR027417,IPR001478,IPR036034,IPR036028,IPR001452,IPR005417,IPR005419,IPR035598	Domain|Domain|Homologous_superfamily|Domain|Homologous_superfamily|Homologous_superfamily|Domain|Family|Family|Domain
A0A6P3E5Z1	JEQ12_016847	Uncharacterized protein	25.7205	A0A6P3E5Z1;W5Q725	JEQ12_016847;ECSCR	Uncharacterized protein;Endothelial cell surface expressed chemotaxis and apoptosis regulator	0.0013708	34.872	-2.31639	-2.94293	-1.54739	-2.85003	-2.82969	-2.45783	-1.65598	-1.29937	-2.60467	-2.71306	-1.57813	-2.7663	-2.77054	-1.18316	-1.58071	-2.01534	-0.943863	-1.20311	-2.24444	-2.34793	-2.31947	-1.35257	-2.19462	-1.19897	Uncharacterized protein	101115456	JEQ12_016847										PF15820	ECSCR	Endothelial cell-specific chemotaxis regulator	IPR026247	Family
A0A6P3E5Z2	JEQ12_009135	Uncharacterized protein	62.147	A0A6P3E5Z2;W5PUA9	JEQ12_009135;PGM5	Uncharacterized protein;Phosphoglucomutase 5	5.29462e-28	50.7267	3.2989	2.90259	2.72021	2.97786	2.28128	3.106	3.02068	3.29655	3.15564	2.56542	3.05776	2.89421	3.32796	2.89639	3.16571	3.34085	3.23784	3.29862	2.96622	2.96697	3.01098	2.82905	3.08854	3.09294	Uncharacterized protein	101108630	JEQ12_009135	GO:0005975,GO:0000287,GO:0004614	carbohydrate metabolic process|magnesium ion binding|phosphoglucomutase activity								PF02878,PF02879,PF02880	PGM_PMM_I|PGM_PMM_II|PGM_PMM_III	Phosphoglucomutase/phosphomannomutase, alpha/beta/alpha domain I|Phosphoglucomutase/phosphomannomutase, alpha/beta/alpha domain II|Phosphoglucomutase/phosphomannomutase, alpha/beta/alpha domain III	IPR005844,IPR016055,IPR005845,IPR005846,IPR036900,IPR016066,IPR005841,IPR045244	Domain|Homologous_superfamily|Domain|Domain|Homologous_superfamily|Conserved_site|Family|Family
A0A6P3E5Z5	S100A3	Protein S100	11.3101	A0A6P3E5Z5;A0A6P3TJ11	S100A3;JEQ12_000902	Protein S100	6.86148e-22	48.6055	3.89373	4.30643	4.27819	4.3598	4.34554	4.24517	4.43728	4.01177	3.80268	4.14064	3.91023	4.51849	4.24935	4.25171	3.99021	4.03442	4.51683	4.30723	4.4857	3.99673	4.31036	4.1047	4.19464	4.0994	Protein S100	106990134	S100A3	GO:0005509,GO:0046914	calcium ion binding|transition metal ion binding				ENOG502SSQB	S	calcium ion binding	Function unknown	PF01023	S_100	S-100/ICaBP type calcium binding domain	IPR011992,IPR018247,IPR002048,IPR034325,IPR001751,IPR013787	Homologous_superfamily|Binding_site|Domain|Domain|Conserved_site|Domain
A0A6P3E603	JEQ12_000911	Integrator complex subunit 3 N-terminal domain-containing protein	117.901	A0A6P3E603;W5NSM6	JEQ12_000911;INTS3	Integrator complex subunit 3 N-terminal domain-containing protein;Integrator complex subunit 3	1.99637e-38	54.0371	-0.562539	-0.786311	-0.316274	-0.399807	-0.26805	-0.650387	-0.645092	-0.79021	-0.758481	-0.681452	-0.31895	-0.678494	-0.562991	-0.385336	-0.58736	-0.410062	-0.920655	-0.39432	-0.362449	-0.571215	-0.386945	-0.383036	-0.376976	-0.549534	Integrator complex subunit 3 N-terminal domain-containing protein	101106729	JEQ12_000911										PF10189	Ints3_N	Integrator complex subunit 3 N-terminal	IPR045334,IPR019333	Family|Domain
A0A6P3E624	JEQ12_018105	GTP cyclohydrolase 1 feedback regulatory protein	9.61511	A0A6P3E624;W5QGB6	JEQ12_018105;GCHFR	GTP cyclohydrolase 1 feedback regulatory protein	3.02238e-37	53.6832	-4.08198	-3.37447	-4.42907	-2.94196	-3.17552	-2.40015	-2.70512	-2.59005	-3.15409	-1.97044	-3.25481	-2.64876	-3.16989	-2.51089	-2.72991	-3.59351	-3.47092	-4.56719	-4.16702	-3.93925	-2.24891	-2.06611	-2.77167	-2.09201	GTP cyclohydrolase 1 feedback regulatory protein	101110240	JEQ12_018105	GO:0009890,GO:0005829,GO:0031965	negative regulation of biosynthetic process|cytosol|nuclear membrane								PF06399	GFRP	GTP cyclohydrolase I feedback regulatory protein (GFRP)	IPR036717,IPR009112	Homologous_superfamily|Family
A0A6P3E628	JEQ12_018114	Chromatin-remodeling ATPase INO80	177.614	A0A6P3E628;W5QGH7	JEQ12_018114;INO80	Chromatin-remodeling ATPase INO80	1.94439e-38	54.0406	-2.77777	-2.43341	-2.53144	-2.78295	-2.64566	-2.70567	-2.53698	-3.04575	-2.56716	-2.18583	-1.93715	-2.20034	-2.73196	-3.09214	-2.54573	-2.35762	-2.88315	-2.78528	-3.67286	-2.77152	-3.23508	-2.63442	-2.3409	-3.20978	Chromatin-remodeling ATPase INO80	101112063	JEQ12_018114	GO:0006281,GO:0006351,GO:0031011,GO:0005524,GO:0140658,GO:0003677,GO:0016787	DNA repair|DNA-templated transcription|Ino80 complex|ATP binding|ATP-dependent chromatin remodeler activity|DNA binding|hydrolase activity								PF13892,PF00271,PF00176	DBINO|Helicase_C|SNF2-rel_dom	DNA-binding domain|Helicase conserved C-terminal domain|SNF2-related domain	IPR020838,IPR031047,IPR014001,IPR001650,IPR027417,IPR038718,IPR000330	Domain|Domain|Domain|Domain|Homologous_superfamily|Homologous_superfamily|Domain
A0A6P3E634	JEQ12_018130	Uncharacterized protein	61.0552	A0A6P3E634	JEQ12_018130	Uncharacterized protein	1.51319e-43	55.5149	2.61993	2.82614	2.73871	2.85505	2.67409	2.83408	2.73703	2.56637	2.78095	2.69755	2.54983	2.61111	2.84696	2.71386	2.91596	2.66221	2.94769	2.76355	2.69783	2.93904	2.75204	2.83593	2.82256	2.79833	Uncharacterized protein	101115625	JEQ12_018130	GO:0010008,GO:0005886,GO:0005524,GO:0005509,GO:0005525	endosome membrane|plasma membrane|ATP binding|calcium ion binding|GTP binding	oas04144	Endocytosis	K12477					PF18150,PF00350,PF12763,PF16880	DUF5600|Dynamin_N|EF-hand_4|EHD_N	Domain of unknown function (DUF5600)|Dynamin family|Cytoskeletal-regulatory complex EF hand|N-terminal EH-domain containing protein	IPR040990,IPR045063,IPR011992,IPR018247,IPR002048,IPR000261,IPR031692,IPR030381,IPR027417	Domain|Domain|Homologous_superfamily|Binding_site|Domain|Domain|Domain|Domain|Homologous_superfamily
A0A6P3E635	JEQ12_000963	Uncharacterized protein	45.4817	A0A6P3E635;W5P3B4	JEQ12_000963;DAP3	Uncharacterized protein;Death associated protein 3	3.66754e-14	45.4559	-1.01174	-0.715169	-0.796196	-1.14986	-1.00991	-1.08849	-0.764077	-1.07737	-1.20872	-1.34289	-1.22455	-0.892411	-1.38313	-1.14659	-1.18352	-1.09509	-1.11509	-0.906795	-0.99957	-0.557912	-0.725596	-1.33638	-0.858465	-1.12349	Uncharacterized protein	101120032	JEQ12_000963	GO:0006915,GO:0005761,GO:0015935	apoptotic process|mitochondrial ribosome|small ribosomal subunit								PF10236	DAP3	Mitochondrial ribosomal death-associated protein 3	IPR027417,IPR019368,IPR008092	Homologous_superfamily|Family|Family
A0A6P3E640	JEQ12_000976	Roadblock/LAMTOR2 domain-containing protein	13.5075	A0A6P3E640	JEQ12_000976	Roadblock/LAMTOR2 domain-containing protein	3.70932e-16	46.3521	0.25913	1.29853	0.687664	1.05798	0.719	0.659411	1.05704	0.235436	0.628339	0.299645	0.418498	0.925303	1.29659	0.932814	0.375158	0.770174	1.26851	0.39424	1.20569	1.22415	0.662122	0.500289	0.490075	0.77299	Roadblock/LAMTOR2 domain-containing protein	101122907	JEQ12_000976	GO:0032008,GO:0031902,GO:0005765,GO:0005085,GO:0060090	positive regulation of TOR signaling|late endosome membrane|lysosomal membrane|guanyl-nucleotide exchange factor activity|molecular adaptor activity	oas04150	mTOR signaling pathway	K20398					PF03259	Robl_LC7	Roadblock/LC7 domain	IPR037587,IPR004942	Family|Domain
A0A6P3E642	JEQ12_016970	Uncharacterized protein	16.2727	A0A6P3E642;W5PBP1	JEQ12_016970;RPS14	Uncharacterized protein;Ribosomal protein S14	2.33623e-28	50.8455	5.61032	5.86921	5.50932	6.04491	5.85157	6.24061	5.54481	5.56207	5.54286	5.61249	5.57847	5.72449	6.1983	5.85933	5.59571	5.76439	5.67611	5.3631	5.89937	5.63778	5.65131	5.66997	5.97584	5.68956	Uncharacterized protein	101102145	JEQ12_016970	GO:0006412,GO:1990904,GO:0005840,GO:0003735	translation|ribonucleoprotein complex|ribosome|structural constituent of ribosome	oas03010,oas05171	Ribosome|Coronavirus disease - COVID-19	K02955					PF00411	Ribosomal_S11	Ribosomal protein S11	IPR001971,IPR018102,IPR036967	Family|Conserved_site|Homologous_superfamily
A0A6P3E645	JEQ12_009406	RNA polymerase Rpb4/RPC9 core domain-containing protein	16.3543	A0A6P3E645;W5Q389	JEQ12_009406;POLR2D	RNA polymerase Rpb4/RPC9 core domain-containing protein;RNA polymerase II subunit D	1.66354e-21	48.4656	-0.330936	-0.239779	-0.196586	-0.247903	-0.408532	-0.10569	-0.13672	-0.189276	-0.152302	-0.159242	-0.379315	-0.360937	-0.53819	-0.0328519	-0.375518	-0.307486	-0.366756	-0.198773	-0.389207	-0.622775	-0.231748	-0.211974	-0.444925	-0.14168	RNA polymerase Rpb4/RPC9 core domain-containing protein	101107845	JEQ12_009406	GO:0006352,GO:0006366,GO:0000428,GO:0005634,GO:0000166	DNA-templated transcription initiation|transcription by RNA polymerase II|DNA-directed RNA polymerase complex|nucleus|nucleotide binding	oas03020,oas03420,oas05016	RNA polymerase|Nucleotide excision repair|Huntington disease	K03012					PF03874	RNA_pol_Rpb4	RNA polymerase Rpb4	IPR010997,IPR006590,IPR045222,IPR005574,IPR038324	Homologous_superfamily|Domain|Family|Family|Homologous_superfamily
A0A6P3E660	JEQ12_009444	Zinc finger CCCH domain-containing protein 15	48.4693	A0A6P3E660;W5Q562	JEQ12_009444;ZC3H15	Zinc finger CCCH domain-containing protein 15	2.39917e-30	51.5034	0.0118133	0.160761	0.394811	0.198417	0.253439	0.119059	0.109973	0.121375	0.15786	0.45258	0.214767	-0.170431	-0.043338	0.000406655	0.326508	-0.0230868	0.189265	0.139781	0.0142322	-0.137007	-0.0293048	0.286834	0.0705823	0.183061	Zinc finger CCCH domain-containing protein 15	101116282	JEQ12_009444	GO:0046872	metal ion binding								PF16543,PF00642	DFRP_C|zf-CCCH	DRG Family Regulatory Proteins, Tma46|Zinc finger C-x8-C-x5-C-x3-H type (and similar)	IPR032378,IPR000571,IPR036855	Domain|Domain|Homologous_superfamily
A0A6P3E662	JEQ12_000189	Uncharacterized protein	46.7108	A0A6P3E662;W5QG89	JEQ12_000189;SMAP2	Uncharacterized protein;Small ArfGAP2	1.69992e-15	46.0632	1.21569	1.20599	1.41768	1.23106	0.756629	1.1505	0.94778	1.40305	1.17061	1.42138	1.6246	0.934812	1.01013	1.11173	1.33916	0.844626	0.925959	1.11192	0.543672	1.04413	0.898148	0.964605	0.963943	1.11794	Uncharacterized protein	101122735	JEQ12_000189	GO:0005096	GTPase activator activity	oas04144	Endocytosis	K12486					PF01412	ArfGap	Putative GTPase activating protein for Arf	IPR037278,IPR001164,IPR038508	Homologous_superfamily|Domain|Homologous_superfamily
A0A6P3E666	TTC1	Tetratricopeptide repeat domain 1	33.6883	A0A6P3E666;A0A6P3ED65	TTC1;JEQ12_017036	Tetratricopeptide repeat domain 1;Tetratricopeptide repeat protein 1	3.68792e-35	53.0448	0.938666	0.673472	0.824784	0.763993	0.45663	0.693548	0.805248	0.922936	1.09196	0.542607	0.64403	0.601923	0.799402	0.962882	1.3155	0.887245	0.727031	1.07038	1.04862	0.768512	1.01136	0.961129	0.817788	0.820786	Tetratricopeptide repeat domain 1	101115619	TTC1						KOG4234	L	protein binding, bridging	Replication, recombination and repair	PF00515	TPR_1	Tetratricopeptide repeat	IPR011990,IPR001440,IPR019734	Homologous_superfamily|Repeat|Repeat
A0A6P3E669	JEQ12_018185	MIP18 family-like domain-containing protein	18.4492	A0A6P3E669;W5QHV9	JEQ12_018185;CIAO2A	MIP18 family-like domain-containing protein;Cytosolic iron-sulfur assembly component 2A	1.66543e-31	51.8835	-0.320564	-0.435348	-0.510185	-0.239718	-0.422956	0.136991	-0.475979	-0.442518	0.267768	-0.761741	-1.05978	-0.387825	-0.741769	-0.186469	-0.450443	-0.539087	-0.771438	-0.541224	0.0494958	0.0475204	-0.590718	-0.270383	0.0103532	-0.19468	MIP18 family-like domain-containing protein	101110334	JEQ12_018185	GO:0007059,GO:0106035	chromosome segregation|protein maturation by [4Fe-4S] cluster transfer								PF01883	FeS_assembly_P	Iron-sulfur cluster assembly protein	IPR034904,IPR039796,IPR002744	Homologous_superfamily|Family|Domain
A0A6P3E673	JEQ12_009477	DRBM domain-containing protein	34.4133	A0A6P3E673;W5Q7A3	JEQ12_009477;PRKRA	DRBM domain-containing protein;Protein activator of interferon induced protein kinase EIF2AK2	4.82576e-06	41.4609	-1.0667	-0.900144	-0.839318	-0.953318	-1.04806	-1.16852	-0.932936	-0.816239	-0.815	-1.13359	-0.883277	-0.815381	-1.0196	-1.28315	-1.19003	-1.464	-1.15839	-1.10141	-1.14418	-1.55181	-1.26681	-0.985437	-1.35222	-1.31559	DRBM domain-containing protein	101102289	JEQ12_009477	GO:0031047,GO:0048471,GO:0003723	RNA-mediated gene silencing|perinuclear region of cytoplasm|RNA binding								PF00035	dsrm	Double-stranded RNA binding motif	IPR014720,IPR044465,IPR044466,IPR044467	Domain|Domain|Domain|Domain
A0A6P3E681	JEQ12_018212	Uncharacterized protein	127.043	A0A6P3E681;W5QI40	JEQ12_018212;MYO1E	Uncharacterized protein;Myosin IE	6.53177e-36	53.2753	-0.0586488	-0.0984213	0.187422	0.177731	0.344181	0.238675	0.219776	-0.0415831	-0.303747	0.0463733	0.394298	0.0952694	0.172145	0.241058	0.248157	0.368536	0.158626	0.101817	-0.00054838	0.13855	0.249111	0.258099	0.497355	0.285957	Uncharacterized protein	101115463	JEQ12_018212	GO:0016459,GO:0003779,GO:0005524,GO:0003774	myosin complex|actin binding|ATP binding|cytoskeletal motor activity	oas04814	Motor proteins	K10356					PF00063,PF06017,PF00018	Myosin_head|Myosin_TH1|SH3_1	Myosin head (motor domain)|Unconventional myosin tail, actin- and lipid-binding|SH3 domain	IPR035507,IPR000048,IPR036961,IPR001609,IPR010926,IPR036072,IPR027417,IPR036028,IPR001452	Domain|Binding_site|Homologous_superfamily|Domain|Domain|Domain|Homologous_superfamily|Homologous_superfamily|Domain
A0A6P3E687	JEQ12_009520	Protein-serine/threonine kinase	49.4065	A0A6P3E687;W5NSB1	JEQ12_009520;PDK1	Protein-serine/threonine kinase	1.65598e-16	46.5025	0.0520193	0.619227	0.615451	0.673841	-0.00548636	0.432856	0.42582	0.712361	0.0127673	0.145699	0.29649	0.472527	0.550911	0.201749	0.336559	0.336838	0.507216	0.366333	0.138963	0.719399	0.711251	0.118758	-0.0232744	0.441187	Protein-serine/threonine kinase	101113205	JEQ12_009520	GO:0016310,GO:0005759,GO:0005524,GO:0004672	phosphorylation|mitochondrial matrix|ATP binding|protein kinase activity	oas04066,oas05230	HIF-1 signaling pathway|Central carbon metabolism in cancer	K12077					PF10436,PF02518	BCDHK_Adom3|HATPase_c	Mitochondrial branched-chain alpha-ketoacid dehydrogenase kinase|Histidine kinase-, DNA gyrase B-, and HSP90-like ATPase	IPR036784,IPR018955,IPR039028,IPR003594,IPR036890,IPR005467	Homologous_superfamily|Domain|Family|Domain|Homologous_superfamily|Domain
A0A6P3E694	JEQ12_018249	RNA polymerase-associated protein LEO1	75.6824	A0A6P3E694;W5QIH1	JEQ12_018249;LEO1	RNA polymerase-associated protein LEO1	3.76324e-18	47.1821	0.939083	0.995234	1.01691	1.43424	1.31311	0.926326	0.635422	1.03932	1.07604	1.38355	0.867342	0.693125	1.02069	0.645756	0.590724	1.13732	0.812208	1.01798	0.464447	0.71786	0.918442	0.772252	0.615274	1.19855	RNA polymerase-associated protein LEO1	101103573	JEQ12_018249	GO:0016570,GO:0006368,GO:0016593	histone modification|transcription elongation by RNA polymerase II|Cdc73/Paf1 complex								PF04004	Leo1	Leo1-like protein	IPR007149	Family
A0A6P3E695	JEQ12_000298	Uncharacterized protein	59.3799	A0A6P3E695;W5NZQ0	JEQ12_000298;LOC101106121	Uncharacterized protein;Cytochrome P450 4X1	3.65472e-14	45.4566	0.694786	-0.193001	0.433891	-1.27771	-1.89964	-1.3533	0.774753	0.574883	0.578799	-0.356165	0.739224	-1.70885	-0.287227	0.0715117	-2.21373	0.529138	-0.705154	-0.100284	-0.192499	-1.39584	0.137841	-1.15268	-0.422472	-0.364972	Uncharacterized protein	101106121	JEQ12_000298	GO:0016020,GO:0020037,GO:0005506,GO:0004497,GO:0016705	membrane|heme binding|iron ion binding|monooxygenase activity|oxidoreductase activity, acting on paired donors, with incorporation or reduction of molecular oxygen	oas04726	Serotonergic synapse	K07428					PF00067	p450	Cytochrome P450	IPR001128,IPR017972,IPR002401,IPR036396	Family|Conserved_site|Family|Homologous_superfamily
A0A6P3E6B4	JEQ12_018317	Exocyst complex component 5	81.8649	A0A6P3E6B4;W5QIX6	JEQ12_018317;EXOC5	Exocyst complex component 5	3.12466e-53	58.0747	0.748253	0.831627	0.868465	0.624016	0.968767	0.870044	0.766481	0.933343	0.953057	1.01141	1.14562	0.871096	0.833134	0.821046	1.07156	0.87942	0.865877	0.902154	0.774962	1.10414	1.0103	1.01752	0.997929	0.983563	Exocyst complex component 5	101121014	JEQ12_018317	GO:0005737	cytoplasm	oas05132	Salmonella infection	K19984					PF07393	Sec10	Exocyst complex component Sec10	IPR009976	Family
A0A6P3E6C5	PPP2R5E	Serine/threonine-protein phosphatase 2A 56 kDa regulatory subunit	54.6994	A0A6P3E6C5;A0A6P3TUR0	PPP2R5E;JEQ12_018365	Serine/threonine-protein phosphatase 2A 56 kDa regulatory subunit	9.72964e-31	51.6329	0.369215	0.742722	0.647489	0.650906	0.704891	0.734872	0.535893	0.543866	0.728094	0.341955	0.353787	0.620616	0.794992	0.635764	0.828603	0.590331	0.681325	0.602859	0.911379	0.503212	0.51326	0.791768	0.745605	0.47527	Serine/threonine-protein phosphatase 2A 56 kDa regulatory subunit	101107792	PPP2R5E	GO:0007165,GO:0000159,GO:0019888	signal transduction|protein phosphatase type 2A complex|protein phosphatase regulator activity	oas03015,oas04071,oas04151,oas04152,oas04110,oas04114,oas04261,oas04728,oas05165	mRNA surveillance pathway|Sphingolipid signaling pathway|PI3K-Akt signaling pathway|AMPK signaling pathway|Cell cycle|Oocyte meiosis|Adrenergic signaling in cardiomyocytes|Dopaminergic synapse|Human papillomavirus infection	K11584	KOG2085	Z	protein phosphatase regulator activity	Cytoskeleton	PF01603	B56	Protein phosphatase 2A regulatory B subunit (B56 family)	IPR011989,IPR016024,IPR002554	Homologous_superfamily|Homologous_superfamily|Family
A0A6P3E6D0	JEQ12_000381	Phosphatidic acid phosphatase type 2/haloperoxidase domain-containing protein	35.09	A0A6P3E6D0;W5PD88	JEQ12_000381;PLPP3	Phosphatidic acid phosphatase type 2/haloperoxidase domain-containing protein;Phospholipid phosphatase 3	1.46913e-22	48.8471	0.0315831	0.150157	0.00895828	0.0989929	-0.277851	0.230141	0.139085	0.288981	0.21608	0.396562	0.553673	0.318965	0.530234	-0.0631659	0.419971	0.246245	0.368471	0.15456	-0.185024	-0.0316249	0.129862	0.296008	0.351311	0.301438	Phosphatidic acid phosphatase type 2/haloperoxidase domain-containing protein	101102020	JEQ12_000381	GO:0006644,GO:0016020	phospholipid metabolic process|membrane	oas00561,oas00564,oas00565,oas00600,oas04072,oas04666,oas04975,oas05231	Glycerolipid metabolism|Glycerophospholipid metabolism|Ether lipid metabolism|Sphingolipid metabolism|Phospholipase D signaling pathway|Fc gamma R-mediated phagocytosis|Fat digestion and absorption|Choline metabolism in cancer	K01080					PF01569	PAP2	PAP2 superfamily	IPR036938,IPR000326,IPR043216	Homologous_superfamily|Domain|Family
A0A6P3E6D2	JEQ12_018391	Eukaryotic translation initiation factor 2 subunit 1	36.0941	A0A6P3E6D2;A0A6P3EBC0	JEQ12_018391;EIF2S1	Eukaryotic translation initiation factor 2 subunit 1	1.31478e-36	53.4882	2.47445	2.42809	2.42023	2.51388	2.64831	2.50633	2.55376	2.55123	2.64617	2.38832	2.40077	2.47523	2.52323	2.36715	2.48769	2.45329	2.56546	2.52655	2.496	2.52283	2.62446	2.55627	2.54957	2.49467	Eukaryotic translation initiation factor 2 subunit 1	101113414	JEQ12_018391	GO:0010494,GO:0031090,GO:0003723,GO:0003743	cytoplasmic stress granule|organelle membrane|RNA binding|translation initiation factor activity	oas04141,oas04140,oas04210,oas05160,oas05164,oas05162,oas05168,oas05010,oas05012,oas05014,oas05020,oas05022,oas05417,oas04932	Protein processing in endoplasmic reticulum|Autophagy - animal|Apoptosis|Hepatitis C|Influenza A|Measles|Herpes simplex virus 1 infection|Alzheimer disease|Parkinson disease|Amyotrophic lateral sclerosis|Prion disease|Pathways of neurodegeneration - multiple diseases|Lipid and atherosclerosis|Non-alcoholic fatty liver disease	K03237					PF07541,PF00575	EIF_2_alpha|S1	Eukaryotic translation initiation factor 2 alpha subunit|S1 RNA binding domain	IPR012340,IPR022967,IPR003029,IPR044126,IPR024055,IPR024054,IPR011488	Homologous_superfamily|Domain|Domain|Domain|Homologous_superfamily|Homologous_superfamily|Family
A0A6P3E6E8	NPC2	NPC intracellular cholesterol transporter 2	16.442	A0A6P3E6E8;A0A6P3TPJ2	NPC2;JEQ12_018467	NPC intracellular cholesterol transporter 2	4.98288e-15	45.8541	3.57992	3.73516	3.78648	4.08322	4.16979	4.19148	3.8685	4.42118	3.67954	3.72267	3.58723	3.97727	3.84511	3.90223	3.89567	3.69741	3.64356	4.08223	4.01661	4.25558	3.87737	4.05735	3.75988	3.9738	NPC intracellular cholesterol transporter 2	100037669	NPC2	GO:0032367,GO:0005576,GO:0032934	intracellular cholesterol transport|extracellular region|sterol binding	oas04142,oas04979	Lysosome|Cholesterol metabolism	K13443	KOG4063	P	intracellular cholesterol transport	Inorganic ion transport and metabolism	PF02221	E1_DerP2_DerF2	ML domain	IPR014756,IPR003172,IPR033916,IPR039670	Homologous_superfamily|Domain|Domain|Family
A0A6P3E6F5	JEQ12_018506	maleylacetoacetate isomerase	24.0376	A0A6P3E6F5;W5NWM7;W5NWN0	JEQ12_018506;GSTZ1;GSTZ1	maleylacetoacetate isomerase	7.99264e-24	49.2965	1.09931	1.2307	0.933617	1.3933	0.865435	1.23672	1.19294	1.22601	1.41834	1.0588	1.07866	1.28083	1.5543	1.22879	0.964174	1.35604	1.3371	1.09749	1.64864	0.952201	1.24665	1.07112	1.24131	1.02928	maleylacetoacetate isomerase	101113936	JEQ12_018506	GO:0006559,GO:0006572,GO:0005737,GO:0016034	L-phenylalanine catabolic process|tyrosine catabolic process|cytoplasm|maleylacetoacetate isomerase activity	oas00350	Tyrosine metabolism	K01800					PF14497,PF02798	GST_C_3|GST_N	Glutathione S-transferase, C-terminal domain|Glutathione S-transferase, N-terminal domain	IPR010987,IPR036282,IPR040079,IPR004045,IPR004046,IPR005955,IPR034330,IPR034333,IPR036249	Domain|Homologous_superfamily|Family|Domain|Domain|Family|Domain|Domain|Homologous_superfamily
A0A6P3E6F9	JEQ12_001241	Amyloid-beta A4 protein	86.9264	A0A6P3E6F9;W5Q0C6	JEQ12_001241;APP	Amyloid-beta A4 protein	2.52806e-37	53.7071	-0.414616	-0.189561	-0.223328	-0.290254	-0.242267	0.0718848	0.000658915	-0.134895	-0.041521	-0.133005	0.0205263	-0.641128	0.124212	-0.0789308	-0.168236	-0.13054	-0.18002	-0.057778	0.17758	-0.00934141	-0.2307	-0.194316	-0.212784	-0.055779	Amyloid-beta A4 protein	101111593	JEQ12_001241	GO:0006915,GO:0006897,GO:0007219,GO:0009986,GO:0005905,GO:0005769,GO:0005576,GO:0005794,GO:0005798,GO:0030426,GO:0005634,GO:0043204,GO:0008201,GO:0004867,GO:0046914	apoptotic process|endocytosis|Notch signaling pathway|cell surface|clathrin-coated pit|early endosome|extracellular region|Golgi apparatus|Golgi-associated vesicle|growth cone|nucleus|perikaryon|heparin binding|serine-type endopeptidase inhibitor activity|transition metal ion binding	oas04726,oas05010,oas05022	Serotonergic synapse|Alzheimer disease|Pathways of neurodegeneration - multiple diseases	K04520					PF10515,PF12924,PF12925,PF02177,PF03494,PF00014	APP_amyloid|APP_Cu_bd|APP_E2|APP_N|Beta-APP|Kunitz_BPTI	Beta-amyloid precursor protein C-terminus|Copper-binding of amyloid precursor, CuBD|E2 domain of amyloid precursor protein|Amyloid A4 N-terminal heparin-binding|Beta-amyloid peptide (beta-APP)|Kunitz/Bovine pancreatic trypsin inhibitor domain	IPR036669,IPR008155,IPR013803,IPR037071,IPR011178,IPR024329,IPR008154,IPR015849,IPR036454,IPR019745,IPR019543,IPR019744,IPR036176,IPR002223,IPR036880,IPR011993,IPR020901	Homologous_superfamily|Family|Domain|Homologous_superfamily|Domain|Domain|Domain|Domain|Homologous_superfamily|Conserved_site|Domain|Conserved_site|Homologous_superfamily|Domain|Homologous_superfamily|Homologous_superfamily|Conserved_site
A0A6P3E6G0	JEQ12_009694	Translin	26.1689	A0A6P3E6G0;W5PV21	JEQ12_009694;TSN	Translin	1.04804e-45	56.1165	3.22978	3.0484	3.09445	3.21941	3.02502	3.59932	2.95427	3.04842	3.37416	3.2201	3.11527	3.25088	2.99445	3.44375	3.0047	2.9714	3.03669	3.15347	2.86689	3.21587	3.19925	3.14731	3.24187	3.08599	Translin	101116021	JEQ12_009694	GO:0016070,GO:0005634,GO:0003723,GO:0043565,GO:0003697	RNA metabolic process|nucleus|RNA binding|sequence-specific DNA binding|single-stranded DNA binding								PF01997	Translin	Translin family	IPR033956,IPR016069,IPR002848,IPR016068,IPR036081	Family|Homologous_superfamily|Family|Homologous_superfamily|Homologous_superfamily
A0A6P3E6G7	JEQ12_009738	Uncharacterized protein	36.6589	A0A6P3E6G7;W5Q2T5	JEQ12_009738;TYW5	Uncharacterized protein;tRNA-yW synthesizing protein 5	8.50934e-12	44.3883	-0.187886	-2.77637	-0.926242	-3.47245	-0.722387	-0.672103	-1.58777	-0.705671	-0.868242	-0.448635	-0.733095	-0.558244	-0.740443	-1.308	-0.568963	-1.34182	-1.37763	-0.514079	-1.22372	-1.15294	-0.517949	-0.765511	-0.87111	-0.549893	Uncharacterized protein	101103128	JEQ12_009738										PF13621	Cupin_8	Cupin-like domain	IPR041667,IPR003347	Domain|Domain
A0A6P3E6I1	COQ6	Ubiquinone biosynthesis monooxygenase COQ6, mitochondrial	51.1684	A0A6P3E6I1;W5NRR4	COQ6	Ubiquinone biosynthesis monooxygenase COQ6, mitochondrial;Ubiquinone biosynthesis monooxygenase COQ6, mitochondrial	2.52331e-27	50.4984	-0.110378	0.588181	0.0202512	-0.0416368	0.217205	-0.0538243	-0.00112662	-0.0941763	-0.225341	-0.0337196	-0.0929747	-0.267114	-0.282257	-0.103761	-0.385146	-0.0186489	0.102121	0.0395624	-0.326748	-0.337936	-0.0262793	-0.0833433	-0.130319	-0.0731342	Ubiquinone biosynthesis monooxygenase COQ6, mitochondrial	101105664	COQ6	GO:0006744,GO:0042995,GO:0031314,GO:0005794,GO:0008681,GO:0071949,GO:0016709,GO:0016712	ubiquinone biosynthetic process|cell projection|extrinsic component of mitochondrial inner membrane|Golgi apparatus|2-octaprenyl-6-methoxyphenol hydroxylase activity|FAD binding|oxidoreductase activity, acting on paired donors, with incorporation or reduction of molecular oxygen, NAD(P)H as one donor, and incorporation of one atom of oxygen|oxidoreductase activity, acting on paired donors, with i…	oas00130	Ubiquinone and other terpenoid-quinone biosynthesis	K06126					PF01494	FAD_binding_3	FAD binding domain	IPR002938,IPR036188,IPR018168,IPR010971,IPR000689	Domain|Homologous_superfamily|Conserved_site|Family|Family
A0A6P3E6I9	JEQ12_001277	Uncharacterized protein	23.9646	A0A6P3E6I9;W5Q6A5	JEQ12_001277;CHMP2B	Uncharacterized protein;Charged multivesicular body protein 2B	0.00516069	27.7018	-0.79297					-0.571665		-1.14614			-0.750574			-0.902728	-0.981013	-0.390896				-1.83811		-0.545443	0.111277	-0.881294	Uncharacterized protein	101121224	JEQ12_001277	GO:0007034	vacuolar transport	oas04144,oas04217,oas05014,oas05022	Endocytosis|Necroptosis|Amyotrophic lateral sclerosis|Pathways of neurodegeneration - multiple diseases	K12192					PF03357	Snf7	Snf7	IPR005024	Family
A0A6P3E6K0	LOC101103178	Zinc finger Ran-binding domain-containing protein 2	37.3954	A0A6P3E6K0;A0A836AFR8;W5PJ65	LOC101103178;JEQ12_000453;	Zinc finger Ran-binding domain-containing protein 2	6.45284e-26	50.0206	1.15973	1.42332	1.16286	1.22036	1.34775	1.33096	1.10714	1.43612	1.50428	1.01934	1.18683	1.32532	-0.0725233	1.0468	1.18635	1.13167	1.14756	1.2311	0.751215	1.1772	1.40502	1.19889	1.09844	1.1168	Zinc finger Ran-binding domain-containing protein 2	101119088	LOC101103178	GO:0006396,GO:0005634,GO:0046872,GO:0003723	RNA processing|nucleus|metal ion binding|RNA binding				KOG1995	J	RNA binding	Translation, ribosomal structure and biogenesis	PF00641	zf-RanBP	Zn-finger in Ran binding protein and others	IPR001876,IPR036443,IPR017337	Domain|Homologous_superfamily|Family
A0A6P3E6K2	JEQ12_018655	Gap junction protein	43.0884	A0A6P3E6K2;W5QFD5	JEQ12_018655;GJA1	Gap junction protein	2.84353e-30	51.4794	2.29609	2.5917	2.83588	2.48514	2.84964	2.51817	2.59266	2.85338	2.6535	3.07315	2.47798	2.4424	2.75844	2.43786	2.60488	2.92149	2.61462	2.80918	2.64805	2.62775	2.45895	2.81902	2.97287	2.74485	Gap junction protein	101122284	JEQ12_018655	GO:0007267,GO:0007507,GO:0005922,GO:0005783,GO:0022857	cell-cell signaling|heart development|connexin complex|endoplasmic reticulum|transmembrane transporter activity	oas04540,oas05412	Gap junction|Arrhythmogenic right ventricular cardiomyopathy	K07372					PF00029,PF03508	Connexin|Connexin43	Connexin|Gap junction alpha-1 protein (Cx43)	IPR035091,IPR000500,IPR002261,IPR013124,IPR034634,IPR019570,IPR017990,IPR013092,IPR038359	Homologous_superfamily|Family|Family|Domain|Homologous_superfamily|Domain|Conserved_site|Domain|Homologous_superfamily
A0A6P3E6K5	JEQ12_017176	Phosphodiesterase	98.6846	A0A6P3E6K5;W5Q3B6;W5Q3B7	JEQ12_017176;PDE5A;PDE5A	Phosphodiesterase	8.12697e-23	48.9391	-2.6652	-2.85297	-2.32645	-3.82985	-2.32425	-2.43238	-2.83084	-2.77829	-2.69678	-2.82948	-3.12137	-2.72529	-2.10459	-2.8285	-2.66774	-1.92844	-2.65641	-2.62447	-3.39197	-2.37678	-2.38796	-2.77236	-3.85835	-2.98708	Phosphodiesterase	101109357	JEQ12_017176	GO:0007165,GO:0004114,GO:0046872	signal transduction|3',5'-cyclic-nucleotide phosphodiesterase activity|metal ion binding	oas00230,oas04022	Purine metabolism|cGMP-PKG signaling pathway	K13762					PF01590,PF00233	GAF|PDEase_I	GAF domain|3'5'-cyclic nucleotide phosphodiesterase	IPR003018,IPR029016,IPR003607,IPR023088,IPR002073,IPR036971,IPR023174	Domain|Homologous_superfamily|Domain|Family|Domain|Homologous_superfamily|Conserved_site
A0A6P3E6K7	JEQ12_000478	Uncharacterized protein	34.5435	A0A6P3E6K7;W5PV70;W5PV71	JEQ12_000478;GIPC2;GIPC2	Uncharacterized protein;GIPC PDZ domain containing family member 2;GIPC PDZ domain containing family member 2	2.69166e-05	40.4427	1.98607	-0.939757	1.21334	0.33518	-0.14074	1.38772	0.0853486	0.0873103	2.81697	0.758516	1.78677	1.42366	1.64997	0.726173	1.96681	2.01679	0.859377	1.22533	1.5527	1.14012	1.53077	1.92589	1.62486	1.68899	Uncharacterized protein	101102349	JEQ12_000478										PF00595	PDZ	PDZ domain	IPR017379,IPR001478,IPR036034	Family|Domain|Homologous_superfamily
A0A6P3E6K8	JEQ12_017182	N6-adenosine-methyltransferase non-catalytic subunit	52.1795	A0A6P3E6K8;W5Q720	JEQ12_017182;METTL14	N6-adenosine-methyltransferase non-catalytic subunit	9.10379e-31	51.6426	-2.23944	-2.32052	-2.43922	-2.79613	-2.45177	-2.3734	-2.58101	-2.04827	-2.38826	-2.70653	-2.05577	-2.24166	-2.38843	-2.44775	-2.14017	-2.23198	-3.27587	-2.56153	-2.97509	-2.83679	-2.07899	-2.27782	-2.37885	-2.73411	N6-adenosine-methyltransferase non-catalytic subunit	101110842	JEQ12_017182	GO:0021861,GO:0061157,GO:0080009,GO:0007283,GO:0019827,GO:0005634,GO:0036396,GO:0140640,GO:0003729,GO:0008757	forebrain radial glial cell differentiation|mRNA destabilization|mRNA methylation|spermatogenesis|stem cell population maintenance|nucleus|RNA N6-methyladenosine methyltransferase complex|catalytic activity, acting on a nucleic acid|mRNA binding|S-adenosylmethionine-dependent methyltransferase activity								PF05063	MT-A70	MT-A70	IPR045123,IPR007757,IPR029063	Family|Family|Homologous_superfamily
A0A6P3E6L1	JEQ12_009878	Uncharacterized protein	53.5318	A0A6P3E6L1;W5QG29	JEQ12_009878;DES	Uncharacterized protein;Desmin	1.50255e-40	54.6621	5.74637	5.67166	4.74406	5.14056	4.40216	5.1551	5.18827	5.49851	5.24518	5.16136	5.06763	5.23793	5.67892	4.88005	5.76451	5.41297	5.53095	5.39017	5.10576	5.23632	4.17962	5.28612	5.53855	5.41765	Uncharacterized protein	101117308	JEQ12_009878	GO:0005882	intermediate filament	oas05410,oas05412,oas05414	Hypertrophic cardiomyopathy|Arrhythmogenic right ventricular cardiomyopathy|Dilated cardiomyopathy	K07610					PF00038,PF04732	Filament|Filament_head	Intermediate filament protein|Intermediate filament head (DNA binding) region	IPR018039,IPR039008,IPR006821	Conserved_site|Domain|Domain
A0A6P3E6L7	JEQ12_009907	Uncharacterized protein	250.02	A0A6P3E6L7;W5QGV5	JEQ12_009907;DOCK10	Uncharacterized protein;Dedicator of cytokinesis 10	0.00318611	30.0959	-2.04658	-0.607278	-1.17869	0.0502632	-1.26807	-2.62535	-1.35241	-2.51166	-0.683296	-1.84975	-1.71827	-1.76754	-1.27183	-1.34016	-1.78651	-1.81682	-1.91631	-0.834534	-1.51329	-1.2895	-1.73488	-1.41278	-1.08277	-0.85136	Uncharacterized protein	101123187	JEQ12_009907	GO:0007264,GO:0005085	small GTPase mediated signal transduction|guanyl-nucleotide exchange factor activity								PF06920,PF20422,PF20421,PF14429,PF11878,PF00169	DHR-2_Lobe_A|DHR-2_Lobe_B|DHR-2_Lobe_C|DOCK-C2|DOCK_C-D_N|PH	DHR-2, Lobe A|DHR-2, Lobe B|DHR-2, Lobe C|C2 domain in Dock180 and Zizimin proteins|Dedicator of cytokinesis C/D, N terminal|PH domain	IPR016024,IPR037809,IPR027007,IPR035892,IPR026791,IPR021816,IPR043161,IPR043162,IPR027357,IPR046769,IPR046770,IPR046773,IPR011993,IPR001849	Homologous_superfamily|Domain|Domain|Homologous_superfamily|Family|Domain|Homologous_superfamily|Homologous_superfamily|Domain|Domain|Domain|Domain|Homologous_superfamily|Domain
A0A6P3E6M7	JEQ12_009973	Protein archease	19.4468	A0A6P3E6M7;W5QID8	JEQ12_009973;ZBTB8OS	Protein archease	1.93396e-05	40.6859	1.69752	1.84309	1.67771	1.50325	1.34488	1.58106	1.36016	1.524	1.63167	0.837037	1.00289	0.69886	1.28692	1.49943	1.08499	1.31165	1.23567	0.763246	0.601181	1.36946	1.58712	0.912178	1.11902	0.741613	Protein archease	101112630	JEQ12_009973	GO:0008033,GO:0046872	tRNA processing|metal ion binding								PF01951	Archease	Archease protein family (MTH1598/TM1083)	IPR002804,IPR023572,IPR036820	Family|Domain|Homologous_superfamily
A0A6P3E6M8	JEQ12_000516	Endophilin-B1	40.7662	A0A6P3E6M8;W5PZQ7;W5PZR0	JEQ12_000516;SH3GLB1;SH3GLB1	Endophilin-B1	3.21455e-29	51.1319	1.46363	0.788703	1.00505	1.44151	1.26001	1.17879	1.11372	1.19225	1.452	1.17979	1.4143	0.659876	1.60275	1.35492	1.14353	1.47474	0.848202	1.1071	1.37081	1.30528	1.40076	1.35729	1.74871	1.33135	Endophilin-B1	101116521	JEQ12_000516	GO:0006915,GO:0000421,GO:0000139,GO:0030496,GO:0005741	apoptotic process|autophagosome membrane|Golgi membrane|midbody|mitochondrial outer membrane	oas04144,oas04140	Endocytosis|Autophagy - animal	K11248					PF03114,PF14604	BAR|SH3_9	BAR domain|Variant SH3 domain	IPR027267,IPR004148,IPR036028,IPR001452,IPR035695	Homologous_superfamily|Domain|Homologous_superfamily|Domain|Domain
A0A6P3E6N0	FYN	Tyrosine-protein kinase	60.7178	A0A6P3E6N0	FYN	Tyrosine-protein kinase	6.24722e-12	44.4434	-0.26694	-0.400745	-0.0930503	-0.260424	-0.222737	-0.363364	-0.34047	-0.810157	-0.607784	-0.0689495	-0.679969	-0.724096	-1.11131	-0.381185	-0.365056	-0.76055	-0.673269	-0.358152	-1.10622	-0.813492	-0.484486	-0.118139	-0.290969	-0.251752	Tyrosine-protein kinase	101109363	FYN	GO:0002250,GO:0006468,GO:0005737,GO:0005886,GO:0005524,GO:0004715	adaptive immune response|protein phosphorylation|cytoplasm|plasma membrane|ATP binding|non-membrane spanning protein tyrosine kinase activity	oas04072,oas04071,oas04510,oas04520,oas04611,oas04650,oas04660,oas04664,oas04725,oas04360,oas04380,oas05020,oas05416	Phospholipase D signaling pathway|Sphingolipid signaling pathway|Focal adhesion|Adherens junction|Platelet activation|Natural killer cell mediated cytotoxicity|T cell receptor signaling pathway|Fc epsilon RI signaling pathway|Cholinergic synapse|Axon guidance|Osteoclast differentiation|Prion disease|Viral myocarditis	K05703	KOG0197	KLT	peptidyl-tyrosine autophosphorylation	Transcription|Replication, recombination and repair|Signal transduction mechanisms	PF07714,PF00017,PF00018	PK_Tyr_Ser-Thr|SH2|SH3_1	Protein tyrosine and serine/threonine kinase|SH2 domain|SH3 domain	IPR035750,IPR011009,IPR000719,IPR017441,IPR001245,IPR000980,IPR036860,IPR036028,IPR001452,IPR008266,IPR020635	Domain|Homologous_superfamily|Domain|Binding_site|Domain|Domain|Homologous_superfamily|Homologous_superfamily|Domain|Active_site|Domain
A0A6P3E6N3	JEQ12_000525	Transcription initiation factor IIB	34.8329	A0A6P3E6N3;W5Q027	JEQ12_000525;GTF2B	Transcription initiation factor IIB	6.80202e-28	50.6903	0.827013	0.899949	1.25028	1.27036	1.0981	1.01371	1.04144	1.11121	1.00858	1.16029	1.09846	1.30047	0.906469	0.984984	1.06679	1.01233	1.24764	1.23594	1.00004	0.666954	1.25413	1.0874	1.16187	1.29552	Transcription initiation factor IIB	101119003	JEQ12_000525	GO:0070897,GO:0004402,GO:0017025	transcription preinitiation complex assembly|histone acetyltransferase activity|TBP-class protein binding	oas03022,oas05203,oas05017	Basal transcription factors|Viral carcinogenesis|Spinocerebellar ataxia	K03124					PF08271,PF00382	TF_Zn_Ribbon|TFIIB	TFIIB zinc-binding|Transcription factor TFIIB repeat	IPR013763,IPR036915,IPR000812,IPR023486,IPR013150,IPR013137	Domain|Homologous_superfamily|Family|Conserved_site|Domain|Domain
A0A6P3E6P0	JEQ12_018720	F-actin monooxygenase	118.679	A0A6P3E6P0	JEQ12_018720	F-actin monooxygenase	1.61904e-29	51.2307	2.67881	2.69695	2.60864	2.77167	3.13632	2.84726	2.6873	2.55439	3.0315	2.78298	2.77635	2.97149	2.95755	2.92054	2.8837	2.9413	3.00967	2.69083	3.06056	2.81466	3.01521	2.86779	2.89561	2.79652	F-actin monooxygenase	101113940	JEQ12_018720	GO:0030042,GO:0005737,GO:0003779,GO:0071949,GO:0004497	actin filament depolymerization|cytoplasm|actin binding|FAD binding|monooxygenase activity								PF12130,PF00307,PF01494	bMERB_dom|CH|FAD_binding_3	Bivalent Mical/EHBP Rab binding domain|Calponin homology (CH) domain|FAD binding domain	IPR022735,IPR001715,IPR036872,IPR002938,IPR036188,IPR001781	Domain|Domain|Homologous_superfamily|Domain|Homologous_superfamily|Domain
A0A6P3E6P2	JEQ12_001359	Ubiquitin-like-conjugating enzyme ATG3	35.7663	A0A6P3E6P2;W5QDF2	JEQ12_001359;ATG3	Ubiquitin-like-conjugating enzyme ATG3	5.95819e-54	58.2522	0.188015	-0.203296	0.299153	0.655261	0.47638	0.606303	0.510115	0.193901	0.0424596	0.0276926	-0.342835	0.104873	0.219276	0.0746472	0.0868712	0.371522	0.405093	0.411209	0.664135	0.0106327	0.387626	0.439218	0.232348	0.298236	Ubiquitin-like-conjugating enzyme ATG3	101121560	JEQ12_001359	GO:0006914,GO:0005737,GO:0019776	autophagy|cytoplasm|Atg8 ligase activity	oas04140,oas04136,oas05167	Autophagy - animal|Autophagy - other|Kaposi sarcoma-associated herpesvirus infection	K08343					PF03987	Autophagy_act_C	Autophagocytosis associated protein, active-site domain	IPR046962,IPR007135	Family|Family
A0A6P3E6P4	GLMN	Glomulin, FKBP associated protein	67.6536	A0A6P3E6P4;A0A6P3TCK0	GLMN;JEQ12_000548	Glomulin, FKBP associated protein;Glomulin	8.99442e-34	52.609	-0.420399	-0.844421	-0.287203	-0.705527	-0.204605	-0.493282	-0.711269	-0.712875	-0.809672	-0.318715	-0.313375	-0.37155	-0.626256	-0.299931	-0.263271	-0.596627	-0.488444	-0.535483	-0.505714	-0.485729	-0.476591	-0.382948	-0.432277	-0.505123	Glomulin, FKBP associated protein	101103436	GLMN						ENOG502QQAV	S	hepatocyte growth factor receptor binding	Function unknown	PF08568	Kinetochor_Ybp2	Uncharacterised protein family, YAP/Alf4/glomulin	IPR019516,IPR013877	Family|Family
A0A6P3E6P8	JEQ12_000557	Protein Dr1	19.4437	A0A6P3E6P8;W5Q5L9	JEQ12_000557;DR1	Protein Dr1	2.09809e-06	41.7924	1.87758	2.05506	1.93145	2.06025	2.04512	2.31212	1.82182	1.86243	2.02604	2.09203	1.87255	1.73117	2.12983	2.09342	1.7607	2.03736	1.83183	1.70935	1.91847	1.82929	1.94934	2.18166	2.21802	1.97003	Protein Dr1	101105865	JEQ12_000557	GO:0000122,GO:0017054,GO:0003677,GO:0140223,GO:0046982	negative regulation of transcription by RNA polymerase II|negative cofactor 2 complex|DNA binding|general transcription initiation factor activity|protein heterodimerization activity								PF00808	CBFD_NFYB_HMF	Histone-like transcription factor (CBF/NF-Y) and archaeal histone	IPR003958,IPR009072,IPR042225	Domain|Homologous_superfamily|Family
A0A6P3E6Q3	JEQ12_001388	Uncharacterized protein	157.358	A0A6P3E6Q3	JEQ12_001388	Uncharacterized protein	8.23733e-13	44.8257	-2.85657	-2.45891	-2.19863	-2.45458	-2.53679	-2.52393	-2.5565	-2.23061	-2.95798	-2.66724	-2.55892	-2.25431	-2.54007	-2.41189	-2.09611	-2.90622	-2.21573	-2.63714	-2.82568	-3.05198	-2.73797	-2.58969	-2.78542	-2.16816	Uncharacterized protein	101105202	JEQ12_001388	GO:0007165	signal transduction								PF00620	RhoGAP	RhoGAP domain	IPR008936,IPR000198	Homologous_superfamily|Domain
A0A6P3E6Q4	JEQ12_000575	Uncharacterized protein	51.6224	A0A6P3E6Q4;W5Q820	JEQ12_000575;SNX7	Uncharacterized protein;Sorting nexin 7	4.09849e-05	40.1064	-1.53805	-1.96502	-1.45665	-2.02623	-1.45637	-1.52811	-2.10806	-1.48846	-1.55335	-1.33288	-1.27624	-2.27814	-1.80228	-1.64864	-1.94751	-1.88859	-2.1077	-1.90075	-1.6097	-1.71821	-1.51135	-1.24041	-1.96757	-1.87295	Uncharacterized protein	101109840	JEQ12_000575	GO:0015031,GO:0035091	protein transport|phosphatidylinositol binding								PF00787	PX	PX domain	IPR027267,IPR042131,IPR001683,IPR036871,IPR042130	Homologous_superfamily|Domain|Domain|Homologous_superfamily|Domain
A0A6P3E6Q7	JEQ12_017269	Uncharacterized protein	66.2457	A0A6P3E6Q7;W5Q4B7	JEQ12_017269;RAP1GDS1	Uncharacterized protein;Rap1 GTPase-GDP dissociation stimulator 1	6.61991e-26	50.0167	0.743451	0.614771	0.751771	0.6833	0.745266	0.624619	0.688431	0.81166	0.885831	0.995902	0.722158	0.719742	0.797055	0.586768	0.898054	0.638566	0.806422	0.818321	0.800152	0.846954	0.93746	0.82116	0.83308	0.637548	Uncharacterized protein	101113238	JEQ12_017269	GO:0043547,GO:0005829,GO:0005783,GO:0005739,GO:0005085	positive regulation of GTPase activity|cytosol|endoplasmic reticulum|mitochondrion|guanyl-nucleotide exchange factor activity								PF00514	Arm	Armadillo/beta-catenin-like repeat	IPR011989,IPR016024,IPR000225,IPR040144	Homologous_superfamily|Homologous_superfamily|Repeat|Family
A0A6P3E6S2	JEQ12_017308	Uncharacterized protein	169.893	A0A6P3E6S2	JEQ12_017308	Uncharacterized protein	2.48199e-15	45.99	-1.33722	-1.11705	-1.40592	-1.60525	-2.28527	-1.47602	-2.07406	-1.05651	-1.83311	-1.06697	-1.17165	-1.56486	-1.43678	-1.68509	-1.26709	-1.55638	-2.49998	-1.74221	-1.58081	-2.04516	-1.9254	-2.11332	-2.17092	-1.51325	Uncharacterized protein	100125611	JEQ12_017308	GO:0016043,GO:0007399,GO:0005576,GO:0005509	cellular component organization|nervous system development|extracellular region|calcium ion binding	oas04360	Axon guidance	K06839					PF00008,PF12661,PF00054,PF13855,PF01463,PF01462	EGF|hEGF|Laminin_G_1|LRR_8|LRRCT|LRRNT	EGF-like domain|Human growth factor-like EGF|Laminin G domain|Leucine rich repeat|Leucine rich repeat C-terminal domain|Leucine rich repeat N-terminal domain	IPR013320,IPR000483,IPR006207,IPR001881,IPR013032,IPR000742,IPR000152,IPR018097,IPR003645,IPR001791,IPR001611,IPR003591,IPR032675,IPR000372	Homologous_superfamily|Domain|Domain|Domain|Conserved_site|Domain|PTM|Conserved_site|Domain|Domain|Repeat|Repeat|Homologous_superfamily|Domain
A0A6P3E6S8	JEQ12_010135	Cell division control protein 42 homolog	21.2586	A0A6P3E6S8;M4WED3	JEQ12_010135;CDC42	Cell division control protein 42 homolog	3.11165e-28	50.8039	5.72512	5.81216	5.74109	5.91532	5.79095	6.17726	5.9585	5.97106	5.96195	5.82571	6.13142	5.88493	5.80213	5.94377	6.04777	5.95688	5.77709	6.01101	5.74488	5.86687	5.69584	5.90079	5.90858	6.04891	Cell division control protein 42 homolog	114108599	JEQ12_010135	GO:0009653,GO:0007163,GO:0051130,GO:0007264,GO:0005737,GO:0043227,GO:0030496,GO:0005886,GO:0005525,GO:0003924	anatomical structure morphogenesis|establishment or maintenance of cell polarity|positive regulation of cellular component organization|small GTPase mediated signal transduction|cytoplasm|membrane-bounded organelle|midbody|plasma membrane|GTP binding|GTPase activity	oas04010,oas04014,oas04015,oas04370,oas04144,oas04510,oas04520,oas04530,oas04810,oas04660,oas04666,oas04670,oas04062,oas04912,oas04722,oas04360,oas05200,oas05205,oas05203,oas05212,oas05211,oas05165,oas05132,oas05135,oas05100,oas05417,oas04932,oas04933	MAPK signaling pathway|Ras signaling pathway|Rap1 signaling pathway|VEGF signaling pathway|Endocytosis|Focal adhesion|Adherens junction|Tight junction|Regulation of actin cytoskeleton|T cell receptor signaling pathway|Fc gamma R-mediated phagocytosis|Leukocyte transendothelial migration|Chemokine signaling pathway|GnRH signaling pathway|Neurotrophin signaling pathway|Axon guidance|Pathways in can…	K04393					PF00071	Ras	Ras family	IPR037874,IPR027417,IPR005225,IPR001806,IPR003578	Family|Homologous_superfamily|Domain|Family|Family
A0A6P3E6T1	JEQ12_018815	5'-nucleotidase	63.2106	A0A6P3E6T1;W5PUV3	JEQ12_018815;NT5E	5'-nucleotidase	5.48218e-36	53.2986	1.98676	2.22653	2.25301	2.27469	2.08573	2.27734	2.16424	1.91385	2.19459	2.00561	2.40567	1.7175	2.28248	2.37985	2.09158	1.97516	1.92963	2.25601	2.45	1.98133	2.2265	2.49807	2.30009	2.39509	5'-nucleotidase	101116406	JEQ12_018815	GO:0009166,GO:0016020,GO:0046872,GO:0000166,GO:0106411	nucleotide catabolic process|membrane|metal ion binding|nucleotide binding|XMP 5'-nucleosidase activity	oas00230,oas00240,oas00760	Purine metabolism|Pyrimidine metabolism|Nicotinate and nicotinamide metabolism	K19970					PF02872,PF00149	5_nucleotid_C|Metallophos	5'-nucleotidase, C-terminal domain|Calcineurin-like phosphoesterase	IPR008334,IPR036907,IPR006146,IPR006179,IPR004843,IPR029052	Domain|Homologous_superfamily|Conserved_site|Family|Domain|Homologous_superfamily
A0A6P3E6T3	JEQ12_017324	Anaphase-promoting complex subunit 4	91.2642	A0A6P3E6T3;W5PB82	JEQ12_017324;ANAPC4	Anaphase-promoting complex subunit 4	2.34566e-29	51.1775	-1.19604	-0.562608	-0.489429	-0.680871	-0.407763	-0.949082	-0.618728	-0.878977	-0.702029	-0.724372	-0.575467	-0.925886	-0.977443	-0.621225	-1.0707	-0.75766	-0.694753	-0.978637	-1.32276	-0.859883	-0.571508	-0.902641	-0.87853	-1.01999	Anaphase-promoting complex subunit 4	101105914	JEQ12_017324	GO:0031145,GO:0007049,GO:0051301,GO:0070979,GO:0030071,GO:0005680	anaphase-promoting complex-dependent catabolic process|cell cycle|cell division|protein K11-linked ubiquitination|regulation of mitotic metaphase/anaphase transition|anaphase-promoting complex	oas04120,oas04110,oas04114,oas04914,oas05166	Ubiquitin mediated proteolysis|Cell cycle|Oocyte meiosis|Progesterone-mediated oocyte maturation|Human T-cell leukemia virus 1 infection	K03351					PF12896,PF12894	ANAPC4|ANAPC4_WD40	Anaphase-promoting complex, cyclosome, subunit 4|Anaphase-promoting complex subunit 4 WD40 domain	IPR024789,IPR024790,IPR017169,IPR024977,IPR015943,IPR036322	Family|Domain|Family|Domain|Homologous_superfamily|Homologous_superfamily
A0A6P3E6U0	RNF168	E3 ubiquitin-protein ligase RNF168	65.6994	A0A6P3E6U0;W5QGI9	RNF168	E3 ubiquitin-protein ligase RNF168	0.000100458	39.3422	-2.04669	-1.62291	-1.28113	-1.70569	-2.00712	-1.42277	-1.04648	-2.01398	-1.57583	-1.36075	-1.96236	-1.36799	-1.44506	-1.19958	-1.88604	-1.56847	-1.53165	-1.03357	-1.97475	-1.07802	-1.61998	-1.38759	-1.8726	-0.965058	E3 ubiquitin-protein ligase RNF168	101121991	RNF168	GO:0006325,GO:0006302,GO:0033522,GO:0045739,GO:0010212,GO:0005634,GO:0000151,GO:0003682,GO:0042393,GO:0046872,GO:0043130,GO:0004842	chromatin organization|double-strand break repair|histone H2A ubiquitination|positive regulation of DNA repair|response to ionizing radiation|nucleus|ubiquitin ligase complex|chromatin binding|histone binding|metal ion binding|ubiquitin binding|ubiquitin-protein transferase activity								PF00097	zf-C3HC4	Zinc finger, C3HC4 type (RING finger)	IPR034725,IPR018957,IPR001841,IPR013083	Family|Domain|Domain|Homologous_superfamily
A0A6P3E6U2	JEQ12_017355	WD repeat-containing protein 19	151.774	A0A6P3E6U2;A0A6P7E7W2	JEQ12_017355;WDR19	WD repeat-containing protein 19;WD repeat domain 19	6.18599e-07	42.1884	-1.18937	-1.83685	-1.96808	-2.38734	-1.80994	-2.37253	-1.54397	-2.57564	-1.09642	-1.76741	-2.09737	-2.41157	-2.04753	-2.24553	-1.82668	-1.33753	-2.18387	-2.0422	-2.31869	-2.79835	-2.00379	-2.05858	-1.91514	-2.38755	WD repeat-containing protein 19	101113150	JEQ12_017355	GO:0035721,GO:0005929	intraciliary retrograde transport|cilium								PF15911	WD40_3	WD domain, G-beta repeat	IPR011990,IPR015943,IPR001680,IPR040379,IPR039468	Homologous_superfamily|Homologous_superfamily|Repeat|Family|Repeat
A0A6P3E6U3	JEQ12_018840	Uncharacterized protein	29.6564	A0A6P3E6U3;W5PY17	JEQ12_018840;STX7	Uncharacterized protein;Syntaxin 7	4.13896e-25	49.7434	2.94391	2.72754	2.61399	2.49883	2.26426	3.02674	2.52229	2.46788	2.95198	2.14655	2.42746	2.74878	2.92836	2.76045	2.48749	2.95579	2.61872	2.41431	2.87994	2.98244	2.53231	2.89224	2.90359	2.61479	Uncharacterized protein	101123563	JEQ12_018840	GO:0006886,GO:0016192,GO:0016020,GO:0005484	intracellular protein transport|vesicle-mediated transport|membrane|SNAP receptor activity	oas04130,oas04145	SNARE interactions in vesicular transport|Phagosome	K08488					PF05739,PF14523	SNARE|Syntaxin_2	SNARE domain|Syntaxin-like protein	IPR010989,IPR045242,IPR006012,IPR006011,IPR000727	Homologous_superfamily|Family|Conserved_site|Domain|Domain
A0A6P3E6U6	JEQ12_001460	Nuclear cap-binding protein subunit 2	18.0011	A0A6P3E6U6;W5QGM3	JEQ12_001460;NCBP2	Nuclear cap-binding protein subunit 2	3.55166e-21	48.3447	0.329237	0.435033	0.48504	-0.0618828	0.0193663	0.224312	0.22605	0.234885	0.59306	-0.294651	-0.0454738	-0.262384	0.778393	-0.608138	-0.196674	-0.378001	-0.198231	-0.100932	0.843777	0.0942411	0.168398	-0.425699	-0.112798	-0.461053	Nuclear cap-binding protein subunit 2	101102358	JEQ12_001460	GO:0045292,GO:0005846,GO:0005634,GO:0000339	mRNA cis splicing, via spliceosome|nuclear cap binding complex|nucleus|RNA cap binding	oas03040,oas03013,oas03015	Spliceosome|Nucleocytoplasmic transport|mRNA surveillance pathway	K12883					PF00076	RRM_1	RNA recognition motif. (a.k.a. RRM, RBD, or RNP domain)	IPR027157,IPR034148,IPR012677,IPR035979,IPR000504	Family|Domain|Homologous_superfamily|Homologous_superfamily|Domain
A0A6P3E6V1	JEQ12_010055	GPN-loop GTPase 2	34.5206	A0A6P3E6V1	JEQ12_010055	GPN-loop GTPase 2	3.00501e-13	45.0277	-0.363345	0.252085	-0.30352	-0.532638	-0.446716	-0.386856	-0.558312	-0.689723	-0.646684	-0.00856729	-0.122199	-0.850122	-0.637779	-0.485023	-0.143422	-0.328201	-0.899232	-0.451776	-0.302872	-0.441989	-0.519163	-0.416884	-0.663498	-0.819418	GPN-loop GTPase 2	101114759	JEQ12_010055	GO:0005525,GO:0016787	GTP binding|hydrolase activity								PF03029	ATP_bind_1	Conserved hypothetical ATP binding protein	IPR004130,IPR030231,IPR027417	Family|Family|Homologous_superfamily
A0A6P3E6V2	JEQ12_017376	Proton-coupled zinc antiporter SLC30A9, mitochondrial	63.1857	A0A6P3E6V2;W5PX15	JEQ12_017376;SLC30A9	Proton-coupled zinc antiporter SLC30A9, mitochondrial;Proton-coupled zinc antiporter SLC30A9, mitochondrial	7.73653e-15	45.7674	-0.242642	-0.505681	-0.512098	-0.275055	-0.445628	-0.54039	-0.381865	-0.372969	-0.459483	-0.833788	-0.520269	-0.290691	-0.298758	-0.576756	-0.480369	-0.569489	-0.0406319	-0.376823	-0.305749	-0.34841	-0.32297	-0.339494	-0.487698	-0.590175	Proton-coupled zinc antiporter SLC30A9, mitochondrial	101118788	JEQ12_017376	GO:0006829,GO:0031410,GO:0005783,GO:0016020,GO:0005634,GO:0008324	zinc ion transport|cytoplasmic vesicle|endoplasmic reticulum|membrane|nucleus|monoatomic cation transmembrane transporter activity								PF01545	Cation_efflux	Cation efflux family	IPR002524,IPR027469,IPR009061,IPR040177,IPR037129	Family|Homologous_superfamily|Homologous_superfamily|Family|Homologous_superfamily
A0A6P3E6V3	JEQ12_000678	Uncharacterized protein	92.4989	A0A6P3E6V3	JEQ12_000678	Uncharacterized protein	9.33165e-15	45.7303	-0.940123	-0.815591	-0.51829	-1.02246	-0.89723	-1.03021	-1.09297	-1.04433	-1.21248	-0.823224	-1.00266	-1.0401	-1.05746	-1.02391	-0.711262	-1.03182	-0.846661	-0.822262	-0.693356	-1.20682	-0.840304	-1.00379	-1.02296	-0.933093	Uncharacterized protein	101115665	JEQ12_000678	GO:0005524,GO:0003676,GO:0003724	ATP binding|nucleic acid binding|RNA helicase activity								PF00270,PF00271	DEAD|Helicase_C	DEAD/DEAH box helicase|Helicase conserved C-terminal domain	IPR011545,IPR014001,IPR001650,IPR027417,IPR000629,IPR014014	Domain|Domain|Domain|Homologous_superfamily|Conserved_site|Domain
A0A6P3E6V8	JEQ12_001510	Cystatin kininogen-type domain-containing protein	48.6903	A0A6P3E6V8;W5QH45	JEQ12_001510;KNG1	Cystatin kininogen-type domain-containing protein;Kininogen 1	4.48683e-28	50.7511	6.96297	6.85816	6.43612	6.44968	5.98214	6.4092	6.02057	6.54845	5.79682	6.23649	5.9105	7.08076	6.57629	6.54513	7.05747	6.46931	6.39749	6.30473	6.70071	6.87037	6.08607	5.98768	6.45988	6.58122	Cystatin kininogen-type domain-containing protein	101112781	JEQ12_001510	GO:0042311,GO:0005615,GO:0004869	vasodilation|extracellular space|cysteine-type endopeptidase inhibitor activity	oas04071,oas04022,oas04080,oas04810,oas04610,oas04750,oas05200,oas05142,oas05143	Sphingolipid signaling pathway|cGMP-PKG signaling pathway|Neuroactive ligand-receptor interaction|Regulation of actin cytoskeleton|Complement and coagulation cascades|Inflammatory mediator regulation of TRP channels|Pathways in cancer|Chagas disease|African trypanosomiasis	K03898					PF00031	Cystatin	Cystatin domain	IPR000010,IPR046350,IPR027358,IPR018073	Domain|Homologous_superfamily|Domain|Conserved_site
A0A6P3E6V9	JEQ12_000685	RNA helicase	113.684	A0A6P3E6V9;W5QEP6	JEQ12_000685;MOV10	RNA helicase	3.5032e-52	57.8134	-1.10404	-1.31431	-0.693934	-0.769549	-0.702368	-1.04436	-0.388208	-0.773141	-1.08198	-0.50124	-0.633231	-0.962617	-0.661795	-0.841864	-0.599008	-0.841931	-0.474117	-0.779561	-0.894686	-0.979489	-0.407795	-0.778862	-0.594474	-0.507316	RNA helicase	101117713	JEQ12_000685	GO:0000932,GO:0032574,GO:0003723	P-body|5'-3' RNA helicase activity|RNA binding								PF13087,PF13604	AAA_12|AAA_30	AAA domain|AAA domain	IPR041679,IPR027417	Domain|Homologous_superfamily
A0A6P3E6W1	OCIAD1	OCIA domain-containing protein 1	27.8552	A0A6P3E6W1	OCIAD1	OCIA domain-containing protein 1	2.5752e-31	51.8216	2.3062	2.28454	2.44605	2.51292	2.26926	2.34314	2.30016	2.56881	2.46518	2.27525	2.34861	2.46825	2.46707	2.47285	2.35637	2.30145	2.36136	2.45275	2.52511	2.30483	2.35146	2.54141	2.41808	2.4241	OCIA domain-containing protein 1	101103237	OCIAD1	GO:2000736,GO:0005768	regulation of stem cell differentiation|endosome				ENOG502RXQR	S	regulation of stem cell differentiation	Function unknown	PF07051	OCIA	Ovarian carcinoma immunoreactive antigen (OCIA)	IPR040187,IPR009764	Family|Domain
A0A6P3E6W2	JEQ12_001515	Diacylglycerol kinase	88.7448	A0A6P3E6W2;W5QH74;W5QH75	JEQ12_001515;DGKG;DGKG	Diacylglycerol kinase	0.00194219	33.2006	-2.54695	-2.58515	-2.5109	-2.68351	-2.30885	-0.411593	-2.47368	-2.04494	-0.693533	-0.0952295	-0.28153	-0.879174	-0.467253	-0.781112	-0.713539	-0.379392	-2.41667	-1.48187	-1.0022	-2.40423	-1.85153	-0.249482	-0.30138	-0.451161	Diacylglycerol kinase	101114659	JEQ12_001515	GO:0046486,GO:0007205,GO:0005524,GO:0005509,GO:0004143	glycerolipid metabolic process|protein kinase C-activating G protein-coupled receptor signaling pathway|ATP binding|calcium ion binding|diacylglycerol kinase activity	oas00561,oas00564,oas04070,oas04072,oas05231	Glycerolipid metabolism|Glycerophospholipid metabolism|Phosphatidylinositol signaling system|Phospholipase D signaling pathway|Choline metabolism in cancer	K00901					PF00130,PF14513,PF00609,PF00781,PF13499	C1_1|DAG_kinase_N|DAGK_acc|DAGK_cat|EF-hand_7	Phorbol esters/diacylglycerol binding domain (C1 domain)|Diacylglycerol kinase N-terminus|Diacylglycerol kinase accessory domain|Diacylglycerol kinase catalytic domain|EF-hand domain pair	IPR017438,IPR046349,IPR029477,IPR037607,IPR038199,IPR000756,IPR001206,IPR011992,IPR018247,IPR002048,IPR016064,IPR002219	Homologous_superfamily|Homologous_superfamily|Domain|Family|Homologous_superfamily|Domain|Domain|Homologous_superfamily|Binding_site|Domain|Homologous_superfamily|Domain
A0A6P3E6X1	JEQ12_001535	DNA-directed RNA polymerases I, II, and III subunit RPABC3	17.1433	A0A6P3E6X1;W5QHC1	JEQ12_001535;POLR2H	DNA-directed RNA polymerases I, II, and III subunit RPABC3;DNA-directed RNA polymerases I, II, and III subunit RPABC3	5.76461e-19	47.5059	0.217801	0.954366	0.644965	0.83125	0.78379	0.681364	0.6981	1.20576	0.574932	1.08979	0.782105	0.49277	0.164627	0.617098	0.763683	0.439271	0.566536	1.04652	0.255134	0.813353	0.953796	0.515674	0.648271	0.653682	DNA-directed RNA polymerases I, II, and III subunit RPABC3	101119867	JEQ12_001535	GO:0006351,GO:0031090,GO:0005736,GO:0005665,GO:0005666	DNA-templated transcription|organelle membrane|RNA polymerase I complex|RNA polymerase II, core complex|RNA polymerase III complex	oas03020,oas03420,oas04623,oas05016	RNA polymerase|Nucleotide excision repair|Cytosolic DNA-sensing pathway|Huntington disease	K03016					PF03870	RNA_pol_Rpb8	RNA polymerase Rpb8	IPR012340,IPR005570	Homologous_superfamily|Family
A0A6P3E6X2	JEQ12_017441	DNA-directed RNA polymerase subunit beta	133.867	A0A6P3E6X2;W5P6A2	JEQ12_017441;POLR2B	DNA-directed RNA polymerase subunit beta	1.11463e-33	52.5796	1.09458	1.15136	1.63471	1.52043	1.58511	1.61167	1.58992	1.24453	1.27689	1.63902	1.35612	1.25805	1.49254	1.47199	1.56193	1.50783	1.5999	1.61589	1.29278	1.34161	1.42397	1.55255	1.62707	1.60354	DNA-directed RNA polymerase subunit beta	101111368	JEQ12_017441	GO:0006351,GO:0000428,GO:0003677,GO:0003899,GO:0046872,GO:0032549	DNA-templated transcription|DNA-directed RNA polymerase complex|DNA binding|DNA-directed 5'-3' RNA polymerase activity|metal ion binding|ribonucleoside binding	oas03020,oas03420,oas05016	RNA polymerase|Nucleotide excision repair|Huntington disease	K03010					PF04563,PF04561,PF04565,PF04566,PF04567,PF00562,PF04560	RNA_pol_Rpb2_1|RNA_pol_Rpb2_2|RNA_pol_Rpb2_3|RNA_pol_Rpb2_4|RNA_pol_Rpb2_5|RNA_pol_Rpb2_6|RNA_pol_Rpb2_7	RNA polymerase beta subunit|RNA polymerase Rpb2, domain 2|RNA polymerase Rpb2, domain 3|RNA polymerase Rpb2, domain 4|RNA polymerase Rpb2, domain 5|RNA polymerase Rpb2, domain 6|RNA polymerase Rpb2, domain 7	IPR015712,IPR007120,IPR037033,IPR007121,IPR007644,IPR007642,IPR037034,IPR007645,IPR007646,IPR007647,IPR007641,IPR014724	Family|Domain|Homologous_superfamily|Conserved_site|Domain|Domain|Homologous_superfamily|Domain|Domain|Domain|Domain|Homologous_superfamily
A0A6P3E6X9	JEQ12_018884	Uncharacterized protein	22.8694	A0A6P3E6X9;W5NRM2	JEQ12_018884;HEBP2	Uncharacterized protein;Heme binding protein 2	7.39202e-26	50.0002	0.508552	0.834169	0.713946	-0.0116317	1.39305	1.17363	0.939813	0.616932	0.54062	0.863103	1.44531	0.568304	-1.57197	-0.869143	0.0608576	-1.79446	0.569079	0.479952	0.525997	0.47526	0.0358254	0.332262	0.410435	0.116445	Uncharacterized protein	101114199	JEQ12_018884	GO:0110165	cellular anatomical entity								PF04832	SOUL	SOUL heme-binding protein	IPR011256,IPR006917	Homologous_superfamily|Family
A0A6P3E6Y0	JEQ12_000717	Uncharacterized protein	38.2263	A0A6P3E6Y0;W5QG93	JEQ12_000717;CD2	Uncharacterized protein;CD2 molecule	8.73323e-17	46.6202	-1.0177	-1.12484	-1.03745	-0.746842	-0.690756	-0.539933	-0.760124	0.349307	-0.255192	-0.457473	-0.28218	-0.877218	-0.417062	-0.553765	-0.3855	-1.00681	-0.481043	-0.219164	-0.771818	-0.850582	-0.628518	-0.456257	-0.866793	-0.695347	Uncharacterized protein	101106727	JEQ12_000717	GO:0005886	plasma membrane	oas04514,oas04640	Cell adhesion molecules|Hematopoietic cell lineage	K06449								IPR015632,IPR036179,IPR013783	Family|Homologous_superfamily|Homologous_superfamily
A0A6P3E6Y6	JEQ12_000724	Uncharacterized protein	106.41	A0A6P3E6Y6;W5QGH9	JEQ12_000724;WDR3	Uncharacterized protein;WD repeat domain 3	8.50202e-30	51.3231	-0.524784	-0.166576	0.062087	-0.357923	0.0671039	-0.206794	-0.238007	-0.316227	-0.407355	0.0615541	-0.296328	-0.789861	-0.140022	-0.0907187	-0.167022	-0.152704	-0.371026	-0.236804	-0.152037	-0.283584	-0.123666	-0.238738	-0.191293	-0.188721	Uncharacterized protein	101109229	JEQ12_000724	GO:0005730	nucleolus	oas03008	Ribosome biogenesis in eukaryotes	K14556					PF12894,PF04003,PF00400	ANAPC4_WD40|Utp12|WD40	Anaphase-promoting complex subunit 4 WD40 domain|Dip2/Utp12 Family|WD domain, G-beta repeat	IPR024977,IPR020472,IPR011041,IPR011047,IPR007148,IPR015943,IPR001680,IPR019775	Domain|Repeat|Homologous_superfamily|Homologous_superfamily|Domain|Homologous_superfamily|Repeat|Conserved_site
A0A6P3E6Z5	FMO5	Flavin-containing monooxygenase	60.3748	A0A6P3E6Z5;A0A6P3TMZ8;W5QH53	FMO5;JEQ12_000755;FMO5	Flavin-containing monooxygenase	2.69856e-29	51.1574	0.500812	0.958839	0.910953	0.824549	0.586334	0.942998	0.831977	0.87045	0.824331	0.948833	1.02264	1.23199	0.364567	0.934934	0.897494	0.956966	0.127346	0.986987	0.943763	0.396083	0.850278	0.744201	0.902426	1.14435	Flavin-containing monooxygenase	101113713	FMO5	GO:0006629,GO:0005789,GO:0050660,GO:0047822,GO:0004499,GO:0016174,GO:0050661	lipid metabolic process|endoplasmic reticulum membrane|flavin adenine dinucleotide binding|hypotaurine dehydrogenase activity|N,N-dimethylaniline monooxygenase activity|NAD(P)H oxidase H2O2-forming activity|NADP binding	oas00430,oas00982	Taurine and hypotaurine metabolism|Drug metabolism - cytochrome P450	K00485					PF00743	FMO-like	Flavin-binding monooxygenase-like	IPR036188,IPR000960,IPR020946,IPR002257	Homologous_superfamily|Family|Family|Family
A0A6P3E6Z6	JEQ12_018914	Uncharacterized protein	123.466	A0A6P3E6Z6;W5NWF1;W5NWF2	JEQ12_018914;STXBP5;STXBP5	Uncharacterized protein;Syntaxin binding protein 5;Syntaxin binding protein 5	1.13277e-28	50.9504	-1.15821	-0.93856	-0.782215	-0.944046	-0.967121	-0.796713	-1.12452	-1.05492	-1.27035	-0.759588	-0.930038	-1.0351	-0.857472	-1.24046	-0.552736	-0.579309	-1.29632	-0.71844	-0.894332	-0.593354	-1.59379	-1.0674	-0.996172	-0.678827	Uncharacterized protein	101121429	JEQ12_018914	GO:0006887,GO:0005737,GO:0005886	exocytosis|cytoplasm|plasma membrane								PF08596,PF08366,PF00400	Lgl_C|LLGL|WD40	Lethal giant larvae(Lgl) like, C-terminal|LLGL2|WD domain, G-beta repeat	IPR000664,IPR013905,IPR013577,IPR042855,IPR015943,IPR001680,IPR036322	Family|Domain|Domain|Domain|Homologous_superfamily|Repeat|Homologous_superfamily
A0A6P3E6Z9	JEQ12_018927	Uncharacterized protein	42.0017	A0A6P3E6Z9;W5NXX3	JEQ12_018927;NUP43	Uncharacterized protein;Nucleoporin 43	7.43608e-30	51.3424	0.09201	0.808832	0.592621	0.546104	0.449484	0.500704	0.584632	0.45385	0.371311	0.249521	0.435269	0.610704	0.751903	0.364015	0.511451	0.445027	0.593121	0.514932	0.360852	0.236361	0.75482	0.540473	0.454581	0.502961	Uncharacterized protein	101123306	JEQ12_018927			oas03013,oas05014	Nucleocytoplasmic transport|Amyotrophic lateral sclerosis	K14305					PF00400	WD40	WD domain, G-beta repeat	IPR015943,IPR001680,IPR019775,IPR036322	Homologous_superfamily|Repeat|Conserved_site|Homologous_superfamily
A0A6P3E701	JEQ12_013631	PID domain-containing protein	21.7295	A0A6P3E701;W5Q063	JEQ12_013631;ITGB1BP1	PID domain-containing protein;Integrin subunit beta 1 binding protein 1	5.1522e-25	49.7104	-0.490545	-0.762455	-1.26638	-1.43047	-0.968854	-1.38415	-0.999955	-0.901724	-1.43857	-0.944294	-1.10854	-1.0904	-0.733912	-1.22127	-0.704603	-1.30376	-0.545761	-0.975192	-1.281	-0.808966	-1.30864	-1.49166	-1.03197	-0.756426	PID domain-containing protein	101116297	JEQ12_013631										PF10480	ICAP-1_inte_bdg	Beta-1 integrin binding protein	IPR019517,IPR006020	Family|Domain
A0A6P3E703	JEQ12_017522	Protein SDA1	79.8261	A0A6P3E703;W5Q3Y2	JEQ12_017522;SDAD1	Protein SDA1	3.01775e-34	52.7592	-1.19334	-1.60295	-1.05235	-1.08768	-1.05747	-1.14727	-1.24764	-1.28638	-0.980479	-1.01354	-1.05272	-1.3371	-1.05701	-0.928533	-1.22742	-1.05331	-1.57632	-1.18848	-1.3782	-1.37924	-0.946256	-1.18493	-1.13322	-0.887277	Protein SDA1	101107964	JEQ12_017522	GO:0015031,GO:0042273,GO:0000055,GO:0005730	protein transport|ribosomal large subunit biogenesis|ribosomal large subunit export from nucleus|nucleolus								PF08158,PF05285	NUC130_3NT|SDA1	NUC130/3NT domain|SDA1	IPR016024,IPR027312,IPR007949,IPR012977	Homologous_superfamily|Family|Domain|Domain
A0A6P3E708	JEQ12_000776	Arrestin C-terminal-like domain-containing protein	43.6602	A0A6P3E708;W5QHK1	JEQ12_000776;TXNIP	Arrestin C-terminal-like domain-containing protein;Thioredoxin interacting protein	2.9094e-24	49.4494	0.515236	0.121401	0.494312	0.608639	0.646529	1.03037	0.579562	0.46727	0.519983	0.515624	0.832039	0.59571	0.453716	0.61972	0.755847	0.417401	0.500176	0.683296	0.535688	1.02826	0.766825	0.584016	0.245232	0.665095	Arrestin C-terminal-like domain-containing protein	654403	JEQ12_000776			oas04621	NOD-like receptor signaling pathway	K20910					PF02752,PF00339	Arrestin_C|Arrestin_N	Arrestin (or S-antigen), C-terminal domain|Arrestin (or S-antigen), N-terminal domain	IPR014752,IPR011021,IPR011022,IPR014756	Homologous_superfamily|Domain|Domain|Homologous_superfamily
A0A6P3E713	JEQ12_013675	Uncharacterized protein	16.7407	A0A6P3E713;W5Q667	JEQ12_013675;TTC32	Uncharacterized protein;Tetratricopeptide repeat domain 32	5.57261e-13	44.9033		-3.40711	-4.52024	-4.34727	-2.88221	-3.88961	-4.14783	-4.30938	-2.55573	-4.27736	-4.61658	-4.38043	-4.55349	-4.43309	-3.63351	-3.85901				-1.98276	-2.71373	-4.37635	-2.97365	-4.33688	Uncharacterized protein	101102886	JEQ12_013675										PF00515,PF13432	TPR_1|TPR_16	Tetratricopeptide repeat|Tetratricopeptide repeat	IPR011990,IPR001440,IPR019734	Homologous_superfamily|Repeat|Repeat
A0A6P3E720	JEQ12_000801	Uncharacterized protein	65.119	A0A6P3E720	JEQ12_000801	Uncharacterized protein	8.07245e-40	54.4496	1.33649	1.51181	1.46819	1.45404	1.74434	1.61864	1.5474	1.53367	1.58762	1.62593	1.6301	1.37622	1.5727	1.41182	1.75045	1.633	1.38562	1.49417	1.28426	1.46831	1.53006	1.82507	1.63201	1.62476	Uncharacterized protein	101102352	JEQ12_000801	GO:0015031,GO:0016192	protein transport|vesicle-mediated transport	oas04144	Endocytosis	K12479					PF00995	Sec1	Sec1 family	IPR043154,IPR043127,IPR001619,IPR027482,IPR036045	Homologous_superfamily|Homologous_superfamily|Family|Homologous_superfamily|Homologous_superfamily
A0A6P3E722	JEQ12_019047	Proteasome subunit beta	26.3621	A0A6P3E722;W5P500	JEQ12_019047;PSMB1	Proteasome subunit beta	4.44011e-22	48.6741	4.53556	4.44449	4.41437	4.4726	4.52954	4.67577	4.55678	4.50352	4.4625	4.177	4.47258	4.63848	4.46547	4.63991	4.49538	4.53862	4.53851	4.40041	4.66614	4.66702	4.73392	4.6054	4.54474	4.68715	Proteasome subunit beta	101116408	JEQ12_019047	GO:0051603,GO:0005737,GO:0005634,GO:0005839	proteolysis involved in protein catabolic process|cytoplasm|nucleus|proteasome core complex	oas03050,oas05010,oas05012,oas05014,oas05016,oas05017,oas05020,oas05022	Proteasome|Alzheimer disease|Parkinson disease|Amyotrophic lateral sclerosis|Huntington disease|Spinocerebellar ataxia|Prion disease|Pathways of neurodegeneration - multiple diseases	K02732					PF00227	Proteasome	Proteasome subunit	IPR029055,IPR016050,IPR001353,IPR023333	Homologous_superfamily|Conserved_site|Family|Family
A0A6P3E725	MRPS21	Mitochondrial ribosomal protein S21	10.6755	A0A6P3E725	MRPS21	Mitochondrial ribosomal protein S21	8.08808e-15	45.7585	-2.67627	-1.47607	-3.64076	-2.32297	-2.33384	-4.04525	-1.9139	-2.7582	-2.1758	-3.07498	-2.70657	-1.88675	-1.89557	-3.33348	-3.5246	-1.2522	-2.86412	-2.23829	-1.97406	-2.56704	-2.34589	-3.12839	-1.92291	-2.58243	Mitochondrial ribosomal protein S21	101104105	MRPS21	GO:0006412,GO:1990904,GO:0005840,GO:0003735	translation|ribonucleoprotein complex|ribosome|structural constituent of ribosome	oas03010	Ribosome	K02970	ENOG502S4BS	S	ribosomal protein S21	Function unknown	PF01165	Ribosomal_S21	Ribosomal protein S21	IPR001911,IPR038380	Family|Homologous_superfamily
A0A6P3E726	JEQ12_013733	Prolactin regulatory element-binding protein	45.8026	A0A6P3E726;W5QCW4	JEQ12_013733;PREB	Prolactin regulatory element-binding protein	2.66292e-27	50.4904	1.10975	1.88703	1.37632	1.22102	1.56535	1.23893	1.59444	1.5897	1.18219	1.35056	1.35495	1.41623	1.52774	0.995481	1.41827	1.13897	1.40134	1.47781	1.29704	1.4361	1.65855	1.43838	1.29212	1.3893	Prolactin regulatory element-binding protein	101114090	JEQ12_013733	GO:0006888,GO:0009306,GO:0003400,GO:0005789,GO:0005634,GO:0005096,GO:0005085	endoplasmic reticulum to Golgi vesicle-mediated transport|protein secretion|regulation of COPII vesicle coating|endoplasmic reticulum membrane|nucleus|GTPase activator activity|guanyl-nucleotide exchange factor activity	oas04141	Protein processing in endoplasmic reticulum	K14003					PF00400	WD40	WD domain, G-beta repeat	IPR011047,IPR045260,IPR015943,IPR001680	Homologous_superfamily|Family|Homologous_superfamily|Repeat
A0A6P3E736	JEQ12_001688	Alpha/beta hydrolase fold-3 domain-containing protein	48.0083	A0A6P3E736;W5P0X1	JEQ12_001688;LOC101115927	Alpha/beta hydrolase fold-3 domain-containing protein;Arylacetamide deacetylase-like	0.000438417	37.6074	-2.46725	-1.79492	-1.74159	-1.99627	-1.80372	-1.24748	-2.21623	-1.54995	-1.00355	-2.5379	-1.40168	-1.37547	-1.788	-1.54234	-0.0166594	-1.61308	-1.5039	-1.84303	-2.3953	-2.17075	-1.44104	-1.74818	-1.50917	-1.06346	Alpha/beta hydrolase fold-3 domain-containing protein	101115927	JEQ12_001688	GO:0016020,GO:0052689	membrane|carboxylic ester hydrolase activity								PF07859	Abhydrolase_3	alpha/beta hydrolase fold	IPR029058,IPR013094,IPR017157,IPR002168	Homologous_superfamily|Domain|Family|Active_site
A0A6P3E738	JEQ12_013757	BRISC and BRCA1-A complex member 2	43.5607	A0A6P3E738;A0A6P7DVI7	JEQ12_013757;BABAM2	BRISC and BRCA1-A complex member 2	1.36627e-36	53.483	0.876835	1.04367	1.18079	1.1307	1.02332	1.03142	1.35821	1.27123	1.46658	0.876754	1.08677	1.11425	0.847114	0.991722	1.21449	0.717711	1.50968	0.965726	1.01338	1.02305	1.36984	1.17097	1.07985	0.759376	BRISC and BRCA1-A complex member 2	101121412	JEQ12_013757	GO:0006915,GO:0051301,GO:0006325,GO:0006302,GO:0007095,GO:0045739,GO:0010212,GO:0070531,GO:0070552,GO:0005737,GO:0031593	apoptotic process|cell division|chromatin organization|double-strand break repair|mitotic G2 DNA damage checkpoint signaling|positive regulation of DNA repair|response to ionizing radiation|BRCA1-A complex|BRISC complex|cytoplasm|polyubiquitin modification-dependent protein binding	oas03440	Homologous recombination	K12173					PF06113	BRE	Brain and reproductive organ-expressed protein (BRE)	IPR010358	Family
A0A6P3E739	JEQ12_019169	UPAR/Ly6 domain-containing protein	12.4868	A0A6P3E739;W5NU88	JEQ12_019169;LOC101119226	UPAR/Ly6 domain-containing protein;Ly-6/neurotoxin-like protein 1	1.56616e-17	46.9303	1.74986	1.92748	2.0857	1.80148	2.27863	2.66402	2.00466	1.90762	2.28277	1.52089	1.72939	2.23139	2.35493	2.44074	1.77631	1.9819	1.95488	1.78624	2.01609	2.47393	1.8299	1.84003	1.71484	1.89083	UPAR/Ly6 domain-containing protein	101119226	JEQ12_019169	GO:0005886	plasma membrane	oas04080	Neuroactive ligand-receptor interaction	K25369					PF00087	Toxin_TOLIP	Snake toxin and toxin-like protein	IPR016054,IPR045860,IPR035076	Domain|Homologous_superfamily|Domain
[truncated: 8,846 more rows]
[truncated: 1 more columns]
