# Supplementary material for: Proteome Analysis of Alpine Merino Sheep Skin Reveals New Insights into the Mechanisms Involved in Regulating Wool Fiber Diameter
Source: Int J Mol Sci. 2023 Oct 16;24(20):15227. doi: 10.3390/ijms242015227 (PMC10607505; doi:10.3390/ijms242015227)
Supplement: Supplementary file 1 [file ijms-24-15227-s001.zip › Supplementary Table S3.xlsx]

## Sheet: EFvsSF
id	Category	Term	ListHits	ListTotal	PopHits	PopTotal	p-value	padjust	Enrichment_score	proteins
GO:0005882	cellular_component	intermediate filament	9	229	222	38825	7.62741e-06	0.00309673	6.8733	A0A6P7D3P0:JEQ12_001211,A0A836AEG4:JEQ12_001210,A0A836AJB7:JEQ12_001214,A0A836AN55:JEQ12_009971,A0A836DA33:JEQ12_001208,B0LKP2:,W5Q0V6:KRT28,W5Q209:KRT39,W5Q702:LOC101108147
GO:0010506	biological_process	regulation of autophagy	3	229	20	38825	0.000214371	0.0246619	25.4312	A0A835ZV73:JEQ12_011975,A0A836CZG4:JEQ12_018632,W5NRP8:MTCL1
GO:0046168	biological_process	glycerol-3-phosphate catabolic process	2	229	5	38825	0.000342352	0.0246619	67.8166	A0A836AJY5:JEQ12_014394,W5Q983:GPD1
GO:0047952	molecular_function	glycerol-3-phosphate dehydrogenase [NAD(P)+] activity	2	229	5	38825	0.000342352	0.0246619	67.8166	A0A836AJY5:JEQ12_014394,W5Q983:GPD1
GO:2001070	molecular_function	starch binding	2	229	5	38825	0.000342352	0.0246619	67.8166	A0A836A896:JEQ12_018908,A0A835ZWC9:JEQ12_004337
GO:0008374	molecular_function	O-acyltransferase activity	4	229	57	38825	0.000364462	0.0246619	11.8976	A0A835ZZP8:JEQ12_006387,W5PRB8:LOC101110266,A0A6P3EMZ6:JEQ12_020059,A0A835ZL45:JEQ12_012647
GO:0005789	cellular_component	endoplasmic reticulum membrane	12	229	678	38825	0.000765292	0.04274	3.00073	A0A6P3YMV8:ELOVL4,A0A6P7E366:CERS4,A0A835ZTW1:JEQ12_005504,A0A835ZUS4:JEQ12_003670,A0A835ZZP8:JEQ12_006387,W5PB29:CYP2A6,W5PPH9:TMCO1,W5PRB8:LOC101110266,A0A6P3EDG1:JEQ12_002825,A0A6P3EGY6:JEQ12_003276,A0A6P3EMZ6:JEQ12_020059,A0A835ZL45:JEQ12_012647
GO:0009331	cellular_component	glycerol-3-phosphate dehydrogenase complex	2	229	8	38825	0.000947439	0.04274	42.3854	A0A836AJY5:JEQ12_014394,W5Q983:GPD1
GO:0034354	biological_process	'de novo' NAD biosynthetic process from tryptophan	2	229	8	38825	0.000947439	0.04274	42.3854	A0A836A809:AFMID,A0A836AIQ7:HAAO
GO:0045095	cellular_component	keratin filament	6	229	202	38825	0.00132281	0.053706	5.03589	A0A835ZW07:JEQ12_002790,A0A836AA19:JEQ12_002795,A0A836CXV0:JEQ12_002785,A0A836D8L1:JEQ12_001191,A0A836DAF4:JEQ12_001883,W5NPH3:
GO:0005811	cellular_component	lipid droplet	3	229	41	38825	0.00182982	0.0675372	12.4055	A0A836A271:JEQ12_005357,A0A6P3CWW8:JEQ12_007718,A0A835ZV84:JEQ12_011990
GO:0042073	biological_process	intraciliary transport	2	229	18	38825	0.00497974	0.113698	18.8379	A0A836CXZ2:JEQ12_005975,A0A6P3E1K1:JEQ12_009484
GO:0004866	molecular_function	endopeptidase inhibitor activity	2	229	19	38825	0.00554407	0.113698	17.8465	A0A835ZNI9:JEQ12_010477,A0A6P7DJX2:JEQ12_020001
GO:0003062	biological_process	regulation of heart rate by chemical signal	1	229	1	38825	0.00589826	0.113698	169.541	A0A3G0YYZ8:Srebp1
GO:0008812	molecular_function	choline dehydrogenase activity	1	229	1	38825	0.00589826	0.113698	169.541	A0A6P7D643:JEQ12_008378
GO:0019217	biological_process	regulation of fatty acid metabolic process	1	229	1	38825	0.00589826	0.113698	169.541	A0A3G0YYZ8:Srebp1
GO:0019285	biological_process	glycine betaine biosynthetic process from choline	1	229	1	38825	0.00589826	0.113698	169.541	A0A6P7D643:JEQ12_008378
GO:1903146	biological_process	regulation of autophagy of mitochondrion	1	229	1	38825	0.00589826	0.113698	169.541	A0A3G0YYZ8:Srebp1
GO:1903214	biological_process	regulation of protein targeting to mitochondrion	1	229	1	38825	0.00589826	0.113698	169.541	A0A3G0YYZ8:Srebp1
GO:0046854	biological_process	phosphatidylinositol phosphate biosynthetic process	2	229	20	38825	0.00613625	0.113698	16.9541	A0A835ZY35:JEQ12_007559,A0A836D5R9:JEQ12_009424
GO:0051287	molecular_function	NAD binding	3	229	75	38825	0.0100114	0.113698	6.78166	A0A836AJY5:JEQ12_014394,W5Q983:GPD1,A0A835ZMH1:JEQ12_010944
GO:0000334	molecular_function	3-hydroxyanthranilate 3,4-dioxygenase activity	1	229	2	38825	0.0117619	0.113698	84.7707	A0A836AIQ7:HAAO
GO:0000379	biological_process	tRNA-type intron splice site recognition and cleavage	1	229	2	38825	0.0117619	0.113698	84.7707	A0A836CW52:JEQ12_005743
GO:0001181	molecular_function	RNA polymerase I general transcription initiation factor activity	1	229	2	38825	0.0117619	0.113698	84.7707	A0A6P3EE45:JEQ12_012362
GO:0004061	molecular_function	arylformamidase activity	1	229	2	38825	0.0117619	0.113698	84.7707	A0A836A809:AFMID
GO:0004852	molecular_function	uroporphyrinogen-III synthase activity	1	229	2	38825	0.0117619	0.113698	84.7707	A0A835ZWG9:JEQ12_011751
GO:0006361	biological_process	transcription initiation at RNA polymerase I promoter	1	229	2	38825	0.0117619	0.113698	84.7707	A0A6P3EE45:JEQ12_012362
GO:0006780	biological_process	uroporphyrinogen III biosynthetic process	1	229	2	38825	0.0117619	0.113698	84.7707	A0A835ZWG9:JEQ12_011751
GO:0008172	molecular_function	S-methyltransferase activity	1	229	2	38825	0.0117619	0.113698	84.7707	A0A836A4Z2:JEQ12_017779
GO:0009086	biological_process	methionine biosynthetic process	1	229	2	38825	0.0117619	0.113698	84.7707	A0A836A4Z2:JEQ12_017779
GO:0009132	biological_process	nucleoside diphosphate metabolic process	1	229	2	38825	0.0117619	0.113698	84.7707	A0A836CWL4:JEQ12_004809
GO:0019203	molecular_function	carbohydrate phosphatase activity	1	229	2	38825	0.0117619	0.113698	84.7707	A0A836A896:JEQ12_018908
GO:0019799	molecular_function	tubulin N-acetyltransferase activity	1	229	2	38825	0.0117619	0.113698	84.7707	A0A6P7D7F7:ATAT1
GO:0032810	molecular_function	sterol response element binding	1	229	2	38825	0.0117619	0.113698	84.7707	A0A3G0YYZ8:Srebp1
GO:0034457	cellular_component	Mpp10 complex	1	229	2	38825	0.0117619	0.113698	84.7707	A0A835ZWT5:JEQ12_007798
GO:0035718	molecular_function	macrophage migration inhibitory factor binding	1	229	2	38825	0.0117619	0.113698	84.7707	A0A836AHX6:JEQ12_016969
GO:0042289	molecular_function	MHC class II protein binding	1	229	2	38825	0.0117619	0.113698	84.7707	A0A836AHX6:JEQ12_016969
GO:0045542	biological_process	positive regulation of cholesterol biosynthetic process	1	229	2	38825	0.0117619	0.113698	84.7707	A0A3G0YYZ8:Srebp1
GO:0047127	molecular_function	thiomorpholine-carboxylate dehydrogenase activity	1	229	2	38825	0.0117619	0.113698	84.7707	A0A6P7DF14:JEQ12_012406
GO:0070206	biological_process	protein trimerization	1	229	2	38825	0.0117619	0.113698	84.7707	A0A836AHX6:JEQ12_016969
GO:0071929	biological_process	alpha-tubulin acetylation	1	229	2	38825	0.0117619	0.113698	84.7707	A0A6P7D7F7:ATAT1
GO:0140932	molecular_function	5'-(N(7)-methyl 5'-triphosphoguanosine)-[mRNA] diphosphatase activity	1	229	2	38825	0.0117619	0.113698	84.7707	W5PTA9:DCPS
GO:0005975	biological_process	carbohydrate metabolic process	5	229	233	38825	0.0126804	0.117577	3.63823	A0A836A845:JEQ12_015790,A0A836A896:JEQ12_018908,A0A836AJY5:JEQ12_014394,A0A836D7F4:JEQ12_001387,W5Q983:GPD1
GO:0008237	molecular_function	metallopeptidase activity	3	229	82	38825	0.0127424	0.117577	6.20274	A0A836A1M9:JEQ12_017206,W5NZH3:,A0A6P3YHD7:JEQ12_008690
GO:0006629	biological_process	lipid metabolic process	4	229	155	38825	0.0136501	0.120186	4.37526	A0A6P3CWW8:JEQ12_007718,A0A6P3EDG1:JEQ12_002825,A0A835ZWC9:JEQ12_004337,W5QH94:LOC101104728
GO:0008081	molecular_function	phosphoric diester hydrolase activity	2	229	31	38825	0.0143929	0.120186	10.9382	A0A835ZTN7:JEQ12_011988,A0A835ZWC9:JEQ12_004337
GO:0050660	molecular_function	flavin adenine dinucleotide binding	3	229	90	38825	0.0163355	0.120186	5.65138	A0A6P7D643:JEQ12_008378,A0A835ZUS4:JEQ12_003670,W5Q902:TXNRD2
GO:0003983	molecular_function	UTP:glucose-1-phosphate uridylyltransferase activity	1	229	3	38825	0.0175911	0.120186	56.5138	A0A6P3TIW1:UGP2
GO:0006011	biological_process	UDP-glucose metabolic process	1	229	3	38825	0.0175911	0.120186	56.5138	A0A6P3TIW1:UGP2
GO:0008198	molecular_function	ferrous iron binding	1	229	3	38825	0.0175911	0.120186	56.5138	A0A836AIQ7:HAAO
GO:0010867	biological_process	positive regulation of triglyceride biosynthetic process	1	229	3	38825	0.0175911	0.120186	56.5138	A0A3G0YYZ8:Srebp1
GO:0010898	biological_process	positive regulation of triglyceride catabolic process	1	229	3	38825	0.0175911	0.120186	56.5138	A0A836CRZ6:JEQ12_011406
GO:0010945	molecular_function	CoA pyrophosphatase activity	1	229	3	38825	0.0175911	0.120186	56.5138	A0A836CWL4:JEQ12_004809
GO:0031647	biological_process	regulation of protein stability	1	229	3	38825	0.0175911	0.120186	56.5138	A0A3G0YYZ8:Srebp1
GO:0045046	biological_process	protein import into peroxisome membrane	1	229	3	38825	0.0175911	0.120186	56.5138	A0A6P7DZS1:JEQ12_015109
GO:2000271	biological_process	positive regulation of fibroblast apoptotic process	1	229	3	38825	0.0175911	0.120186	56.5138	W5PZD3:STK17B
GO:0000724	biological_process	double-strand break repair via homologous recombination	2	229	37	38825	0.020144	0.120186	9.1644	A0A836AAQ6:JEQ12_019234,A0A836D1R7:JEQ12_018401
GO:0030145	molecular_function	manganese ion binding	2	229	37	38825	0.020144	0.120186	9.1644	A0A836CWL4:JEQ12_004809,A0A8K1EPA0:LAP3
GO:0030670	cellular_component	phagocytic vesicle membrane	3	229	98	38825	0.0204398	0.120186	5.19005	A0A836CTN1:JEQ12_010562,I6WH56:,A0A2P9DU16:Class
GO:0003950	molecular_function	NAD+ ADP-ribosyltransferase activity	2	229	38	38825	0.0211816	0.120186	8.92324	A0A835ZXX7:SIRT4,A0A6P3TN32:JEQ12_015768
GO:0000213	molecular_function	tRNA-intron endonuclease activity	1	229	4	38825	0.023386	0.120186	42.3854	A0A836CW52:JEQ12_005743
GO:0001221	molecular_function	transcription coregulator binding	1	229	4	38825	0.023386	0.120186	42.3854	A0A3G0YYZ8:Srebp1
GO:0003951	molecular_function	NAD+ kinase activity	1	229	4	38825	0.023386	0.120186	42.3854	A0A6P3YPE9:JEQ12_003810
GO:0004587	molecular_function	ornithine-oxo-acid transaminase activity	1	229	4	38825	0.023386	0.120186	42.3854	A0A836CSQ6:JEQ12_011739
GO:0005732	cellular_component	sno(s)RNA-containing ribonucleoprotein complex	1	229	4	38825	0.023386	0.120186	42.3854	A0A835ZWT5:JEQ12_007798
GO:0006741	biological_process	NADP biosynthetic process	1	229	4	38825	0.023386	0.120186	42.3854	A0A6P3YPE9:JEQ12_003810
GO:0010951	biological_process	negative regulation of endopeptidase activity	1	229	4	38825	0.023386	0.120186	42.3854	A0A6P7DJX2:JEQ12_020001
GO:0016772	molecular_function	transferase activity, transferring phosphorus-containing groups	1	229	4	38825	0.023386	0.120186	42.3854	A0A6P7DXT0:JEQ12_014725
GO:0019674	biological_process	NAD metabolic process	1	229	4	38825	0.023386	0.120186	42.3854	A0A6P3YPE9:JEQ12_003810
GO:0032469	biological_process	endoplasmic reticulum calcium ion homeostasis	1	229	4	38825	0.023386	0.120186	42.3854	W5PPH9:TMCO1
GO:0035102	cellular_component	PRC1 complex	1	229	4	38825	0.023386	0.120186	42.3854	A0A836A820:JEQ12_002512
GO:0052595	molecular_function	aliphatic amine oxidase activity	1	229	4	38825	0.023386	0.120186	42.3854	W5NZA9:MAOB
GO:0052596	molecular_function	phenethylamine:oxygen oxidoreductase (deaminating) activity	1	229	4	38825	0.023386	0.120186	42.3854	W5NZA9:MAOB
GO:0072359	biological_process	circulatory system development	1	229	4	38825	0.023386	0.120186	42.3854	A0A836D5A1:JEQ12_009302
GO:0097016	molecular_function	L27 domain binding	1	229	4	38825	0.023386	0.120186	42.3854	A0A836A2J9:JEQ12_005537
GO:0097025	cellular_component	MPP7-DLG1-LIN7 complex	1	229	4	38825	0.023386	0.120186	42.3854	A0A836A2J9:JEQ12_005537
GO:0097621	molecular_function	monoamine oxidase activity	1	229	4	38825	0.023386	0.120186	42.3854	W5NZA9:MAOB
GO:1901029	biological_process	negative regulation of mitochondrial outer membrane permeabilization involved in apoptotic signaling pathway	1	229	4	38825	0.023386	0.120186	42.3854	A0A836D4N1:JEQ12_013724
GO:2000026	biological_process	regulation of multicellular organismal development	1	229	4	38825	0.023386	0.120186	42.3854	A0A836D5A1:JEQ12_009302
GO:0000214	cellular_component	tRNA-intron endonuclease complex	1	229	5	38825	0.0291469	0.136019	33.9083	A0A836CW52:JEQ12_005743
GO:0004088	molecular_function	carbamoyl-phosphate synthase (glutamine-hydrolyzing) activity	1	229	5	38825	0.0291469	0.136019	33.9083	A0A6P7DQB6:JEQ12_009809
GO:0005112	molecular_function	Notch binding	1	229	5	38825	0.0291469	0.136019	33.9083	A0A835ZX90:JEQ12_008113
GO:0006476	biological_process	protein deacetylation	1	229	5	38825	0.0291469	0.136019	33.9083	A0A835ZXX7:SIRT4
GO:0019789	molecular_function	SUMO transferase activity	1	229	5	38825	0.0291469	0.136019	33.9083	A0A836AAQ6:JEQ12_019234
GO:0034979	molecular_function	NAD-dependent protein deacetylase activity	1	229	5	38825	0.0291469	0.136019	33.9083	A0A835ZXX7:SIRT4
GO:0046676	biological_process	negative regulation of insulin secretion	1	229	5	38825	0.0291469	0.136019	33.9083	A0A3G0YYZ8:Srebp1
GO:0046923	molecular_function	ER retention sequence binding	1	229	5	38825	0.0291469	0.136019	33.9083	A0A835ZTW1:JEQ12_005504
GO:0005198	molecular_function	structural molecule activity	5	229	303	38825	0.0344089	0.149041	2.79771	B0LKP2:,W5NPH3:,W5Q0V6:KRT28,W5Q209:KRT39,W5Q702:LOC101108147
GO:0006569	biological_process	tryptophan catabolic process	1	229	6	38825	0.034874	0.149041	28.2569	A0A836AIQ7:HAAO
GO:0006621	biological_process	protein retention in ER lumen	1	229	6	38825	0.034874	0.149041	28.2569	A0A835ZTW1:JEQ12_005504
GO:0019805	biological_process	quinolinate biosynthetic process	1	229	6	38825	0.034874	0.149041	28.2569	A0A836AIQ7:HAAO
GO:0032933	biological_process	SREBP signaling pathway	1	229	6	38825	0.034874	0.149041	28.2569	A0A3G0YYZ8:Srebp1
GO:0036374	molecular_function	glutathione hydrolase activity	1	229	6	38825	0.034874	0.149041	28.2569	A0A6P7D3C7:JEQ12_007536
GO:0043420	biological_process	anthranilate metabolic process	1	229	6	38825	0.034874	0.149041	28.2569	A0A836AIQ7:HAAO
GO:2000303	biological_process	regulation of ceramide biosynthetic process	1	229	6	38825	0.034874	0.149041	28.2569	A0A6P3EDG1:JEQ12_002825
GO:0006672	biological_process	ceramide metabolic process	1	229	7	38825	0.0405675	0.157717	24.2202	A0A6P3ECM2:JEQ12_016424
GO:0017064	molecular_function	fatty acid amide hydrolase activity	1	229	7	38825	0.0405675	0.157717	24.2202	W5NWU7:LOC101103602
GO:0019433	biological_process	triglyceride catabolic process	1	229	7	38825	0.0405675	0.157717	24.2202	A0A836A271:JEQ12_005357
GO:0030663	cellular_component	COPI-coated vesicle membrane	1	229	7	38825	0.0405675	0.157717	24.2202	A0A835ZTW1:JEQ12_005504
GO:0043414	biological_process	macromolecule methylation	1	229	7	38825	0.0405675	0.157717	24.2202	A0A6P3E9P9:JEQ12_009536
GO:0045444	biological_process	fat cell differentiation	1	229	7	38825	0.0405675	0.157717	24.2202	A0A3G0YYZ8:Srebp1
GO:1902895	biological_process	positive regulation of miRNA transcription	1	229	7	38825	0.0405675	0.157717	24.2202	A0A3G0YYZ8:Srebp1
GO:0030198	biological_process	extracellular matrix organization	2	229	58	38825	0.0461417	0.157717	5.84626	W5NZH3:,A0A6P7DTX0:JEQ12_013398
GO:0000123	cellular_component	histone acetyltransferase complex	1	229	8	38825	0.0462275	0.157717	21.1927	A0A836CXP9:JEQ12_002635
GO:0000340	molecular_function	RNA 7-methylguanosine cap binding	1	229	8	38825	0.0462275	0.157717	21.1927	W5PTA9:DCPS
GO:0004332	molecular_function	fructose-bisphosphate aldolase activity	1	229	8	38825	0.0462275	0.157717	21.1927	P52210:ALDOB
GO:0005879	cellular_component	axonemal microtubule	1	229	8	38825	0.0462275	0.157717	21.1927	A0A6P3E1K1:JEQ12_009484
GO:0006478	biological_process	peptidyl-tyrosine sulfation	1	229	8	38825	0.0462275	0.157717	21.1927	A0A6P3T242:JEQ12_007427
GO:0008476	molecular_function	protein-tyrosine sulfotransferase activity	1	229	8	38825	0.0462275	0.157717	21.1927	A0A6P3T242:JEQ12_007427
GO:0009749	biological_process	response to glucose	1	229	8	38825	0.0462275	0.157717	21.1927	A0A3G0YYZ8:Srebp1
GO:0019915	biological_process	lipid storage	1	229	8	38825	0.0462275	0.157717	21.1927	A0A835ZV84:JEQ12_011990
GO:0030261	biological_process	chromosome condensation	1	229	8	38825	0.0462275	0.157717	21.1927	A0A836AKQ5:JEQ12_015276
GO:0030915	cellular_component	Smc5-Smc6 complex	1	229	8	38825	0.0462275	0.157717	21.1927	A0A836AAQ6:JEQ12_019234
GO:0032266	molecular_function	phosphatidylinositol-3-phosphate binding	1	229	8	38825	0.0462275	0.157717	21.1927	A0A836D1R7:JEQ12_018401
GO:0032502	biological_process	developmental process	1	229	8	38825	0.0462275	0.157717	21.1927	A0A835ZX90:JEQ12_008113
GO:0070072	biological_process	vacuolar proton-transporting V-type ATPase complex assembly	1	229	8	38825	0.0462275	0.157717	21.1927	A0A6P3EGY6:JEQ12_003276
GO:0102121	molecular_function	ceramidase activity	1	229	8	38825	0.0462275	0.157717	21.1927	A0A6P3ECM2:JEQ12_016424
GO:1901842	biological_process	negative regulation of high voltage-gated calcium channel activity	1	229	8	38825	0.0462275	0.157717	21.1927	A0A6P7ECZ1:JEQ12_019517
GO:1901981	molecular_function	phosphatidylinositol phosphate binding	1	229	8	38825	0.0462275	0.157717	21.1927	A0A6P7EKR8:JEQ12_004060
GO:0003676	molecular_function	nucleic acid binding	7	229	554	38825	0.0470761	0.159274	2.14222	A0A6P3EF08:JEQ12_010572,A0A836CW52:JEQ12_005743,W5PJD9:GPATCH11,A0A6P3E9P9:JEQ12_009536,W5P7I0:,W5PAD2:WBP4,W5QIC7:YBX3
GO:0030496	cellular_component	midbody	2	229	59	38825	0.0475795	0.159647	5.74717	W5Q8S1:SEPTIN2,A0A836D1R7:JEQ12_018401
GO:0003841	molecular_function	1-acylglycerol-3-phosphate O-acyltransferase activity	1	229	9	38825	0.0518542	0.159907	18.8379	A0A836AB62:JEQ12_013417
GO:0004791	molecular_function	thioredoxin-disulfide reductase activity	1	229	9	38825	0.0518542	0.159907	18.8379	W5Q902:TXNRD2
GO:0005854	cellular_component	nascent polypeptide-associated complex	1	229	9	38825	0.0518542	0.159907	18.8379	A0A836AGX7:JEQ12_015627
GO:0006379	biological_process	mRNA cleavage	1	229	9	38825	0.0518542	0.159907	18.8379	A0A6P3EF08:JEQ12_010572
GO:0015229	molecular_function	L-ascorbic acid transmembrane transporter activity	1	229	9	38825	0.0518542	0.159907	18.8379	A0A836AML3:JEQ12_009863
GO:0042789	biological_process	mRNA transcription by RNA polymerase II	1	229	9	38825	0.0518542	0.159907	18.8379	A0A3G0YYZ8:Srebp1
GO:0045109	biological_process	intermediate filament organization	1	229	9	38825	0.0518542	0.159907	18.8379	W5QIV5:RPTN
GO:0046512	biological_process	sphingosine biosynthetic process	1	229	9	38825	0.0518542	0.159907	18.8379	A0A6P3ECM2:JEQ12_016424
GO:0048666	biological_process	neuron development	1	229	9	38825	0.0518542	0.159907	18.8379	A0A6P7D7F7:ATAT1
GO:0070507	biological_process	regulation of microtubule cytoskeleton organization	1	229	9	38825	0.0518542	0.159907	18.8379	A0A6P7D7F7:ATAT1
GO:0016592	cellular_component	mediator complex	2	229	62	38825	0.0519895	0.159907	5.46908	A0A6P3E7T0:JEQ12_003166,A0A6P3ED31:MED11
GO:0019901	molecular_function	protein kinase binding	2	229	63	38825	0.0534908	0.163288	5.38227	A0A3G0YYZ8:Srebp1,A0A836AML3:JEQ12_009863
GO:0032580	cellular_component	Golgi cisterna membrane	2	229	64	38825	0.0550074	0.166599	5.29817	A0A836D5Y1:JEQ12_015089,A0A836D7F4:JEQ12_001387
GO:0000079	biological_process	regulation of cyclin-dependent protein serine/threonine kinase activity	1	229	10	38825	0.0574479	0.166599	16.9541	A0A836AML3:JEQ12_009863
GO:0005547	molecular_function	phosphatidylinositol-3,4,5-trisphosphate binding	1	229	10	38825	0.0574479	0.166599	16.9541	W5NSS0:ARAP3
GO:0008420	molecular_function	RNA polymerase II CTD heptapeptide repeat phosphatase activity	1	229	10	38825	0.0574479	0.166599	16.9541	A0A6P3EAP7:JEQ12_014544
GO:0017040	molecular_function	N-acylsphingosine amidohydrolase activity	1	229	10	38825	0.0574479	0.166599	16.9541	A0A6P3ECM2:JEQ12_016424
GO:0019441	biological_process	tryptophan catabolic process to kynurenine	1	229	10	38825	0.0574479	0.166599	16.9541	A0A836A809:AFMID
GO:0030212	biological_process	hyaluronan metabolic process	1	229	10	38825	0.0574479	0.166599	16.9541	W5NTW3:ITIH1
GO:0000139	cellular_component	Golgi membrane	5	229	358	38825	0.0618446	0.175216	2.3679	A0A6P3T242:JEQ12_007427,A0A835ZTW1:JEQ12_005504,A0A836D7F4:JEQ12_001387,W5PPH9:TMCO1,A0A6P3EB59:JEQ12_014881
GO:0006207	biological_process	'de novo' pyrimidine nucleobase biosynthetic process	1	229	11	38825	0.0630088	0.175216	15.4129	A0A6P7DQB6:JEQ12_009809
GO:0006751	biological_process	glutathione catabolic process	1	229	11	38825	0.0630088	0.175216	15.4129	A0A6P7D3C7:JEQ12_007536
GO:0016298	molecular_function	lipase activity	1	229	11	38825	0.0630088	0.175216	15.4129	A0A836A271:JEQ12_005357
GO:0034626	biological_process	fatty acid elongation, polyunsaturated fatty acid	1	229	11	38825	0.0630088	0.175216	15.4129	A0A6P3YMV8:ELOVL4
GO:0102756	molecular_function	very-long-chain 3-ketoacyl-CoA synthase activity	1	229	11	38825	0.0630088	0.175216	15.4129	A0A6P3YMV8:ELOVL4
GO:0000290	biological_process	deadenylation-dependent decapping of nuclear-transcribed mRNA	1	229	12	38825	0.068537	0.188014	14.1285	W5PTA9:DCPS
GO:0043014	molecular_function	alpha-tubulin binding	1	229	12	38825	0.068537	0.188014	14.1285	A0A835ZIZ3:JEQ12_012856
GO:0004879	molecular_function	nuclear receptor activity	2	229	73	38825	0.0693072	0.18885	4.64497	A0A3G0YYZ8:Srebp1,A0A0F7YC43:RORA
GO:0006888	biological_process	endoplasmic reticulum to Golgi vesicle-mediated transport	2	229	74	38825	0.0709643	0.189039	4.5822	A0A835ZTN7:JEQ12_011988,A0A6P3EB59:JEQ12_014881
GO:0007623	biological_process	circadian rhythm	1	229	13	38825	0.0740327	0.189039	13.0417	A0A3G0YYZ8:Srebp1
GO:0008757	molecular_function	S-adenosylmethionine-dependent methyltransferase activity	1	229	13	38825	0.0740327	0.189039	13.0417	A0A6P3E9P9:JEQ12_009536
GO:0009267	biological_process	cellular response to starvation	1	229	13	38825	0.0740327	0.189039	13.0417	A0A3G0YYZ8:Srebp1
GO:0031532	biological_process	actin cytoskeleton reorganization	1	229	13	38825	0.0740327	0.189039	13.0417	A0A836ALJ4:JEQ12_015222
GO:0035338	biological_process	long-chain fatty-acyl-CoA biosynthetic process	1	229	13	38825	0.0740327	0.189039	13.0417	A0A6P3YMV8:ELOVL4
GO:0051382	biological_process	kinetochore assembly	1	229	13	38825	0.0740327	0.189039	13.0417	A0A6P7EIU6:JEQ12_002560
GO:0055129	biological_process	L-proline biosynthetic process	1	229	13	38825	0.0740327	0.189039	13.0417	A0A836CSQ6:JEQ12_011739
GO:0090599	molecular_function	alpha-glucosidase activity	1	229	13	38825	0.0740327	0.189039	13.0417	A0A836A845:JEQ12_015790
GO:0098839	cellular_component	postsynaptic density membrane	1	229	13	38825	0.0740327	0.189039	13.0417	A0A836A2J9:JEQ12_005537
GO:0003712	molecular_function	transcription coregulator activity	2	229	78	38825	0.0777191	0.195609	4.34722	A0A6P3E7T0:JEQ12_003166,A0A6P3ED31:MED11
GO:0004859	molecular_function	phospholipase inhibitor activity	1	229	14	38825	0.0794961	0.195609	12.1101	W5PZL5:
GO:0007269	biological_process	neurotransmitter secretion	1	229	14	38825	0.0794961	0.195609	12.1101	A0A836A2J9:JEQ12_005537
GO:0015095	molecular_function	magnesium ion transmembrane transporter activity	1	229	14	38825	0.0794961	0.195609	12.1101	A0A6P3YJI1:JEQ12_019489
GO:0045454	biological_process	cell redox homeostasis	1	229	14	38825	0.0794961	0.195609	12.1101	W5Q902:TXNRD2
GO:0046332	molecular_function	SMAD binding	1	229	14	38825	0.0794961	0.195609	12.1101	A0A6P7EME8:JEQ12_003801
GO:0005819	cellular_component	spindle	2	229	80	38825	0.0811696	0.197996	4.23854	A0A6P7D7F7:ATAT1,W5Q8S1:SEPTIN2
GO:0022857	molecular_function	transmembrane transporter activity	4	229	276	38825	0.0814416	0.197996	2.45712	A0A836A046:JEQ12_017760,A0A836CW49:JEQ12_005681,A0A836D4N1:JEQ12_013724,A0A6P7D9I4:JEQ12_011366
GO:0004499	molecular_function	N,N-dimethylaniline monooxygenase activity	1	229	15	38825	0.0849274	0.199309	11.3028	A0A835ZUS4:JEQ12_003670
GO:0004806	molecular_function	triglyceride lipase activity	1	229	15	38825	0.0849274	0.199309	11.3028	A0A836CRZ6:JEQ12_011406
GO:0006383	biological_process	transcription by RNA polymerase III	1	229	15	38825	0.0849274	0.199309	11.3028	A0A836D6D9:JEQ12_008956
GO:0008376	molecular_function	acetylgalactosaminyltransferase activity	1	229	15	38825	0.0849274	0.199309	11.3028	A0A836D5Y1:JEQ12_015089
GO:0019367	biological_process	fatty acid elongation, saturated fatty acid	1	229	15	38825	0.0849274	0.199309	11.3028	A0A6P3YMV8:ELOVL4
GO:0050291	molecular_function	sphingosine N-acyltransferase activity	1	229	15	38825	0.0849274	0.199309	11.3028	A0A6P7E366:CERS4
GO:0004016	molecular_function	adenylate cyclase activity	1	229	16	38825	0.0903269	0.20719	10.5963	A0A836ADC2:JEQ12_017874
GO:0006171	biological_process	cAMP biosynthetic process	1	229	16	38825	0.0903269	0.20719	10.5963	A0A836ADC2:JEQ12_017874
GO:0008286	biological_process	insulin receptor signaling pathway	1	229	16	38825	0.0903269	0.20719	10.5963	A0A3G0YYZ8:Srebp1
GO:0042761	biological_process	very long-chain fatty acid biosynthetic process	1	229	16	38825	0.0903269	0.20719	10.5963	A0A6P3YMV8:ELOVL4
GO:0000281	biological_process	mitotic cytokinesis	1	229	17	38825	0.0956946	0.212306	9.97303	A0A836D1R7:JEQ12_018401
GO:0003810	molecular_function	protein-glutamine gamma-glutamyltransferase activity	1	229	17	38825	0.0956946	0.212306	9.97303	A0A835ZPE6:JEQ12_007962
GO:0005666	cellular_component	RNA polymerase III complex	1	229	17	38825	0.0956946	0.212306	9.97303	A0A836D6D9:JEQ12_008956
GO:0016925	biological_process	protein sumoylation	1	229	17	38825	0.0956946	0.212306	9.97303	A0A836AAQ6:JEQ12_019234
GO:0034440	biological_process	lipid oxidation	1	229	17	38825	0.0956946	0.212306	9.97303	A0A6P3YJY3:JEQ12_003123
GO:0051693	biological_process	actin filament capping	1	229	17	38825	0.0956946	0.212306	9.97303	A0A6P7DS61:JEQ12_009844
GO:0008009	molecular_function	chemokine activity	2	229	89	38825	0.0972509	0.214586	3.80992	A0A836D611:JEQ12_008880,A0A836D206:JEQ12_003341
GO:0006139	biological_process	nucleobase-containing compound metabolic process	1	229	18	38825	0.101031	0.21935	9.41897	W5P7I0:
GO:0048015	biological_process	phosphatidylinositol-mediated signaling	1	229	18	38825	0.101031	0.21935	9.41897	A0A835ZY35:JEQ12_007559
GO:0098590	cellular_component	plasma membrane region	1	229	18	38825	0.101031	0.21935	9.41897	A0A836AML3:JEQ12_009863
GO:0004298	molecular_function	threonine-type endopeptidase activity	1	229	19	38825	0.106336	0.22369	8.92324	A0A835ZXC6:JEQ12_002179
GO:0005978	biological_process	glycogen biosynthetic process	1	229	19	38825	0.106336	0.22369	8.92324	A0A6P3TIW1:UGP2
GO:0006782	biological_process	protoporphyrinogen IX biosynthetic process	1	229	19	38825	0.106336	0.22369	8.92324	A0A835ZWG9:JEQ12_011751
GO:0009922	molecular_function	fatty acid elongase activity	1	229	19	38825	0.106336	0.22369	8.92324	A0A6P3YMV8:ELOVL4
GO:0018149	biological_process	peptide cross-linking	1	229	19	38825	0.106336	0.22369	8.92324	A0A835ZPE6:JEQ12_007962
GO:0030334	biological_process	regulation of cell migration	1	229	19	38825	0.106336	0.22369	8.92324	A0A836D5A1:JEQ12_009302
GO:0016514	cellular_component	SWI/SNF complex	1	229	20	38825	0.111609	0.232376	8.47707	A0A6P3EE85:JEQ12_012530
GO:0046513	biological_process	ceramide biosynthetic process	1	229	20	38825	0.111609	0.232376	8.47707	A0A6P7E366:CERS4
GO:0032154	cellular_component	cleavage furrow	1	229	21	38825	0.116852	0.240822	8.0734	W5Q8S1:SEPTIN2
GO:0060170	cellular_component	ciliary membrane	1	229	21	38825	0.116852	0.240822	8.0734	W5Q8S1:SEPTIN2
GO:0008092	molecular_function	cytoskeletal protein binding	1	229	22	38825	0.122064	0.250292	7.70643	W5PZL5:
GO:0006364	biological_process	rRNA processing	2	229	104	38825	0.125782	0.255527	3.26041	A0A835ZWT5:JEQ12_007798,A0A6P3EBE2:JEQ12_007663
GO:0006695	biological_process	cholesterol biosynthetic process	1	229	23	38825	0.127245	0.255527	7.37137	A0A3G0YYZ8:Srebp1
GO:0006953	biological_process	acute-phase response	1	229	23	38825	0.127245	0.255527	7.37137	A0A836CRH8:JEQ12_010973
GO:0008654	biological_process	phospholipid biosynthetic process	1	229	23	38825	0.127245	0.255527	7.37137	A0A836AB62:JEQ12_013417
GO:0008270	molecular_function	zinc ion binding	11	229	1260	38825	0.127764	0.255527	1.48012	A0A835ZXX7:SIRT4,A0A0F7YC43:RORA,A0A6P3EF08:JEQ12_010572,A0A835ZXC6:JEQ12_002179,A0A836A1M9:JEQ12_017206,A0A836A4Z2:JEQ12_017779,A0A836AAQ6:JEQ12_019234,W5NSR4:,W5PAD2:WBP4,W5PJA4:ZMIZ1,W5PP29:ZNF638
GO:0051015	molecular_function	actin filament binding	2	229	106	38825	0.129725	0.258178	3.1989	A0A6P3T738:SHROOM4,A0A6P7DS61:JEQ12_009844
GO:0044238	biological_process	primary metabolic process	1	229	24	38825	0.132396	0.262208	7.06423	A0A6P3E9P9:JEQ12_009536
GO:0005839	cellular_component	proteasome core complex	1	229	25	38825	0.137516	0.269718	6.78166	A0A835ZXC6:JEQ12_002179
GO:0070006	molecular_function	metalloaminopeptidase activity	1	229	25	38825	0.137516	0.269718	6.78166	A0A8K1EPA0:LAP3
GO:0006636	biological_process	unsaturated fatty acid biosynthetic process	1	229	26	38825	0.142607	0.275706	6.52083	A0A6P3YMV8:ELOVL4
GO:0030073	biological_process	insulin secretion	1	229	26	38825	0.142607	0.275706	6.52083	A0A3G0YYZ8:Srebp1
GO:0032040	cellular_component	small-subunit processome	1	229	26	38825	0.142607	0.275706	6.52083	A0A6P3EBE2:JEQ12_007663
GO:0004177	molecular_function	aminopeptidase activity	1	229	27	38825	0.147667	0.276281	6.27931	A0A836A1M9:JEQ12_017206
GO:0005834	cellular_component	heterotrimeric G-protein complex	1	229	27	38825	0.147667	0.276281	6.27931	A0A6P7EWU8:JEQ12_005463
GO:0005885	cellular_component	Arp2/3 protein complex	1	229	27	38825	0.147667	0.276281	6.27931	A0A836A1U6:JEQ12_005704
GO:0005905	cellular_component	clathrin-coated pit	1	229	27	38825	0.147667	0.276281	6.27931	A0A6P7D7F7:ATAT1
GO:0016328	cellular_component	lateral plasma membrane	1	229	27	38825	0.147667	0.276281	6.27931	A0A836A2J9:JEQ12_005537
GO:0031681	molecular_function	G-protein beta-subunit binding	1	229	27	38825	0.147667	0.276281	6.27931	A0A6P7EWU8:JEQ12_005463
GO:0034364	cellular_component	high-density lipoprotein particle	1	229	27	38825	0.147667	0.276281	6.27931	A0A836CRH8:JEQ12_010973
GO:0042742	biological_process	defense response to bacterium	2	229	116	38825	0.14984	0.27906	2.92313	O19031:Bac11,W5QH94:LOC101104728
GO:0016712	molecular_function	oxidoreductase activity, acting on paired donors, with incorporation or reduction of molecular oxygen, reduced flavin or flavoprotein as one donor, and incorporation of one atom of oxygen	1	229	28	38825	0.152698	0.280522	6.05505	W5PB29:CYP2A6
GO:0030672	cellular_component	synaptic vesicle membrane	1	229	28	38825	0.152698	0.280522	6.05505	A0A836A046:JEQ12_017760
GO:0070403	molecular_function	NAD+ binding	1	229	28	38825	0.152698	0.280522	6.05505	A0A835ZXX7:SIRT4
GO:0006541	biological_process	glutamine metabolic process	1	229	29	38825	0.157699	0.28583	5.84626	A0A6P7DQB6:JEQ12_009809
GO:0006958	biological_process	complement activation, classical pathway	1	229	29	38825	0.157699	0.28583	5.84626	A0A835ZNI9:JEQ12_010477
GO:0033116	cellular_component	endoplasmic reticulum-Golgi intermediate compartment membrane	1	229	29	38825	0.157699	0.28583	5.84626	A0A835ZTN7:JEQ12_011988
GO:0000226	biological_process	microtubule cytoskeleton organization	1	229	30	38825	0.162671	0.289669	5.65138	W5PQK0:MAP6
GO:0006302	biological_process	double-strand break repair	1	229	30	38825	0.162671	0.289669	5.65138	A0A836AML3:JEQ12_009863
GO:0016702	molecular_function	oxidoreductase activity, acting on single donors with incorporation of molecular oxygen, incorporation of two atoms of oxygen	1	229	30	38825	0.162671	0.289669	5.65138	A0A6P3YJY3:JEQ12_003123
GO:0051603	biological_process	proteolysis involved in protein catabolic process	1	229	30	38825	0.162671	0.289669	5.65138	A0A835ZXC6:JEQ12_002179
GO:0000428	cellular_component	DNA-directed RNA polymerase complex	1	229	32	38825	0.172527	0.304548	5.29817	A0A6P3EF08:JEQ12_010572
GO:0034314	biological_process	Arp2/3 complex-mediated actin nucleation	1	229	32	38825	0.172527	0.304548	5.29817	A0A836A1U6:JEQ12_005704
GO:0001503	biological_process	ossification	1	229	33	38825	0.177412	0.307817	5.13762	A0A835ZSN8:JEQ12_007405
GO:0007010	biological_process	cytoskeleton organization	1	229	33	38825	0.177412	0.307817	5.13762	A0A6P7DS61:JEQ12_009844
GO:0042147	biological_process	retrograde transport, endosome to Golgi	1	229	33	38825	0.177412	0.307817	5.13762	A0A6P3EB59:JEQ12_014881
GO:0044877	molecular_function	protein-containing complex binding	1	229	33	38825	0.177412	0.307817	5.13762	A0A6P7DZS1:JEQ12_015109
GO:0003779	molecular_function	actin binding	4	229	374	38825	0.180587	0.311993	1.81328	A0A835ZYX0:JEQ12_018695,A0A836ALJ4:JEQ12_015222,A0A836A1U6:JEQ12_005704,W5Q756:JMY
GO:0003899	molecular_function	DNA-directed 5'-3' RNA polymerase activity	1	229	34	38825	0.182268	0.312239	4.98651	A0A6P3EF08:JEQ12_010572
GO:0046914	molecular_function	transition metal ion binding	1	229	34	38825	0.182268	0.312239	4.98651	W5QIV5:RPTN
GO:0042803	molecular_function	protein homodimerization activity	2	229	132	38825	0.183151	0.312435	2.56881	A0A836AJY5:JEQ12_014394,W5Q983:GPD1
GO:0006807	biological_process	nitrogen compound metabolic process	1	229	35	38825	0.187095	0.31519	4.84404	A0A6P3E9P9:JEQ12_009536
GO:0008203	biological_process	cholesterol metabolic process	1	229	35	38825	0.187095	0.31519	4.84404	A0A836A271:JEQ12_005357
GO:0016791	molecular_function	phosphatase activity	1	229	35	38825	0.187095	0.31519	4.84404	A0A836D626:JEQ12_010142
GO:0005516	molecular_function	calmodulin binding	2	229	136	38825	0.191644	0.3193	2.49326	A0A835ZYX0:JEQ12_018695,W5PQK0:MAP6
GO:0005747	cellular_component	mitochondrial respiratory chain complex I	1	229	36	38825	0.191894	0.3193	4.70949	A0A6P3E7B5:
GO:0006836	biological_process	neurotransmitter transport	1	229	36	38825	0.191894	0.3193	4.70949	A0A836A046:JEQ12_017760
GO:0005484	molecular_function	SNAP receptor activity	1	229	37	38825	0.196665	0.323263	4.5822	A0A6P7DEC9:JEQ12_012604
GO:0016829	molecular_function	lyase activity	1	229	37	38825	0.196665	0.323263	4.5822	A0A836CW52:JEQ12_005743
GO:0046873	molecular_function	metal ion transmembrane transporter activity	1	229	37	38825	0.196665	0.323263	4.5822	A0A836A7T4:JEQ12_002392
GO:0031090	cellular_component	organelle membrane	3	229	261	38825	0.200368	0.325243	1.94875	A0A836D1P4:JEQ12_018341,W5P7I0:,W5QIC7:YBX3
GO:0005833	cellular_component	hemoglobin complex	1	229	38	38825	0.201408	0.325243	4.46162	A0A7S9XD72:HBB
GO:0006506	biological_process	GPI anchor biosynthetic process	1	229	38	38825	0.201408	0.325243	4.46162	A0A835ZTN7:JEQ12_011988
GO:0008194	molecular_function	UDP-glycosyltransferase activity	1	229	38	38825	0.201408	0.325243	4.46162	W5PEP4:GYG2
GO:0002504	biological_process	antigen processing and presentation of peptide or polysaccharide antigen via MHC class II	3	229	262	38825	0.201875	0.325243	1.94131	A8IW66:DRB1,F8T894:DQB,I6VNY9:
GO:0004864	molecular_function	protein phosphatase inhibitor activity	1	229	40	38825	0.21081	0.336964	4.23854	A0A6P3E4D8:JEQ12_000813
GO:0016620	molecular_function	oxidoreductase activity, acting on the aldehyde or oxo group of donors, NAD or NADP as acceptor	1	229	40	38825	0.21081	0.336964	4.23854	A0A835ZMH1:JEQ12_010944
GO:0016746	molecular_function	acyltransferase activity	1	229	41	38825	0.21547	0.341624	4.13516	A0A6P7D3C7:JEQ12_007536
GO:0030215	molecular_function	semaphorin receptor binding	1	229	41	38825	0.21547	0.341624	4.13516	A0A836AFA6:JEQ12_016590
GO:0005737	cellular_component	cytoplasm	20	229	2797	38825	0.21625	0.341624	1.21231	A0A3G0YYZ8:Srebp1,A0A6P7D7F7:ATAT1,P52210:ALDOB,A0A836AIQ7:HAAO,W5PTA9:DCPS,A0A6P3E1W3:JEQ12_010021,A0A6P3YJY3:JEQ12_003123,A0A835ZIZ3:JEQ12_012856,A0A835ZXC6:JEQ12_002179,A0A835ZXR4:JEQ12_002072,A0A835ZYX0:JEQ12_018695,A0A836A896:JEQ12_018908,A0A836CXZ2:JEQ12_005975,W5PQK0:MAP6,A0A6P3E4D8:JEQ12_000813,A0A6P3T738:SHROOM4,A0A6P3TBK2:JEQ12_010000,A0A6P7EKR8:JEQ12_004060,A0A835ZL33:JEQ12_011338,A0A8…
GO:0005901	cellular_component	caveola	1	229	42	38825	0.220102	0.346362	4.0367	A0A836A271:JEQ12_005357
GO:0005778	cellular_component	peroxisomal membrane	1	229	44	38825	0.229285	0.355304	3.85322	A0A6P7DZS1:JEQ12_015109
GO:0005922	cellular_component	connexin complex	1	229	44	38825	0.229285	0.355304	3.85322	A0A6P3T630:JEQ12_012695
GO:0008373	molecular_function	sialyltransferase activity	1	229	44	38825	0.229285	0.355304	3.85322	A0A6P3TUJ5:JEQ12_001312
GO:0031424	biological_process	keratinization	1	229	44	38825	0.229285	0.355304	3.85322	A0A836AIR9:JEQ12_000869
GO:0000922	cellular_component	spindle pole	1	229	45	38825	0.233836	0.360979	3.76759	A0A6P3YKA6:JEQ12_002597
GO:0098793	cellular_component	presynapse	1	229	46	38825	0.23836	0.366569	3.68568	A0A836A2J9:JEQ12_005537
GO:0005344	molecular_function	oxygen carrier activity	1	229	47	38825	0.242858	0.36929	3.60727	A0A7S9XD72:HBB
GO:0007169	biological_process	transmembrane receptor protein tyrosine kinase signaling pathway	1	229	47	38825	0.242858	0.36929	3.60727	A0A836D5A1:JEQ12_009302
GO:0007268	biological_process	chemical synaptic transmission	1	229	47	38825	0.242858	0.36929	3.60727	A0A836A046:JEQ12_017760
GO:0031047	biological_process	RNA-mediated gene silencing	1	229	48	38825	0.247329	0.374685	3.53211	A0A836D6D9:JEQ12_008956
GO:0016323	cellular_component	basolateral plasma membrane	1	229	49	38825	0.251774	0.377197	3.46003	A0A836A2J9:JEQ12_005537
GO:0031514	cellular_component	motile cilium	1	229	49	38825	0.251774	0.377197	3.46003	W5Q8S1:SEPTIN2
GO:0043065	biological_process	positive regulation of apoptotic process	1	229	49	38825	0.251774	0.377197	3.46003	A0A6P7EKR8:JEQ12_004060
GO:0005604	cellular_component	basement membrane	1	229	50	38825	0.256193	0.38225	3.39083	W5PZL5:
GO:0005856	cellular_component	cytoskeleton	4	229	436	38825	0.25703	0.38225	1.55543	A0A835ZIZ3:JEQ12_012856,A0A836CXZ2:JEQ12_005975,A0A6P3T738:SHROOM4,W5PK85:EML2
GO:0004364	molecular_function	glutathione transferase activity	1	229	51	38825	0.260586	0.386123	3.32434	A0A6P3EEW7:JEQ12_010445
GO:0019825	molecular_function	oxygen binding	1	229	52	38825	0.264953	0.390164	3.26041	A0A7S9XD72:HBB
GO:0004843	molecular_function	cysteine-type deubiquitinase activity	2	229	170	38825	0.265235	0.390164	1.99461	A0A835ZMS8:JEQ12_008401,A0A835ZWY9:JEQ12_003043
GO:0005739	cellular_component	mitochondrion	4	229	454	38825	0.280382	0.410957	1.49376	A0A836AGH6:JEQ12_016356,A0A836D4N1:JEQ12_013724,A0A836A9M6:JEQ12_008750,W5Q030:POLG2
GO:0048511	biological_process	rhythmic process	1	229	56	38825	0.282165	0.412083	3.02753	A0A836D7Z2:JEQ12_014596
GO:0008138	molecular_function	protein tyrosine/serine/threonine phosphatase activity	1	229	57	38825	0.286406	0.416777	2.97441	A0A836A896:JEQ12_018908
GO:0006397	biological_process	mRNA processing	2	229	181	38825	0.289211	0.419356	1.87339	W5PTA9:DCPS,A0A6P3TJ94:PRPF18
GO:0005262	molecular_function	calcium channel activity	1	229	58	38825	0.290621	0.4199	2.92313	W5PPH9:TMCO1
GO:0007154	biological_process	cell communication	1	229	59	38825	0.294811	0.422944	2.87358	A0A6P3T630:JEQ12_012695
GO:0030424	cellular_component	axon	1	229	59	38825	0.294811	0.422944	2.87358	A0A6P7D7F7:ATAT1
GO:0008234	molecular_function	cysteine-type peptidase activity	1	229	60	38825	0.298977	0.42741	2.82569	A0A6P3TGE4:JEQ12_001520
GO:0010466	biological_process	negative regulation of peptidase activity	1	229	61	38825	0.303118	0.4303	2.77937	W5NTW3:ITIH1
GO:0050661	molecular_function	NADP binding	1	229	61	38825	0.303118	0.4303	2.77937	A0A835ZUS4:JEQ12_003670
GO:0007219	biological_process	Notch signaling pathway	1	229	62	38825	0.307235	0.434625	2.73454	A0A835ZX90:JEQ12_008113
GO:0006096	biological_process	glycolytic process	1	229	63	38825	0.311327	0.437033	2.69113	P52210:ALDOB
GO:0006417	biological_process	regulation of translation	1	229	63	38825	0.311327	0.437033	2.69113	A0A836D6D9:JEQ12_008956
GO:0005730	cellular_component	nucleolus	3	229	333	38825	0.313533	0.437033	1.5274	A0A6P3EF08:JEQ12_010572,A0A6P3E3L2:JEQ12_015159,A0A6P3EBE2:JEQ12_007663
GO:0006281	biological_process	DNA repair	2	229	193	38825	0.31526	0.437033	1.75691	A0A6P7EIU6:JEQ12_002560,A0A835ZYG6:JEQ12_007712
GO:0001228	molecular_function	DNA-binding transcription activator activity, RNA polymerase II-specific	1	229	64	38825	0.315396	0.437033	2.64909	A0A3G0YYZ8:Srebp1
GO:0031012	cellular_component	extracellular matrix	1	229	64	38825	0.315396	0.437033	2.64909	W5NSR4:
GO:0004896	molecular_function	cytokine receptor activity	1	229	66	38825	0.323462	0.446685	2.56881	A0A6P7EJN4:JEQ12_000926
GO:0004714	molecular_function	transmembrane receptor protein tyrosine kinase activity	1	229	67	38825	0.327459	0.44915	2.53047	A0A836D5A1:JEQ12_009302
GO:0005925	cellular_component	focal adhesion	1	229	67	38825	0.327459	0.44915	2.53047	A0A6P7D7F7:ATAT1
GO:0006887	biological_process	exocytosis	1	229	68	38825	0.331432	0.453069	2.49326	A0A836A2J9:JEQ12_005537
GO:0016567	biological_process	protein ubiquitination	3	229	346	38825	0.334438	0.455643	1.47001	A0A836AAQ6:JEQ12_019234,W5P9X6:CBLL1,A0A6P7EUL0:JEQ12_004894
GO:0005544	molecular_function	calcium-dependent phospholipid binding	1	229	70	38825	0.33931	0.458554	2.42202	W5PZL5:
GO:0031410	cellular_component	cytoplasmic vesicle	1	229	70	38825	0.33931	0.458554	2.42202	W5Q756:JMY
GO:0005615	cellular_component	extracellular space	6	229	806	38825	0.340365	0.458554	1.2621	A0A835ZNI9:JEQ12_010477,A0A835ZV73:JEQ12_011975,A0A836CZG4:JEQ12_018632,A0A836D611:JEQ12_008880,A0A836D206:JEQ12_003341,W5NRP8:MTCL1
GO:0008289	molecular_function	lipid binding	2	229	205	38825	0.341092	0.458554	1.65406	A0A6P3TBK2:JEQ12_010000,A0A836A5X2:JEQ12_003423
GO:0140658	molecular_function	ATP-dependent chromatin remodeler activity	1	229	71	38825	0.343214	0.459884	2.38791	A0A836D2R0:JEQ12_019316
GO:0016757	molecular_function	glycosyltransferase activity	1	229	72	38825	0.347095	0.462034	2.35474	A0A836D7F4:JEQ12_001387
GO:0043547	biological_process	positive regulation of GTPase activity	1	229	72	38825	0.347095	0.462034	2.35474	W5NSS0:ARAP3
GO:0016192	biological_process	vesicle-mediated transport	2	229	211	38825	0.353898	0.46955	1.60703	A0A6P3E9W7:JEQ12_013864,A0A6P7DEC9:JEQ12_012604
GO:0007049	biological_process	cell cycle	2	229	217	38825	0.366616	0.48484	1.56259	W5Q8S1:SEPTIN2,A0A6P3E4D8:JEQ12_000813
GO:0002250	biological_process	adaptive immune response	3	229	367	38825	0.368129	0.48526	1.3859	A8IW66:DRB1,F8T894:DQB,I6VNY9:
GO:0017018	molecular_function	myosin phosphatase activity	1	229	78	38825	0.369906	0.486025	2.17361	A0A6P3EAP7:JEQ12_014544
GO:0005509	molecular_function	calcium ion binding	8	229	1159	38825	0.376407	0.492594	1.17026	A0A835ZX90:JEQ12_008113,W5PZL5:,A0A6P3E3J6:JEQ12_014802,A0A6P3YPC8:JEQ12_012434,A0A6P7DXT0:JEQ12_014725,A0A835ZLH3:JEQ12_011908,A0A836AIB7:JEQ12_015218,W5QIV5:RPTN
GO:0003682	molecular_function	chromatin binding	1	229	80	38825	0.377332	0.492594	2.11927	A0A3G0YYZ8:Srebp1
GO:0031966	cellular_component	mitochondrial membrane	1	229	81	38825	0.381012	0.494632	2.0931	A0A836AJY5:JEQ12_014394
GO:0016310	biological_process	phosphorylation	2	229	224	38825	0.38133	0.494632	1.51376	A0A835ZY35:JEQ12_007559,A0A6P3YPE9:JEQ12_003810
GO:0004222	molecular_function	metalloendopeptidase activity	2	229	226	38825	0.385508	0.497982	1.50037	W5NSR4:,A0A6P7DWV4:JEQ12_014543
GO:0016787	molecular_function	hydrolase activity	3	229	379	38825	0.38726	0.497982	1.34202	A0A836CTY7:JEQ12_008213,A0A836D2R0:JEQ12_019316,A0A835ZVP3:JEQ12_004998
GO:0045087	biological_process	innate immune response	2	229	227	38825	0.387592	0.497982	1.49376	A0A835ZNI9:JEQ12_010477,A0A836AGH6:JEQ12_016356
GO:0006511	biological_process	ubiquitin-dependent protein catabolic process	2	229	228	38825	0.389673	0.499077	1.48721	A0A835ZMS8:JEQ12_008401,A0A835ZWY9:JEQ12_003043
GO:0008146	molecular_function	sulfotransferase activity	1	229	84	38825	0.391923	0.50038	2.01835	A0A836AIB7:JEQ12_015218
GO:0006486	biological_process	protein glycosylation	2	229	230	38825	0.393826	0.501234	1.47427	A0A836D7F4:JEQ12_001387,A0A6P3TUJ5:JEQ12_001312
GO:0051301	biological_process	cell division	2	229	232	38825	0.397967	0.50492	1.46156	W5Q8S1:SEPTIN2,A0A6P3E4D8:JEQ12_000813
GO:0005829	cellular_component	cytosol	5	229	704	38825	0.401249	0.507499	1.20413	A0A836A271:JEQ12_005357,A0A836A809:AFMID,A0A6P3EB59:JEQ12_014881,A0A836D8L1:JEQ12_001191,W5NPH3:
GO:0006351	biological_process	DNA-templated transcription	1	229	87	38825	0.402643	0.507681	1.94875	A0A6P3EF08:JEQ12_010572
GO:0008284	biological_process	positive regulation of cell population proliferation	1	229	90	38825	0.413175	0.519347	1.88379	A0A836D4N1:JEQ12_013724
GO:0008380	biological_process	RNA splicing	1	229	92	38825	0.420093	0.526413	1.84284	A0A6P3TJ94:PRPF18
GO:0043231	cellular_component	intracellular membrane-bounded organelle	1	229	93	38825	0.423521	0.529076	1.82303	A0A836A896:JEQ12_018908
GO:0000122	biological_process	negative regulation of transcription by RNA polymerase II	1	229	97	38825	0.437035	0.544283	1.74785	A0A3G0YYZ8:Srebp1
GO:0005681	cellular_component	spliceosomal complex	1	229	100	38825	0.446963	0.554945	1.69541	A0A6P3TJ94:PRPF18
GO:0005759	cellular_component	mitochondrial matrix	1	229	102	38825	0.453484	0.559619	1.66217	A0A835ZXX7:SIRT4
GO:0005929	cellular_component	cilium	1	229	102	38825	0.453484	0.559619	1.66217	A0A836CXZ2:JEQ12_005975
GO:0005815	cellular_component	microtubule organizing center	1	229	103	38825	0.456716	0.560202	1.64603	P52210:ALDOB
GO:0016301	molecular_function	kinase activity	1	229	103	38825	0.456716	0.560202	1.64603	A0A835ZY35:JEQ12_007559
GO:0005813	cellular_component	centrosome	1	229	105	38825	0.463123	0.56635	1.61468	A0A6P3YKA6:JEQ12_002597
GO:0016607	cellular_component	nuclear speck	1	229	106	38825	0.466299	0.566818	1.59945	A0A6P3TJ94:PRPF18
GO:0090304	biological_process	nucleic acid metabolic process	1	229	106	38825	0.466299	0.566818	1.59945	A0A6P3TDD4:HMG20A
GO:0003743	molecular_function	translation initiation factor activity	1	229	108	38825	0.472593	0.572612	1.56983	A0A836CTY7:JEQ12_008213
GO:0005874	cellular_component	microtubule	2	229	270	38825	0.473886	0.572612	1.25586	A0A6P7D7F7:ATAT1,W5PQK0:MAP6
GO:0110165	cellular_component	cellular anatomical entity	2	229	271	38825	0.475806	0.573227	1.25123	A0A6P7DJM9:JEQ12_020431,A0A6P7EME8:JEQ12_003801
GO:0030170	molecular_function	pyridoxal phosphate binding	1	229	110	38825	0.478814	0.575143	1.54129	A0A836CSQ6:JEQ12_011739
GO:0000398	biological_process	mRNA splicing, via spliceosome	1	229	114	38825	0.491036	0.588085	1.48721	W5PAD2:WBP4
GO:0006886	biological_process	intracellular protein transport	2	229	282	38825	0.496651	0.593059	1.20242	A0A836AHX6:JEQ12_016969,A0A6P7DEC9:JEQ12_012604
GO:0006260	biological_process	DNA replication	1	229	117	38825	0.500016	0.595327	1.44907	W5Q030:POLG2
GO:0032259	biological_process	methylation	1	229	118	38825	0.502974	0.597098	1.43679	A0A836A4Z2:JEQ12_017779
GO:0005923	cellular_component	bicellular tight junction	1	229	120	38825	0.508838	0.601492	1.41285	A0A836A2J9:JEQ12_005537
GO:0005506	molecular_function	iron ion binding	2	229	289	38825	0.509639	0.601492	1.1733	A0A6P3YJY3:JEQ12_003123,W5PB29:CYP2A6
GO:0006457	biological_process	protein folding	1	229	121	38825	0.511744	0.602226	1.40117	A0A835ZIZ3:JEQ12_012856
GO:0007399	biological_process	nervous system development	1	229	123	38825	0.517504	0.607245	1.37839	A0A836AFA6:JEQ12_016590
GO:0004842	molecular_function	ubiquitin-protein transferase activity	1	229	124	38825	0.520359	0.608835	1.36727	A0A836AAQ6:JEQ12_019234
GO:0005741	cellular_component	mitochondrial outer membrane	1	229	125	38825	0.523197	0.609847	1.35633	W5NZA9:MAOB
GO:0003723	molecular_function	RNA binding	7	229	1155	38825	0.524228	0.609847	1.02752	A0A6P3E1W3:JEQ12_010021,A0A836D6D9:JEQ12_008956,A0A835ZZ77:JEQ12_007245,A0A836CSS2:JEQ12_020577,W5PAZ7:ASCC1,W5PP29:ZNF638,W5QDS3:
GO:0016579	biological_process	protein deubiquitination	1	229	127	38825	0.528823	0.613435	1.33497	A0A835ZWY9:JEQ12_003043
GO:0004725	molecular_function	protein tyrosine phosphatase activity	1	229	129	38825	0.534384	0.618119	1.31428	A0A836A896:JEQ12_018908
GO:0140359	molecular_function	ABC-type transporter activity	1	229	134	38825	0.548	0.632068	1.26523	A0A836AA67:JEQ12_002243
GO:0046983	molecular_function	protein dimerization activity	2	229	314	38825	0.554205	0.637415	1.07988	A0A3G0YYZ8:Srebp1,A0A6P7EIU7:JEQ12_002732
GO:0006508	biological_process	proteolysis	6	229	1021	38825	0.560528	0.642866	0.996326	A0A836A1M9:JEQ12_017206,A0A836D8U8:JEQ12_001850,W5NSR4:,A0A6P3TGE4:JEQ12_001520,A0A6P7DWV4:JEQ12_014543,A0A8K1EPA0:LAP3
GO:0035556	biological_process	intracellular signal transduction	2	229	319	38825	0.56277	0.643619	1.06296	A0A836ADC2:JEQ12_017874,W5PZD3:STK17B
GO:0005525	molecular_function	GTP binding	5	229	850	38825	0.564361	0.643625	0.997303	W5Q8S1:SEPTIN2,A0A6P7ECZ1:JEQ12_019517,A0A836D4Q4:JEQ12_008687,A0A836D6N7:JEQ12_015877,A0A836D9Y5:JEQ12_000968
GO:0005044	molecular_function	scavenger receptor activity	1	229	149	38825	0.586514	0.667016	1.13786	A0A836D8U8:JEQ12_001850
GO:0016055	biological_process	Wnt signaling pathway	1	229	152	38825	0.593816	0.673434	1.1154	A0A6P7D0Q3:JEQ12_007441
GO:0016042	biological_process	lipid catabolic process	1	229	155	38825	0.600989	0.67967	1.09382	A0A836CRZ6:JEQ12_011406
GO:0016740	molecular_function	transferase activity	1	229	156	38825	0.603352	0.680447	1.0868	A0A836A9P7:JEQ12_002018
GO:0061630	molecular_function	ubiquitin protein ligase activity	1	229	157	38825	0.605701	0.681204	1.07988	W5P9X6:CBLL1
GO:0005840	cellular_component	ribosome	3	229	545	38825	0.625649	0.701295	0.933256	A0A836D1P4:JEQ12_018341,A0A6P3EK71:JEQ12_011223,A0A835ZL33:JEQ12_011338
GO:0020037	molecular_function	heme binding	2	229	359	38825	0.62702	0.701295	0.944521	W5PB29:CYP2A6,A0A7S9XD72:HBB
GO:0005085	molecular_function	guanyl-nucleotide exchange factor activity	2	229	363	38825	0.633027	0.704134	0.934113	A0A836ACQ8:JEQ12_000102,W5PV98:DENND6A
GO:0015031	biological_process	protein transport	2	229	363	38825	0.633027	0.704134	0.934113	A0A835ZTW1:JEQ12_005504,A0A836A2J9:JEQ12_005537
GO:0006954	biological_process	inflammatory response	1	229	172	38825	0.639318	0.709189	0.985706	A0A835ZNI9:JEQ12_010477
GO:0004674	molecular_function	protein serine/threonine kinase activity	2	229	373	38825	0.647716	0.714682	0.90907	W5PZD3:STK17B,A0A6P3EFS8:JEQ12_018710
GO:0007186	biological_process	G protein-coupled receptor signaling pathway	1	229	176	38825	0.64779	0.714682	0.963304	A0A6P7EWU8:JEQ12_005463
GO:0000981	molecular_function	DNA-binding transcription factor activity, RNA polymerase II-specific	2	229	379	38825	0.656304	0.722113	0.894678	A0A836A0Y3:JEQ12_007012,A0A836CSQ6:JEQ12_011739
GO:0007156	biological_process	homophilic cell adhesion via plasma membrane adhesion molecules	1	229	182	38825	0.660128	0.724357	0.931547	A0A835ZLH3:JEQ12_011908
GO:0004867	molecular_function	serine-type endopeptidase inhibitor activity	1	229	194	38825	0.683528	0.748012	0.873925	W5NTW3:ITIH1
GO:0006955	biological_process	immune response	6	229	1163	38825	0.685499	0.748153	0.874677	A0A836AHX6:JEQ12_016969,A0A836CTN1:JEQ12_010562,A0A836D611:JEQ12_008880,I6WH56:,A0A2P9DU16:Class,A0A836D206:JEQ12_003341
GO:0006915	biological_process	apoptotic process	1	229	213	38825	0.717341	0.780805	0.795969	A0A835ZV84:JEQ12_011990
GO:0030154	biological_process	cell differentiation	1	229	216	38825	0.72234	0.783837	0.784914	A0A836AFA6:JEQ12_016590
GO:0000287	molecular_function	magnesium ion binding	1	229	217	38825	0.723987	0.783837	0.781297	A0A836CWL4:JEQ12_004809
GO:0030246	molecular_function	carbohydrate binding	1	229	220	38825	0.728869	0.787024	0.770643	A0A836A845:JEQ12_015790
GO:0006470	biological_process	protein dephosphorylation	1	229	222	38825	0.732077	0.78839	0.7637	A0A836A896:JEQ12_018908
GO:0016887	molecular_function	ATP hydrolysis activity	2	229	448	38825	0.743402	0.797572	0.756882	A0A836AA67:JEQ12_002243,A0A6P7DEH4:JEQ12_012182
GO:0005096	molecular_function	GTPase activator activity	1	229	230	38825	0.744532	0.797572	0.737137	W5NSS0:ARAP3
GO:0019882	biological_process	antigen processing and presentation	4	229	868	38825	0.755409	0.807095	0.781297	A0A836AHX6:JEQ12_016969,A0A836CTN1:JEQ12_010562,I6WH56:,A0A2P9DU16:Class
GO:0016020	cellular_component	membrane	40	229	7449	38825	0.770056	0.820585	0.910412	A0A3G0YYZ8:Srebp1,A0A836AB62:JEQ12_013417,A0A6P3ECM2:JEQ12_016424,A0A6P7D3C7:JEQ12_007536,A0A835ZSN8:JEQ12_007405,A0A835ZX90:JEQ12_008113,A0A835ZYX0:JEQ12_018695,A0A836A1M9:JEQ12_017206,A0A836A845:JEQ12_015790,A0A836AA67:JEQ12_002243,A0A836AFA6:JEQ12_016590,A0A836AHX6:JEQ12_016969,A0A836CTY7:JEQ12_008213,A0A836D4N1:JEQ12_013724,A0A836D8U8:JEQ12_001850,W5PZL5:,A0A6P3E932:JEQ12_009017,A0A6P3E9W7:JE…
GO:0008017	molecular_function	microtubule binding	1	229	253	38825	0.77722	0.826051	0.670124	W5PQK0:MAP6
GO:0006357	biological_process	regulation of transcription by RNA polymerase II	1	229	286	38825	0.816979	0.866041	0.592802	A0A6P3ED31:MED11
GO:0005794	cellular_component	Golgi apparatus	2	229	534	38825	0.824977	0.872241	0.634987	A0A835ZTN7:JEQ12_011988,A0A6P3TUJ5:JEQ12_001312
GO:0007165	biological_process	signal transduction	2	229	537	38825	0.827351	0.87248	0.631439	A0A836D9Y5:JEQ12_000968,W5NSS0:ARAP3
GO:0007155	biological_process	cell adhesion	1	229	309	38825	0.84043	0.883975	0.548678	A0A836ALJ4:JEQ12_015222
GO:0003924	molecular_function	GTPase activity	2	229	573	38825	0.853671	0.895582	0.591768	A0A6P7ECZ1:JEQ12_019517,A0A836D9Y5:JEQ12_000968
GO:0004252	molecular_function	serine-type endopeptidase activity	1	229	345	38825	0.871271	0.908606	0.491425	A0A836D8U8:JEQ12_001850
GO:0043565	molecular_function	sequence-specific DNA binding	1	229	347	38825	0.872799	0.908606	0.488592	A0A0F7YC43:RORA
GO:0051260	biological_process	protein homooligomerization	1	229	347	38825	0.872799	0.908606	0.488592	A0A835ZTK5:JEQ12_011913
GO:0005179	molecular_function	hormone activity	1	229	351	38825	0.8758	0.909399	0.483024	A0A836CU25:JEQ12_006747
GO:0005634	cellular_component	nucleus	19	229	4106	38825	0.894378	0.92632	0.784532	A0A3G0YYZ8:Srebp1,A0A836A809:AFMID,W5PTA9:DCPS,A0A0F7YC43:RORA,A0A6P3E1W3:JEQ12_010021,A0A6P3TDD4:HMG20A,A0A6P7E366:CERS4,A0A835ZXC6:JEQ12_002179,A0A836A0Y3:JEQ12_007012,A0A836AAQ6:JEQ12_019234,A0A836AGH6:JEQ12_016356,A0A836AML3:JEQ12_009863,A0A836CSQ6:JEQ12_011739,W5PZD3:STK17B,A0A835ZZ77:JEQ12_007245,A0A836AKQ5:JEQ12_015276,A0A836D7Z2:JEQ12_014596,W5PAD2:WBP4,W5PP29:ZNF638
GO:0046872	molecular_function	metal ion binding	13	229	2961	38825	0.896807	0.926473	0.744356	A0A836ADC2:JEQ12_017874,A0A836A9P7:JEQ12_002018,A0A836D1R7:JEQ12_018401,A0A836D7F4:JEQ12_001387,W5NZH3:,W5P9X6:CBLL1,A0A6P3TN32:JEQ12_015768,A0A6P7DQB6:JEQ12_009809,A0A6P7DWV4:JEQ12_014543,A0A6P7EUL0:JEQ12_004894,A0A7S9XD72:HBB,A0A835ZWU4:JEQ12_002968,A0A836D5R9:JEQ12_009424
GO:0006468	biological_process	protein phosphorylation	4	229	1121	38825	0.899701	0.927104	0.604965	A0A836D5A1:JEQ12_009302,A0A835ZXR4:JEQ12_002072,W5PZD3:STK17B,A0A6P3EFS8:JEQ12_018710
GO:0004672	molecular_function	protein kinase activity	1	229	391	38825	0.902195	0.927319	0.43361	A0A835ZXR4:JEQ12_002072
GO:0006412	biological_process	translation	2	229	708	38825	0.922949	0.944394	0.478931	A0A836D1P4:JEQ12_018341,A0A6P3EK71:JEQ12_011223
GO:0005654	cellular_component	nucleoplasm	1	229	432	38825	0.923459	0.944394	0.392457	A0A6P3EF08:JEQ12_010572
GO:0003735	molecular_function	structural constituent of ribosome	2	229	737	38825	0.933118	0.951874	0.460085	A0A836D1P4:JEQ12_018341,A0A6P3EK71:JEQ12_011223
GO:0005576	cellular_component	extracellular region	6	229	1728	38825	0.944324	0.960698	0.588686	A0A836CU25:JEQ12_006747,A0A836D8U8:JEQ12_001850,W5NTW3:ITIH1,W5NZH3:,W5PZL5:,O19031:Bac11
GO:0042613	cellular_component	MHC class II protein complex	3	229	1040	38825	0.946501	0.960698	0.489062	A8IW66:DRB1,F8T894:DQB,I6VNY9:
GO:0006355	biological_process	regulation of DNA-templated transcription	2	229	815	38825	0.954546	0.966448	0.416053	A0A6P3E7T0:JEQ12_003166,W5P3A4:CASZ1
GO:0003677	molecular_function	DNA binding	6	229	1836	38825	0.962244	0.971819	0.554057	A0A6P3TDD4:HMG20A,A0A6P7E366:CERS4,A0A836A0Y3:JEQ12_007012,A0A836CSQ6:JEQ12_011739,A0A836D6D9:JEQ12_008956,A0A6P7EIU6:JEQ12_002560
GO:1990904	cellular_component	ribonucleoprotein complex	1	229	585	38825	0.96941	0.976626	0.289815	A0A836D1P4:JEQ12_018341
GO:0005524	molecular_function	ATP binding	10	229	2973	38825	0.983831	0.988702	0.570271	A0A836ADC2:JEQ12_017874,A0A836D5A1:JEQ12_009302,A0A835ZXR4:JEQ12_002072,A0A836AA67:JEQ12_002243,A0A836CTY7:JEQ12_008213,A0A836D2R0:JEQ12_019316,W5PZD3:STK17B,A0A6P3EFS8:JEQ12_018710,A0A6P7DEH4:JEQ12_012182,A0A6P7DQB6:JEQ12_009809
GO:0005886	cellular_component	plasma membrane	7	229	3417	38825	0.999863	0.999971	0.347319	A0A836ADC2:JEQ12_017874,A0A836D5A1:JEQ12_009302,A0A6P7D0Q3:JEQ12_007441,A0A836ALJ4:JEQ12_015222,A0A836CW49:JEQ12_005681,A0A836D626:JEQ12_010142,A0A835ZLH3:JEQ12_011908
GO:0004930	molecular_function	G protein-coupled receptor activity	1	229	1728	38825	0.999971	0.999971	0.0981143	W5P3D9:HCAR2

## Sheet: MFvsEF
id	Category	Term	ListHits	ListTotal	PopHits	PopTotal	p-value	padjust	Enrichment_score	proteins
GO:0045995	biological_process	regulation of embryonic development	2	190	14	38825	0.00208559	0.158688	29.1917	W5PCV9:LAMA3,W5PVY4:LAMA2
GO:0004571	molecular_function	mannosyl-oligosaccharide 1,2-alpha-mannosidase activity	2	190	16	38825	0.00273259	0.158688	25.5428	A0A6P3YMN6:JEQ12_018659,A0A6P7DSV8:JEQ12_013354
GO:0030334	biological_process	regulation of cell migration	2	190	19	38825	0.00385656	0.158688	21.5097	W5PCV9:LAMA3,W5PVY4:LAMA2
GO:0010506	biological_process	regulation of autophagy	2	190	20	38825	0.00427133	0.158688	20.4342	A0A836CZG4:JEQ12_018632,W5NRP8:MTCL1
GO:0030155	biological_process	regulation of cell adhesion	2	190	20	38825	0.00427133	0.158688	20.4342	W5PCV9:LAMA3,W5PVY4:LAMA2
GO:0052403	biological_process	negative regulation by host of symbiont catalytic activity	1	190	1	38825	0.00489375	0.158688	204.342	C5IJ93:RAB9A
GO:0002682	biological_process	regulation of immune system process	1	190	2	38825	0.00976368	0.158688	102.171	A0A836D8K5:JEQ12_008703
GO:0004484	molecular_function	mRNA guanylyltransferase activity	1	190	2	38825	0.00976368	0.158688	102.171	A0A6P7EDF3:JEQ12_018798
GO:0004651	molecular_function	polynucleotide 5'-phosphatase activity	1	190	2	38825	0.00976368	0.158688	102.171	A0A6P7EDF3:JEQ12_018798
GO:0030228	molecular_function	lipoprotein particle receptor activity	1	190	2	38825	0.00976368	0.158688	102.171	A0A835ZT53:JEQ12_012474
GO:0034457	cellular_component	Mpp10 complex	1	190	2	38825	0.00976368	0.158688	102.171	A0A835ZWT5:JEQ12_007798
GO:0043175	molecular_function	RNA polymerase core enzyme binding	1	190	2	38825	0.00976368	0.158688	102.171	A0A6P3DZ22:JEQ12_000549
GO:0140818	molecular_function	mRNA 5'-phosphatase activity	1	190	2	38825	0.00976368	0.158688	102.171	A0A6P7EDF3:JEQ12_018798
GO:0030670	cellular_component	phagocytic vesicle membrane	3	190	98	38825	0.0124874	0.158688	6.25537	A0A836CTN1:JEQ12_010562,C5IJ93:RAB9A,A0A2P9DU16:Class
GO:0004308	molecular_function	exo-alpha-sialidase activity	1	190	3	38825	0.0146099	0.158688	68.114	A0A835ZW35:JEQ12_010486
GO:0005833	cellular_component	hemoglobin complex	2	190	38	38825	0.0149193	0.158688	10.7548	A0A835ZT30:JEQ12_006225,W5PN58:
GO:0004867	molecular_function	serine-type endopeptidase inhibitor activity	4	190	194	38825	0.015484	0.158688	4.21324	A0A836AKA5:JEQ12_014976,W5NTW3:ITIH1,A0A835ZX46:JEQ12_008023,W5P9U5:LOC101104114
GO:0045095	cellular_component	keratin filament	4	190	202	38825	0.0176879	0.158688	4.04638	A0A835ZW00:JEQ12_002775,A0A836CXV0:JEQ12_002785,W5NPH3:,W5Q2U8:
GO:0008289	molecular_function	lipid binding	4	190	205	38825	0.0185621	0.158688	3.98716	A0A836A0A1:JEQ12_002103,A0A836A5X2:JEQ12_003423,A0A836AH91:JEQ12_001466,A0A836D082:JEQ12_004559
GO:0003980	molecular_function	UDP-glucose:glycoprotein glucosyltransferase activity	1	190	4	38825	0.0194325	0.158688	51.0855	A0A836A6H3:JEQ12_002272
GO:0005732	cellular_component	sno(s)RNA-containing ribonucleoprotein complex	1	190	4	38825	0.0194325	0.158688	51.0855	A0A835ZWT5:JEQ12_007798
GO:0006480	biological_process	N-terminal protein amino acid methylation	1	190	4	38825	0.0194325	0.158688	51.0855	A0A6P7DTJ3:JEQ12_013484
GO:0016972	molecular_function	thiol oxidase activity	1	190	4	38825	0.0194325	0.158688	51.0855	W5P0B1:ERO1B
GO:0030091	biological_process	protein repair	1	190	4	38825	0.0194325	0.158688	51.0855	A0A836A510:JEQ12_004162
GO:0035666	biological_process	TRIF-dependent toll-like receptor signaling pathway	1	190	4	38825	0.0194325	0.158688	51.0855	A0A836A8K7:JEQ12_017735
GO:0045921	biological_process	positive regulation of exocytosis	1	190	4	38825	0.0194325	0.158688	51.0855	C5IJ93:RAB9A
GO:0070734	biological_process	histone H3-K27 methylation	1	190	4	38825	0.0194325	0.158688	51.0855	A0A6P7E0V3:JEQ12_015859
GO:0072487	cellular_component	MSL complex	1	190	4	38825	0.0194325	0.158688	51.0855	A0A6P3E780:JEQ12_001792
GO:0097016	molecular_function	L27 domain binding	1	190	4	38825	0.0194325	0.158688	51.0855	A0A836A2J9:JEQ12_005537
GO:0097025	cellular_component	MPP7-DLG1-LIN7 complex	1	190	4	38825	0.0194325	0.158688	51.0855	A0A836A2J9:JEQ12_005537
GO:0102193	molecular_function	protein-ribulosamine 3-kinase activity	1	190	4	38825	0.0194325	0.158688	51.0855	A0A6P3E895:JEQ12_002585
GO:0140951	molecular_function	histone H3K27 trimethyltransferase activity	1	190	4	38825	0.0194325	0.158688	51.0855	A0A6P7E0V3:JEQ12_015859
GO:0042742	biological_process	defense response to bacterium	3	190	116	38825	0.0195278	0.158688	5.28471	O19031:Bac11,P79360:Map-34,W5QH94:LOC101104728
GO:0008373	molecular_function	sialyltransferase activity	2	190	44	38825	0.0196963	0.158688	9.28828	A0A836AIM8:JEQ12_013524,A0A6P3TUJ5:JEQ12_001312
GO:0005923	cellular_component	bicellular tight junction	3	190	120	38825	0.0213346	0.158688	5.10855	A0A6P3E7M5:JEQ12_001603,A0A835ZRC9:JEQ12_007588,A0A836A2J9:JEQ12_005537
GO:0005344	molecular_function	oxygen carrier activity	2	190	47	38825	0.0222935	0.158688	8.69541	A0A835ZT30:JEQ12_006225,W5PN58:
GO:0005576	cellular_component	extracellular region	15	190	1728	38825	0.0232332	0.158688	1.7738	A0A836A0Q8:JEQ12_006907,A0A836AHM3:JEQ12_001533,A0A836CTH6:JEQ12_010473,A0A836CU25:JEQ12_006747,A0A836CYW8:JEQ12_002341,A0A836D2Z7:JEQ12_019571,A0A836D8U8:JEQ12_001850,W5NTW3:ITIH1,W5PCV9:LAMA3,W5PVY4:LAMA2,A0A6P3ED94:JEQ12_017077,A0A836AH91:JEQ12_001466,A0A836D465:JEQ12_013438,O19031:Bac11,P79360:Map-34
GO:0007568	biological_process	aging	1	190	5	38825	0.0242317	0.158688	40.8684	A0A836AH91:JEQ12_001466
GO:0070059	biological_process	intrinsic apoptotic signaling pathway in response to endoplasmic reticulum stress	1	190	5	38825	0.0242317	0.158688	40.8684	W5QEF0:TMEM117
GO:1990961	biological_process	xenobiotic detoxification by transmembrane export across the plasma membrane	1	190	5	38825	0.0242317	0.158688	40.8684	A0A836CY36:JEQ12_002997
GO:2001070	molecular_function	starch binding	1	190	5	38825	0.0242317	0.158688	40.8684	A0A835ZWC9:JEQ12_004337
GO:0005604	cellular_component	basement membrane	2	190	50	38825	0.0250237	0.158688	8.17368	W5PCV9:LAMA3,W5PVY4:LAMA2
GO:0019825	molecular_function	oxygen binding	2	190	52	38825	0.0269156	0.158688	7.85931	A0A835ZT30:JEQ12_006225,W5PN58:
GO:0005509	molecular_function	calcium ion binding	11	190	1159	38825	0.0280606	0.158688	1.9394	A0A6P3E6W2:JEQ12_001515,A0A6P3YMN6:JEQ12_018659,A0A6P7DSV8:JEQ12_013354,A0A836A0Q8:JEQ12_006907,A0A836CYW8:JEQ12_002341,Q95LG2:,A0A6P3YPC8:JEQ12_012434,A0A6P7E4M1:JEQ12_016429,A0A836ACV6:JEQ12_000177,Q307E7:,W5Q9T5:
GO:0005094	molecular_function	Rho GDP-dissociation inhibitor activity	1	190	6	38825	0.0290075	0.158688	34.057	W5Q9B2:ARHGDIA
GO:0009790	biological_process	embryo development	1	190	6	38825	0.0290075	0.158688	34.057	A0A836AHM3:JEQ12_001533
GO:0033743	molecular_function	peptide-methionine (R)-S-oxide reductase activity	1	190	6	38825	0.0290075	0.158688	34.057	A0A836A510:JEQ12_004162
GO:0034975	biological_process	protein folding in endoplasmic reticulum	1	190	6	38825	0.0290075	0.158688	34.057	W5P0B1:ERO1B
GO:0036374	molecular_function	glutathione hydrolase activity	1	190	6	38825	0.0290075	0.158688	34.057	A0A6P7D3C7:JEQ12_007536
GO:0042910	molecular_function	xenobiotic transmembrane transporter activity	1	190	6	38825	0.0290075	0.158688	34.057	A0A836CY36:JEQ12_002997
GO:2000303	biological_process	regulation of ceramide biosynthetic process	1	190	6	38825	0.0290075	0.158688	34.057	A0A6P3EDG1:JEQ12_002825
GO:0006370	biological_process	7-methylguanosine mRNA capping	1	190	7	38825	0.03376	0.16779	29.1917	A0A6P7EDF3:JEQ12_018798
GO:0006895	biological_process	Golgi to endosome transport	1	190	7	38825	0.03376	0.16779	29.1917	A0A836ABD9:JEQ12_018624
GO:0019841	molecular_function	retinol binding	1	190	7	38825	0.03376	0.16779	29.1917	A0A836D465:JEQ12_013438
GO:0070461	cellular_component	SAGA-type complex	1	190	7	38825	0.03376	0.16779	29.1917	A0A6P3E4P6:JEQ12_001136
GO:0010466	biological_process	negative regulation of peptidase activity	2	190	61	38825	0.0361029	0.16779	6.69974	A0A836AKA5:JEQ12_014976,W5NTW3:ITIH1
GO:0004332	molecular_function	fructose-bisphosphate aldolase activity	1	190	8	38825	0.0384894	0.16779	25.5428	P52210:ALDOB
GO:0005672	cellular_component	transcription factor TFIIA complex	1	190	8	38825	0.0384894	0.16779	25.5428	A0A6P3EGG0:JEQ12_018524
GO:0006478	biological_process	peptidyl-tyrosine sulfation	1	190	8	38825	0.0384894	0.16779	25.5428	A0A6P3T242:JEQ12_007427
GO:0007389	biological_process	pattern specification process	1	190	8	38825	0.0384894	0.16779	25.5428	A0A836AHM3:JEQ12_001533
GO:0008276	molecular_function	protein methyltransferase activity	1	190	8	38825	0.0384894	0.16779	25.5428	A0A6P7DTJ3:JEQ12_013484
GO:0008476	molecular_function	protein-tyrosine sulfotransferase activity	1	190	8	38825	0.0384894	0.16779	25.5428	A0A6P3T242:JEQ12_007427
GO:0032266	molecular_function	phosphatidylinositol-3-phosphate binding	1	190	8	38825	0.0384894	0.16779	25.5428	A0A836D1R7:JEQ12_018401
GO:0071339	cellular_component	MLL1 complex	1	190	8	38825	0.0384894	0.16779	25.5428	W5QEF2:CHD8
GO:0006629	biological_process	lipid metabolic process	3	190	155	38825	0.0409022	0.174661	3.95501	A0A6P3EDG1:JEQ12_002825,A0A835ZWC9:JEQ12_004337,W5QH94:LOC101104728
GO:0004565	molecular_function	beta-galactosidase activity	1	190	9	38825	0.0431958	0.174661	22.7047	A0A6P3E216:JEQ12_009869
GO:0006379	biological_process	mRNA cleavage	1	190	9	38825	0.0431958	0.174661	22.7047	A0A6P3EF08:JEQ12_010572
GO:0030992	cellular_component	intraciliary transport particle B	1	190	9	38825	0.0431958	0.174661	22.7047	A0A6P3E402:JEQ12_000360
GO:0048513	biological_process	animal organ development	1	190	9	38825	0.0431958	0.174661	22.7047	A0A836AHM3:JEQ12_001533
GO:0005615	cellular_component	extracellular space	8	190	806	38825	0.0456477	0.175767	2.02821	A0A836AKA5:JEQ12_014976,A0A836CZG4:JEQ12_018632,A0A836D8K5:JEQ12_008703,A0A835ZX46:JEQ12_008023,A0A836D206:JEQ12_003341,A0A836D2B5:JEQ12_017502,W5NRP8:MTCL1,W5P9U5:LOC101104114
GO:0005547	molecular_function	phosphatidylinositol-3,4,5-trisphosphate binding	1	190	10	38825	0.0478792	0.175767	20.4342	W5NSS0:ARAP3
GO:0008028	molecular_function	monocarboxylic acid transmembrane transporter activity	1	190	10	38825	0.0478792	0.175767	20.4342	A0A6P3E392:SLC16A7
GO:0008420	molecular_function	RNA polymerase II CTD heptapeptide repeat phosphatase activity	1	190	10	38825	0.0478792	0.175767	20.4342	A0A6P3DZ22:JEQ12_000549
GO:0008519	molecular_function	ammonium transmembrane transporter activity	1	190	10	38825	0.0478792	0.175767	20.4342	W5PRU0:RHAG
GO:0030212	biological_process	hyaluronan metabolic process	1	190	10	38825	0.0478792	0.175767	20.4342	W5NTW3:ITIH1
GO:0042325	biological_process	regulation of phosphorylation	1	190	10	38825	0.0478792	0.175767	20.4342	A0A835ZKU9:JEQ12_011188
GO:0043547	biological_process	positive regulation of GTPase activity	2	190	72	38825	0.0487074	0.176485	5.67617	A0A836A4S5:JEQ12_015384,W5NSS0:ARAP3
GO:0004743	molecular_function	pyruvate kinase activity	1	190	11	38825	0.0525399	0.180971	18.5766	W5P276:PKLR
GO:0006081	biological_process	cellular aldehyde metabolic process	1	190	11	38825	0.0525399	0.180971	18.5766	A0A836CY36:JEQ12_002997
GO:0006751	biological_process	glutathione catabolic process	1	190	11	38825	0.0525399	0.180971	18.5766	A0A6P7D3C7:JEQ12_007536
GO:0030705	biological_process	cytoskeleton-dependent intracellular transport	1	190	11	38825	0.0525399	0.180971	18.5766	A0A836CTF0:JEQ12_007985
GO:0003747	molecular_function	translation release factor activity	1	190	12	38825	0.0571778	0.187678	17.0285	A0A836CZL5:JEQ12_018945
GO:0043014	molecular_function	alpha-tubulin binding	1	190	12	38825	0.0571778	0.187678	17.0285	A0A835ZIZ3:JEQ12_012856
GO:0051179	biological_process	localization	1	190	12	38825	0.0571778	0.187678	17.0285	W5NXI6:ANK1
GO:0051879	molecular_function	Hsp90 protein binding	1	190	12	38825	0.0571778	0.187678	17.0285	A0A836ALE8:JEQ12_000375
GO:0004683	molecular_function	calmodulin-dependent protein kinase activity	1	190	13	38825	0.0617932	0.192935	15.7186	W5PET9:CAMK2G
GO:0016798	molecular_function	hydrolase activity, acting on glycosyl bonds	1	190	13	38825	0.0617932	0.192935	15.7186	A0A836D6T4:JEQ12_000264
GO:0098839	cellular_component	postsynaptic density membrane	1	190	13	38825	0.0617932	0.192935	15.7186	A0A836A2J9:JEQ12_005537
GO:0005198	molecular_function	structural molecule activity	4	190	303	38825	0.0623102	0.192935	2.69759	A0A6P3E7M5:JEQ12_001603,A0A835ZRC9:JEQ12_007588,W5NPH3:,W5QIW0:
GO:0005856	cellular_component	cytoskeleton	5	190	436	38825	0.0639732	0.192935	2.34337	A0A835ZIZ3:JEQ12_012856,W5NXI6:ANK1,W5QA03:ABI2,A0A6P3T738:SHROOM4,W5PK85:EML2
GO:0007155	biological_process	cell adhesion	4	190	309	38825	0.0659592	0.192935	2.64521	Q95LG2:,W5PCV9:LAMA3,W5PVY4:LAMA2,A0A6P3ED94:JEQ12_017077
GO:0006401	biological_process	RNA catabolic process	1	190	14	38825	0.0663861	0.192935	14.5959	A0A6P3TRY4:JEQ12_016258
GO:0007269	biological_process	neurotransmitter secretion	1	190	14	38825	0.0663861	0.192935	14.5959	A0A836A2J9:JEQ12_005537
GO:0015035	molecular_function	protein-disulfide reductase activity	1	190	14	38825	0.0663861	0.192935	14.5959	W5P0B1:ERO1B
GO:0030955	molecular_function	potassium ion binding	1	190	14	38825	0.0663861	0.192935	14.5959	W5P276:PKLR
GO:0043226	cellular_component	organelle	1	190	14	38825	0.0663861	0.192935	14.5959	W5PET9:CAMK2G
GO:0006383	biological_process	transcription by RNA polymerase III	1	190	15	38825	0.0709566	0.199969	13.6228	A0A6P3TMF1:POLR3F
GO:0008376	molecular_function	acetylgalactosaminyltransferase activity	1	190	15	38825	0.0709566	0.199969	13.6228	A0A836D5Y1:JEQ12_015089
GO:1902475	biological_process	L-alpha-amino acid transmembrane transport	1	190	15	38825	0.0709566	0.199969	13.6228	A0A836A0D7:JEQ12_006460
GO:0032880	biological_process	regulation of protein localization	1	190	16	38825	0.0755049	0.210659	12.7714	C5IJ93:RAB9A
GO:0000281	biological_process	mitotic cytokinesis	1	190	17	38825	0.080031	0.214698	12.0201	A0A836D1R7:JEQ12_018401
GO:0005666	cellular_component	RNA polymerase III complex	1	190	17	38825	0.080031	0.214698	12.0201	A0A6P3TMF1:POLR3F
GO:0007160	biological_process	cell-matrix adhesion	1	190	17	38825	0.080031	0.214698	12.0201	W5Q9T5:
GO:0034440	biological_process	lipid oxidation	1	190	17	38825	0.080031	0.214698	12.0201	A0A6P3YJY3:JEQ12_003123
GO:0042073	biological_process	intraciliary transport	1	190	18	38825	0.0845351	0.222503	11.3523	A0A6P3E402:JEQ12_000360
GO:0048731	biological_process	system development	1	190	18	38825	0.0845351	0.222503	11.3523	A0A836AHM3:JEQ12_001533
GO:0004298	molecular_function	threonine-type endopeptidase activity	1	190	19	38825	0.0890172	0.229961	10.7548	A0A835ZXC6:JEQ12_002179
GO:0019003	molecular_function	GDP binding	1	190	19	38825	0.0890172	0.229961	10.7548	C5IJ93:RAB9A
GO:0016301	molecular_function	kinase activity	2	190	103	38825	0.090862	0.232573	3.96781	A0A6P3E895:JEQ12_002585,W5P276:PKLR
GO:0006364	biological_process	rRNA processing	2	190	104	38825	0.0923566	0.23425	3.92966	A0A835ZWT5:JEQ12_007798,A0A6P3EBE2:JEQ12_007663
GO:0016514	cellular_component	SWI/SNF complex	1	190	20	38825	0.0934775	0.234957	10.2171	A0A6P3EE85:JEQ12_012530
GO:0006869	biological_process	lipid transport	2	190	107	38825	0.0968831	0.241343	3.81948	A0A835ZT53:JEQ12_012474,A0A836AH91:JEQ12_001466
GO:0008013	molecular_function	beta-catenin binding	1	190	21	38825	0.0979161	0.241757	9.73058	W5QEF2:CHD8
GO:0046486	biological_process	glycerolipid metabolic process	1	190	22	38825	0.102333	0.242341	9.28828	A0A6P3E6W2:JEQ12_001515
GO:0006486	biological_process	protein glycosylation	3	190	230	38825	0.103805	0.242341	2.66533	A0A836A6H3:JEQ12_002272,A0A836AIM8:JEQ12_013524,A0A6P3TUJ5:JEQ12_001312
GO:0002039	molecular_function	p53 binding	1	190	23	38825	0.106729	0.242341	8.88444	W5QEF2:CHD8
GO:0004143	molecular_function	diacylglycerol kinase activity	1	190	23	38825	0.106729	0.242341	8.88444	A0A6P3E6W2:JEQ12_001515
GO:0004602	molecular_function	glutathione peroxidase activity	1	190	23	38825	0.106729	0.242341	8.88444	A0A836AIL0:JEQ12_015828
GO:0006953	biological_process	acute-phase response	1	190	23	38825	0.106729	0.242341	8.88444	A0A836D8K5:JEQ12_008703
GO:0007205	biological_process	protein kinase C-activating G protein-coupled receptor signaling pathway	1	190	23	38825	0.106729	0.242341	8.88444	A0A6P3E6W2:JEQ12_001515
GO:0008484	molecular_function	sulfuric ester hydrolase activity	1	190	23	38825	0.106729	0.242341	8.88444	A0A836AAB4:JEQ12_017196
GO:0098656	biological_process	monoatomic anion transmembrane transport	1	190	23	38825	0.106729	0.242341	8.88444	A0A836A0D7:JEQ12_006460
GO:0005975	biological_process	carbohydrate metabolic process	3	190	233	38825	0.106838	0.242341	2.63101	A0A6P3YMN6:JEQ12_018659,A0A6P7DSV8:JEQ12_013354,A0A6P3E216:JEQ12_009869
GO:0005839	cellular_component	proteasome core complex	1	190	25	38825	0.115455	0.255118	8.17368	A0A835ZXC6:JEQ12_002179
GO:0006284	biological_process	base-excision repair	1	190	25	38825	0.115455	0.255118	8.17368	A0A836D6T4:JEQ12_000264
GO:0032482	biological_process	Rab protein signal transduction	1	190	25	38825	0.115455	0.255118	8.17368	C5IJ93:RAB9A
GO:0016787	molecular_function	hydrolase activity	4	190	379	38825	0.116251	0.255118	2.15664	A0A836A6B1:JEQ12_003509,A0A836CTY7:JEQ12_008213,A0A835ZVP3:JEQ12_004998,A0A836A1E8:JEQ12_004997
GO:0006457	biological_process	protein folding	2	190	121	38825	0.118781	0.255118	3.37756	A0A6P7DH09:JEQ12_013007,A0A835ZIZ3:JEQ12_012856
GO:0000124	cellular_component	SAGA complex	1	190	26	38825	0.119787	0.255118	7.85931	A0A6P3TJP9:SGF29
GO:0006749	biological_process	glutathione metabolic process	1	190	26	38825	0.119787	0.255118	7.85931	A0A836AIL0:JEQ12_015828
GO:0032040	cellular_component	small-subunit processome	1	190	26	38825	0.119787	0.255118	7.85931	A0A6P3EBE2:JEQ12_007663
GO:0008324	molecular_function	monoatomic cation transmembrane transporter activity	1	190	27	38825	0.124097	0.259623	7.56823	A0A836CY36:JEQ12_002997
GO:0016328	cellular_component	lateral plasma membrane	1	190	27	38825	0.124097	0.259623	7.56823	A0A836A2J9:JEQ12_005537
GO:0007165	biological_process	signal transduction	5	190	537	38825	0.124693	0.259623	1.90263	A0A835ZW76:JEQ12_002910,A0A836A0A1:JEQ12_002103,A0A836A9Q9:JEQ12_008810,W5NXI6:ANK1,W5NSS0:ARAP3
GO:0007266	biological_process	Rho protein signal transduction	1	190	28	38825	0.128387	0.263382	7.29793	W5Q9B2:ARHGDIA
GO:0015297	molecular_function	antiporter activity	1	190	28	38825	0.128387	0.263382	7.29793	A0A836CY36:JEQ12_002997
GO:0003678	molecular_function	DNA helicase activity	1	190	29	38825	0.132655	0.26405	7.04628	W5QEF2:CHD8
GO:0030175	cellular_component	filopodium	1	190	29	38825	0.132655	0.26405	7.04628	W5QA03:ABI2
GO:0030178	biological_process	negative regulation of Wnt signaling pathway	1	190	29	38825	0.132655	0.26405	7.04628	W5QEF2:CHD8
GO:0016020	cellular_component	membrane	43	190	7449	38825	0.132852	0.26405	1.17958	A0A836A6B1:JEQ12_003509,A0A6P7D3C7:JEQ12_007536,A0A836CY36:JEQ12_002997,A0A6P3YMN6:JEQ12_018659,A0A6P7DSV8:JEQ12_013354,A0A835ZW76:JEQ12_002910,A0A836A0D7:JEQ12_006460,A0A836A2J5:JEQ12_004386,A0A836A9Q9:JEQ12_008810,A0A836AA67:JEQ12_002243,A0A836AD74:JEQ12_014542,A0A836AIL0:JEQ12_015828,A0A836AIM8:JEQ12_013524,A0A836AML4:JEQ12_009581,A0A836CTY7:JEQ12_008213,A0A836D2Z7:JEQ12_019571,A0A836D8U8:JEQ1…
GO:0005102	molecular_function	signaling receptor binding	2	190	130	38825	0.133444	0.26405	3.14372	W5PCV9:LAMA3,W5PVY4:LAMA2
GO:0016702	molecular_function	oxidoreductase activity, acting on single donors with incorporation of molecular oxygen, incorporation of two atoms of oxygen	1	190	30	38825	0.136903	0.265218	6.8114	A0A6P3YJY3:JEQ12_003123
GO:0051603	biological_process	proteolysis involved in protein catabolic process	1	190	30	38825	0.136903	0.265218	6.8114	A0A835ZXC6:JEQ12_002179
GO:0052689	molecular_function	carboxylic ester hydrolase activity	1	190	30	38825	0.136903	0.265218	6.8114	W5PQ36:AADACL3
GO:0002504	biological_process	antigen processing and presentation of peptide or polysaccharide antigen via MHC class II	3	190	262	38825	0.137837	0.265218	2.3398	A0A1Y5U0U0:DQB1,A0A377TEY1:MHC,F8T894:DQB
GO:0140359	molecular_function	ABC-type transporter activity	2	190	134	38825	0.140088	0.267702	3.04988	A0A836AA67:JEQ12_002243,A0A836A0K4:JEQ12_002268
GO:0008081	molecular_function	phosphoric diester hydrolase activity	1	190	31	38825	0.14113	0.267859	6.59168	A0A835ZWC9:JEQ12_004337
GO:0000428	cellular_component	DNA-directed RNA polymerase complex	1	190	32	38825	0.145336	0.27214	6.38569	A0A6P3EF08:JEQ12_010572
GO:0006367	biological_process	transcription initiation at RNA polymerase II promoter	1	190	32	38825	0.145336	0.27214	6.38569	A0A6P3EGG0:JEQ12_018524
GO:0110165	cellular_component	cellular anatomical entity	3	190	271	38825	0.14802	0.274452	2.26209	A0A836AAB4:JEQ12_017196,W5Q9T5:,W5QBU1:NTNG1
GO:0005540	molecular_function	hyaluronic acid binding	1	190	33	38825	0.149522	0.274452	6.19219	A0A6P3ED94:JEQ12_017077
GO:0005635	cellular_component	nuclear envelope	1	190	33	38825	0.149522	0.274452	6.19219	W5Q2Y2:SYNE3
GO:0005764	cellular_component	lysosome	2	190	141	38825	0.151879	0.276957	2.89847	C5IJ93:RAB9A,A0A6P3E216:JEQ12_009869
GO:0003899	molecular_function	DNA-directed 5'-3' RNA polymerase activity	1	190	34	38825	0.153688	0.278435	6.01006	A0A6P3EF08:JEQ12_010572
GO:0006807	biological_process	nitrogen compound metabolic process	1	190	35	38825	0.157833	0.282279	5.83835	A0A836A6B1:JEQ12_003509
GO:0016791	molecular_function	phosphatase activity	1	190	35	38825	0.157833	0.282279	5.83835	A0A836D626:JEQ12_010142
GO:0000724	biological_process	double-strand break repair via homologous recombination	1	190	37	38825	0.166063	0.293238	5.52276	A0A836D1R7:JEQ12_018401
GO:0046873	molecular_function	metal ion transmembrane transporter activity	1	190	37	38825	0.166063	0.293238	5.52276	A0A836A7T4:JEQ12_002392
GO:0032012	biological_process	regulation of ARF protein signal transduction	1	190	39	38825	0.174213	0.305695	5.23954	A0A6P7EDK3:JEQ12_018882
GO:0004864	molecular_function	protein phosphatase inhibitor activity	1	190	40	38825	0.178259	0.307001	5.10855	A0A835ZKU9:JEQ12_011188
GO:0016620	molecular_function	oxidoreductase activity, acting on the aldehyde or oxo group of donors, NAD or NADP as acceptor	1	190	40	38825	0.178259	0.307001	5.10855	A0A836CY36:JEQ12_002997
GO:0042393	molecular_function	histone binding	1	190	40	38825	0.178259	0.307001	5.10855	W5QEF2:CHD8
GO:0016746	molecular_function	acyltransferase activity	1	190	41	38825	0.182284	0.310105	4.98395	A0A6P7D3C7:JEQ12_007536
GO:0030215	molecular_function	semaphorin receptor binding	1	190	41	38825	0.182284	0.310105	4.98395	A0A836A9Q9:JEQ12_008810
GO:0005770	cellular_component	late endosome	1	190	43	38825	0.190277	0.319802	4.75214	C5IJ93:RAB9A
GO:0006338	biological_process	chromatin remodeling	1	190	43	38825	0.190277	0.319802	4.75214	A0A6P7E0V3:JEQ12_015859
GO:0005922	cellular_component	connexin complex	1	190	44	38825	0.194244	0.324515	4.64414	A0A6P3T630:JEQ12_012695
GO:0098609	biological_process	cell-cell adhesion	1	190	46	38825	0.20212	0.333677	4.44222	W5QDE8:PKP2
GO:0098793	cellular_component	presynapse	1	190	46	38825	0.20212	0.333677	4.44222	A0A836A2J9:JEQ12_005537
GO:0005788	cellular_component	endoplasmic reticulum lumen	1	190	48	38825	0.209919	0.342499	4.25713	A0A836A6H3:JEQ12_002272
GO:0007596	biological_process	blood coagulation	1	190	48	38825	0.209919	0.342499	4.25713	A0A836CYW8:JEQ12_002341
GO:0016323	cellular_component	basolateral plasma membrane	1	190	49	38825	0.21379	0.346788	4.17025	A0A836A2J9:JEQ12_005537
GO:0004364	molecular_function	glutathione transferase activity	1	190	51	38825	0.221476	0.355126	4.00671	A0A836AIL0:JEQ12_015828
GO:0004523	molecular_function	RNA-DNA hybrid ribonuclease activity	1	190	51	38825	0.221476	0.355126	4.00671	A0A6P3TRY4:JEQ12_016258
GO:0012505	cellular_component	endomembrane system	1	190	53	38825	0.229087	0.363156	3.85551	W5PVQ8:CDC42EP4
GO:0071949	molecular_function	FAD binding	1	190	53	38825	0.229087	0.363156	3.85551	W5P0B1:ERO1B
GO:0004252	molecular_function	serine-type endopeptidase activity	3	190	345	38825	0.239125	0.376753	1.77689	A0A836CYW8:JEQ12_002341,A0A836D8U8:JEQ12_001850,A0A835ZWK7:JEQ12_007886
GO:0048511	biological_process	rhythmic process	1	190	56	38825	0.240366	0.376753	3.64897	A0A6P7E0V3:JEQ12_015859
GO:0008138	molecular_function	protein tyrosine/serine/threonine phosphatase activity	1	190	57	38825	0.244089	0.380451	3.58495	A0A6P7EDF3:JEQ12_018798
GO:0030198	biological_process	extracellular matrix organization	1	190	58	38825	0.247793	0.383404	3.52314	A0A6P7DTX0:JEQ12_013398
GO:0007154	biological_process	cell communication	1	190	59	38825	0.25148	0.383404	3.46343	A0A6P3T630:JEQ12_012695
GO:0030496	cellular_component	midbody	1	190	59	38825	0.25148	0.383404	3.46343	A0A836D1R7:JEQ12_018401
GO:0051539	molecular_function	4 iron, 4 sulfur cluster binding	1	190	59	38825	0.25148	0.383404	3.46343	A0A836D6T4:JEQ12_000264
GO:0020037	molecular_function	heme binding	3	190	359	38825	0.257386	0.390275	1.70759	A0A835ZT30:JEQ12_006225,A0A835ZL52:JEQ12_011521,W5PN58:
GO:0006979	biological_process	response to oxidative stress	1	190	61	38825	0.258799	0.390297	3.34987	A0A836A510:JEQ12_004162
GO:0006096	biological_process	glycolytic process	1	190	63	38825	0.266048	0.399071	3.24353	P52210:ALDOB
GO:0002250	biological_process	adaptive immune response	3	190	367	38825	0.267906	0.399711	1.67037	A0A1Y5U0U0:DQB1,A0A377TEY1:MHC,F8T894:DQB
GO:0032580	cellular_component	Golgi cisterna membrane	1	190	64	38825	0.269645	0.400165	3.19285	A0A836D5Y1:JEQ12_015089
GO:0005581	cellular_component	collagen trimer	1	190	65	38825	0.273225	0.403332	3.14372	A0A836D2Z7:JEQ12_019571
GO:0030027	cellular_component	lamellipodium	1	190	67	38825	0.280333	0.411647	3.04988	W5QA03:ABI2
GO:0006887	biological_process	exocytosis	1	190	68	38825	0.283861	0.414645	3.00503	A0A836A2J9:JEQ12_005537
GO:0000413	biological_process	protein peptidyl-prolyl isomerization	1	190	69	38825	0.287372	0.415949	2.96148	A0A6P7DH09:JEQ12_013007
GO:0003676	molecular_function	nucleic acid binding	4	190	554	38825	0.287735	0.415949	1.47539	A0A6P3EF08:JEQ12_010572,W5PJD9:GPATCH11,A0A836A9D3:JEQ12_014051,W5Q287:
GO:0030246	molecular_function	carbohydrate binding	2	190	220	38825	0.292546	0.420724	1.85766	A0A836AML4:JEQ12_009581,Q95LG2:
GO:0140658	molecular_function	ATP-dependent chromatin remodeler activity	1	190	71	38825	0.294342	0.421136	2.87806	W5QEF2:CHD8
GO:0005882	cellular_component	intermediate filament	2	190	222	38825	0.296155	0.421568	1.84092	A0A6P7D3P0:JEQ12_001211,A0A836AEG4:JEQ12_001210
GO:0016310	biological_process	phosphorylation	2	190	224	38825	0.299762	0.424481	1.82448	A0A6P3E895:JEQ12_002585,W5P276:PKLR
GO:0004879	molecular_function	nuclear receptor activity	1	190	73	38825	0.301244	0.424481	2.79921	A0A0F7YC43:RORA
GO:0005096	molecular_function	GTPase activator activity	2	190	230	38825	0.310562	0.435411	1.77689	A0A836A0A1:JEQ12_002103,W5NSS0:ARAP3
GO:0055085	biological_process	transmembrane transport	1	190	77	38825	0.314848	0.439214	2.65379	A0A836A6B1:JEQ12_003509
GO:0008237	molecular_function	metallopeptidase activity	1	190	82	38825	0.331483	0.460119	2.49198	A0A6P3YHD7:JEQ12_008690
GO:0006914	biological_process	autophagy	1	190	85	38825	0.341271	0.471359	2.40402	A0A836CY36:JEQ12_002997
GO:0015293	molecular_function	symporter activity	1	190	86	38825	0.344502	0.473234	2.37607	A0A836A0D7:JEQ12_006460
GO:0004386	molecular_function	helicase activity	1	190	87	38825	0.347717	0.473234	2.34876	W5Q2X5:HELZ
GO:0006351	biological_process	DNA-templated transcription	1	190	87	38825	0.347717	0.473234	2.34876	A0A6P3EF08:JEQ12_010572
GO:0008009	molecular_function	chemokine activity	1	190	89	38825	0.3541	0.479582	2.29598	A0A836D206:JEQ12_003341
GO:0045892	biological_process	negative regulation of DNA-templated transcription	1	190	93	38825	0.36668	0.494221	2.19723	W5QEF2:CHD8
GO:0043066	biological_process	negative regulation of apoptotic process	1	190	96	38825	0.375955	0.504285	2.12856	W5QEF2:CHD8
GO:0006897	biological_process	endocytosis	1	190	97	38825	0.379016	0.505959	2.10662	A0A836AML4:JEQ12_009581
GO:0005929	cellular_component	cilium	1	190	102	38825	0.394101	0.523591	2.00335	A0A6P3E402:JEQ12_000360
GO:0005815	cellular_component	microtubule organizing center	1	190	103	38825	0.397074	0.525041	1.9839	P52210:ALDOB
GO:0008168	molecular_function	methyltransferase activity	1	190	104	38825	0.400032	0.526458	1.96483	A0A6P3ELN5:JEQ12_012443
GO:0051015	molecular_function	actin filament binding	1	190	106	38825	0.405906	0.53168	1.92776	A0A6P3T738:SHROOM4
GO:0003743	molecular_function	translation initiation factor activity	1	190	108	38825	0.411722	0.536778	1.89206	A0A836CTY7:JEQ12_008213
GO:0005506	molecular_function	iron ion binding	2	190	289	38825	0.413968	0.537196	1.41413	A0A6P3YJY3:JEQ12_003123,A0A835ZL52:JEQ12_011521
GO:0003755	molecular_function	peptidyl-prolyl cis-trans isomerase activity	1	190	111	38825	0.420341	0.541084	1.84092	A0A6P7DH09:JEQ12_013007
GO:0008270	molecular_function	zinc ion binding	7	190	1260	38825	0.420843	0.541084	1.13523	A0A0F7YC43:RORA,A0A6P3EF08:JEQ12_010572,A0A835ZXC6:JEQ12_002179,A0A836AKA5:JEQ12_014976,A0A6P3E1E5:JEQ12_009584,A0A836A0K4:JEQ12_002268,W5PJA4:ZMIZ1
GO:0006260	biological_process	DNA replication	1	190	117	38825	0.437203	0.559539	1.74651	W5Q030:POLG2
GO:0032259	biological_process	methylation	1	190	118	38825	0.439965	0.560504	1.73171	A0A6P3ELN5:JEQ12_012443
GO:0007399	biological_process	nervous system development	1	190	123	38825	0.453577	0.572615	1.66132	A0A836A9Q9:JEQ12_008810
GO:0035091	molecular_function	phosphatidylinositol binding	1	190	123	38825	0.453577	0.572615	1.66132	A0A836A4S5:JEQ12_015384
GO:0016579	biological_process	protein deubiquitination	1	190	127	38825	0.464229	0.583423	1.60899	A0A836AFP3:JEQ12_017408
GO:0004497	molecular_function	monooxygenase activity	1	190	128	38825	0.466859	0.584098	1.59642	A0A835ZL52:JEQ12_011521
GO:0005730	cellular_component	nucleolus	2	190	333	38825	0.485939	0.601759	1.22728	A0A6P3EF08:JEQ12_010572,A0A6P3EBE2:JEQ12_007663
GO:0005794	cellular_component	Golgi apparatus	3	190	534	38825	0.486329	0.601759	1.14799	A0A836AIM8:JEQ12_013524,A0A6P3TUJ5:JEQ12_001312,W5PFX1:GOPC
GO:0005516	molecular_function	calmodulin binding	1	190	136	38825	0.487446	0.601759	1.50252	W5PET9:CAMK2G
GO:0003824	molecular_function	catalytic activity	1	190	139	38825	0.494961	0.605676	1.47009	A0A836AA97:JEQ12_002288
GO:0016705	molecular_function	oxidoreductase activity, acting on paired donors, with incorporation or reduction of molecular oxygen	1	190	139	38825	0.494961	0.605676	1.47009	A0A835ZL52:JEQ12_011521
GO:0005737	cellular_component	cytoplasm	14	190	2797	38825	0.50508	0.61536	1.02281	P52210:ALDOB,A0A6P3E1W3:JEQ12_010021,A0A6P3YJY3:JEQ12_003123,A0A835ZIZ3:JEQ12_012856,A0A835ZKU9:JEQ12_011188,A0A835ZXC6:JEQ12_002179,A0A835ZXR4:JEQ12_002072,A0A836A0A1:JEQ12_002103,A0A6P3EGW4:FBXL4,A0A6P3T738:SHROOM4,A0A836A025:JEQ12_008509,A0A836CTF0:JEQ12_007985,A0A836CYW7:JEQ12_019120,W5Q9B2:ARHGDIA
GO:0051260	biological_process	protein homooligomerization	2	190	347	38825	0.507676	0.615834	1.17776	A0A835ZST8:JEQ12_012247,A0A835ZTK5:JEQ12_011913
GO:0005044	molecular_function	scavenger receptor activity	1	190	149	38825	0.519227	0.627118	1.37142	A0A836D8U8:JEQ12_001850
GO:0016055	biological_process	Wnt signaling pathway	1	190	152	38825	0.526278	0.630381	1.34436	W5QEF2:CHD8
GO:0031267	molecular_function	small GTPase binding	1	190	154	38825	0.530921	0.630381	1.3269	A0A6P3TJN6:SYTL3
GO:0005085	molecular_function	guanyl-nucleotide exchange factor activity	2	190	363	38825	0.531779	0.630381	1.12585	A0A6P7EDK3:JEQ12_018882,A0A836ACQ8:JEQ12_000102
GO:0016042	biological_process	lipid catabolic process	1	190	155	38825	0.533226	0.630381	1.31834	A0A835ZW35:JEQ12_010486
GO:0045893	biological_process	positive regulation of DNA-templated transcription	1	190	155	38825	0.533226	0.630381	1.31834	W5QEF2:CHD8
GO:0016740	molecular_function	transferase activity	1	190	156	38825	0.535519	0.630421	1.30989	A0A836A9P7:JEQ12_002018
GO:0061630	molecular_function	ubiquitin protein ligase activity	1	190	157	38825	0.537802	0.630448	1.30154	A0A6P3E780:JEQ12_001792
GO:0000981	molecular_function	DNA-binding transcription factor activity, RNA polymerase II-specific	2	190	379	38825	0.555071	0.64797	1.07832	A0A6P7E781:JEQ12_017607,W5PI62:EVX1
GO:0004843	molecular_function	cysteine-type deubiquitinase activity	1	190	170	38825	0.566475	0.658527	1.20201	A0A836AFP3:JEQ12_017408
GO:0005525	molecular_function	GTP binding	4	190	850	38825	0.600025	0.694634	0.96161	A0A6P7EDF3:JEQ12_018798,C5IJ93:RAB9A,A0A836A7W9:JEQ12_015917,A0A836D4Q4:JEQ12_008687
GO:0003700	molecular_function	DNA-binding transcription factor activity	3	190	646	38825	0.614638	0.708611	0.948957	A0A836A554:JEQ12_015579,A0A836CTH6:JEQ12_010473,A0A6P7E4M9:JEQ12_016067
GO:0016887	molecular_function	ATP hydrolysis activity	2	190	448	38825	0.64598	0.74115	0.912242	W5QEF2:CHD8,A0A836AA67:JEQ12_002243
GO:0006915	biological_process	apoptotic process	1	190	213	38825	0.649291	0.74115	0.959353	A0A835ZW76:JEQ12_002910
GO:0005739	cellular_component	mitochondrion	2	190	454	38825	0.653153	0.74115	0.900185	A0A836CZL5:JEQ12_018945,W5Q030:POLG2
GO:0030154	biological_process	cell differentiation	1	190	216	38825	0.654443	0.74115	0.946028	A0A836A9Q9:JEQ12_008810
GO:0000287	molecular_function	magnesium ion binding	1	190	217	38825	0.656144	0.74115	0.941669	W5P276:PKLR
GO:0006470	biological_process	protein dephosphorylation	1	190	222	38825	0.664522	0.747588	0.92046	A0A6P7EDF3:JEQ12_018798
GO:0006511	biological_process	ubiquitin-dependent protein catabolic process	1	190	228	38825	0.674309	0.754318	0.896237	A0A836AFP3:JEQ12_017408
GO:0005783	cellular_component	endoplasmic reticulum	1	190	229	38825	0.675912	0.754318	0.892324	W5QEF0:TMEM117
GO:0003677	molecular_function	DNA binding	8	190	1836	38825	0.68057	0.75649	0.89038	W5QEF2:CHD8,A0A836A554:JEQ12_015579,A0A836AKA5:JEQ12_014976,A0A836D6T4:JEQ12_000264,A0A6P7E4M9:JEQ12_016067,A0A6P7E781:JEQ12_017607,A0A836CT77:JEQ12_007745,W5PI62:EVX1
GO:0046872	molecular_function	metal ion binding	13	190	2961	38825	0.697651	0.772399	0.897145	A0A6P3DZ22:JEQ12_000549,A0A6P3TRY4:JEQ12_016258,A0A835ZT30:JEQ12_006225,A0A836A510:JEQ12_004162,A0A836A9P7:JEQ12_002018,A0A836D1R7:JEQ12_018401,A0A836D6T4:JEQ12_000264,A0A835ZQK8:JEQ12_007134,A0A835ZWR8:JEQ12_003300,A0A836A900:JEQ12_016771,A0A836CSU1:JEQ12_008441,W5PN58:,W5Q2X5:HELZ
GO:0008017	molecular_function	microtubule binding	1	190	253	38825	0.712121	0.783769	0.807676	A0A836A025:JEQ12_008509
GO:0016491	molecular_function	oxidoreductase activity	1	190	254	38825	0.713539	0.783769	0.804496	W5PLD3:
GO:0031090	cellular_component	organelle membrane	1	190	261	38825	0.723273	0.791345	0.78292	A0A6P7EDF3:JEQ12_018798
GO:0005874	cellular_component	microtubule	1	190	270	38825	0.735305	0.801368	0.756823	A0A836A025:JEQ12_008509
GO:0006886	biological_process	intracellular protein transport	1	190	282	38825	0.750543	0.814792	0.724617	A0A6P3TJN6:SYTL3
GO:0035556	biological_process	intracellular signal transduction	1	190	319	38825	0.792246	0.856731	0.640571	A0A6P3EAU7:JEQ12_013789
GO:0043565	molecular_function	sequence-specific DNA binding	1	190	347	38825	0.819125	0.879408	0.588882	A0A0F7YC43:RORA
GO:0003723	molecular_function	RNA binding	4	190	1155	38825	0.819863	0.879408	0.707678	A0A6P3E1W3:JEQ12_010021,A0A6P3TRY4:JEQ12_016258,A0A836A900:JEQ12_016771,A0A836D748:JEQ12_009706
GO:0005179	molecular_function	hormone activity	1	190	351	38825	0.822672	0.879408	0.582171	A0A836CU25:JEQ12_006747
GO:0000139	cellular_component	Golgi membrane	1	190	358	38825	0.828712	0.882483	0.570788	A0A6P3T242:JEQ12_007427
GO:0015031	biological_process	protein transport	1	190	363	38825	0.832901	0.883572	0.562926	A0A836A2J9:JEQ12_005537
GO:0004674	molecular_function	protein serine/threonine kinase activity	1	190	373	38825	0.840975	0.888758	0.547834	A0A836CY36:JEQ12_002997
GO:0005789	cellular_component	endoplasmic reticulum membrane	2	190	678	38825	0.846697	0.891428	0.602779	W5P0B1:ERO1B,A0A6P3EDG1:JEQ12_002825
GO:0004672	molecular_function	protein kinase activity	1	190	391	38825	0.854544	0.896307	0.522614	A0A835ZXR4:JEQ12_002072
GO:0005829	cellular_component	cytosol	2	190	704	38825	0.861306	0.900016	0.580517	A0A836ABD9:JEQ12_018624,W5NPH3:
GO:0006508	biological_process	proteolysis	3	190	1021	38825	0.879013	0.914064	0.600418	A0A836CYW8:JEQ12_002341,A0A836D8U8:JEQ12_001850,A0A835ZWK7:JEQ12_007886
GO:0005654	cellular_component	nucleoplasm	1	190	432	38825	0.881302	0.914064	0.473014	A0A6P3EF08:JEQ12_010572
GO:0042613	cellular_component	MHC class II protein complex	3	190	1040	38825	0.886604	0.916157	0.589448	A0A1Y5U0U0:DQB1,A0A377TEY1:MHC,F8T894:DQB
GO:0005634	cellular_component	nucleus	15	190	4106	38825	0.911695	0.937954	0.746501	A0A6P7EDF3:JEQ12_018798,A0A0F7YC43:RORA,A0A6P3DZ22:JEQ12_000549,A0A6P3E1W3:JEQ12_010021,A0A6P3E4P6:JEQ12_001136,A0A6P7E0V3:JEQ12_015859,A0A835ZXC6:JEQ12_002179,A0A836A554:JEQ12_015579,A0A836AKA5:JEQ12_014976,A0A836CTH6:JEQ12_010473,A0A6P3TJP9:SGF29,A0A6P7E4M9:JEQ12_016067,A0A6P7E781:JEQ12_017607,A0A836CT77:JEQ12_007745,W5PI62:EVX1
GO:0006468	biological_process	protein phosphorylation	3	190	1121	38825	0.914421	0.937954	0.546857	A0A836CY36:JEQ12_002997,A0A835ZXR4:JEQ12_002072,W5PET9:CAMK2G
GO:0005524	molecular_function	ATP binding	10	190	2973	38825	0.922975	0.941154	0.687326	W5QEF2:CHD8,A0A6P7EDF3:JEQ12_018798,A0A836CY36:JEQ12_002997,A0A6P3E6W2:JEQ12_001515,A0A835ZXR4:JEQ12_002072,A0A836AA67:JEQ12_002243,A0A836CTY7:JEQ12_008213,W5P276:PKLR,W5PET9:CAMK2G,A0A836A0K4:JEQ12_002268
GO:0006955	biological_process	immune response	3	190	1163	38825	0.926273	0.941154	0.527108	A0A836CTN1:JEQ12_010562,A0A2P9DU16:Class,A0A836D206:JEQ12_003341
GO:0019882	biological_process	antigen processing and presentation	2	190	868	38825	0.927661	0.941154	0.470834	A0A836CTN1:JEQ12_010562,A0A2P9DU16:Class
GO:0003924	molecular_function	GTPase activity	1	190	573	38825	0.941103	0.951333	0.356618	C5IJ93:RAB9A
GO:0006355	biological_process	regulation of DNA-templated transcription	1	190	815	38825	0.982417	0.98951	0.250727	W5P3A4:CASZ1
GO:0005886	cellular_component	plasma membrane	6	190	3417	38825	0.999459	0.999829	0.35881	A0A6P3E7M5:JEQ12_001603,A0A835ZRC9:JEQ12_007588,A0A836D626:JEQ12_010142,Q95LG2:,W5PRU0:RHAG,W5QEF0:TMEM117
GO:0004930	molecular_function	G protein-coupled receptor activity	1	190	1728	38825	0.999829	0.999829	0.118254	W5P3D9:HCAR2

## Sheet: MvsMF
id	Category	Term	ListHits	ListTotal	PopHits	PopTotal	p-value	padjust	Enrichment_score	proteins
GO:0004602	molecular_function	glutathione peroxidase activity	2	142	23	38825	0.00319541	0.0945766	23.7753	A0A836AIL0:JEQ12_015828,A0A6P7E783:JEQ12_000335
GO:0004060	molecular_function	arylamine N-acetyltransferase activity	1	142	1	38825	0.00365744	0.0945766	273.415	A0A6P7DI25:LOC101120889
GO:0014037	biological_process	Schwann cell differentiation	1	142	1	38825	0.00365744	0.0945766	273.415	W5NTH3:ADGRG6
GO:0021508	biological_process	floor plate formation	1	142	1	38825	0.00365744	0.0945766	273.415	W5NUY0:CLUAP1
GO:0048681	biological_process	negative regulation of axon regeneration	1	142	1	38825	0.00365744	0.0945766	273.415	W5PY63:KLK8
GO:0006636	biological_process	unsaturated fatty acid biosynthetic process	2	142	26	38825	0.00407542	0.0945766	21.032	A0A836CV65:JEQ12_006589,A0A836CWG2:JEQ12_006587
GO:0004452	molecular_function	isopentenyl-diphosphate delta-isomerase activity	1	142	2	38825	0.00730159	0.0945766	136.708	W5PZH4:LOC101108851
GO:0004797	molecular_function	thymidine kinase activity	1	142	2	38825	0.00730159	0.0945766	136.708	A0A835ZXI9:JEQ12_002496
GO:0018025	molecular_function	calmodulin-lysine N-methyltransferase activity	1	142	2	38825	0.00730159	0.0945766	136.708	A0A836AKD8:JEQ12_014005
GO:0031642	biological_process	negative regulation of myelination	1	142	2	38825	0.00730159	0.0945766	136.708	W5PY63:KLK8
GO:0043175	molecular_function	RNA polymerase core enzyme binding	1	142	2	38825	0.00730159	0.0945766	136.708	A0A6P3DZ22:JEQ12_000549
GO:0050480	molecular_function	imidazolonepropionase activity	1	142	2	38825	0.00730159	0.0945766	136.708	A0A6P3E3E9:JEQ12_014689
GO:0050992	biological_process	dimethylallyl diphosphate biosynthetic process	1	142	2	38825	0.00730159	0.0945766	136.708	W5PZH4:LOC101108851
GO:0097542	cellular_component	ciliary tip	1	142	2	38825	0.00730159	0.0945766	136.708	W5NUY0:CLUAP1
GO:1990112	cellular_component	RQC complex	1	142	2	38825	0.00730159	0.0945766	136.708	A0A836AH65:JEQ12_001233
GO:1990116	biological_process	ribosome-associated ubiquitin-dependent protein catabolic process	1	142	2	38825	0.00730159	0.0945766	136.708	A0A836AH65:JEQ12_001233
GO:0005882	cellular_component	intermediate filament	4	142	222	38825	0.00914287	0.0945766	4.92641	B0LKP1:KRT35,A0A836AEG4:JEQ12_001210,A0A836AEU3:JEQ12_001212,A0A836D7R2:JEQ12_001209
GO:0001947	biological_process	heart looping	1	142	3	38825	0.0109325	0.0945766	91.1385	W5NUY0:CLUAP1
GO:0004308	molecular_function	exo-alpha-sialidase activity	1	142	3	38825	0.0109325	0.0945766	91.1385	A0A835ZW35:JEQ12_010486
GO:0005883	cellular_component	neurofilament	1	142	3	38825	0.0109325	0.0945766	91.1385	W5P2D4:NEFH
GO:0019933	biological_process	cAMP-mediated signaling	1	142	3	38825	0.0109325	0.0945766	91.1385	W5NTH3:ADGRG6
GO:0050807	biological_process	regulation of synapse organization	1	142	3	38825	0.0109325	0.0945766	91.1385	W5PY63:KLK8
GO:0005201	molecular_function	extracellular matrix structural constituent	2	142	45	38825	0.0118645	0.0945766	12.1518	A0A836AHQ9:JEQ12_013386,A0A836D5E3:JEQ12_009437
GO:0003980	molecular_function	UDP-glucose:glycoprotein glucosyltransferase activity	1	142	4	38825	0.0145502	0.0945766	68.3539	A0A836A6H3:JEQ12_002272
GO:0008134	molecular_function	transcription factor binding	1	142	4	38825	0.0145502	0.0945766	68.3539	W5Q7Z8:SUMO1
GO:0008612	biological_process	peptidyl-lysine modification to peptidyl-hypusine	1	142	4	38825	0.0145502	0.0945766	68.3539	A0A6P3EDJ4:JEQ12_016269
GO:0019200	molecular_function	carbohydrate kinase activity	1	142	4	38825	0.0145502	0.0945766	68.3539	A0A6P7DHP6:JEQ12_013291
GO:0030991	cellular_component	intraciliary transport particle A	1	142	4	38825	0.0145502	0.0945766	68.3539	W5NUY0:CLUAP1
GO:0048812	biological_process	neuron projection morphogenesis	1	142	4	38825	0.0145502	0.0945766	68.3539	W5PY63:KLK8
GO:0050808	biological_process	synapse organization	1	142	4	38825	0.0145502	0.0945766	68.3539	W5PY63:KLK8
GO:0072344	biological_process	rescue of stalled ribosome	1	142	4	38825	0.0145502	0.0945766	68.3539	A0A836AH65:JEQ12_001233
GO:0072487	cellular_component	MSL complex	1	142	4	38825	0.0145502	0.0945766	68.3539	A0A6P3E780:JEQ12_001792
GO:0004697	molecular_function	protein kinase C activity	1	142	5	38825	0.0181548	0.104895	54.6831	A0A836A333:JEQ12_018353
GO:0007613	biological_process	memory	1	142	5	38825	0.0181548	0.104895	54.6831	W5PY63:KLK8
GO:0034080	biological_process	CENP-A containing chromatin assembly	1	142	5	38825	0.0181548	0.104895	54.6831	W5PEF0:CENPP
GO:0042552	biological_process	myelination	1	142	5	38825	0.0181548	0.104895	54.6831	W5NTH3:ADGRG6
GO:0006851	biological_process	mitochondrial calcium ion transmembrane transport	1	142	6	38825	0.0217463	0.113081	45.5692	A0A835ZLG6:JEQ12_013181
GO:0043616	biological_process	keratinocyte proliferation	1	142	6	38825	0.0217463	0.113081	45.5692	W5PY63:KLK8
GO:0061564	biological_process	axon development	1	142	6	38825	0.0217463	0.113081	45.5692	W5P2D4:NEFH
GO:0102007	molecular_function	acyl-L-homoserine-lactone lactonohydrolase activity	1	142	6	38825	0.0217463	0.113081	45.5692	W5NY46:PON1
GO:0006493	biological_process	protein O-linked glycosylation	1	142	7	38825	0.0253248	0.128477	39.0594	A0A6P7DHP6:JEQ12_013291
GO:0004064	molecular_function	arylesterase activity	1	142	8	38825	0.0288902	0.140871	34.1769	W5NY46:PON1
GO:0008219	biological_process	cell death	1	142	9	38825	0.0324427	0.140871	30.3795	W5PY63:KLK8
GO:0019556	biological_process	histidine catabolic process to glutamate and formamide	1	142	9	38825	0.0324427	0.140871	30.3795	A0A6P3E3E9:JEQ12_014689
GO:0019557	biological_process	histidine catabolic process to glutamate and formate	1	142	9	38825	0.0324427	0.140871	30.3795	A0A6P3E3E9:JEQ12_014689
GO:0030992	cellular_component	intraciliary transport particle B	1	142	9	38825	0.0324427	0.140871	30.3795	W5NUY0:CLUAP1
GO:0043023	molecular_function	ribosomal large subunit binding	1	142	9	38825	0.0324427	0.140871	30.3795	A0A836AH65:JEQ12_001233
GO:0055085	biological_process	transmembrane transport	2	142	77	38825	0.0325088	0.140871	7.1017	A0A6P3E217:JEQ12_013519,A0A6P7E255:JEQ12_016042
GO:0006898	biological_process	receptor-mediated endocytosis	1	142	10	38825	0.0359823	0.143929	27.3415	A0A835ZN47:JEQ12_013186
GO:0008028	molecular_function	monocarboxylic acid transmembrane transporter activity	1	142	10	38825	0.0359823	0.143929	27.3415	A0A6P3E392:SLC16A7
GO:0008420	molecular_function	RNA polymerase II CTD heptapeptide repeat phosphatase activity	1	142	10	38825	0.0359823	0.143929	27.3415	A0A6P3DZ22:JEQ12_000549
GO:0097546	cellular_component	ciliary base	1	142	10	38825	0.0359823	0.143929	27.3415	W5NUY0:CLUAP1
GO:0045095	cellular_component	keratin filament	3	142	202	38825	0.038302	0.144174	4.06063	A0A1W6S9X2:KRTAP15-1,A0A6P3E7K8:JEQ12_001216,A0A836D8L1:JEQ12_001191
GO:0001965	molecular_function	G-protein alpha-subunit binding	1	142	11	38825	0.0395091	0.144174	24.856	A0A6P7DDH3:JEQ12_011708
GO:0030705	biological_process	cytoskeleton-dependent intracellular transport	1	142	11	38825	0.0395091	0.144174	24.856	A0A836CTF0:JEQ12_007985
GO:0031083	cellular_component	BLOC-1 complex	1	142	11	38825	0.0395091	0.144174	24.856	W5NRJ2:SNAPIN
GO:0045727	biological_process	positive regulation of translation	1	142	11	38825	0.0395091	0.144174	24.856	A0A6P3EAD1:GUF1
GO:0035082	biological_process	axoneme assembly	1	142	12	38825	0.043023	0.151674	22.7846	W5NUY0:CLUAP1
GO:0071897	biological_process	DNA biosynthetic process	1	142	12	38825	0.043023	0.151674	22.7846	A0A835ZXI9:JEQ12_002496
GO:0001843	biological_process	neural tube closure	1	142	13	38825	0.0465242	0.153653	21.032	W5NUY0:CLUAP1
GO:0031532	biological_process	actin cytoskeleton reorganization	1	142	13	38825	0.0465242	0.153653	21.032	A0A836ALJ4:JEQ12_015222
GO:0051382	biological_process	kinetochore assembly	1	142	13	38825	0.0465242	0.153653	21.032	A0A6P7EIU6:JEQ12_002560
GO:0007165	biological_process	signal transduction	5	142	537	38825	0.0479129	0.153653	2.54577	A0A6P3EIS0:JEQ12_002837,A0A6P3T904:JEQ12_009549,A0A835ZV86:JEQ12_003518,A0A836AG62:JEQ12_016161,A0A836D9Q2:JEQ12_000503
GO:0007224	biological_process	smoothened signaling pathway	1	142	14	38825	0.0500126	0.153653	19.5297	W5NUY0:CLUAP1
GO:0009611	biological_process	response to wounding	1	142	14	38825	0.0500126	0.153653	19.5297	W5PY63:KLK8
GO:0015095	molecular_function	magnesium ion transmembrane transporter activity	1	142	14	38825	0.0500126	0.153653	19.5297	A0A6P7DNV9:JEQ12_009387
GO:0031011	cellular_component	Ino80 complex	1	142	14	38825	0.0500126	0.153653	19.5297	A0A836D7I7:JEQ12_014116
GO:0030670	cellular_component	phagocytic vesicle membrane	2	142	98	38825	0.0502669	0.153653	5.57991	Q4LBE4:ovar-MHCI-E2,R9WDM9:OLA-I
GO:0016787	molecular_function	hydrolase activity	4	142	379	38825	0.0509714	0.153653	2.88565	A0A6P3EMM5:HARBI1,A0A835ZKJ6:JEQ12_011835,A0A835ZR38:JEQ12_011959,A0A836A1E8:JEQ12_004997
GO:0031146	biological_process	SCF-dependent proteasomal ubiquitin-dependent protein catabolic process	1	142	15	38825	0.0534884	0.156698	18.2277	A0A6P3YRZ5:JEQ12_007947
GO:1902475	biological_process	L-alpha-amino acid transmembrane transport	1	142	15	38825	0.0534884	0.156698	18.2277	A0A836A0D7:JEQ12_006460
GO:0006825	biological_process	copper ion transport	1	142	16	38825	0.0569516	0.164527	17.0885	A0A6P3E0G2:JEQ12_001713
GO:0006488	biological_process	dolichol-linked oligosaccharide biosynthetic process	1	142	17	38825	0.0604021	0.169779	16.0833	W5PZH6:MPDU1
GO:0016925	biological_process	protein sumoylation	1	142	17	38825	0.0604021	0.169779	16.0833	W5Q7Z8:SUMO1
GO:0003755	molecular_function	peptidyl-prolyl cis-trans isomerase activity	2	142	111	38825	0.0626345	0.173405	4.92641	A0A6P7DH09:JEQ12_013007,A0A836CXT9:JEQ12_002755
GO:0005509	molecular_function	calcium ion binding	8	142	1159	38825	0.0633597	0.173405	1.88725	A0A6P3E217:JEQ12_013519,A0A835ZYY8:JEQ12_007125,A0A836CXT9:JEQ12_002755,A0A6P7D1L7:JEQ12_007317,A0A835ZLG6:JEQ12_013181,A0A835ZLH3:JEQ12_011908,A0A836CR68:JEQ12_011563,W5PUL9:RCN3
GO:0016491	molecular_function	oxidoreductase activity	3	142	254	38825	0.0667784	0.177105	3.22932	A0A6P3E0G2:JEQ12_001713,A0A6P7EF70:JEQ12_002423,W5PMM4:LOC106990122
GO:0019005	cellular_component	SCF ubiquitin ligase complex	1	142	19	38825	0.0672657	0.177105	14.3903	A0A6P3YRZ5:JEQ12_007947
GO:0061608	molecular_function	nuclear import signal receptor activity	1	142	19	38825	0.0672657	0.177105	14.3903	A0A836CYL9:JEQ12_002056
GO:0007094	biological_process	mitotic spindle assembly checkpoint signaling	1	142	20	38825	0.0706788	0.179283	13.6708	A0A836ACM1:JEQ12_014212
GO:0008299	biological_process	isoprenoid biosynthetic process	1	142	20	38825	0.0706788	0.179283	13.6708	W5PZH4:LOC101108851
GO:0016514	cellular_component	SWI/SNF complex	1	142	20	38825	0.0706788	0.179283	13.6708	A0A6P3EE85:JEQ12_012530
GO:0016409	molecular_function	palmitoyltransferase activity	1	142	21	38825	0.0740794	0.185645	13.0198	A0A836A0E6:JEQ12_002163
GO:0110165	cellular_component	cellular anatomical entity	3	142	271	38825	0.0776991	0.191085	3.02674	A0A836AFC9:JEQ12_001497,A0A836D8Q5:JEQ12_001386,W5QBU1:NTNG1
GO:0006695	biological_process	cholesterol biosynthetic process	1	142	23	38825	0.0808438	0.191085	11.8876	W5PZH4:LOC101108851
GO:0006953	biological_process	acute-phase response	1	142	23	38825	0.0808438	0.191085	11.8876	A0A835ZLT0:JEQ12_010976
GO:0008277	biological_process	regulation of G protein-coupled receptor signaling pathway	1	142	23	38825	0.0808438	0.191085	11.8876	A0A6P7DDH3:JEQ12_011708
GO:0098656	biological_process	monoatomic anion transmembrane transport	1	142	23	38825	0.0808438	0.191085	11.8876	A0A836A0D7:JEQ12_006460
GO:0000124	cellular_component	SAGA complex	1	142	26	38825	0.0908984	0.210076	10.516	A0A836D4F8:JEQ12_013753
GO:0006749	biological_process	glutathione metabolic process	1	142	26	38825	0.0908984	0.210076	10.516	A0A836AIL0:JEQ12_015828
GO:0016705	molecular_function	oxidoreductase activity, acting on paired donors, with incorporation or reduction of molecular oxygen	2	142	139	38825	0.0922086	0.210763	3.93404	A0A836CV65:JEQ12_006589,A0A836CWG2:JEQ12_006587
GO:0034364	cellular_component	high-density lipoprotein particle	1	142	27	38825	0.0942256	0.213032	10.1265	A0A835ZLT0:JEQ12_010976
GO:0005003	molecular_function	ephrin receptor activity	1	142	28	38825	0.0975407	0.215835	9.76484	A0A836D765:JEQ12_010125
GO:0043022	molecular_function	ribosome binding	1	142	28	38825	0.0975407	0.215835	9.76484	A0A6P3EAD1:GUF1
GO:0005669	cellular_component	transcription factor TFIID complex	1	142	30	38825	0.104135	0.228001	9.11385	A0A6P7D8F4:JEQ12_010355
GO:0061630	molecular_function	ubiquitin protein ligase activity	2	142	157	38825	0.112951	0.244728	3.483	A0A836AH65:JEQ12_001233,A0A6P3E780:JEQ12_001792
GO:0042157	biological_process	lipoprotein metabolic process	1	142	35	38825	0.120412	0.258202	7.81187	A0A6P3EK75:JEQ12_005950
GO:0003950	molecular_function	NAD+ ADP-ribosyltransferase activity	1	142	38	38825	0.130036	0.275996	7.19514	A0A6P3TN32:JEQ12_015768
GO:0032012	biological_process	regulation of ARF protein signal transduction	1	142	39	38825	0.133221	0.279899	7.01065	W5PP11:ARFGEF2
GO:0004864	molecular_function	protein phosphatase inhibitor activity	1	142	40	38825	0.136395	0.283701	6.83539	A0A6P3EIS0:JEQ12_002837
GO:0006811	biological_process	monoatomic ion transport	1	142	42	38825	0.142707	0.289735	6.50989	A0A836AJL8:JEQ12_014184
GO:0010960	biological_process	magnesium ion homeostasis	1	142	42	38825	0.142707	0.289735	6.50989	A0A836AJL8:JEQ12_014184
GO:0007156	biological_process	homophilic cell adhesion via plasma membrane adhesion molecules	2	142	182	38825	0.143475	0.289735	3.00457	A0A835ZYY8:JEQ12_007125,A0A835ZLH3:JEQ12_011908
GO:0006338	biological_process	chromatin remodeling	1	142	43	38825	0.145846	0.291692	6.3585	A0A836D7I7:JEQ12_014116
GO:0004722	molecular_function	protein serine/threonine phosphatase activity	1	142	44	38825	0.148973	0.295109	6.21399	A0A835ZZX2:JEQ12_003374
GO:0003924	molecular_function	GTPase activity	4	142	573	38825	0.158952	0.305136	1.90866	A0A6P3EAD1:GUF1,A0A6P3EI01:JEQ12_002323,A0A836D8Q5:JEQ12_001386,W5PRW5:RAB37
GO:0004869	molecular_function	cysteine-type endopeptidase inhibitor activity	1	142	48	38825	0.16137	0.305136	5.69616	W5QH50:HRG
GO:0005788	cellular_component	endoplasmic reticulum lumen	1	142	48	38825	0.16137	0.305136	5.69616	A0A836A6H3:JEQ12_002272
GO:0006606	biological_process	protein import into nucleus	1	142	48	38825	0.16137	0.305136	5.69616	A0A836CYL9:JEQ12_002056
GO:0006633	biological_process	fatty acid biosynthetic process	1	142	48	38825	0.16137	0.305136	5.69616	A0A6P7EF70:JEQ12_002423
GO:0000775	cellular_component	chromosome, centromeric region	1	142	49	38825	0.164441	0.30539	5.57991	W5PEF0:CENPP
GO:0003746	molecular_function	translation elongation factor activity	1	142	49	38825	0.164441	0.30539	5.57991	A0A836D8Q5:JEQ12_001386
GO:0004364	molecular_function	glutathione transferase activity	1	142	51	38825	0.17055	0.313932	5.36109	A0A836AIL0:JEQ12_015828
GO:0071949	molecular_function	FAD binding	1	142	53	38825	0.176614	0.322243	5.15878	A0A836AHD4:JEQ12_000014
GO:0005262	molecular_function	calcium channel activity	1	142	58	38825	0.191583	0.346514	4.71406	A0A836CZD4:JEQ12_003009
GO:0005777	cellular_component	peroxisome	1	142	59	38825	0.194544	0.348837	4.63416	W5PZH4:LOC101108851
GO:0010468	biological_process	regulation of gene expression	1	142	60	38825	0.197494	0.351101	4.55692	W5P343:AFF1
GO:0006979	biological_process	response to oxidative stress	1	142	61	38825	0.200434	0.351883	4.48222	A0A6P7E783:JEQ12_000335
GO:0005525	molecular_function	GTP binding	5	142	850	38825	0.201318	0.351883	1.60833	A0A6P3EAD1:GUF1,A0A6P3EI01:JEQ12_002323,A0A836D6N7:JEQ12_015877,A0A836D8Q5:JEQ12_001386,W5PRW5:RAB37
GO:0051726	biological_process	regulation of cell cycle	1	142	62	38825	0.203363	0.352495	4.40993	A0A836CWK4:JEQ12_004438
GO:0000776	cellular_component	kinetochore	1	142	66	38825	0.214972	0.369539	4.14266	A0A836ACM1:JEQ12_014212
GO:0019236	biological_process	response to pheromone	1	142	68	38825	0.220714	0.376299	4.02082	A0A835ZY26:JEQ12_002237
GO:0000413	biological_process	protein peptidyl-prolyl isomerization	1	142	69	38825	0.223569	0.378068	3.96254	A0A6P7DH09:JEQ12_013007
GO:0043130	molecular_function	ubiquitin binding	1	142	70	38825	0.226414	0.378442	3.90594	A0A6P7EQH6:JEQ12_004991
GO:0006468	biological_process	protein phosphorylation	6	142	1121	38825	0.228274	0.378442	1.46342	A0A6P7DHP6:JEQ12_013291,A0A6P7E4N6:JEQ12_016783,A0A836A333:JEQ12_018353,A0A836ACM1:JEQ12_014212,A0A836D765:JEQ12_010125,W5P080:WNK4
GO:0140658	molecular_function	ATP-dependent chromatin remodeler activity	1	142	71	38825	0.229249	0.378442	3.85092	A0A835ZK84:JEQ12_013064
GO:0046982	molecular_function	protein heterodimerization activity	2	142	254	38825	0.238001	0.389796	2.15288	A0A6P7D8F4:JEQ12_010355,A0A836D4F8:JEQ12_013753
GO:0005829	cellular_component	cytosol	4	142	704	38825	0.257503	0.415608	1.5535	A0A836AH65:JEQ12_001233,A0A1W6S9X2:KRTAP15-1,A0A6P3E7K8:JEQ12_001216,A0A836D8L1:JEQ12_001191
GO:0005743	cellular_component	mitochondrial inner membrane	4	142	705	38825	0.258302	0.415608	1.55129	A0A6P3EAD1:GUF1,A0A6P3E217:JEQ12_013519,A0A8V6WJ47:NDUFS5,A0A6P7E255:JEQ12_016042
GO:0008237	molecular_function	metallopeptidase activity	1	142	82	38825	0.259755	0.415608	3.33434	A0A6P3YHD7:JEQ12_008690
GO:0015293	molecular_function	symporter activity	1	142	86	38825	0.270548	0.429573	3.17925	A0A836A0D7:JEQ12_006460
GO:0006886	biological_process	intracellular protein transport	2	142	282	38825	0.275846	0.434667	1.93912	A0A6P3TJN6:SYTL3,W5NRJ2:SNAPIN
GO:0005507	molecular_function	copper ion binding	1	142	93	38825	0.289062	0.452067	2.93995	A0A6P3E0G2:JEQ12_001713
GO:0009986	cellular_component	cell surface	1	142	96	38825	0.296853	0.457954	2.84808	W5NTH3:ADGRG6
GO:0005576	cellular_component	extracellular region	8	142	1728	38825	0.298659	0.457954	1.26581	Q9XSM2:,A0A6P3EK75:JEQ12_005950,W5NY46:PON1,A0A6P3E0G2:JEQ12_001713,A0A835ZSK1:JEQ12_013054,A0A836A5W6:JEQ12_016393,A0A836D7I1:JEQ12_010126,A0A836D9E9:JEQ12_010128
GO:0006897	biological_process	endocytosis	1	142	97	38825	0.299431	0.457954	2.81872	A0A6P3T904:JEQ12_009549
GO:0005759	cellular_component	mitochondrial matrix	1	142	102	38825	0.312182	0.473969	2.68054	A0A6P3EAD1:GUF1
GO:0006364	biological_process	rRNA processing	1	142	104	38825	0.317217	0.478124	2.629	A0A836CS21:JEQ12_011814
GO:0005813	cellular_component	centrosome	1	142	105	38825	0.319721	0.478431	2.60396	W5NUY0:CLUAP1
GO:0006869	biological_process	lipid transport	1	142	107	38825	0.324701	0.482414	2.55528	A0A6P3EK75:JEQ12_005950
GO:0003743	molecular_function	translation initiation factor activity	1	142	108	38825	0.327178	0.482646	2.53162	A0A835ZQJ3:JEQ12_007258
GO:0032259	biological_process	methylation	1	142	118	38825	0.351454	0.514806	2.31708	A0A836AKD8:JEQ12_014005
GO:0006457	biological_process	protein folding	1	142	121	38825	0.358566	0.52025	2.25963	A0A6P7DH09:JEQ12_013007
GO:0004252	molecular_function	serine-type endopeptidase activity	2	142	345	38825	0.360173	0.52025	1.58502	Q9XSM2:,W5PY63:KLK8
GO:0035091	molecular_function	phosphatidylinositol binding	1	142	123	38825	0.363264	0.521096	2.22289	A0A836AIJ9:JEQ12_008725
GO:0005765	cellular_component	lysosomal membrane	1	142	126	38825	0.370247	0.526831	2.16996	W5P743:GLMP
GO:0016579	biological_process	protein deubiquitination	1	142	127	38825	0.372558	0.526831	2.15288	A0A6P3ENR6:JEQ12_007398
GO:0048471	cellular_component	perinuclear region of cytoplasm	1	142	128	38825	0.37486	0.526831	2.13606	W5PP11:ARFGEF2
GO:0015031	biological_process	protein transport	2	142	363	38825	0.383688	0.535618	1.50642	W5PP11:ARFGEF2,A0A836AIJ9:JEQ12_008725
GO:0140359	molecular_function	ABC-type transporter activity	1	142	134	38825	0.388499	0.538719	2.04041	A0A836ABN9:JEQ12_002244
GO:0004674	molecular_function	protein serine/threonine kinase activity	2	142	373	38825	0.396594	0.546302	1.46603	A0A6P7E4N6:JEQ12_016783,W5P080:WNK4
GO:0003824	molecular_function	catalytic activity	1	142	139	38825	0.399639	0.546875	1.96702	A0A836AHD4:JEQ12_000014
GO:0004672	molecular_function	protein kinase activity	2	142	391	38825	0.419508	0.569053	1.39854	A0A6P7DHP6:JEQ12_013291,A0A836ACM1:JEQ12_014212
GO:0005044	molecular_function	scavenger receptor activity	1	142	149	38825	0.421318	0.569053	1.835	A0A835ZN47:JEQ12_013186
GO:0016055	biological_process	Wnt signaling pathway	1	142	152	38825	0.427669	0.571276	1.79879	A0A6P7E4N6:JEQ12_016783
GO:0031267	molecular_function	small GTPase binding	1	142	154	38825	0.431864	0.571276	1.77543	A0A6P3TJN6:SYTL3
GO:0006629	biological_process	lipid metabolic process	1	142	155	38825	0.43395	0.571276	1.76397	A0A836AAA0:JEQ12_002930
GO:0016042	biological_process	lipid catabolic process	1	142	155	38825	0.43395	0.571276	1.76397	A0A835ZW35:JEQ12_010486
GO:0005737	cellular_component	cytoplasm	11	142	2797	38825	0.446765	0.584447	1.07528	A0A6P3E3E9:JEQ12_014689,A0A6P3EMM5:HARBI1,A0A836A333:JEQ12_018353,A0A836CYL9:JEQ12_002056,W5NTH3:ADGRG6,W5PY63:KLK8,A0A6P3T904:JEQ12_009549,A0A6P3TNJ8:JEQ12_005422,A0A835ZY77:JEQ12_010304,A0A836AKD8:JEQ12_014005,A0A836CTF0:JEQ12_007985
GO:0005789	cellular_component	endoplasmic reticulum membrane	3	142	678	38825	0.452287	0.587973	1.2098	A0A6P7DHP6:JEQ12_013291,A0A836CV65:JEQ12_006589,A0A836CWG2:JEQ12_006587
GO:0004843	molecular_function	cysteine-type deubiquitinase activity	1	142	170	38825	0.464346	0.5999	1.60833	A0A6P3ENR6:JEQ12_007398
GO:0005654	cellular_component	nucleoplasm	2	142	432	38825	0.469986	0.600105	1.26581	W5NUY0:CLUAP1,W5PEF0:CENPP
GO:0007166	biological_process	cell surface receptor signaling pathway	1	142	175	38825	0.474113	0.600105	1.56237	W5NTH3:ADGRG6
GO:0005856	cellular_component	cytoskeleton	2	142	436	38825	0.474772	0.600105	1.2542	A0A6P3T904:JEQ12_009549,W5PK85:EML2
GO:0007186	biological_process	G protein-coupled receptor signaling pathway	1	142	176	38825	0.476045	0.600105	1.5535	A0A835ZY26:JEQ12_002237
GO:0006281	biological_process	DNA repair	1	142	193	38825	0.507833	0.634764	1.41666	A0A6P7EIU6:JEQ12_002560
GO:0004867	molecular_function	serine-type endopeptidase inhibitor activity	1	142	194	38825	0.509642	0.634764	1.40936	W5PHI7:LOC101116892
GO:0046872	molecular_function	metal ion binding	11	142	2961	38825	0.523801	0.648516	1.01573	A0A6P3DZ22:JEQ12_000549,A0A6P3EMM5:HARBI1,A0A835ZZX2:JEQ12_003374,W5NY46:PON1,A0A6P3T6A0:RNF34,A0A6P3TN32:JEQ12_015768,A0A6P7EQH6:JEQ12_004991,A0A836AFK7:JEQ12_017575,A0A836CSU1:JEQ12_008441,A0A836CU99:JEQ12_012041,A0A836D5E3:JEQ12_009437
GO:0008289	molecular_function	lipid binding	1	142	205	38825	0.529111	0.651214	1.33373	A0A6P3EK75:JEQ12_005950
GO:0006915	biological_process	apoptotic process	1	142	213	38825	0.542786	0.664115	1.28364	A0A6P3T6A0:RNF34
GO:0006470	biological_process	protein dephosphorylation	1	142	222	38825	0.5577	0.674288	1.2316	A0A835ZZX2:JEQ12_003374
GO:0016310	biological_process	phosphorylation	1	142	224	38825	0.560948	0.674288	1.2206	A0A835ZXI9:JEQ12_002496
GO:0006511	biological_process	ubiquitin-dependent protein catabolic process	1	142	228	38825	0.567374	0.674288	1.19919	A0A6P3ENR6:JEQ12_007398
GO:0005783	cellular_component	endoplasmic reticulum	1	142	229	38825	0.568965	0.674288	1.19395	A0A836CXT9:JEQ12_002755
GO:0005096	molecular_function	GTPase activator activity	1	142	230	38825	0.570551	0.674288	1.18876	A0A6P7DDH3:JEQ12_011708
GO:0006486	biological_process	protein glycosylation	1	142	230	38825	0.570551	0.674288	1.18876	A0A836A6H3:JEQ12_002272
GO:0005794	cellular_component	Golgi apparatus	2	142	534	38825	0.583451	0.685638	1.02403	W5PP11:ARFGEF2,W5QFP3:GOLGB1
GO:0005874	cellular_component	microtubule	1	142	270	38825	0.62945	0.735538	1.01265	A0A835ZV86:JEQ12_003518
GO:0022857	molecular_function	transmembrane transporter activity	1	142	276	38825	0.637564	0.739821	0.990636	A0A836AJL8:JEQ12_014184
GO:0070469	cellular_component	respirasome	1	142	278	38825	0.64023	0.739821	0.983509	A0A8V6WJ47:NDUFS5
GO:0005524	molecular_function	ATP binding	10	142	2973	38825	0.654326	0.751932	0.919662	A0A6P7DHP6:JEQ12_013291,A0A6P7E4N6:JEQ12_016783,A0A835ZK84:JEQ12_013064,A0A835ZXI9:JEQ12_002496,A0A836A333:JEQ12_018353,A0A836ACM1:JEQ12_014212,A0A836AJL8:JEQ12_014184,A0A836D765:JEQ12_010125,W5P080:WNK4,A0A836ABN9:JEQ12_002244
GO:0005198	molecular_function	structural molecule activity	1	142	303	38825	0.671948	0.767941	0.902361	B0LKP1:KRT35
GO:0007155	biological_process	cell adhesion	1	142	309	38825	0.679138	0.771916	0.88484	A0A836ALJ4:JEQ12_015222
GO:0046983	molecular_function	protein dimerization activity	1	142	314	38825	0.685009	0.774358	0.87075	A0A6P7EIU7:JEQ12_002732
GO:0008083	molecular_function	growth factor activity	1	142	327	38825	0.699781	0.786781	0.836133	A0A835ZSK1:JEQ12_013054
GO:0005730	cellular_component	nucleolus	1	142	333	38825	0.706364	0.789913	0.821068	W5PEF0:CENPP
GO:0016567	biological_process	protein ubiquitination	1	142	346	38825	0.720141	0.801013	0.790218	A0A836AH65:JEQ12_001233
GO:0005085	molecular_function	guanyl-nucleotide exchange factor activity	1	142	363	38825	0.737193	0.815618	0.753211	W5PP11:ARFGEF2
GO:0003779	molecular_function	actin binding	1	142	374	38825	0.747672	0.822835	0.731057	A0A836ALJ4:JEQ12_015222
GO:0000981	molecular_function	DNA-binding transcription factor activity, RNA polymerase II-specific	1	142	379	38825	0.752298	0.823568	0.721413	A0A835ZK84:JEQ12_013064
GO:0005615	cellular_component	extracellular space	2	142	806	38825	0.796629	0.867533	0.67845	W5PY63:KLK8,W5PHI7:LOC101116892
GO:0006355	biological_process	regulation of DNA-templated transcription	2	142	815	38825	0.80168	0.868486	0.670958	A0A836APZ2:JEQ12_001276,A0A6P3TDT5:ZNF445
GO:0016887	molecular_function	ATP hydrolysis activity	1	142	448	38825	0.808157	0.870967	0.610302	A0A836ABN9:JEQ12_002244
GO:0005739	cellular_component	mitochondrion	1	142	454	38825	0.812377	0.871002	0.602237	A0A6P3E7I7:JEQ12_014288
GO:0019882	biological_process	antigen processing and presentation	2	142	868	38825	0.829236	0.882474	0.62999	Q4LBE4:ovar-MHCI-E2,R9WDM9:OLA-I
GO:0005634	cellular_component	nucleus	12	142	4106	38825	0.831562	0.882474	0.799071	A0A6P3DZ22:JEQ12_000549,A0A6P3EMM5:HARBI1,A0A835ZK84:JEQ12_013064,A0A835ZMT1:JEQ12_010434,A0A836APZ2:JEQ12_001276,A0A6P3TDT5:ZNF445,A0A835ZL68:JEQ12_012692,A0A835ZYR2:JEQ12_006841,A0A836AKD8:JEQ12_014005,A0A836CVD7:JEQ12_007580,W5P343:AFF1,W5Q7Z8:SUMO1
GO:0016020	cellular_component	membrane	23	142	7449	38825	0.844766	0.891936	0.844215	A0A835ZN47:JEQ12_013186,A0A836A0D7:JEQ12_006460,A0A836A0E6:JEQ12_002163,A0A836A2J5:JEQ12_004386,A0A836A333:JEQ12_018353,A0A836AIL0:JEQ12_015828,A0A836CZD4:JEQ12_003009,W5PZH6:MPDU1,A0A6P3DYJ8:JEQ12_000570,A0A6P3E392:SLC16A7,A0A6P3TQB2:JEQ12_017785,A0A6P7DNV9:JEQ12_009387,A0A6P7E0G1:JEQ12_015154,A0A6P7EQH6:JEQ12_004991,A0A835ZY26:JEQ12_002237,A0A836ABN9:JEQ12_002244,A0A836AES4:JEQ12_016350,A0A836C…
GO:0005840	cellular_component	ribosome	1	142	545	38825	0.866159	0.909905	0.50168	A0A6P3E7I7:JEQ12_014288
GO:0003676	molecular_function	nucleic acid binding	1	142	554	38825	0.870563	0.909935	0.49353	A0A835ZKJ6:JEQ12_011835
GO:0006508	biological_process	proteolysis	2	142	1021	38825	0.890555	0.926178	0.535584	Q9XSM2:,W5PY63:KLK8
GO:0003700	molecular_function	DNA-binding transcription factor activity	1	142	646	38825	0.908091	0.939716	0.423244	A0A835ZMT1:JEQ12_010434
GO:0003723	molecular_function	RNA binding	2	142	1155	38825	0.926869	0.946842	0.473447	A0A836AEL5:JEQ12_010101,A0A836CU99:JEQ12_012041
GO:0006412	biological_process	translation	1	142	708	38825	0.927064	0.946842	0.38618	A0A6P3EAD1:GUF1
GO:0006955	biological_process	immune response	2	142	1163	38825	0.928634	0.946842	0.47019	Q4LBE4:ovar-MHCI-E2,R9WDM9:OLA-I
GO:0005886	cellular_component	plasma membrane	8	142	3417	38825	0.939018	0.95276	0.64013	A0A835ZYY8:JEQ12_007125,A0A836AJL8:JEQ12_014184,A0A836ALJ4:JEQ12_015222,A0A836D765:JEQ12_010125,W5NTH3:ADGRG6,A0A6P3T6A0:RNF34,A0A6P3T904:JEQ12_009549,A0A835ZLH3:JEQ12_011908
GO:0008270	molecular_function	zinc ion binding	2	142	1260	38825	0.947077	0.956272	0.433993	A0A836AH65:JEQ12_001233,A0A835ZKJ6:JEQ12_011835
GO:0003677	molecular_function	DNA binding	3	142	1836	38825	0.966557	0.971227	0.446757	A0A835ZK84:JEQ12_013064,A0A835ZMT1:JEQ12_010434,A0A6P7EIU6:JEQ12_002560
GO:0004930	molecular_function	G protein-coupled receptor activity	1	142	1728	38825	0.998462	0.998462	0.158227	W5NTH3:ADGRG6
