# Supplementary material for: Proteome Analysis of Alpine Merino Sheep Skin Reveals New Insights into the Mechanisms Involved in Regulating Wool Fiber Diameter
Source: Int J Mol Sci. 2023 Oct 16;24(20):15227. doi: 10.3390/ijms242015227 (PMC10607505; doi:10.3390/ijms242015227)
Supplement: Supplementary file 1 [file ijms-24-15227-s001.zip › Supplementary Table S4.xlsx]

## Sheet: EFvsSF
id	Classification_level1	Classification_level2	Term	ListHits	ListTotal	PopHits	PopTotal	p-value	padjust	Enrichment_score	proteins
oas00564	Metabolism	Lipid metabolism	Glycerophospholipid metabolism	6	122	226	22848	0.00136559	0.21086	4.972	A0A836AB62:JEQ12_013417,A0A836AJY5:JEQ12_014394,W5Q983:GPD1,A0A6P7EU40:JEQ12_005744,A0A835ZWC9:JEQ12_004337,A0A836AI10:JEQ12_015008
oas00561	Metabolism	Lipid metabolism	Glycerolipid metabolism	5	122	167	22848	0.00204718	0.21086	5.60715	A0A836AB62:JEQ12_013417,A0A835ZZP8:JEQ12_006387,A0A835ZL45:JEQ12_012647,W5PRB8:LOC101110266,A0A836CRZ6:JEQ12_011406
oas04975	Organismal Systems	Digestive system	Fat digestion and absorption	4	122	122	22848	0.00418634	0.287462	6.14028	A0A836AB62:JEQ12_013417,A0A835ZZP8:JEQ12_006387,A0A835ZL45:JEQ12_012647,W5PRB8:LOC101110266
oas00982	Metabolism	Xenobiotics biodegradation and metabolism	Drug metabolism - cytochrome P450	4	122	141	22848	0.00696111	0.289193	5.31287	W5NZA9:MAOB,A0A835ZUS4:JEQ12_003670,A0A836A2E5:JEQ12_007531,A0A6P3EEW7:JEQ12_010445
oas00500	Metabolism	Carbohydrate metabolism	Starch and sucrose metabolism	3	122	77	22848	0.00815314	0.289193	7.29657	A0A6P3TIW1:UGP2,A0A836A845:JEQ12_015790,W5PEP4:GYG2
oas00480	Metabolism	Metabolism of other amino acids	Glutathione metabolism	4	122	149	22848	0.00842309	0.289193	5.02762	A0A6P7D3C7:JEQ12_007536,A0A8K1EPA0:LAP3,A0A836A2E5:JEQ12_007531,A0A6P3EEW7:JEQ12_010445
oas00430	Metabolism	Metabolism of other amino acids	Taurine and hypotaurine metabolism	2	122	38	22848	0.0175378	0.468367	9.85677	A0A6P7D3C7:JEQ12_007536,A0A835ZUS4:JEQ12_003670
oas04923	Organismal Systems	Endocrine system	Regulation of lipolysis in adipocytes	4	122	194	22848	0.020379	0.468367	3.86142	A0A836A271:JEQ12_005357,A0A836ADC2:JEQ12_017874,A0A6P3CWW8:JEQ12_007718,A0A836CRZ6:JEQ12_011406
oas00380	Metabolism	Amino acid metabolism	Tryptophan metabolism	3	122	112	22848	0.0222172	0.468367	5.01639	W5NZA9:MAOB,A0A836A809:AFMID,A0A836AIQ7:HAAO
oas00260	Metabolism	Amino acid metabolism	Glycine, serine and threonine metabolism	3	122	113	22848	0.0227363	0.468367	4.972	W5NZA9:MAOB,A0A6P7D643:JEQ12_008378,A0A836A4Z2:JEQ12_017779
oas00330	Metabolism	Amino acid metabolism	Arginine and proline metabolism	3	122	134	22848	0.0351538	0.658335	4.19281	W5NZA9:MAOB,A0A8K1EPA0:LAP3,A0A836CSQ6:JEQ12_011739
oas00601	Metabolism	Glycan biosynthesis and metabolism	Glycosphingolipid biosynthesis - lacto and neolacto series	2	122	59	22848	0.0397089	0.68167	6.34843	A0A836D7F4:JEQ12_001387,A0A6P3TUJ5:JEQ12_001312
oas00562	Metabolism	Carbohydrate metabolism	Inositol phosphate metabolism	3	122	161	22848	0.0552732	0.834941	3.48967	A0A836A8S0:JEQ12_003795,A0A835ZY35:JEQ12_007559,A0A836D5R9:JEQ12_009424
oas04130	Genetic Information Processing	Folding, sorting and degradation	SNARE interactions in vesicular transport	2	122	72	22848	0.0567436	0.834941	5.20219	A0A6P7DEC9:JEQ12_012604,A0A6P3E9W7:JEQ12_013864
oas04915	Organismal Systems	Endocrine system	Estrogen signaling pathway	5	122	396	22848	0.0614099	0.843363	2.36463	A0A836ADC2:JEQ12_017874,W5Q702:LOC101108147,W5Q209:KRT39,B0LKP2:,W5Q0V6:KRT28
oas00760	Metabolism	Metabolism of cofactors and vitamins	Nicotinate and nicotinamide metabolism	2	122	80	22848	0.0682703	0.845347	4.68197	A0A835ZXX7:SIRT4,A0A6P3YPE9:JEQ12_003810
oas00052	Metabolism	Carbohydrate metabolism	Galactose metabolism	2	122	81	22848	0.0697616	0.845347	4.62417	A0A6P3TIW1:UGP2,A0A836A845:JEQ12_015790
oas04611	Organismal Systems	Immune system	Platelet activation	4	122	317	22848	0.0902074	0.99891	2.36314	A0A836ADC2:JEQ12_017874,A0A6P3E9W7:JEQ12_013864,A0A835ZWJ1:JEQ12_008612,A0A835ZY74:JEQ12_006723
oas03460	Genetic Information Processing	Replication and repair	Fanconi anemia pathway	2	122	107	22848	0.111855	0.99891	3.50054	A0A6P7EIU6:JEQ12_002560,A0A835ZYG6:JEQ12_007712
oas04061	Environmental Information Processing	Signaling molecules and interaction	Viral protein interaction with cytokine and cytokine receptor	3	122	219	22848	0.11261	0.99891	2.56546	A0A836D611:JEQ12_008880,A0A836D206:JEQ12_003341,A0A6P7EJN4:JEQ12_000926
oas04610	Organismal Systems	Immune system	Complement and coagulation cascades	3	122	226	22848	0.120649	0.99891	2.486	A0A835ZNI9:JEQ12_010477,A0A835ZUP5:JEQ12_005392,A0A836CXE7:JEQ12_004010
oas04650	Organismal Systems	Immune system	Natural killer cell mediated cytotoxicity	5	122	506	22848	0.134661	0.99891	1.85058	A0A836CTN1:JEQ12_010562,I6WH56:,A0A2P9DU16:Class,A0A1Z1GF81:,A0A835ZY74:JEQ12_006723
oas00600	Metabolism	Lipid metabolism	Sphingolipid metabolism	2	122	123	22848	0.140291	0.99891	3.04518	A0A6P3ECM2:JEQ12_016424,A0A6P7E366:CERS4
oas01523	Human Diseases	Drug resistance: antineoplastic	Antifolate resistance	2	122	127	22848	0.147627	0.99891	2.94927	A0A6P3YJY3:JEQ12_003123,A0A836AA67:JEQ12_002243
oas00270	Metabolism	Amino acid metabolism	Cysteine and methionine metabolism	2	122	129	22848	0.151324	0.99891	2.90355	A0A836A4Z2:JEQ12_017779,A0A836A9P7:JEQ12_002018
oas04066	Environmental Information Processing	Signal transduction	HIF-1 signaling pathway	4	122	397	22848	0.16318	0.99891	1.88694	A0A835ZMH1:JEQ12_010944,A0A836D5A1:JEQ12_009302,P52210:ALDOB,A0A6P7EJN4:JEQ12_000926
oas00533	Metabolism	Glycan biosynthesis and metabolism	Glycosaminoglycan biosynthesis - keratan sulfate	1	122	34	22848	0.166537	0.99891	5.5082	A0A836D7F4:JEQ12_001387
oas00980	Metabolism	Xenobiotics biodegradation and metabolism	Metabolism of xenobiotics by cytochrome P450	2	122	155	22848	0.200788	0.99891	2.4165	A0A836A2E5:JEQ12_007531,A0A6P3EEW7:JEQ12_010445
oas00730	Metabolism	Metabolism of cofactors and vitamins	Thiamine metabolism	1	122	42	22848	0.201538	0.99891	4.45902	A0A836D626:JEQ12_010142
oas00450	Metabolism	Metabolism of other amino acids	Selenocompound metabolism	1	122	43	22848	0.20581	0.99891	4.35532	W5Q902:TXNRD2
oas00910	Metabolism	Energy metabolism	Nitrogen metabolism	1	122	44	22848	0.210058	0.99891	4.25633	A0A6P7DQB6:JEQ12_009809
oas04071	Environmental Information Processing	Signal transduction	Sphingolipid signaling pathway	3	122	298	22848	0.21338	0.99891	1.88536	A0A6P3ECM2:JEQ12_016424,A0A6P7E366:CERS4,A0A836AE62:JEQ12_001045
oas04664	Organismal Systems	Immune system	Fc epsilon RI signaling pathway	2	122	163	22848	0.216386	0.99891	2.2979	A0A836AE62:JEQ12_001045,A0A835ZY74:JEQ12_006723
oas05204	Human Diseases	Cancer: overview	Chemical carcinogenesis - DNA adducts	2	122	164	22848	0.218344	0.99891	2.28389	A0A836A2E5:JEQ12_007531,A0A6P3EEW7:JEQ12_010445
oas05163	Human Diseases	Infectious disease: viral	Human cytomegalovirus infection	6	122	765	22848	0.225331	0.99891	1.46885	A0A836ADC2:JEQ12_017874,A0A836CTN1:JEQ12_010562,I6WH56:,A0A2P9DU16:Class,A0A1Z1GF81:,A0A6P7EJN4:JEQ12_000926
oas04144	Cellular Processes	Transport and catabolism	Endocytosis	6	122	769	22848	0.228786	0.99891	1.46121	A0A836CTN1:JEQ12_010562,I6WH56:,A0A2P9DU16:Class,A0A836A1U6:JEQ12_005704,W5NSS0:ARAP3,A0A1Z1GF81:
oas05031	Human Diseases	Substance dependence	Amphetamine addiction	2	122	170	22848	0.230123	0.99891	2.20328	W5NZA9:MAOB,A0A6P7DEC9:JEQ12_012604
oas00340	Metabolism	Amino acid metabolism	Histidine metabolism	1	122	49	22848	0.230966	0.99891	3.82201	W5NZA9:MAOB
oas00360	Metabolism	Amino acid metabolism	Phenylalanine metabolism	1	122	51	22848	0.239174	0.99891	3.67213	W5NZA9:MAOB
oas00230	Metabolism	Nucleotide metabolism	Purine metabolism	3	122	320	22848	0.244302	0.99891	1.75574	A0A836ADC2:JEQ12_017874,A0A836A9P7:JEQ12_002018,A0A836CTY7:JEQ12_008213
oas00563	Metabolism	Glycan biosynthesis and metabolism	Glycosylphosphatidylinositol (GPI)-anchor biosynthesis	1	122	53	22848	0.247296	0.99891	3.53356	A0A835ZTN7:JEQ12_011988
oas00983	Metabolism	Xenobiotics biodegradation and metabolism	Drug metabolism - other enzymes	2	122	181	22848	0.251817	0.99891	2.06938	A0A836A2E5:JEQ12_007531,A0A6P3EEW7:JEQ12_010445
oas04146	Cellular Processes	Transport and catabolism	Peroxisome	2	122	185	22848	0.259724	0.99891	2.02463	A0A836CWL4:JEQ12_004809,A0A6P7DZS1:JEQ12_015109
oas05150	Human Diseases	Infectious disease: bacterial	Staphylococcus aureus infection	9	122	1304	22848	0.261648	0.99891	1.29257	O19031:Bac11,A0A835ZNI9:JEQ12_010477,F8T894:DQB,A8IW66:DRB1,I6VNY9:,W5Q702:LOC101108147,W5Q209:KRT39,B0LKP2:,W5Q0V6:KRT28
oas00010	Metabolism	Carbohydrate metabolism	Glycolysis / Gluconeogenesis	2	122	187	22848	0.263679	0.99891	2.00298	A0A835ZMH1:JEQ12_010944,P52210:ALDOB
oas00220	Metabolism	Amino acid metabolism	Arginine biosynthesis	1	122	60	22848	0.27505	0.99891	3.12131	A0A6P7DQB6:JEQ12_009809
oas03008	Genetic Information Processing	Translation	Ribosome biogenesis in eukaryotes	2	122	194	22848	0.277522	0.99891	1.93071	A0A835ZWT5:JEQ12_007798,A0A6P3EBE2:JEQ12_007663
oas00590	Metabolism	Lipid metabolism	Arachidonic acid metabolism	2	122	202	22848	0.293324	0.99891	1.85424	A0A6P7D3C7:JEQ12_007536,A0A6P3YJY3:JEQ12_003123
oas04614	Organismal Systems	Endocrine system	Renin-angiotensin system	1	122	65	22848	0.294251	0.99891	2.88121	A0A836A1M9:JEQ12_017206
oas01524	Human Diseases	Drug resistance: antineoplastic	Platinum drug resistance	2	122	203	22848	0.295297	0.99891	1.84511	A0A836A2E5:JEQ12_007531,A0A6P3EEW7:JEQ12_010445
oas03020	Genetic Information Processing	Transcription	RNA polymerase	1	122	68	22848	0.305529	0.99891	2.7541	A0A6P3EF08:JEQ12_010572
oas04024	Environmental Information Processing	Signal transduction	cAMP signaling pathway	5	122	688	22848	0.306531	0.99891	1.36104	A0A836A271:JEQ12_005357,A0A836ADC2:JEQ12_017874,W5P3D9:HCAR2,W5NSS0:ARAP3,A0A836AA67:JEQ12_002243
oas00062	Metabolism	Lipid metabolism	Fatty acid elongation	1	122	70	22848	0.312947	0.99891	2.67541	A0A6P3YMV8:ELOVL4
oas04070	Environmental Information Processing	Signal transduction	Phosphatidylinositol signaling system	2	122	212	22848	0.313013	0.99891	1.76678	A0A835ZY35:JEQ12_007559,A0A836D5R9:JEQ12_009424
oas05100	Human Diseases	Infectious disease: bacterial	Bacterial invasion of epithelial cells	2	122	217	22848	0.322817	0.99891	1.72607	W5Q8S1:SEPTIN2,A0A836A1U6:JEQ12_005704
oas04911	Organismal Systems	Endocrine system	Insulin secretion	2	122	218	22848	0.324773	0.99891	1.71815	A0A836ADC2:JEQ12_017874,A0A6P7DEC9:JEQ12_012604
oas03320	Organismal Systems	Endocrine system	PPAR signaling pathway	2	122	221	22848	0.330635	0.99891	1.69483	A0A6P3CWW8:JEQ12_007718,A0A6P3TBK2:JEQ12_010000
oas01040	Metabolism	Lipid metabolism	Biosynthesis of unsaturated fatty acids	1	122	75	22848	0.331152	0.99891	2.49705	A0A6P3YMV8:ELOVL4
oas00630	Metabolism	Carbohydrate metabolism	Glyoxylate and dicarboxylate metabolism	1	122	77	22848	0.3383	0.99891	2.43219	A0A836A809:AFMID
oas04666	Organismal Systems	Immune system	Fc gamma R-mediated phagocytosis	2	122	226	22848	0.340374	0.99891	1.65733	A0A836A1U6:JEQ12_005704,A0A835ZYX0:JEQ12_018695
oas00040	Metabolism	Carbohydrate metabolism	Pentose and glucuronate interconversions	1	122	81	22848	0.352368	0.99891	2.31208	A0A6P3TIW1:UGP2
oas04072	Environmental Information Processing	Signal transduction	Phospholipase D signaling pathway	3	122	398	22848	0.357531	0.99891	1.41165	A0A836AB62:JEQ12_013417,A0A836ADC2:JEQ12_017874,A0A836AE62:JEQ12_001045
oas04371	Environmental Information Processing	Signal transduction	Apelin signaling pathway	3	122	401	22848	0.361901	0.99891	1.40109	A0A836A271:JEQ12_005357,A0A836ADC2:JEQ12_017874,A0A6P3CWW8:JEQ12_007718
oas04512	Environmental Information Processing	Signaling molecules and interaction	ECM-receptor interaction	2	122	238	22848	0.363563	0.99891	1.57377	A0A836A046:JEQ12_017760,A0A835ZWJ1:JEQ12_008612
oas00051	Metabolism	Carbohydrate metabolism	Fructose and mannose metabolism	1	122	85	22848	0.366139	0.99891	2.20328	P52210:ALDOB
oas00030	Metabolism	Carbohydrate metabolism	Pentose phosphate pathway	1	122	87	22848	0.372916	0.99891	2.15263	P52210:ALDOB
oas04218	Cellular Processes	Cell growth and death	Cellular senescence	4	122	586	22848	0.382076	0.99891	1.27835	A0A836CTN1:JEQ12_010562,I6WH56:,A0A2P9DU16:Class,A0A1Z1GF81:
oas00513	Metabolism	Glycan biosynthesis and metabolism	Various types of N-glycan biosynthesis	1	122	90	22848	0.382946	0.99891	2.08087	A0A836D5Y1:JEQ12_015089
oas00790	Metabolism	Metabolism of cofactors and vitamins	Folate biosynthesis	1	122	92	22848	0.389544	0.99891	2.03564	A0A836D626:JEQ12_010142
oas04925	Organismal Systems	Endocrine system	Aldosterone synthesis and secretion	2	122	252	22848	0.390226	0.99891	1.48634	A0A836A271:JEQ12_005357,A0A836ADC2:JEQ12_017874
oas00250	Metabolism	Amino acid metabolism	Alanine, aspartate and glutamate metabolism	1	122	95	22848	0.39931	0.99891	1.97135	A0A6P7DQB6:JEQ12_009809
oas04062	Organismal Systems	Immune system	Chemokine signaling pathway	3	122	436	22848	0.412446	0.99891	1.28861	A0A836ADC2:JEQ12_017874,A0A836D611:JEQ12_008880,A0A836D206:JEQ12_003341
oas04015	Environmental Information Processing	Signal transduction	Rap1 signaling pathway	4	122	614	22848	0.415899	0.99891	1.22006	A0A836D5A1:JEQ12_009302,A0A836ADC2:JEQ12_017874,W5NSS0:ARAP3,A0A835ZY74:JEQ12_006723
oas04152	Environmental Information Processing	Signal transduction	AMPK signaling pathway	3	122	441	22848	0.419579	0.99891	1.274	A0A836A271:JEQ12_005357,A0A3G0YYZ8:Srebp1,A0A835ZV84:JEQ12_011990
oas04750	Organismal Systems	Sensory system	Inflammatory mediator regulation of TRP channels	2	122	271	22848	0.425602	0.99891	1.38213	A0A836ADC2:JEQ12_017874,A0A6P3YJY3:JEQ12_003123
oas00860	Metabolism	Metabolism of cofactors and vitamins	Porphyrin metabolism	1	122	104	22848	0.427689	0.99891	1.80076	A0A835ZWG9:JEQ12_011751
oas01522	Human Diseases	Drug resistance: antineoplastic	Endocrine resistance	2	122	273	22848	0.429266	0.99891	1.37201	A0A836ADC2:JEQ12_017874,A0A835ZX90:JEQ12_008113
oas04970	Organismal Systems	Digestive system	Salivary secretion	2	122	275	22848	0.432917	0.99891	1.36203	A0A836ADC2:JEQ12_017874,O19031:Bac11
oas04976	Organismal Systems	Digestive system	Bile secretion	2	122	276	22848	0.434738	0.99891	1.35709	A0A836ADC2:JEQ12_017874,A0A836AA67:JEQ12_002243
oas03410	Genetic Information Processing	Replication and repair	Base excision repair	1	122	109	22848	0.442876	0.99891	1.71815	W5Q030:POLG2
oas04928	Organismal Systems	Endocrine system	Parathyroid hormone synthesis, secretion and action	2	122	284	22848	0.449194	0.99891	1.31886	A0A836ADC2:JEQ12_017874,W5NSR4:
oas03050	Genetic Information Processing	Folding, sorting and degradation	Proteasome	1	122	113	22848	0.454737	0.99891	1.65733	W5PNT5:PSMD6
oas04726	Organismal Systems	Nervous system	Serotonergic synapse	2	122	289	22848	0.458124	0.99891	1.29605	W5NZA9:MAOB,A0A6P3YJY3:JEQ12_003123
oas04530	Cellular Processes	Cellular community - eukaryotes	Tight junction	3	122	469	22848	0.458961	0.99891	1.19794	A0A836A1U6:JEQ12_005704,A0A835ZQ27:JEQ12_010388,W5QIC7:YBX3
oas04973	Organismal Systems	Digestive system	Carbohydrate digestion and absorption	1	122	117	22848	0.466348	0.99891	1.60067	A0A836A845:JEQ12_015790
oas03013	Genetic Information Processing	Translation	Nucleocytoplasmic transport	2	122	294	22848	0.466972	0.99891	1.274	A0A6P3TGE4:JEQ12_001520,A0A836D4Q4:JEQ12_008687
oas04931	Human Diseases	Endocrine and metabolic disease	Insulin resistance	2	122	295	22848	0.468731	0.99891	1.26969	A0A3G0YYZ8:Srebp1,A0A6P7EIU7:JEQ12_002732
oas04723	Organismal Systems	Nervous system	Retrograde endocannabinoid signaling	3	122	481	22848	0.475503	0.99891	1.16806	A0A836ADC2:JEQ12_017874,W5NWU7:LOC101103602,A0A6P3E7B5:
oas00520	Metabolism	Carbohydrate metabolism	Amino sugar and nucleotide sugar metabolism	1	122	121	22848	0.477713	0.99891	1.54776	A0A6P3TIW1:UGP2
oas04710	Organismal Systems	Environmental adaptation	Circadian rhythm	1	122	122	22848	0.480517	0.99891	1.53507	A0A0F7YC43:RORA
oas05030	Human Diseases	Substance dependence	Cocaine addiction	1	122	122	22848	0.480517	0.99891	1.53507	W5NZA9:MAOB
oas00350	Metabolism	Amino acid metabolism	Tyrosine metabolism	1	122	123	22848	0.483306	0.99891	1.52259	W5NZA9:MAOB
oas04612	Organismal Systems	Immune system	Antigen processing and presentation	8	122	1415	22848	0.486272	0.99891	1.05882	A0A836CTN1:JEQ12_010562,I6WH56:,A0A2P9DU16:Class,A0A836AHX6:JEQ12_016969,A0A1Z1GF81:,F8T894:DQB,A8IW66:DRB1,I6VNY9:
oas00240	Metabolism	Nucleotide metabolism	Pyrimidine metabolism	1	122	125	22848	0.488839	0.99891	1.49823	A0A836CTY7:JEQ12_008213
oas05225	Human Diseases	Cancer: specific types	Hepatocellular carcinoma	3	122	495	22848	0.494509	0.99891	1.13502	W5Q902:TXNRD2,A0A836A2E5:JEQ12_007531,A0A6P3EEW7:JEQ12_010445
oas05203	Human Diseases	Cancer: overview	Viral carcinogenesis	4	122	692	22848	0.50742	0.99891	1.08254	A0A836CTN1:JEQ12_010562,I6WH56:,A0A2P9DU16:Class,A0A1Z1GF81:
oas04330	Environmental Information Processing	Signal transduction	Notch signaling pathway	1	122	142	22848	0.533558	0.99891	1.31886	A0A835ZX90:JEQ12_008113
oas05167	Human Diseases	Infectious disease: viral	Kaposi sarcoma-associated herpesvirus infection	4	122	722	22848	0.540977	0.99891	1.03756	A0A836CTN1:JEQ12_010562,I6WH56:,A0A2P9DU16:Class,A0A1Z1GF81:
oas05207	Human Diseases	Cancer: overview	Chemical carcinogenesis - receptor activation	3	122	548	22848	0.563199	0.99891	1.02525	A0A836ADC2:JEQ12_017874,A0A836A2E5:JEQ12_007531,A0A6P3EEW7:JEQ12_010445
oas05143	Human Diseases	Infectious disease: parasitic	African trypanosomiasis	1	122	156	22848	0.567455	0.99891	1.2005	A0A7S9XD72:HBB
oas05332	Human Diseases	Immune disease	Graft-versus-host disease	7	122	1358	22848	0.592997	0.99891	0.965354	A0A836CTN1:JEQ12_010562,I6WH56:,A0A2P9DU16:Class,A0A1Z1GF81:,F8T894:DQB,A8IW66:DRB1,I6VNY9:
oas04940	Human Diseases	Endocrine and metabolic disease	Type I diabetes mellitus	7	122	1363	22848	0.596933	0.99891	0.961813	A0A836CTN1:JEQ12_010562,I6WH56:,A0A2P9DU16:Class,A0A1Z1GF81:,F8T894:DQB,A8IW66:DRB1,I6VNY9:
oas05330	Human Diseases	Immune disease	Allograft rejection	7	122	1363	22848	0.596933	0.99891	0.961813	A0A836CTN1:JEQ12_010562,I6WH56:,A0A2P9DU16:Class,A0A1Z1GF81:,F8T894:DQB,A8IW66:DRB1,I6VNY9:
oas02010	Environmental Information Processing	Membrane transport	ABC transporters	1	122	170	22848	0.598907	0.99891	1.10164	A0A836AA67:JEQ12_002243
oas04927	Organismal Systems	Endocrine system	Cortisol synthesis and secretion	1	122	170	22848	0.598907	0.99891	1.10164	A0A836ADC2:JEQ12_017874
oas05169	Human Diseases	Infectious disease: viral	Epstein-Barr virus infection	9	122	1757	22848	0.600913	0.99891	0.95931	A0A836CTN1:JEQ12_010562,I6WH56:,A0A2P9DU16:Class,A0A836CTY7:JEQ12_008213,A0A1Z1GF81:,F8T894:DQB,A8IW66:DRB1,I6VNY9:,W5PNT5:PSMD6
oas00830	Metabolism	Metabolism of cofactors and vitamins	Retinol metabolism	1	122	171	22848	0.601065	0.99891	1.0952	W5PB29:CYP2A6
oas05320	Human Diseases	Immune disease	Autoimmune thyroid disease	7	122	1371	22848	0.603191	0.99891	0.9562	A0A836CTN1:JEQ12_010562,I6WH56:,A0A2P9DU16:Class,A0A1Z1GF81:,F8T894:DQB,A8IW66:DRB1,I6VNY9:
oas05017	Human Diseases	Neurodegenerative disease	Spinocerebellar ataxia	2	122	382	22848	0.607702	0.99891	0.980517	A0A0F7YC43:RORA,W5PNT5:PSMD6
oas05170	Human Diseases	Infectious disease: viral	Human immunodeficiency virus 1 infection	4	122	789	22848	0.611524	0.99891	0.949448	A0A836CTN1:JEQ12_010562,I6WH56:,A0A2P9DU16:Class,A0A1Z1GF81:
oas03040	Genetic Information Processing	Transcription	Spliceosome	2	122	386	22848	0.613391	0.99891	0.970356	A0A6P3TJ94:PRPF18,A0A836CSS2:JEQ12_020577
oas04910	Organismal Systems	Endocrine system	Insulin signaling pathway	2	122	391	22848	0.620414	0.99891	0.957947	A0A836A271:JEQ12_005357,A0A3G0YYZ8:Srebp1
oas05416	Human Diseases	Cardiovascular disease	Viral myocarditis	7	122	1398	22848	0.623945	0.99891	0.937733	A0A836CTN1:JEQ12_010562,I6WH56:,A0A2P9DU16:Class,A0A1Z1GF81:,F8T894:DQB,A8IW66:DRB1,I6VNY9:
oas04918	Organismal Systems	Endocrine system	Thyroid hormone synthesis	1	122	182	22848	0.624053	0.99891	1.029	A0A836ADC2:JEQ12_017874
oas04514	Environmental Information Processing	Signaling molecules and interaction	Cell adhesion molecules (CAMs)	8	122	1598	22848	0.626338	0.99891	0.937565	A0A836CTN1:JEQ12_010562,I6WH56:,A0A2P9DU16:Class,A0A1Z1GF81:,F8T894:DQB,A8IW66:DRB1,I6VNY9:,A0A836AP87:JEQ12_000454
oas03018	Genetic Information Processing	Folding, sorting and degradation	RNA degradation	1	122	184	22848	0.62809	0.99891	1.01782	W5PTA9:DCPS
oas04742	Organismal Systems	Sensory system	Taste transduction	1	122	185	22848	0.630092	0.99891	1.01232	A0A836ADC2:JEQ12_017874
oas04721	Organismal Systems	Nervous system	Synaptic vesicle cycle	1	122	187	22848	0.634064	0.99891	1.00149	A0A6P7DEC9:JEQ12_012604
oas04213	Organismal Systems	Aging	Longevity regulating pathway - multiple species	1	122	194	22848	0.647635	0.99891	0.965354	A0A836ADC2:JEQ12_017874
oas04932	Human Diseases	Endocrine and metabolic disease	Non-alcoholic fatty liver disease (NAFLD)	4	122	828	22848	0.649437	0.99891	0.904728	A0A3G0YYZ8:Srebp1,A0A6P3E7B5:,A0A6P7EIU7:JEQ12_002732,A0A6P7EJN4:JEQ12_000926
oas05135	Human Diseases	Infectious disease: bacterial	Yersinia infection	2	122	415	22848	0.652774	0.99891	0.902548	A0A836A1U6:JEQ12_005704,A0A835ZY74:JEQ12_006723
oas04727	Organismal Systems	Nervous system	GABAergic synapse	1	122	209	22848	0.675059	0.99891	0.89607	A0A836ADC2:JEQ12_017874
oas04971	Organismal Systems	Digestive system	Gastric acid secretion	1	122	211	22848	0.678552	0.99891	0.887577	A0A836ADC2:JEQ12_017874
oas05418	Human Diseases	Cardiovascular disease	Fluid shear stress and atherosclerosis	2	122	441	22848	0.685336	0.99891	0.849336	A0A836A2E5:JEQ12_007531,A0A6P3EEW7:JEQ12_010445
oas04540	Cellular Processes	Cellular community - eukaryotes	Gap junction	1	122	221	22848	0.695465	0.99891	0.847415	A0A836ADC2:JEQ12_017874
oas05032	Human Diseases	Substance dependence	Morphine addiction	1	122	222	22848	0.697107	0.99891	0.843598	A0A836ADC2:JEQ12_017874
oas04912	Organismal Systems	Endocrine system	GnRH signaling pathway	1	122	223	22848	0.69874	0.99891	0.839815	A0A836ADC2:JEQ12_017874
oas05231	Human Diseases	Cancer: overview	Choline metabolism in cancer	1	122	223	22848	0.69874	0.99891	0.839815	A0A835ZWC9:JEQ12_004337
oas04936	Human Diseases	Endocrine and metabolic disease	Alcoholic liver disease	2	122	453	22848	0.69951	0.99891	0.826837	A0A3G0YYZ8:Srebp1,A0A835ZNI9:JEQ12_010477
oas05144	Human Diseases	Infectious disease: parasitic	Malaria	1	122	224	22848	0.700365	0.99891	0.836066	A0A7S9XD72:HBB
oas04913	Organismal Systems	Endocrine system	Ovarian steroidogenesis	1	122	225	22848	0.701981	0.99891	0.83235	A0A836ADC2:JEQ12_017874
oas04360	Organismal Systems	Development and regeneration	Axon guidance	2	122	466	22848	0.714269	0.99891	0.803771	A0A836AFA6:JEQ12_016590,A0A836ACQ8:JEQ12_000102
oas05132	Human Diseases	Infectious disease: bacterial	Salmonella infection	3	122	703	22848	0.728839	0.99891	0.799198	A0A835ZMH1:JEQ12_010944,W5PZL5:,A0A836A1U6:JEQ12_005704
oas05133	Human Diseases	Infectious disease: bacterial	Pertussis	1	122	246	22848	0.733985	0.99891	0.761295	A0A835ZNI9:JEQ12_010477
oas04914	Organismal Systems	Endocrine system	Progesterone-mediated oocyte maturation	1	122	250	22848	0.739682	0.99891	0.749115	A0A836ADC2:JEQ12_017874
oas04972	Organismal Systems	Digestive system	Pancreatic secretion	1	122	254	22848	0.745259	0.99891	0.737318	A0A836ADC2:JEQ12_017874
oas05134	Human Diseases	Infectious disease: bacterial	Legionellosis	1	122	256	22848	0.748003	0.99891	0.731557	A0A836D4Q4:JEQ12_008687
oas04714	Organismal Systems	Environmental adaptation	Thermogenesis	5	122	1168	22848	0.753335	0.99891	0.801707	A0A836A271:JEQ12_005357,A0A836ADC2:JEQ12_017874,A0A6P3E7B5:,A0A6P3CWW8:JEQ12_007718,A0A836CRZ6:JEQ12_011406
oas03010	Genetic Information Processing	Translation	Ribosome	3	122	732	22848	0.753728	0.99891	0.767536	A0A836D1P4:JEQ12_018341,A0A6P3EK71:JEQ12_011223,A0A835ZL33:JEQ12_011338
oas05200	Human Diseases	Cancer: overview	Pathways in cancer	7	122	1592	22848	0.754221	0.99891	0.823462	A0A836ADC2:JEQ12_017874,A0A835ZX90:JEQ12_008113,W5Q902:TXNRD2,A0A836A2E5:JEQ12_007531,A0A6P3EEW7:JEQ12_010445,A0A6P7EJN4:JEQ12_000926,A0A6P7EKL1:JEQ12_003851
oas04211	Organismal Systems	Aging	Longevity regulating pathway	1	122	265	22848	0.759991	0.99891	0.706712	A0A836ADC2:JEQ12_017874
oas01521	Human Diseases	Drug resistance: antineoplastic	EGFR tyrosine kinase inhibitor resistance	1	122	266	22848	0.761287	0.99891	0.704055	A0A6P7EJN4:JEQ12_000926
oas05222	Human Diseases	Cancer: specific types	Small cell lung cancer	1	122	270	22848	0.766405	0.99891	0.693625	A0A6P7EKL1:JEQ12_003851
oas05166	Human Diseases	Infectious disease: viral	Human T-cell leukemia virus 1 infection	8	122	1824	22848	0.767159	0.99891	0.821398	A0A836ADC2:JEQ12_017874,A0A836CTN1:JEQ12_010562,I6WH56:,A0A2P9DU16:Class,A0A1Z1GF81:,F8T894:DQB,A8IW66:DRB1,I6VNY9:
oas04725	Organismal Systems	Nervous system	Cholinergic synapse	1	122	271	22848	0.767667	0.99891	0.691065	A0A836ADC2:JEQ12_017874
oas04713	Organismal Systems	Environmental adaptation	Circadian entrainment	1	122	275	22848	0.772648	0.99891	0.681013	A0A836ADC2:JEQ12_017874
oas05414	Human Diseases	Cardiovascular disease	Dilated cardiomyopathy (DCM)	1	122	285	22848	0.784644	0.99891	0.657118	A0A836ADC2:JEQ12_017874
oas05168	Human Diseases	Infectious disease: viral	Herpes simplex virus 1 infection	9	122	2076	22848	0.788897	0.99891	0.811902	A0A836CTN1:JEQ12_010562,I6WH56:,A0A2P9DU16:Class,A0A836AHX6:JEQ12_016969,A0A1Z1GF81:,F8T894:DQB,A8IW66:DRB1,I6VNY9:,A0A836AMH6:JEQ12_008847
oas04145	Cellular Processes	Transport and catabolism	Phagosome	7	122	1657	22848	0.789947	0.99891	0.791159	A0A836CTN1:JEQ12_010562,I6WH56:,A0A2P9DU16:Class,A0A1Z1GF81:,F8T894:DQB,A8IW66:DRB1,I6VNY9:
oas04660	Organismal Systems	Immune system	T cell receptor signaling pathway	1	122	290	22848	0.790404	0.99891	0.645789	A0A835ZY74:JEQ12_006723
oas04724	Organismal Systems	Nervous system	Glutamatergic synapse	1	122	292	22848	0.792665	0.99891	0.641365	A0A836ADC2:JEQ12_017874
oas04064	Environmental Information Processing	Signal transduction	NF-kappa B signaling pathway	1	122	301	22848	0.802544	0.99891	0.622188	A0A836D611:JEQ12_008880
oas04380	Organismal Systems	Development and regeneration	Osteoclast differentiation	1	122	326	22848	0.827602	0.99891	0.574475	A0A835ZY74:JEQ12_006723
oas04728	Organismal Systems	Nervous system	Dopaminergic synapse	1	122	329	22848	0.830389	0.99891	0.569236	W5NZA9:MAOB
oas04142	Cellular Processes	Transport and catabolism	Lysosome	1	122	330	22848	0.831308	0.99891	0.567511	A0A6P7DXT0:JEQ12_014725
oas05165	Human Diseases	Infectious disease: viral	Human papillomavirus infection	4	122	1076	22848	0.831971	0.99891	0.696203	A0A836CTN1:JEQ12_010562,I6WH56:,A0A2P9DU16:Class,A0A1Z1GF81:
oas04640	Organismal Systems	Immune system	Hematopoietic cell lineage	5	122	1318	22848	0.839161	0.99891	0.710465	F8T894:DQB,A8IW66:DRB1,I6VNY9:,A0A6P7EJN4:JEQ12_000926,A0A835ZWJ1:JEQ12_008612
oas04926	Organismal Systems	Endocrine system	Relaxin signaling pathway	1	122	339	22848	0.839359	0.99891	0.552445	A0A836ADC2:JEQ12_017874
oas04270	Organismal Systems	Circulatory system	Vascular smooth muscle contraction	1	122	343	22848	0.842814	0.99891	0.546002	A0A836ADC2:JEQ12_017874
oas04114	Cellular Processes	Cell growth and death	Oocyte meiosis	1	122	344	22848	0.843666	0.99891	0.544415	A0A836ADC2:JEQ12_017874
oas05171	Human Diseases	Infectious disease: viral	Coronavirus disease - COVID-19	4	122	1106	22848	0.847571	0.99891	0.677319	A0A835ZNI9:JEQ12_010477,A0A836D1P4:JEQ12_018341,A0A6P3EK71:JEQ12_011223,A0A6P7EJN4:JEQ12_000926
oas05310	Human Diseases	Immune disease	Asthma	4	122	1114	22848	0.851521	0.99891	0.672455	A0A836AE62:JEQ12_001045,F8T894:DQB,A8IW66:DRB1,I6VNY9:
oas04916	Organismal Systems	Endocrine system	Melanogenesis	1	122	360	22848	0.856693	0.99891	0.520219	A0A836ADC2:JEQ12_017874
oas04659	Organismal Systems	Immune system	Th17 cell differentiation	5	122	1363	22848	0.859625	0.99891	0.687009	A0A0F7YC43:RORA,F8T894:DQB,A8IW66:DRB1,I6VNY9:,A0A6P7EJN4:JEQ12_000926
oas05034	Human Diseases	Substance dependence	Alcoholism	1	122	382	22848	0.872864	0.99891	0.490258	W5NZA9:MAOB
oas04261	Organismal Systems	Circulatory system	Adrenergic signaling in cardiomyocytes	1	122	384	22848	0.874241	0.99891	0.487705	A0A836ADC2:JEQ12_017874
oas04140	Cellular Processes	Transport and catabolism	Autophagy - animal	1	122	385	22848	0.874924	0.99891	0.486438	A0A6P3E9W7:JEQ12_013864
oas04921	Organismal Systems	Endocrine system	Oxytocin signaling pathway	1	122	393	22848	0.880257	0.99891	0.476536	A0A836ADC2:JEQ12_017874
oas04216	Cellular Processes	Cell growth and death	Ferroptosis	1	122	400	22848	0.884738	0.99891	0.468197	A0A836AI10:JEQ12_015008
oas05012	Human Diseases	Neurodegenerative disease	Parkinson disease	4	122	1200	22848	0.888821	0.99891	0.624262	W5NZA9:MAOB,A0A6P3E7B5:,W5PNT5:PSMD6,A0A836A7T4:JEQ12_002392
oas04934	Human Diseases	Endocrine and metabolic disease	Cushing syndrome	1	122	418	22848	0.895512	0.99891	0.448035	A0A836ADC2:JEQ12_017874
oas04110	Cellular Processes	Cell growth and death	Cell cycle	1	122	430	22848	0.902133	0.99891	0.435532	A0A6P7EKL1:JEQ12_003851
oas04310	Environmental Information Processing	Signal transduction	Wnt signaling pathway	1	122	441	22848	0.907836	0.99891	0.424668	A0A6P3TGE4:JEQ12_001520
oas04022	Environmental Information Processing	Signal transduction	cGMP-PKG signaling pathway	1	122	454	22848	0.914152	0.99891	0.412508	A0A836ADC2:JEQ12_017874
oas05321	Human Diseases	Immune disease	Inflammatory bowel disease (IBD)	4	122	1291	22848	0.919203	0.99891	0.580259	A0A0F7YC43:RORA,F8T894:DQB,A8IW66:DRB1,I6VNY9:
oas04621	Organismal Systems	Immune system	NOD-like receptor signaling pathway	1	122	469	22848	0.920908	0.99891	0.399315	O19031:Bac11
oas04935	Organismal Systems	Endocrine system	Growth hormone synthesis, secretion and action	1	122	469	22848	0.920908	0.99891	0.399315	A0A836ADC2:JEQ12_017874
oas04658	Organismal Systems	Immune system	Th1 and Th2 cell differentiation	4	122	1297	22848	0.920921	0.99891	0.577575	A0A835ZX90:JEQ12_008113,F8T894:DQB,A8IW66:DRB1,I6VNY9:
oas05224	Human Diseases	Cancer: specific types	Breast cancer	1	122	475	22848	0.92346	0.99891	0.394271	A0A835ZX90:JEQ12_008113
oas05140	Human Diseases	Infectious disease: parasitic	Leishmaniasis	4	122	1319	22848	0.926946	0.99891	0.567941	F8T894:DQB,A8IW66:DRB1,I6VNY9:,A0A836D4Q4:JEQ12_008687
oas05206	Human Diseases	Cancer: overview	MicroRNAs in cancer	1	122	488	22848	0.928713	0.99891	0.383768	A0A835ZYX0:JEQ12_018695
oas05322	Human Diseases	Immune disease	Systemic lupus erythematosus	4	122	1330	22848	0.929803	0.99891	0.563244	A0A835ZNI9:JEQ12_010477,F8T894:DQB,A8IW66:DRB1,I6VNY9:
oas04613	Organismal Systems	Immune system	Neutrophil extracellular trap formation	1	122	497	22848	0.932139	0.99891	0.376818	O19031:Bac11
oas05152	Human Diseases	Infectious disease: bacterial	Tuberculosis	5	122	1589	22848	0.932465	0.99891	0.589297	O19031:Bac11,A0A836AHX6:JEQ12_016969,F8T894:DQB,A8IW66:DRB1,I6VNY9:
oas05323	Human Diseases	Immune disease	Rheumatoid arthritis	4	122	1345	22848	0.933538	0.99891	0.556963	A0A836D5A1:JEQ12_009302,F8T894:DQB,A8IW66:DRB1,I6VNY9:
oas04010	Environmental Information Processing	Signal transduction	MAPK signaling pathway	2	122	827	22848	0.938329	0.99891	0.452911	A0A836D5A1:JEQ12_009302,A0A836AGH6:JEQ12_016356
oas05202	Human Diseases	Cancer: overview	Transcriptional misregulation in cancer	1	122	519	22848	0.939841	0.99891	0.360845	A0A6P7EKL1:JEQ12_003851
oas05208	Human Diseases	Cancer: overview	Chemical carcinogenesis - reactive oxygen species	3	122	1117	22848	0.941319	0.99891	0.502987	A0A6P3E7B5:,A0A836A2E5:JEQ12_007531,A0A6P3EEW7:JEQ12_010445
oas04060	Environmental Information Processing	Signaling molecules and interaction	Cytokine-cytokine receptor interaction	3	122	1125	22848	0.943186	0.99891	0.49941	A0A836D611:JEQ12_008880,A0A836D206:JEQ12_003341,A0A6P7EJN4:JEQ12_000926
oas04510	Cellular Processes	Cellular community - eukaryotes	Focal adhesion	1	122	560	22848	0.951954	0.99891	0.334426	A0A836ALJ4:JEQ12_015222
oas04672	Organismal Systems	Immune system	Intestinal immune network for IgA production	3	122	1185	22848	0.955539	0.99891	0.474123	F8T894:DQB,A8IW66:DRB1,I6VNY9:
oas04810	Cellular Processes	Cell motility	Regulation of actin cytoskeleton	1	122	600	22848	0.961432	0.99891	0.312131	A0A836A1U6:JEQ12_005704
oas04151	Environmental Information Processing	Signal transduction	PI3K-Akt signaling pathway	3	122	1246	22848	0.965508	0.99891	0.450912	A0A836D5A1:JEQ12_009302,A0A6P7EJN4:JEQ12_000926,A0A835ZPD9:JEQ12_012091
oas05010	Human Diseases	Neurodegenerative disease	Alzheimer disease	4	122	1536	22848	0.967731	0.99891	0.487705	A0A835ZMH1:JEQ12_010944,A0A6P3E7B5:,W5PNT5:PSMD6,A0A836A7T4:JEQ12_002392
oas04014	Environmental Information Processing	Signal transduction	Ras signaling pathway	1	122	646	22848	0.970059	0.99891	0.289905	A0A836D5A1:JEQ12_009302
oas05016	Human Diseases	Neurodegenerative disease	Huntington disease	3	122	1300	22848	0.972552	0.99891	0.432182	A0A6P3E7B5:,A0A6P7DEC9:JEQ12_012604,W5PNT5:PSMD6
oas05205	Human Diseases	Cancer: overview	Proteoglycans in cancer	1	122	668	22848	0.973479	0.99891	0.280357	A0A835ZUP5:JEQ12_005392
oas04020	Environmental Information Processing	Signal transduction	Calcium signaling pathway	1	122	689	22848	0.976381	0.99891	0.271812	A0A836ADC2:JEQ12_017874
oas05145	Human Diseases	Infectious disease: parasitic	Toxoplasmosis	3	122	1385	22848	0.980968	0.99891	0.405658	F8T894:DQB,A8IW66:DRB1,I6VNY9:
oas04630	Environmental Information Processing	Signal transduction	Jak-STAT signaling pathway	1	122	747	22848	0.98286	0.99891	0.250708	A0A6P7EJN4:JEQ12_000926
oas05415	Human Diseases	Cardiovascular disease	Diabetic cardiomyopathy	2	122	1103	22848	0.98302	0.99891	0.339581	A0A835ZMH1:JEQ12_010944,A0A6P3E7B5:
oas05164	Human Diseases	Infectious disease: viral	Influenza A	3	122	1519	22848	0.989474	0.99891	0.369872	F8T894:DQB,A8IW66:DRB1,I6VNY9:
oas05014	Human Diseases	Neurodegenerative disease	Amyotrophic lateral sclerosis (ALS)	3	122	1523	22848	0.989661	0.99891	0.368901	A0A6P3E7B5:,A0A836CSS2:JEQ12_020577,W5PNT5:PSMD6
oas00190	Metabolism	Energy metabolism	Oxidative phosphorylation	1	122	866	22848	0.991145	0.99891	0.216257	A0A6P3E7B5:
oas05020	Human Diseases	Neurodegenerative disease	Prion diseases	2	122	1462	22848	0.997121	0.99891	0.256195	A0A6P3E7B5:,W5PNT5:PSMD6
oas05022	Human Diseases	Neurodegenerative disease	Pathways of neurodegeneration - multiple diseases	3	122	2003	22848	0.99891	0.99891	0.280497	A0A6P3E7B5:,A0A6P7DEC9:JEQ12_012604,W5PNT5:PSMD6

## Sheet: MFvsEF
id	Classification_level1	Classification_level2	Term	ListHits	ListTotal	PopHits	PopTotal	p-value	padjust	Enrichment_score	proteins
oas00513	Metabolism	Glycan biosynthesis and metabolism	Various types of N-glycan biosynthesis	3	83	90	22848	0.00432619	0.804671	9.1759	A0A6P3YMN6:JEQ12_018659,A0A6P7DSV8:JEQ12_013354,A0A836D5Y1:JEQ12_015089
oas01523	Human Diseases	Drug resistance: antineoplastic	Antifolate resistance	3	83	127	22848	0.011155	0.836214	6.50261	A0A6P3YJY3:JEQ12_003123,A0A836AA67:JEQ12_002243,A0A836A0K4:JEQ12_002268
oas03020	Genetic Information Processing	Transcription	RNA polymerase	2	83	68	22848	0.0254406	0.836214	8.09639	A0A6P3EF08:JEQ12_010572,A0A6P3TMF1:POLR3F
oas03265	Genetic Information Processing	Information processing in viruses	Virion - Lyssavirus	1	83	8	22848	0.0286991	0.836214	34.4096	A0A835ZW76:JEQ12_002910
oas05146	Human Diseases	Infectious disease: parasitic	Amoebiasis	4	83	343	22848	0.0363769	0.836214	3.21023	A0A836APW2:JEQ12_001024,W5PCV9:LAMA3,W5PVY4:LAMA2,W5P9U5:LOC101104114
oas00590	Metabolism	Lipid metabolism	Arachidonic acid metabolism	3	83	202	22848	0.037359	0.836214	4.08827	A0A6P7D3C7:JEQ12_007536,A0A6P3YJY3:JEQ12_003123,A0A835ZL52:JEQ12_011521
oas04024	Environmental Information Processing	Signal transduction	cAMP signaling pathway	6	83	688	22848	0.0391402	0.836214	2.40067	W5PET9:CAMK2G,W5P3D9:HCAR2,W5NSS0:ARAP3,A0A836A554:JEQ12_015579,A0A836AA67:JEQ12_002243,A0A836A0K4:JEQ12_002268
oas04512	Environmental Information Processing	Signaling molecules and interaction	ECM-receptor interaction	3	83	238	22848	0.0558881	0.836214	3.46988	W5PCV9:LAMA3,A0A836CTH6:JEQ12_010473,W5PVY4:LAMA2
oas00510	Metabolism	Glycan biosynthesis and metabolism	N-Glycan biosynthesis	2	83	109	22848	0.0597917	0.836214	5.05096	A0A6P3YMN6:JEQ12_018659,A0A6P7DSV8:JEQ12_013354
oas03410	Genetic Information Processing	Replication and repair	Base excision repair	2	83	109	22848	0.0597917	0.836214	5.05096	A0A836D6T4:JEQ12_000264,W5Q030:POLG2
oas04962	Organismal Systems	Excretory system	Vasopressin-regulated water reabsorption	2	83	110	22848	0.0607592	0.836214	5.00504	A0A836A554:JEQ12_015579,W5Q9B2:ARHGDIA
oas04514	Environmental Information Processing	Signaling molecules and interaction	Cell adhesion molecules (CAMs)	10	83	1598	22848	0.06365	0.836214	1.72264	A0A836CTN1:JEQ12_010562,A0A0H5FU01:Ovar-I,A0A2P9DU16:Class,A0A6P3E7M5:JEQ12_001603,A0A835ZRC9:JEQ12_007588,Q95LG2:,A0A1Y5U0U0:DQB1,A0A377TEY1:MHC,F8T894:DQB,W5QBU1:NTNG1
oas04750	Organismal Systems	Sensory system	Inflammatory mediator regulation of TRP channels	3	83	271	22848	0.0760267	0.836214	3.04735	A0A6P3YJY3:JEQ12_003123,W5PET9:CAMK2G,A0A835ZL52:JEQ12_011521
oas04141	Genetic Information Processing	Folding, sorting and degradation	Protein processing in endoplasmic reticulum	4	83	442	22848	0.0773469	0.836214	2.4912	A0A6P3YMN6:JEQ12_018659,A0A6P7DSV8:JEQ12_013354,W5P0B1:ERO1B,A0A836A6H3:JEQ12_002272
oas04360	Organismal Systems	Development and regeneration	Axon guidance	4	83	466	22848	0.0897492	0.836214	2.36289	W5PET9:CAMK2G,A0A836A9Q9:JEQ12_008810,A0A836ACQ8:JEQ12_000102,W5QBU1:NTNG1
oas04530	Cellular Processes	Cellular community - eukaryotes	Tight junction	4	83	469	22848	0.0913637	0.836214	2.34778	A0A836APW2:JEQ12_001024,A0A6P3E7M5:JEQ12_001603,A0A835ZRC9:JEQ12_007588,A0A835ZQ27:JEQ12_010388
oas04722	Organismal Systems	Nervous system	Neurotrophin signaling pathway	3	83	294	22848	0.0917017	0.836214	2.80895	W5PET9:CAMK2G,A0A835ZW76:JEQ12_002910,W5Q9B2:ARHGDIA
oas05165	Human Diseases	Infectious disease: viral	Human papillomavirus infection	7	83	1076	22848	0.0959632	0.836214	1.79084	A0A836CTN1:JEQ12_010562,A0A0H5FU01:Ovar-I,A0A2P9DU16:Class,W5PCV9:LAMA3,A0A836A554:JEQ12_015579,A0A836CTH6:JEQ12_010473,W5PVY4:LAMA2
oas05203	Human Diseases	Cancer: overview	Viral carcinogenesis	5	83	692	22848	0.107206	0.836214	1.989	A0A836CTN1:JEQ12_010562,A0A0H5FU01:Ovar-I,A0A2P9DU16:Class,A0A836A554:JEQ12_015579,A0A6P3EGG0:JEQ12_018524
oas05143	Human Diseases	Infectious disease: parasitic	African trypanosomiasis	2	83	156	22848	0.110325	0.836214	3.52919	A0A835ZT30:JEQ12_006225,Q95LG2:
oas04650	Organismal Systems	Immune system	Natural killer cell mediated cytotoxicity	4	83	506	22848	0.112401	0.836214	2.1761	A0A835ZWK7:JEQ12_007886,A0A836CTN1:JEQ12_010562,A0A0H5FU01:Ovar-I,A0A2P9DU16:Class
oas00310	Metabolism	Amino acid metabolism	Lysine degradation	2	83	162	22848	0.117397	0.836214	3.39848	A0A6P7E0V3:JEQ12_015859,W5Q287:
oas02010	Environmental Information Processing	Membrane transport	ABC transporters	2	83	170	22848	0.127001	0.836214	3.23855	A0A836AA67:JEQ12_002243,A0A836A0K4:JEQ12_002268
oas05031	Human Diseases	Substance dependence	Amphetamine addiction	2	83	170	22848	0.127001	0.836214	3.23855	W5PET9:CAMK2G,A0A836A554:JEQ12_015579
oas00430	Metabolism	Metabolism of other amino acids	Taurine and hypotaurine metabolism	1	83	38	22848	0.129255	0.836214	7.24413	A0A6P7D3C7:JEQ12_007536
oas00604	Metabolism	Glycan biosynthesis and metabolism	Glycosphingolipid biosynthesis - ganglio series	1	83	40	22848	0.135581	0.836214	6.88193	A0A836AIM8:JEQ12_013524
oas00730	Metabolism	Metabolism of cofactors and vitamins	Thiamine metabolism	1	83	42	22848	0.141861	0.836214	6.55422	A0A836D626:JEQ12_010142
oas00010	Metabolism	Carbohydrate metabolism	Glycolysis / Gluconeogenesis	2	83	187	22848	0.147983	0.836214	2.94414	P52210:ALDOB,W5P276:PKLR
oas03008	Genetic Information Processing	Translation	Ribosome biogenesis in eukaryotes	2	83	194	22848	0.15682	0.836214	2.83791	A0A835ZWT5:JEQ12_007798,A0A6P3EBE2:JEQ12_007663
oas05017	Human Diseases	Neurodegenerative disease	Spinocerebellar ataxia	3	83	382	22848	0.162006	0.836214	2.16186	A0A836CY36:JEQ12_002997,A0A0F7YC43:RORA,A0A6P7DH09:JEQ12_013007
oas04911	Organismal Systems	Endocrine system	Insulin secretion	2	83	218	22848	0.187804	0.836214	2.52548	W5PET9:CAMK2G,A0A836A554:JEQ12_015579
oas00511	Metabolism	Glycan biosynthesis and metabolism	Other glycan degradation	1	83	58	22848	0.190505	0.836214	4.74616	A0A835ZW35:JEQ12_010486
oas00601	Metabolism	Glycan biosynthesis and metabolism	Glycosphingolipid biosynthesis - lacto and neolacto series	1	83	59	22848	0.193453	0.836214	4.66571	A0A6P3TUJ5:JEQ12_001312
oas05231	Human Diseases	Cancer: overview	Choline metabolism in cancer	2	83	223	22848	0.194368	0.836214	2.46885	A0A6P3E6W2:JEQ12_001515,A0A835ZWC9:JEQ12_004337
oas05144	Human Diseases	Infectious disease: parasitic	Malaria	2	83	224	22848	0.195685	0.836214	2.45783	A0A835ZT30:JEQ12_006225,Q95LG2:
oas05412	Human Diseases	Cardiovascular disease	Arrhythmogenic right ventricular cardiomyopathy (ARVC)	2	83	224	22848	0.195685	0.836214	2.45783	W5PVY4:LAMA2,W5QDE8:PKP2
oas00564	Metabolism	Lipid metabolism	Glycerophospholipid metabolism	2	83	226	22848	0.198321	0.836214	2.43608	A0A6P3E6W2:JEQ12_001515,A0A835ZWC9:JEQ12_004337
oas04310	Environmental Information Processing	Signal transduction	Wnt signaling pathway	3	83	441	22848	0.215948	0.836214	1.87263	W5QEF2:CHD8,W5PET9:CAMK2G,A0A836CTF0:JEQ12_007985
oas05152	Human Diseases	Infectious disease: bacterial	Tuberculosis	8	83	1589	22848	0.219013	0.836214	1.38591	O19031:Bac11,W5PET9:CAMK2G,A0A836AML4:JEQ12_009581,A0A1Y5U0U0:DQB1,A0A377TEY1:MHC,F8T894:DQB,A0A6P3EDG0:JEQ12_016039,P79360:Map-34
oas05332	Human Diseases	Immune disease	Graft-versus-host disease	7	83	1358	22848	0.222987	0.836214	1.41895	A0A835ZWK7:JEQ12_007886,A0A836CTN1:JEQ12_010562,A0A0H5FU01:Ovar-I,A0A2P9DU16:Class,A0A1Y5U0U0:DQB1,A0A377TEY1:MHC,F8T894:DQB
oas04940	Human Diseases	Endocrine and metabolic disease	Type I diabetes mellitus	7	83	1363	22848	0.225659	0.836214	1.41375	A0A835ZWK7:JEQ12_007886,A0A836CTN1:JEQ12_010562,A0A0H5FU01:Ovar-I,A0A2P9DU16:Class,A0A1Y5U0U0:DQB1,A0A377TEY1:MHC,F8T894:DQB
oas05330	Human Diseases	Immune disease	Allograft rejection	7	83	1363	22848	0.225659	0.836214	1.41375	A0A835ZWK7:JEQ12_007886,A0A836CTN1:JEQ12_010562,A0A0H5FU01:Ovar-I,A0A2P9DU16:Class,A0A1Y5U0U0:DQB1,A0A377TEY1:MHC,F8T894:DQB
oas05320	Human Diseases	Immune disease	Autoimmune thyroid disease	7	83	1371	22848	0.229958	0.836214	1.4055	A0A835ZWK7:JEQ12_007886,A0A836CTN1:JEQ12_010562,A0A0H5FU01:Ovar-I,A0A2P9DU16:Class,A0A1Y5U0U0:DQB1,A0A377TEY1:MHC,F8T894:DQB
oas04925	Organismal Systems	Endocrine system	Aldosterone synthesis and secretion	2	83	252	22848	0.232931	0.836214	2.18474	W5PET9:CAMK2G,A0A836A554:JEQ12_015579
oas03030	Genetic Information Processing	Replication and repair	DNA replication	1	83	76	22848	0.241979	0.836214	3.62207	A0A6P3TRY4:JEQ12_016258
oas04950	Human Diseases	Endocrine and metabolic disease	Maturity onset diabetes of the young	1	83	76	22848	0.241979	0.836214	3.62207	W5P276:PKLR
oas05416	Human Diseases	Cardiovascular disease	Viral myocarditis	7	83	1398	22848	0.244677	0.836214	1.37835	A0A836CTN1:JEQ12_010562,A0A0H5FU01:Ovar-I,A0A2P9DU16:Class,W5PVY4:LAMA2,A0A1Y5U0U0:DQB1,A0A377TEY1:MHC,F8T894:DQB
oas04612	Organismal Systems	Immune system	Antigen processing and presentation	7	83	1415	22848	0.254101	0.836214	1.36179	A0A836CTN1:JEQ12_010562,A0A0H5FU01:Ovar-I,A0A2P9DU16:Class,A0A1Y5U0U0:DQB1,A0A377TEY1:MHC,F8T894:DQB,A0A6P3EDG0:JEQ12_016039
oas05222	Human Diseases	Cancer: specific types	Small cell lung cancer	2	83	270	22848	0.257122	0.836214	2.03909	W5PCV9:LAMA3,W5PVY4:LAMA2
oas04725	Organismal Systems	Nervous system	Cholinergic synapse	2	83	271	22848	0.258468	0.836214	2.03157	W5PET9:CAMK2G,A0A836A554:JEQ12_015579
oas04970	Organismal Systems	Digestive system	Salivary secretion	2	83	275	22848	0.263855	0.836214	2.00202	O19031:Bac11,P79360:Map-34
oas04976	Organismal Systems	Digestive system	Bile secretion	2	83	276	22848	0.265202	0.836214	1.99476	A0A836AA67:JEQ12_002243,A0A836A0K4:JEQ12_002268
oas00051	Metabolism	Carbohydrate metabolism	Fructose and mannose metabolism	1	83	85	22848	0.266489	0.836214	3.23855	P52210:ALDOB
oas04136	Cellular Processes	Transport and catabolism	Autophagy - other	1	83	85	22848	0.266489	0.836214	3.23855	A0A836CY36:JEQ12_002997
oas04613	Organismal Systems	Immune system	Neutrophil extracellular trap formation	3	83	497	22848	0.270144	0.836214	1.66163	O19031:Bac11,A0A6P7DH09:JEQ12_013007,P79360:Map-34
oas00030	Metabolism	Carbohydrate metabolism	Pentose phosphate pathway	1	83	87	22848	0.271829	0.836214	3.1641	P52210:ALDOB
oas04928	Organismal Systems	Endocrine system	Parathyroid hormone synthesis, secretion and action	2	83	284	22848	0.275977	0.836214	1.93857	A0A836A554:JEQ12_015579,A0A6P7E4M9:JEQ12_016067
oas04215	Cellular Processes	Cell growth and death	Apoptosis - multiple species	1	83	91	22848	0.282393	0.836214	3.02502	A0A835ZW76:JEQ12_002910
oas04726	Organismal Systems	Nervous system	Serotonergic synapse	2	83	289	22848	0.28271	0.836214	1.90503	A0A6P3YJY3:JEQ12_003123,A0A835ZL52:JEQ12_011521
oas00790	Metabolism	Metabolism of cofactors and vitamins	Folate biosynthesis	1	83	92	22848	0.28501	0.836214	2.99214	A0A836D626:JEQ12_010142
oas04922	Organismal Systems	Endocrine system	Glucagon signaling pathway	2	83	292	22848	0.286747	0.836214	1.88546	W5PET9:CAMK2G,A0A836A554:JEQ12_015579
oas05340	Human Diseases	Immune disease	Primary immunodeficiency	1	83	94	22848	0.290216	0.836214	2.92848	A0A6P3EDG0:JEQ12_016039
oas05202	Human Diseases	Cancer: overview	Transcriptional misregulation in cancer	3	83	519	22848	0.291894	0.836214	1.5912	A0A835ZWK7:JEQ12_007886,A0A835ZW76:JEQ12_002910,W5Q6R7:NCOR1
oas00591	Metabolism	Lipid metabolism	Linoleic acid metabolism	1	83	95	22848	0.292806	0.836214	2.89765	A0A835ZL52:JEQ12_011521
oas04670	Organismal Systems	Immune system	Leukocyte transendothelial migration	2	83	298	22848	0.294816	0.836214	1.8475	A0A6P3E7M5:JEQ12_001603,A0A835ZRC9:JEQ12_007588
oas05163	Human Diseases	Infectious disease: viral	Human cytomegalovirus infection	4	83	765	22848	0.302427	0.836214	1.43936	A0A836CTN1:JEQ12_010562,A0A0H5FU01:Ovar-I,A0A2P9DU16:Class,A0A836A554:JEQ12_015579
oas04668	Environmental Information Processing	Signal transduction	TNF signaling pathway	2	83	304	22848	0.302873	0.836214	1.81103	A0A836A554:JEQ12_015579,Q95LG2:
oas04144	Cellular Processes	Transport and catabolism	Endocytosis	4	83	769	22848	0.305712	0.836214	1.43187	A0A836CTN1:JEQ12_010562,A0A0H5FU01:Ovar-I,A0A2P9DU16:Class,W5NSS0:ARAP3
oas03022	Genetic Information Processing	Transcription	Basal transcription factors	1	83	103	22848	0.313185	0.844238	2.67259	A0A6P3EGG0:JEQ12_018524
oas00230	Metabolism	Nucleotide metabolism	Purine metabolism	2	83	320	22848	0.324277	0.861652	1.72048	A0A836A9P7:JEQ12_002018,A0A836CTY7:JEQ12_008213
oas04510	Cellular Processes	Cellular community - eukaryotes	Focal adhesion	3	83	560	22848	0.332717	0.868647	1.4747	W5PCV9:LAMA3,A0A836CTH6:JEQ12_010473,W5PVY4:LAMA2
oas04728	Organismal Systems	Nervous system	Dopaminergic synapse	2	83	329	22848	0.336251	0.868647	1.67342	W5PET9:CAMK2G,A0A836A554:JEQ12_015579
oas05166	Human Diseases	Infectious disease: viral	Human T-cell leukemia virus 1 infection	8	83	1824	22848	0.343198	0.873024	1.20736	A0A836CTN1:JEQ12_010562,A0A0H5FU01:Ovar-I,A0A2P9DU16:Class,A0A836A554:JEQ12_015579,A0A1Y5U0U0:DQB1,A0A377TEY1:MHC,F8T894:DQB,A0A6P7E781:JEQ12_017607
oas04218	Cellular Processes	Cell growth and death	Cellular senescence	3	83	586	22848	0.35862	0.873024	1.40927	A0A836CTN1:JEQ12_010562,A0A0H5FU01:Ovar-I,A0A2P9DU16:Class
oas04710	Organismal Systems	Environmental adaptation	Circadian rhythm	1	83	122	22848	0.35929	0.873024	2.25637	A0A0F7YC43:RORA
oas05030	Human Diseases	Substance dependence	Cocaine addiction	1	83	122	22848	0.35929	0.873024	2.25637	A0A836A554:JEQ12_015579
oas00600	Metabolism	Lipid metabolism	Sphingolipid metabolism	1	83	123	22848	0.36163	0.873024	2.23803	A0A835ZW35:JEQ12_010486
oas00240	Metabolism	Nucleotide metabolism	Pyrimidine metabolism	1	83	125	22848	0.366285	0.873024	2.20222	A0A836CTY7:JEQ12_008213
oas00620	Metabolism	Carbohydrate metabolism	Pyruvate metabolism	1	83	128	22848	0.373204	0.873024	2.1506	W5P276:PKLR
oas00270	Metabolism	Amino acid metabolism	Cysteine and methionine metabolism	1	83	129	22848	0.375494	0.873024	2.13393	A0A836A9P7:JEQ12_002018
oas05145	Human Diseases	Infectious disease: parasitic	Toxoplasmosis	6	83	1385	22848	0.389638	0.886443	1.19254	A0A6P7DH09:JEQ12_013007,W5PCV9:LAMA3,W5PVY4:LAMA2,A0A1Y5U0U0:DQB1,A0A377TEY1:MHC,F8T894:DQB
oas04145	Cellular Processes	Transport and catabolism	Phagosome	7	83	1657	22848	0.396839	0.886443	1.16291	A0A836CTN1:JEQ12_010562,A0A0H5FU01:Ovar-I,A0A2P9DU16:Class,A0A836AML4:JEQ12_009581,A0A1Y5U0U0:DQB1,A0A377TEY1:MHC,F8T894:DQB
oas04930	Human Diseases	Endocrine and metabolic disease	Type II diabetes mellitus	1	83	139	22848	0.397942	0.886443	1.98041	W5P276:PKLR
oas04261	Organismal Systems	Circulatory system	Adrenergic signaling in cardiomyocytes	2	83	384	22848	0.407821	0.886443	1.43373	W5PET9:CAMK2G,A0A836A554:JEQ12_015579
oas05417	Human Diseases	Cardiovascular disease	Lipid and atherosclerosis	3	83	638	22848	0.409964	0.886443	1.29441	W5PET9:CAMK2G,Q95LG2:,A0A836A8K7:JEQ12_017735
oas00480	Metabolism	Metabolism of other amino acids	Glutathione metabolism	1	83	149	22848	0.419593	0.886443	1.8475	A0A6P7D3C7:JEQ12_007536
oas04066	Environmental Information Processing	Signal transduction	HIF-1 signaling pathway	2	83	397	22848	0.424227	0.886443	1.38679	P52210:ALDOB,W5PET9:CAMK2G
oas04720	Organismal Systems	Nervous system	Long-term potentiation	1	83	156	22848	0.434289	0.886443	1.7646	W5PET9:CAMK2G
oas04934	Human Diseases	Endocrine and metabolic disease	Cushing syndrome	2	83	418	22848	0.450234	0.886443	1.31712	W5PET9:CAMK2G,A0A836A554:JEQ12_015579
oas05204	Human Diseases	Cancer: overview	Chemical carcinogenesis - DNA adducts	1	83	164	22848	0.450634	0.886443	1.67852	A0A835ZL52:JEQ12_011521
oas00561	Metabolism	Lipid metabolism	Glycerolipid metabolism	1	83	167	22848	0.456643	0.886443	1.64837	A0A6P3E6W2:JEQ12_001515
oas05169	Human Diseases	Infectious disease: viral	Epstein-Barr virus infection	7	83	1757	22848	0.45741	0.886443	1.09672	A0A836CTN1:JEQ12_010562,A0A0H5FU01:Ovar-I,A0A2P9DU16:Class,A0A836CTY7:JEQ12_008213,A0A1Y5U0U0:DQB1,A0A377TEY1:MHC,F8T894:DQB
oas04150	Environmental Information Processing	Signal transduction	mTOR signaling pathway	2	83	425	22848	0.45876	0.886443	1.29542	A0A836CY36:JEQ12_002997,A0A836D4L7:JEQ12_015225
oas04927	Organismal Systems	Endocrine system	Cortisol synthesis and secretion	1	83	170	22848	0.462587	0.886443	1.61928	A0A836A554:JEQ12_015579
oas00830	Metabolism	Metabolism of cofactors and vitamins	Retinol metabolism	1	83	171	22848	0.464554	0.886443	1.60981	A0A835ZL52:JEQ12_011521
oas04623	Organismal Systems	Immune system	Cytosolic DNA-sensing pathway	1	83	171	22848	0.464554	0.886443	1.60981	A0A6P3TMF1:POLR3F
oas04151	Environmental Information Processing	Signal transduction	PI3K-Akt signaling pathway	5	83	1246	22848	0.475842	0.886443	1.10464	W5PCV9:LAMA3,A0A835ZW76:JEQ12_002910,A0A836A554:JEQ12_015579,A0A836CTH6:JEQ12_010473,W5PVY4:LAMA2
oas05160	Human Diseases	Infectious disease: viral	Hepatitis C	2	83	446	22848	0.483879	0.886443	1.23443	A0A6P3E7M5:JEQ12_001603,A0A835ZRC9:JEQ12_007588
oas04918	Organismal Systems	Endocrine system	Thyroid hormone synthesis	1	83	182	22848	0.485726	0.886443	1.51251	A0A836A554:JEQ12_015579
oas05167	Human Diseases	Infectious disease: viral	Kaposi sarcoma-associated herpesvirus infection	3	83	722	22848	0.490051	0.886443	1.14381	A0A836CTN1:JEQ12_010562,A0A0H5FU01:Ovar-I,A0A2P9DU16:Class
oas04022	Environmental Information Processing	Signal transduction	cGMP-PKG signaling pathway	2	83	454	22848	0.493261	0.886443	1.21267	A0A6P7DH09:JEQ12_013007,A0A836A554:JEQ12_015579
oas04721	Organismal Systems	Nervous system	Synaptic vesicle cycle	1	83	187	22848	0.495074	0.886443	1.47207	A0A836A0D7:JEQ12_006460
oas04978	Organismal Systems	Digestive system	Mineral absorption	1	83	189	22848	0.498766	0.886443	1.45649	A0A836A6B1:JEQ12_003509
oas00140	Metabolism	Lipid metabolism	Steroid hormone biosynthesis	1	83	192	22848	0.504254	0.886443	1.43373	A0A835ZL52:JEQ12_011521
oas04621	Organismal Systems	Immune system	NOD-like receptor signaling pathway	2	83	469	22848	0.510568	0.886443	1.17389	O19031:Bac11,P79360:Map-34
oas04217	Cellular Processes	Cell growth and death	Necroptosis	2	83	474	22848	0.516252	0.886443	1.16151	W5PET9:CAMK2G,A0A836A8K7:JEQ12_017735
oas05150	Human Diseases	Infectious disease: bacterial	Staphylococcus aureus infection	5	83	1304	22848	0.516444	0.886443	1.05551	O19031:Bac11,A0A1Y5U0U0:DQB1,A0A377TEY1:MHC,F8T894:DQB,P79360:Map-34
oas05214	Human Diseases	Cancer: specific types	Glioma	1	83	200	22848	0.5186	0.886443	1.37639	W5PET9:CAMK2G
oas05161	Human Diseases	Infectious disease: viral	Hepatitis B	2	83	478	22848	0.520768	0.886443	1.15179	A0A836A554:JEQ12_015579,A0A836A8K7:JEQ12_017735
oas04012	Environmental Information Processing	Signal transduction	ErbB signaling pathway	1	83	205	22848	0.527358	0.886443	1.34282	W5PET9:CAMK2G
oas05206	Human Diseases	Cancer: overview	MicroRNAs in cancer	2	83	488	22848	0.531938	0.886443	1.12818	A0A6P7E0V3:JEQ12_015859,A0A836CTH6:JEQ12_010473
oas04971	Organismal Systems	Digestive system	Gastric acid secretion	1	83	211	22848	0.537659	0.886443	1.30463	W5PET9:CAMK2G
oas04070	Environmental Information Processing	Signal transduction	Phosphatidylinositol signaling system	1	83	212	22848	0.539355	0.886443	1.29848	A0A6P3E6W2:JEQ12_001515
oas05170	Human Diseases	Infectious disease: viral	Human immunodeficiency virus 1 infection	3	83	789	22848	0.550098	0.886443	1.04668	A0A836CTN1:JEQ12_010562,A0A0H5FU01:Ovar-I,A0A2P9DU16:Class
oas04061	Environmental Information Processing	Signaling molecules and interaction	Viral protein interaction with cytokine and cytokine receptor	1	83	219	22848	0.55105	0.886443	1.25697	A0A836D206:JEQ12_003341
oas03320	Organismal Systems	Endocrine system	PPAR signaling pathway	1	83	221	22848	0.554338	0.886443	1.2456	W5PI20:PLIN4
oas04912	Organismal Systems	Endocrine system	GnRH signaling pathway	1	83	223	22848	0.557601	0.886443	1.23443	W5PET9:CAMK2G
oas05133	Human Diseases	Infectious disease: bacterial	Pertussis	1	83	246	22848	0.593477	0.908439	1.11901	A0A836A8K7:JEQ12_017735
oas03015	Genetic Information Processing	Translation	mRNA surveillance pathway	1	83	247	22848	0.59497	0.908439	1.11448	A0A6P7EDF3:JEQ12_018798
oas05134	Human Diseases	Infectious disease: bacterial	Legionellosis	1	83	256	22848	0.608164	0.908439	1.0753	A0A836D4Q4:JEQ12_008687
oas04657	Organismal Systems	Immune system	IL-17 signaling pathway	1	83	261	22848	0.61531	0.908439	1.0547	A0A6P7E4M9:JEQ12_016067
oas04211	Organismal Systems	Aging	Longevity regulating pathway	1	83	265	22848	0.620934	0.908439	1.03878	A0A836A554:JEQ12_015579
oas01522	Human Diseases	Drug resistance: antineoplastic	Endocrine resistance	1	83	273	22848	0.631939	0.908439	1.00834	W5Q6R7:NCOR1
oas04713	Organismal Systems	Environmental adaptation	Circadian entrainment	1	83	275	22848	0.63464	0.908439	1.00101	W5PET9:CAMK2G
oas05235	Human Diseases	Cancer: overview	PD-L1 expression and PD-1 checkpoint pathway in cancer	1	83	275	22848	0.63464	0.908439	1.00101	A0A836A8K7:JEQ12_017735
oas05410	Human Diseases	Cardiovascular disease	Hypertrophic cardiomyopathy (HCM)	1	83	276	22848	0.635984	0.908439	0.997381	W5PVY4:LAMA2
oas05215	Human Diseases	Cancer: specific types	Prostate cancer	1	83	281	22848	0.642628	0.908439	0.979634	A0A836A554:JEQ12_015579
oas05414	Human Diseases	Cardiovascular disease	Dilated cardiomyopathy (DCM)	1	83	285	22848	0.647857	0.908439	0.965885	W5PVY4:LAMA2
oas04724	Organismal Systems	Nervous system	Glutamatergic synapse	1	83	292	22848	0.656826	0.908439	0.94273	A0A836A0D7:JEQ12_006460
oas04015	Environmental Information Processing	Signal transduction	Rap1 signaling pathway	2	83	614	22848	0.657344	0.908439	0.896668	A0A835ZW76:JEQ12_002910,W5NSS0:ARAP3
oas03013	Genetic Information Processing	Translation	Nucleocytoplasmic transport	1	83	294	22848	0.659347	0.908439	0.936317	A0A836D4Q4:JEQ12_008687
oas04931	Human Diseases	Endocrine and metabolic disease	Insulin resistance	1	83	295	22848	0.660601	0.908439	0.933143	A0A836A554:JEQ12_015579
oas04064	Environmental Information Processing	Signal transduction	NF-kappa B signaling pathway	1	83	301	22848	0.668028	0.908439	0.914542	A0A836A8K7:JEQ12_017735
oas04933	Human Diseases	Endocrine and metabolic disease	AGE-RAGE signaling pathway in diabetic complications	1	83	306	22848	0.674094	0.908439	0.899598	Q95LG2:
oas04974	Organismal Systems	Digestive system	Protein digestion and absorption	1	83	315	22848	0.684738	0.908439	0.873896	A0A836D2Z7:JEQ12_019571
oas04350	Environmental Information Processing	Signal transduction	TGF-beta signaling pathway	1	83	324	22848	0.695038	0.908439	0.849621	A0A836AHM3:JEQ12_001533
oas05321	Human Diseases	Immune disease	Inflammatory bowel disease (IBD)	4	83	1291	22848	0.696955	0.908439	0.852911	A0A0F7YC43:RORA,A0A1Y5U0U0:DQB1,A0A377TEY1:MHC,F8T894:DQB
oas04380	Organismal Systems	Development and regeneration	Osteoclast differentiation	1	83	326	22848	0.697282	0.908439	0.844408	A0A6P7E4M9:JEQ12_016067
oas04142	Cellular Processes	Transport and catabolism	Lysosome	1	83	330	22848	0.70172	0.908439	0.834173	A0A835ZW35:JEQ12_010486
oas05016	Human Diseases	Neurodegenerative disease	Huntington disease	4	83	1300	22848	0.702204	0.908439	0.847006	A0A836CY36:JEQ12_002997,A0A6P7DH09:JEQ12_013007,A0A836A0D7:JEQ12_006460,A0A836A554:JEQ12_015579
oas05205	Human Diseases	Cancer: overview	Proteoglycans in cancer	2	83	668	22848	0.702396	0.908439	0.824183	W5PET9:CAMK2G,W5NXI6:ANK1
oas04926	Organismal Systems	Endocrine system	Relaxin signaling pathway	1	83	339	22848	0.711472	0.908439	0.812027	A0A836A554:JEQ12_015579
oas04640	Organismal Systems	Immune system	Hematopoietic cell lineage	4	83	1318	22848	0.71251	0.908439	0.835439	A0A836APW2:JEQ12_001024,A0A1Y5U0U0:DQB1,A0A377TEY1:MHC,F8T894:DQB
oas05140	Human Diseases	Infectious disease: parasitic	Leishmaniasis	4	83	1319	22848	0.713076	0.908439	0.834805	A0A1Y5U0U0:DQB1,A0A377TEY1:MHC,F8T894:DQB,A0A836D4Q4:JEQ12_008687
oas04114	Cellular Processes	Cell growth and death	Oocyte meiosis	1	83	344	22848	0.716753	0.908439	0.800224	W5PET9:CAMK2G
oas04919	Organismal Systems	Endocrine system	Thyroid hormone signaling pathway	1	83	345	22848	0.717797	0.908439	0.797905	W5Q6R7:NCOR1
oas04020	Environmental Information Processing	Signal transduction	Calcium signaling pathway	2	83	689	22848	0.718562	0.908439	0.799063	A0A6P7DH09:JEQ12_013007,W5PET9:CAMK2G
oas04916	Organismal Systems	Endocrine system	Melanogenesis	1	83	360	22848	0.733018	0.908439	0.764659	W5PET9:CAMK2G
oas04659	Organismal Systems	Immune system	Th17 cell differentiation	4	83	1363	22848	0.737157	0.908439	0.807857	A0A0F7YC43:RORA,A0A1Y5U0U0:DQB1,A0A377TEY1:MHC,F8T894:DQB
oas04620	Organismal Systems	Immune system	Toll-like receptor signaling pathway	1	83	367	22848	0.739841	0.908439	0.750074	A0A836A8K7:JEQ12_017735
oas04210	Cellular Processes	Cell growth and death	Apoptosis	1	83	382	22848	0.753887	0.908439	0.720621	A0A835ZWK7:JEQ12_007886
oas05034	Human Diseases	Substance dependence	Alcoholism	1	83	382	22848	0.753887	0.908439	0.720621	A0A836A554:JEQ12_015579
oas04140	Cellular Processes	Transport and catabolism	Autophagy - animal	1	83	385	22848	0.756604	0.908439	0.715005	A0A836CY36:JEQ12_002997
oas04910	Organismal Systems	Endocrine system	Insulin signaling pathway	1	83	391	22848	0.761951	0.908439	0.704034	W5P276:PKLR
oas04921	Organismal Systems	Endocrine system	Oxytocin signaling pathway	1	83	393	22848	0.763708	0.908439	0.700451	W5PET9:CAMK2G
oas04915	Organismal Systems	Endocrine system	Estrogen signaling pathway	1	83	396	22848	0.766318	0.908439	0.695144	A0A836A554:JEQ12_015579
oas04072	Environmental Information Processing	Signal transduction	Phospholipase D signaling pathway	1	83	398	22848	0.768043	0.908439	0.691651	A0A6P3E6W2:JEQ12_001515
oas05310	Human Diseases	Immune disease	Asthma	3	83	1114	22848	0.776492	0.908439	0.741321	A0A1Y5U0U0:DQB1,A0A377TEY1:MHC,F8T894:DQB
oas05168	Human Diseases	Infectious disease: viral	Herpes simplex virus 1 infection	6	83	2076	22848	0.776569	0.908439	0.795599	A0A836CTN1:JEQ12_010562,A0A0H5FU01:Ovar-I,A0A2P9DU16:Class,A0A1Y5U0U0:DQB1,A0A377TEY1:MHC,F8T894:DQB
oas04062	Organismal Systems	Immune system	Chemokine signaling pathway	1	83	436	22848	0.798521	0.920223	0.63137	A0A836D206:JEQ12_003341
oas04152	Environmental Information Processing	Signal transduction	AMPK signaling pathway	1	83	441	22848	0.802225	0.920223	0.624211	A0A836A554:JEQ12_015579
oas05418	Human Diseases	Cardiovascular disease	Fluid shear stress and atherosclerosis	1	83	441	22848	0.802225	0.920223	0.624211	Q95LG2:
oas04010	Environmental Information Processing	Signal transduction	MAPK signaling pathway	2	83	827	22848	0.807489	0.920223	0.665725	A0A835ZW76:JEQ12_002910,A0A6P7E4M9:JEQ12_016067
oas04672	Organismal Systems	Immune system	Intestinal immune network for IgA production	3	83	1185	22848	0.81138	0.920223	0.696904	A0A1Y5U0U0:DQB1,A0A377TEY1:MHC,F8T894:DQB
oas05012	Human Diseases	Neurodegenerative disease	Parkinson disease	3	83	1200	22848	0.818144	0.920346	0.688193	A0A6P7DH09:JEQ12_013007,W5PET9:CAMK2G,A0A836A7T4:JEQ12_002392
oas04935	Organismal Systems	Endocrine system	Growth hormone synthesis, secretion and action	1	83	469	22848	0.821755	0.920346	0.586945	A0A836A554:JEQ12_015579
oas05162	Human Diseases	Infectious disease: viral	Measles	1	83	476	22848	0.826332	0.920346	0.578313	C5IJ93:RAB9A
oas04658	Organismal Systems	Immune system	Th1 and Th2 cell differentiation	3	83	1297	22848	0.857151	0.948988	0.636724	A0A1Y5U0U0:DQB1,A0A377TEY1:MHC,F8T894:DQB
oas05207	Human Diseases	Cancer: overview	Chemical carcinogenesis - receptor activation	1	83	548	22848	0.867166	0.950279	0.50233	A0A836A554:JEQ12_015579
oas05322	Human Diseases	Immune disease	Systemic lupus erythematosus	3	83	1330	22848	0.868676	0.950279	0.620926	A0A1Y5U0U0:DQB1,A0A377TEY1:MHC,F8T894:DQB
oas05323	Human Diseases	Immune disease	Rheumatoid arthritis	3	83	1345	22848	0.873643	0.950279	0.614001	A0A1Y5U0U0:DQB1,A0A377TEY1:MHC,F8T894:DQB
oas04810	Cellular Processes	Cell motility	Regulation of actin cytoskeleton	1	83	600	22848	0.890604	0.961823	0.458795	W5QA03:ABI2
oas04014	Environmental Information Processing	Signal transduction	Ras signaling pathway	1	83	646	22848	0.9079	0.961823	0.426126	A0A835ZW76:JEQ12_002910
oas05415	Human Diseases	Cardiovascular disease	Diabetic cardiomyopathy	2	83	1103	22848	0.914628	0.961823	0.499143	A0A6P7DH09:JEQ12_013007,W5PET9:CAMK2G
oas05208	Human Diseases	Cancer: overview	Chemical carcinogenesis - reactive oxygen species	2	83	1117	22848	0.918206	0.961823	0.492886	A0A836A6B1:JEQ12_003509,A0A6P7DH09:JEQ12_013007
oas04060	Environmental Information Processing	Signaling molecules and interaction	Cytokine-cytokine receptor interaction	2	83	1125	22848	0.920188	0.961823	0.489382	A0A835ZW76:JEQ12_002910,A0A836D206:JEQ12_003341
oas05164	Human Diseases	Infectious disease: viral	Influenza A	3	83	1519	22848	0.92031	0.961823	0.543668	A0A1Y5U0U0:DQB1,A0A377TEY1:MHC,F8T894:DQB
oas05010	Human Diseases	Neurodegenerative disease	Alzheimer disease	3	83	1536	22848	0.923916	0.961823	0.537651	A0A836CY36:JEQ12_002997,A0A6P7DH09:JEQ12_013007,A0A836A7T4:JEQ12_002392
oas05132	Human Diseases	Infectious disease: bacterial	Salmonella infection	1	83	703	22848	0.925626	0.961823	0.391575	C5IJ93:RAB9A
oas05200	Human Diseases	Cancer: overview	Pathways in cancer	3	83	1592	22848	0.93478	0.96594	0.518738	W5PET9:CAMK2G,W5PCV9:LAMA3,W5PVY4:LAMA2
oas04932	Human Diseases	Endocrine and metabolic disease	Non-alcoholic fatty liver disease (NAFLD)	1	83	828	22848	0.953549	0.97989	0.33246	W5P276:PKLR
oas05020	Human Diseases	Neurodegenerative disease	Prion diseases	2	83	1462	22848	0.972601	0.990899	0.376576	A0A6P7DH09:JEQ12_013007,A0A836A554:JEQ12_015579
oas05014	Human Diseases	Neurodegenerative disease	Amyotrophic lateral sclerosis (ALS)	2	83	1523	22848	0.977572	0.990899	0.361493	A0A836CY36:JEQ12_002997,A0A836A0D7:JEQ12_006460
oas05022	Human Diseases	Neurodegenerative disease	Pathways of neurodegeneration - multiple diseases	3	83	2003	22848	0.980245	0.990899	0.412297	A0A836CY36:JEQ12_002997,A0A6P7DH09:JEQ12_013007,W5PET9:CAMK2G
oas04714	Organismal Systems	Environmental adaptation	Thermogenesis	1	83	1168	22848	0.987264	0.992601	0.235682	A0A836A554:JEQ12_015579
oas04740	Organismal Systems	Sensory system	Olfactory transduction	1	83	1498	22848	0.996443	0.996443	0.183763	W5PET9:CAMK2G

## Sheet: MvsMF
id	Classification_level1	Classification_level2	Term	ListHits	ListTotal	PopHits	PopTotal	p-value	padjust	Enrichment_score	proteins
oas03320	Organismal Systems	Endocrine system	PPAR signaling pathway	3	61	221	22848	0.0213018	0.920469	5.08449	A0A6P3EK75:JEQ12_005950,A0A836A5W6:JEQ12_016393,W5P7U3:SORBS1
oas00232	Metabolism	Biosynthesis of other secondary metabolites	Caffeine metabolism	1	61	11	22848	0.0289853	0.920469	34.0507	A0A6P7DI25:LOC101120889
oas04979	Organismal Systems	Digestive system	Cholesterol metabolism	2	61	123	22848	0.0428059	0.920469	6.09036	A0A6P3EK75:JEQ12_005950,A0A836A5W6:JEQ12_016393
oas03013	Genetic Information Processing	Translation	Nucleocytoplasmic transport	3	61	294	22848	0.0439434	0.920469	3.82201	A0A836CYL9:JEQ12_002056,A0A836D8Q5:JEQ12_001386,W5Q7Z8:SUMO1
oas04974	Organismal Systems	Digestive system	Protein digestion and absorption	3	61	315	22848	0.0520283	0.920469	3.56721	A0A836D5E3:JEQ12_009437,W5P6V2:COL17A1,A0A836AHQ9:JEQ12_013386
oas05142	Human Diseases	Infectious disease: parasitic	Chagas disease (American trypanosomiasis)	3	61	386	22848	0.084181	0.920469	2.91107	W5Q0B5:PPP2R1A,A0A836D7I1:JEQ12_010126,A0A836D9E9:JEQ12_010128
oas00983	Metabolism	Xenobiotics biodegradation and metabolism	Drug metabolism - other enzymes	2	61	181	22848	0.084338	0.920469	4.13876	A0A835ZXI9:JEQ12_002496,A0A6P7DI25:LOC101120889
oas00900	Metabolism	Metabolism of terpenoids and polyketides	Terpenoid backbone biosynthesis	1	61	47	22848	0.118188	0.920469	7.96931	W5PZH4:LOC101108851
oas04936	Human Diseases	Endocrine and metabolic disease	Alcoholic liver disease	3	61	453	22848	0.120582	0.920469	2.48051	A0A835ZR38:JEQ12_011959,A0A836D7I1:JEQ12_010126,A0A836D9E9:JEQ12_010128
oas04610	Organismal Systems	Immune system	Complement and coagulation cascades	2	61	226	22848	0.122179	0.920469	3.31467	A0A836D7I1:JEQ12_010126,A0A836D9E9:JEQ12_010128
oas00340	Metabolism	Amino acid metabolism	Histidine metabolism	1	61	49	22848	0.1229	0.920469	7.64403	A0A6P3E3E9:JEQ12_014689
oas00515	Metabolism	Glycan biosynthesis and metabolism	Mannose type O-glycan biosynthesis	1	61	51	22848	0.127587	0.920469	7.34426	A0A6P7DHP6:JEQ12_013291
oas05133	Human Diseases	Infectious disease: bacterial	Pertussis	2	61	246	22848	0.140126	0.920469	3.04518	A0A836D7I1:JEQ12_010126,A0A836D9E9:JEQ12_010128
oas00511	Metabolism	Glycan biosynthesis and metabolism	Other glycan degradation	1	61	58	22848	0.143799	0.920469	6.45789	A0A835ZW35:JEQ12_010486
oas04520	Cellular Processes	Cellular community - eukaryotes	Adherens junction	2	61	269	22848	0.161419	0.920469	2.78481	Q28539:,W5P7U3:SORBS1
oas04750	Organismal Systems	Sensory system	Inflammatory mediator regulation of TRP channels	2	61	271	22848	0.163298	0.920469	2.76426	A0A836A333:JEQ12_018353,A0A836CZD4:JEQ12_003009
oas04670	Organismal Systems	Immune system	Leukocyte transendothelial migration	2	61	298	22848	0.189034	0.920469	2.51381	Q28539:,A0A835ZV86:JEQ12_003518
oas04218	Cellular Processes	Cell growth and death	Cellular senescence	3	61	586	22848	0.205877	0.920469	1.91753	Q4LBE4:ovar-MHCI-E2,R9WDM9:OLA-I,A0A835ZV86:JEQ12_003518
oas04611	Organismal Systems	Immune system	Platelet activation	2	61	317	22848	0.20747	0.920469	2.36314	Q28539:,A0A836D5E3:JEQ12_009437
oas00790	Metabolism	Metabolism of cofactors and vitamins	Folate biosynthesis	1	61	92	22848	0.218424	0.920469	4.07128	W5PMM4:LOC106990122
oas04728	Organismal Systems	Nervous system	Dopaminergic synapse	2	61	329	22848	0.219216	0.920469	2.27694	A0A6P3EIS0:JEQ12_002837,W5Q0B5:PPP2R1A
oas05340	Human Diseases	Immune disease	Primary immunodeficiency	1	61	94	22848	0.222609	0.920469	3.98465	A0A6P3EDG0:JEQ12_016039
oas04114	Cellular Processes	Cell growth and death	Oocyte meiosis	2	61	344	22848	0.23398	0.920469	2.17766	A0A836ACM1:JEQ12_014212,W5Q0B5:PPP2R1A
oas03022	Genetic Information Processing	Transcription	Basal transcription factors	1	61	103	22848	0.241169	0.920469	3.63648	A0A6P7D8F4:JEQ12_010355
oas00860	Metabolism	Metabolism of cofactors and vitamins	Porphyrin metabolism	1	61	104	22848	0.243204	0.920469	3.60151	A0A6P3E0G2:JEQ12_001713
oas03460	Genetic Information Processing	Replication and repair	Fanconi anemia pathway	1	61	107	22848	0.249277	0.920469	3.50054	A0A6P7EIU6:JEQ12_002560
oas03420	Genetic Information Processing	Replication and repair	Nucleotide excision repair	1	61	120	22848	0.275045	0.920469	3.12131	A0A835ZK84:JEQ12_013064
oas05030	Human Diseases	Substance dependence	Cocaine addiction	1	61	122	22848	0.278932	0.920469	3.07014	A0A6P3EIS0:JEQ12_002837
oas00600	Metabolism	Lipid metabolism	Sphingolipid metabolism	1	61	123	22848	0.280867	0.920469	3.04518	A0A835ZW35:JEQ12_010486
oas00240	Metabolism	Nucleotide metabolism	Pyrimidine metabolism	1	61	125	22848	0.284723	0.920469	2.99646	A0A835ZXI9:JEQ12_002496
oas01523	Human Diseases	Drug resistance: antineoplastic	Antifolate resistance	1	61	127	22848	0.288558	0.920469	2.94927	A0A836ABN9:JEQ12_002244
oas04110	Cellular Processes	Cell growth and death	Cell cycle	2	61	430	22848	0.319079	0.920469	1.74213	A0A836ACM1:JEQ12_014212,W5Q0B5:PPP2R1A
oas00480	Metabolism	Metabolism of other amino acids	Glutathione metabolism	1	61	149	22848	0.329433	0.920469	2.51381	A0A6P7E783:JEQ12_000335
oas04340	Environmental Information Processing	Signal transduction	Hedgehog signaling pathway	1	61	149	22848	0.329433	0.920469	2.51381	A0A6P7E4N6:JEQ12_016783
oas05418	Human Diseases	Cardiovascular disease	Fluid shear stress and atherosclerosis	2	61	441	22848	0.329883	0.920469	1.69867	Q28539:,W5Q7Z8:SUMO1
oas04141	Genetic Information Processing	Folding, sorting and degradation	Protein processing in endoplasmic reticulum	2	61	442	22848	0.330863	0.920469	1.69483	A0A836A6H3:JEQ12_002272,A0A6P7EQH6:JEQ12_004991
oas04144	Cellular Processes	Transport and catabolism	Endocytosis	3	61	769	22848	0.337919	0.920469	1.46121	Q4LBE4:ovar-MHCI-E2,R9WDM9:OLA-I,W5PP11:ARFGEF2
oas00310	Metabolism	Amino acid metabolism	Lysine degradation	1	61	162	22848	0.352492	0.920469	2.31208	A0A836AKD8:JEQ12_014005
oas04360	Organismal Systems	Development and regeneration	Axon guidance	2	61	466	22848	0.354267	0.920469	1.60754	A0A836D765:JEQ12_010125,W5QBU1:NTNG1
oas05204	Human Diseases	Cancer: overview	Chemical carcinogenesis - DNA adducts	1	61	164	22848	0.35597	0.920469	2.28389	A0A6P7DI25:LOC101120889
oas04530	Cellular Processes	Cellular community - eukaryotes	Tight junction	2	61	469	22848	0.357174	0.920469	1.59726	Q28539:,W5Q0B5:PPP2R1A
oas00561	Metabolism	Lipid metabolism	Glycerolipid metabolism	1	61	167	22848	0.361151	0.920469	2.24286	A0A835ZR38:JEQ12_011959
oas02010	Environmental Information Processing	Membrane transport	ABC transporters	1	61	170	22848	0.366292	0.920469	2.20328	A0A836ABN9:JEQ12_002244
oas05031	Human Diseases	Substance dependence	Amphetamine addiction	1	61	170	22848	0.366292	0.920469	2.20328	A0A6P3EIS0:JEQ12_002837
oas04730	Organismal Systems	Nervous system	Long-term depression	1	61	173	22848	0.371392	0.920469	2.16507	W5Q0B5:PPP2R1A
oas04662	Organismal Systems	Immune system	B cell receptor signaling pathway	1	61	176	22848	0.376452	0.920469	2.12817	A0A6P3EEU1:JEQ12_010401
oas04613	Organismal Systems	Immune system	Neutrophil extracellular trap formation	2	61	497	22848	0.384083	0.920469	1.50727	Q28539:,A0A6P7DH09:JEQ12_013007
oas05014	Human Diseases	Neurodegenerative disease	Amyotrophic lateral sclerosis (ALS)	5	61	1523	22848	0.384458	0.920469	1.22967	Q28539:,W5P2D4:NEFH,A0A836A0D7:JEQ12_006460,A0A8V6WJ47:NDUFS5,A0A6P7E783:JEQ12_000335
oas04390	Environmental Information Processing	Signal transduction	Hippo signaling pathway	2	61	499	22848	0.385988	0.920469	1.50123	Q28539:,W5Q0B5:PPP2R1A
oas04918	Organismal Systems	Endocrine system	Thyroid hormone synthesis	1	61	182	22848	0.386452	0.920469	2.05801	A0A6P7E783:JEQ12_000335
oas04650	Organismal Systems	Immune system	Natural killer cell mediated cytotoxicity	2	61	506	22848	0.392636	0.920469	1.48046	Q4LBE4:ovar-MHCI-E2,R9WDM9:OLA-I
oas04721	Organismal Systems	Nervous system	Synaptic vesicle cycle	1	61	187	22848	0.394664	0.920469	2.00298	A0A836A0D7:JEQ12_006460
oas05223	Human Diseases	Cancer: specific types	Non-small cell lung cancer	1	61	188	22848	0.396294	0.920469	1.99233	A0A835ZV86:JEQ12_003518
oas00140	Metabolism	Lipid metabolism	Steroid hormone biosynthesis	1	61	192	22848	0.402769	0.920469	1.95082	W5PMM4:LOC106990122
oas03250	Genetic Information Processing	Information processing in viruses	Viral life cycle - HIV-1	1	61	200	22848	0.415514	0.920469	1.87279	A0A6P3TQB2:JEQ12_017785
oas00590	Metabolism	Lipid metabolism	Arachidonic acid metabolism	1	61	202	22848	0.418659	0.920469	1.85424	W5PMM4:LOC106990122
oas04971	Organismal Systems	Digestive system	Gastric acid secretion	1	61	211	22848	0.432603	0.920469	1.77515	Q28539:
oas04137	Cellular Processes	Transport and catabolism	Mitophagy - animal	1	61	215	22848	0.438695	0.920469	1.74213	A0A6P3ENR6:JEQ12_007398
oas05100	Human Diseases	Infectious disease: bacterial	Bacterial invasion of epithelial cells	1	61	217	22848	0.441717	0.920469	1.72607	Q28539:
oas04510	Cellular Processes	Cellular community - eukaryotes	Focal adhesion	2	61	560	22848	0.442804	0.920469	1.3377	Q28539:,A0A836ALJ4:JEQ12_015222
oas04115	Cellular Processes	Cell growth and death	p53 signaling pathway	1	61	222	22848	0.449201	0.920469	1.6872	A0A835ZZX2:JEQ12_003374
oas05412	Human Diseases	Cardiovascular disease	Arrhythmogenic right ventricular cardiomyopathy (ARVC)	1	61	224	22848	0.452167	0.920469	1.67213	Q28539:
oas04913	Organismal Systems	Endocrine system	Ovarian steroidogenesis	1	61	225	22848	0.453644	0.920469	1.6647	W5PMM4:LOC106990122
oas00564	Metabolism	Lipid metabolism	Glycerophospholipid metabolism	1	61	226	22848	0.455117	0.920469	1.65733	A0A835ZR38:JEQ12_011959
oas05016	Human Diseases	Neurodegenerative disease	Huntington disease	4	61	1300	22848	0.460143	0.920469	1.15248	A0A6P7DH09:JEQ12_013007,A0A836A0D7:JEQ12_006460,A0A8V6WJ47:NDUFS5,A0A6P7E783:JEQ12_000335
oas03015	Genetic Information Processing	Translation	mRNA surveillance pathway	1	61	247	22848	0.485167	0.920469	1.51643	W5Q0B5:PPP2R1A
oas04914	Organismal Systems	Endocrine system	Progesterone-mediated oocyte maturation	1	61	250	22848	0.489324	0.920469	1.49823	A0A836ACM1:JEQ12_014212
oas04015	Environmental Information Processing	Signal transduction	Rap1 signaling pathway	2	61	614	22848	0.490695	0.920469	1.22006	Q28539:,A0A835ZV86:JEQ12_003518
oas04920	Organismal Systems	Endocrine system	Adipocytokine signaling pathway	1	61	254	22848	0.494816	0.920469	1.47464	A0A6P3EEU1:JEQ12_010401
oas05134	Human Diseases	Infectious disease: bacterial	Legionellosis	1	61	256	22848	0.497541	0.920469	1.46311	A0A836D8Q5:JEQ12_001386
oas05235	Human Diseases	Cancer: overview	PD-L1 expression and PD-1 checkpoint pathway in cancer	1	61	275	22848	0.52271	0.920469	1.36203	A0A6P3EEU1:JEQ12_010401
oas04976	Organismal Systems	Digestive system	Bile secretion	1	61	276	22848	0.524	0.920469	1.35709	A0A836ABN9:JEQ12_002244
oas05410	Human Diseases	Cardiovascular disease	Hypertrophic cardiomyopathy (HCM)	1	61	276	22848	0.524	0.920469	1.35709	Q28539:
oas05414	Human Diseases	Cardiovascular disease	Dilated cardiomyopathy (DCM)	1	61	285	22848	0.535455	0.920469	1.31424	Q28539:
oas04660	Organismal Systems	Immune system	T cell receptor signaling pathway	1	61	290	22848	0.541701	0.920469	1.29158	A0A6P3EEU1:JEQ12_010401
oas04724	Organismal Systems	Nervous system	Glutamatergic synapse	1	61	292	22848	0.544177	0.920469	1.28273	A0A836A0D7:JEQ12_006460
oas04722	Organismal Systems	Nervous system	Neurotrophin signaling pathway	1	61	294	22848	0.546639	0.920469	1.274	A0A6P3EEU1:JEQ12_010401
oas04931	Human Diseases	Endocrine and metabolic disease	Insulin resistance	1	61	295	22848	0.547865	0.920469	1.26969	A0A6P7EIU7:JEQ12_002732
oas04071	Environmental Information Processing	Signal transduction	Sphingolipid signaling pathway	1	61	298	22848	0.551524	0.920469	1.2569	W5Q0B5:PPP2R1A
oas04024	Environmental Information Processing	Signal transduction	cAMP signaling pathway	2	61	688	22848	0.552098	0.920469	1.08883	A0A836ABN9:JEQ12_002244,A0A6P3EIS0:JEQ12_002837
oas05165	Human Diseases	Infectious disease: viral	Human papillomavirus infection	3	61	1076	22848	0.552881	0.920469	1.0443	Q4LBE4:ovar-MHCI-E2,R9WDM9:OLA-I,W5Q0B5:PPP2R1A
oas05020	Human Diseases	Neurodegenerative disease	Prion diseases	4	61	1462	22848	0.553628	0.920469	1.02478	A0A6P7DH09:JEQ12_013007,A0A8V6WJ47:NDUFS5,A0A836D7I1:JEQ12_010126,A0A836D9E9:JEQ12_010128
oas05203	Human Diseases	Cancer: overview	Viral carcinogenesis	2	61	692	22848	0.55527	0.920469	1.08254	Q4LBE4:ovar-MHCI-E2,R9WDM9:OLA-I
oas04933	Human Diseases	Endocrine and metabolic disease	AGE-RAGE signaling pathway in diabetic complications	1	61	306	22848	0.561139	0.920469	1.22404	A0A836D5E3:JEQ12_009437
oas05132	Human Diseases	Infectious disease: bacterial	Salmonella infection	2	61	703	22848	0.563913	0.920469	1.0656	Q28539:,A0A836CYL9:JEQ12_002056
oas05415	Human Diseases	Cardiovascular disease	Diabetic cardiomyopathy	3	61	1103	22848	0.569952	0.920469	1.01874	A0A836D5E3:JEQ12_009437,A0A6P7DH09:JEQ12_013007,A0A8V6WJ47:NDUFS5
oas05167	Human Diseases	Infectious disease: viral	Kaposi sarcoma-associated herpesvirus infection	2	61	722	22848	0.578565	0.920469	1.03756	Q4LBE4:ovar-MHCI-E2,R9WDM9:OLA-I
oas05208	Human Diseases	Cancer: overview	Chemical carcinogenesis - reactive oxygen species	3	61	1117	22848	0.578651	0.920469	1.00597	A0A6P7DH09:JEQ12_013007,A0A8V6WJ47:NDUFS5,W5PMM4:LOC106990122
oas04350	Environmental Information Processing	Signal transduction	TGF-beta signaling pathway	1	61	324	22848	0.582039	0.920469	1.15604	W5Q0B5:PPP2R1A
oas04142	Cellular Processes	Transport and catabolism	Lysosome	1	61	330	22848	0.588785	0.920469	1.13502	A0A835ZW35:JEQ12_010486
oas04926	Organismal Systems	Endocrine system	Relaxin signaling pathway	1	61	339	22848	0.598705	0.920469	1.10489	A0A836D5E3:JEQ12_009437
oas04270	Organismal Systems	Circulatory system	Vascular smooth muscle contraction	1	61	343	22848	0.603038	0.920469	1.092	A0A836A333:JEQ12_018353
oas05146	Human Diseases	Infectious disease: parasitic	Amoebiasis	1	61	343	22848	0.603038	0.920469	1.092	A0A836D5E3:JEQ12_009437
oas04919	Organismal Systems	Endocrine system	Thyroid hormone signaling pathway	1	61	345	22848	0.605187	0.920469	1.08567	Q28539:
oas05163	Human Diseases	Infectious disease: viral	Human cytomegalovirus infection	2	61	765	22848	0.610417	0.920469	0.979235	Q4LBE4:ovar-MHCI-E2,R9WDM9:OLA-I
oas05170	Human Diseases	Infectious disease: viral	Human immunodeficiency virus 1 infection	2	61	789	22848	0.627405	0.920469	0.949448	Q4LBE4:ovar-MHCI-E2,R9WDM9:OLA-I
oas04210	Cellular Processes	Cell growth and death	Apoptosis	1	61	382	22848	0.642942	0.920469	0.980517	Q28539:
oas05017	Human Diseases	Neurodegenerative disease	Spinocerebellar ataxia	1	61	382	22848	0.642942	0.920469	0.980517	A0A6P7DH09:JEQ12_013007
oas05034	Human Diseases	Substance dependence	Alcoholism	1	61	382	22848	0.642942	0.920469	0.980517	A0A6P3EIS0:JEQ12_002837
oas04261	Organismal Systems	Circulatory system	Adrenergic signaling in cardiomyocytes	1	61	384	22848	0.644878	0.920469	0.97541	W5Q0B5:PPP2R1A
oas04140	Cellular Processes	Transport and catabolism	Autophagy - animal	1	61	385	22848	0.645843	0.920469	0.972876	A0A6P7DBI6:JEQ12_011794
oas03040	Genetic Information Processing	Transcription	Spliceosome	1	61	386	22848	0.646804	0.920469	0.970356	A0A836AEL5:JEQ12_010101
oas04910	Organismal Systems	Endocrine system	Insulin signaling pathway	1	61	391	22848	0.651575	0.920469	0.957947	W5P7U3:SORBS1
oas04921	Organismal Systems	Endocrine system	Oxytocin signaling pathway	1	61	393	22848	0.653465	0.920469	0.953072	Q28539:
oas04932	Human Diseases	Endocrine and metabolic disease	Non-alcoholic fatty liver disease (NAFLD)	2	61	828	22848	0.653805	0.920469	0.904728	A0A8V6WJ47:NDUFS5,A0A6P7EIU7:JEQ12_002732
oas04145	Cellular Processes	Transport and catabolism	Phagosome	4	61	1657	22848	0.654315	0.920469	0.904182	Q28539:,Q4LBE4:ovar-MHCI-E2,R9WDM9:OLA-I,A0A835ZN47:JEQ12_013186
oas04915	Organismal Systems	Endocrine system	Estrogen signaling pathway	1	61	396	22848	0.656282	0.920469	0.945852	B0LKP1:KRT35
oas04216	Cellular Processes	Cell growth and death	Ferroptosis	1	61	400	22848	0.660002	0.920469	0.936393	A0A6P3E0G2:JEQ12_001713
oas05135	Human Diseases	Infectious disease: bacterial	Yersinia infection	1	61	415	22848	0.673604	0.920469	0.902548	Q28539:
oas04150	Environmental Information Processing	Signal transduction	mTOR signaling pathway	1	61	425	22848	0.682374	0.920469	0.881311	A0A835ZR38:JEQ12_011959
oas05150	Human Diseases	Infectious disease: bacterial	Staphylococcus aureus infection	3	61	1304	22848	0.684181	0.920469	0.861712	B0LKP1:KRT35,A0A836D7I1:JEQ12_010126,A0A836D9E9:JEQ12_010128
oas04152	Environmental Information Processing	Signal transduction	AMPK signaling pathway	1	61	441	22848	0.695925	0.920469	0.849336	W5Q0B5:PPP2R1A
oas04310	Environmental Information Processing	Signal transduction	Wnt signaling pathway	1	61	441	22848	0.695925	0.920469	0.849336	A0A836CTF0:JEQ12_007985
oas05160	Human Diseases	Infectious disease: viral	Hepatitis C	1	61	446	22848	0.700042	0.920469	0.839815	W5Q0B5:PPP2R1A
oas04022	Environmental Information Processing	Signal transduction	cGMP-PKG signaling pathway	1	61	454	22848	0.706515	0.920469	0.825016	A0A6P7DH09:JEQ12_013007
oas04621	Organismal Systems	Immune system	NOD-like receptor signaling pathway	1	61	469	22848	0.718284	0.920469	0.79863	A0A836CZD4:JEQ12_003009
oas04217	Cellular Processes	Cell growth and death	Necroptosis	1	61	474	22848	0.722103	0.920469	0.790205	A0A6P3EKY4:JEQ12_004914
oas04723	Organismal Systems	Nervous system	Retrograde endocannabinoid signaling	1	61	481	22848	0.727364	0.920469	0.778706	A0A8V6WJ47:NDUFS5
oas05416	Human Diseases	Cardiovascular disease	Viral myocarditis	3	61	1398	22848	0.729483	0.920469	0.803771	Q28539:,Q4LBE4:ovar-MHCI-E2,R9WDM9:OLA-I
oas04612	Organismal Systems	Immune system	Antigen processing and presentation	3	61	1415	22848	0.737125	0.920469	0.794115	Q4LBE4:ovar-MHCI-E2,R9WDM9:OLA-I,A0A6P3EDG0:JEQ12_016039
oas05225	Human Diseases	Cancer: specific types	Hepatocellular carcinoma	1	61	495	22848	0.737594	0.920469	0.756682	Q28539:
oas05202	Human Diseases	Cancer: overview	Transcriptional misregulation in cancer	1	61	519	22848	0.75426	0.933551	0.721691	W5P343:AFF1
oas05207	Human Diseases	Cancer: overview	Chemical carcinogenesis - receptor activation	1	61	548	22848	0.773013	0.948984	0.683499	A0A836CYL9:JEQ12_002056
oas05022	Human Diseases	Neurodegenerative disease	Pathways of neurodegeneration - multiple diseases	4	61	2003	22848	0.793762	0.962071	0.747993	A0A6P7DH09:JEQ12_013007,W5P2D4:NEFH,A0A8V6WJ47:NDUFS5,A0A6P7E783:JEQ12_000335
oas05171	Human Diseases	Infectious disease: viral	Coronavirus disease - COVID-19	2	61	1106	22848	0.801496	0.962071	0.677319	A0A836D7I1:JEQ12_010126,A0A836D9E9:JEQ12_010128
oas04810	Cellular Processes	Cell motility	Regulation of actin cytoskeleton	1	61	600	22848	0.80318	0.962071	0.624262	Q28539:
oas04514	Environmental Information Processing	Signaling molecules and interaction	Cell adhesion molecules (CAMs)	3	61	1598	22848	0.809159	0.962071	0.703174	Q4LBE4:ovar-MHCI-E2,R9WDM9:OLA-I,W5QBU1:NTNG1
oas04714	Organismal Systems	Environmental adaptation	Thermogenesis	2	61	1168	22848	0.825816	0.965146	0.641365	Q28539:,A0A8V6WJ47:NDUFS5
oas04014	Environmental Information Processing	Signal transduction	Ras signaling pathway	1	61	646	22848	0.826554	0.965146	0.57981	A0A835ZV86:JEQ12_003518
oas05205	Human Diseases	Cancer: overview	Proteoglycans in cancer	1	61	668	22848	0.836746	0.965146	0.560715	Q28539:
oas05012	Human Diseases	Neurodegenerative disease	Parkinson disease	2	61	1200	22848	0.837312	0.965146	0.624262	A0A6P7DH09:JEQ12_013007,A0A8V6WJ47:NDUFS5
oas04020	Environmental Information Processing	Signal transduction	Calcium signaling pathway	1	61	689	22848	0.845923	0.967685	0.543625	A0A6P7DH09:JEQ12_013007
oas05169	Human Diseases	Infectious disease: viral	Epstein-Barr virus infection	3	61	1757	22848	0.857818	0.971698	0.63954	Q4LBE4:ovar-MHCI-E2,R9WDM9:OLA-I,A0A6P3EEU1:JEQ12_010401
oas05322	Human Diseases	Immune disease	Systemic lupus erythematosus	2	61	1330	22848	0.877389	0.971698	0.563244	A0A836D7I1:JEQ12_010126,A0A836D9E9:JEQ12_010128
oas05332	Human Diseases	Immune disease	Graft-versus-host disease	2	61	1358	22848	0.884759	0.971698	0.551631	Q4LBE4:ovar-MHCI-E2,R9WDM9:OLA-I
oas04940	Human Diseases	Endocrine and metabolic disease	Type I diabetes mellitus	2	61	1363	22848	0.886032	0.971698	0.549607	Q4LBE4:ovar-MHCI-E2,R9WDM9:OLA-I
oas05330	Human Diseases	Immune disease	Allograft rejection	2	61	1363	22848	0.886032	0.971698	0.549607	Q4LBE4:ovar-MHCI-E2,R9WDM9:OLA-I
oas05320	Human Diseases	Immune disease	Autoimmune thyroid disease	2	61	1371	22848	0.888042	0.971698	0.5464	Q4LBE4:ovar-MHCI-E2,R9WDM9:OLA-I
oas00190	Metabolism	Energy metabolism	Oxidative phosphorylation	1	61	866	22848	0.905597	0.983778	0.432514	A0A8V6WJ47:NDUFS5
oas05164	Human Diseases	Infectious disease: viral	Influenza A	2	61	1519	22848	0.919858	0.987865	0.493163	Q28539:,Q9XSM2:
oas05010	Human Diseases	Neurodegenerative disease	Alzheimer disease	2	61	1536	22848	0.922923	0.987865	0.487705	A0A6P7DH09:JEQ12_013007,A0A8V6WJ47:NDUFS5
oas04060	Environmental Information Processing	Signaling molecules and interaction	Cytokine-cytokine receptor interaction	1	61	1125	22848	0.954232	0.987865	0.33294	A0A835ZSK1:JEQ12_013054
oas05166	Human Diseases	Infectious disease: viral	Human T-cell leukemia virus 1 infection	2	61	1824	22848	0.960851	0.987865	0.410699	Q4LBE4:ovar-MHCI-E2,R9WDM9:OLA-I
oas04151	Environmental Information Processing	Signal transduction	PI3K-Akt signaling pathway	1	61	1246	22848	0.967463	0.987865	0.300608	W5Q0B5:PPP2R1A
oas04658	Organismal Systems	Immune system	Th1 and Th2 cell differentiation	1	61	1297	22848	0.971837	0.987865	0.288787	A0A6P3EEU1:JEQ12_010401
oas05140	Human Diseases	Infectious disease: parasitic	Leishmaniasis	1	61	1319	22848	0.973541	0.987865	0.283971	A0A836D8Q5:JEQ12_001386
oas04659	Organismal Systems	Immune system	Th17 cell differentiation	1	61	1363	22848	0.976649	0.987865	0.274804	A0A6P3EEU1:JEQ12_010401
oas05145	Human Diseases	Infectious disease: parasitic	Toxoplasmosis	1	61	1385	22848	0.978066	0.987865	0.270439	A0A6P7DH09:JEQ12_013007
oas05168	Human Diseases	Infectious disease: viral	Herpes simplex virus 1 infection	2	61	2076	22848	0.978861	0.987865	0.360845	Q4LBE4:ovar-MHCI-E2,R9WDM9:OLA-I
oas05152	Human Diseases	Infectious disease: bacterial	Tuberculosis	1	61	1589	22848	0.98776	0.987865	0.235719	A0A6P3EDG0:JEQ12_016039
oas05200	Human Diseases	Cancer: overview	Pathways in cancer	1	61	1592	22848	0.987865	0.987865	0.235275	A0A835ZV86:JEQ12_003518
