# Supplementary material for: Proteome Analysis of Alpine Merino Sheep Skin Reveals New Insights into the Mechanisms Involved in Regulating Wool Fiber Diameter
Source: Int J Mol Sci. 2023 Oct 16;24(20):15227. doi: 10.3390/ijms242015227 (PMC10607505; doi:10.3390/ijms242015227)
Supplement: Supplementary file 1 [file ijms-24-15227-s001.zip › Supplementary Table S5.xlsx]

## Sheet: Sheet1
Protein	cluster
W5P5F7	1
A0A835ZXX7	1
W5PB29	1
A0A836A1E8	1
A0A6P3YPE9	1
A0A836AH65	1
A0A6P7DH09	1
A0A836ACM1	1
A0A835ZYY8	1
A0A6P3E0G2	1
A0A6P3T904	1
A0A6P7DDH3	1
A0A836AIB7	1
A0A836A333	1
A0A835ZKJ6	1
R9WDM9	1
A0A836AAA0	1
W5Q664	1
A0A6P3E915	1
A0A836D2B5	1
A0A835ZMX0	1
A0A6P7D8F4	1
W5P743	1
A0A6P3EF19	1
A0A6P7E255	1
A0A6P7EKL0	1
W5PEF0	1
A0A836D4F8	1
A0A835ZN47	1
A0A6P7DHP6	1
W5P2D4	1
A0A836CRH8	1
W5PPH9	1
A0A6P3E4E9	1
A0A836A317	1
W5PPL6	1
A0A835ZW00	1
A0A6P7EDK3	1
A0A836AHH5	1
A0A836A6M7	1
A0A836D8Q5	1
A0A836AIJ9	1
W5P080	1
W5NTH3	1
A0A6P7DY91	1
W5PP11	1
A0A836APZ2	1
A0A6P3EIS0	1
Q4LBE4	1
A0A835ZSK1	1
A0A836D7I7	1
A0A6P3EAD1	1
A0A836CVD7	1
W5P343	1
A0A836CS21	1
A0A836AES4	1
A0A836D9Q2	1
A0A835ZK84	1
A0A836CX48	1
W5QFP3	1
A0A835ZY26	1
A0A6P3TDT5	1
A0A6P3EMM5	1
A0A6P7EI32	1
W5P3T9	1
A0A6P7EF70	1
A0A836AKD8	1
A0A835ZUP5	1
A0A835ZX90	1
A0A6P7DAB0	1
W5NRM9	1
A0A836AH91	1
A0A6P3YJ96	1
A0A6P3E7I7	1
A0A6P3E3E9	1
Q28539	1
A0A6P3YIR2	1
A0A836A7W9	1
A0A836A9Q9	1
A0A836AIM8	1
W5QI14	1
W5Q287	1
A0A836A510	1
A0A8K1EPA0	2
W5NZH3	2
A0A836D6N7	2
A0A836AAQ6	2
A0A6P3ECZ1	2
A0A836AHX6	2
A0A836DAF4	2
A0A836D1R7	2
A0A6P3EBE2	2
A0A836A820	2
A0A6P7D0Q3	2
I6VNY9	2
A0A836D2R0	2
A0A836D5Y1	2
A0A836AFA6	2
A0A6P3YJI1	2
A0A6P3TMF1	2
A0A836CS27	2
A0A836CTY7	2
A0A6P7DEH4	2
A0A836A0Q8	2
W5NZA9	2
A0A836AKA5	2
A0A6P7DBI6	2
W5Q9T5	2
A0A6P3YMN6	2
A0A836D626	2
A0A836CY36	2
A0A836A554	2
W5QA03	2
A0A6P3E9P9	2
A0A6P3EK71	2
A0A6P3E1G5	2
W5P9U5	2
A0A836D8K5	2
A0A835ZX46	2
A0A836D206	2
P79360	2
A0A6P3EEW7	2
A0A836D233	2
A0A836A8K7	2
W5PVY4	2
A0A836A900	2
W5QEF2	2
Q95LG2	2
A0A836AFP3	2
W5Q2U8	2
W5QBU1	2
A0A6P3TRY4	2
A0A836D465	2
W5PKQ1	2
C5IJ93	2
A0A6P7DBH2	2
A0A6P3E6W2	2
A0A6P3EGG0	2
A0A6P3EGW4	2
A0A6P7DI25	2
W5NSS0	2
A0A835ZYG6	2
A0A836APW2	2
A0A6P3E6K7	2
W5PJD9	2
A0A6P7D643	2
W5PCV9	2
W5PI20	2
W5P8R7	2
A0A836CYW8	2
A0A835ZY77	2
A0A836CYS4	2
A0A6P3E814	2
W5Q2X5	2
A0A6P3E1E5	2
W5PQ36	2
A0A836ABD9	2
W5P0B1	2
A0A836AG96	2
A0A836A6B1	2
A0A836A4S5	2
A0A835ZIZ3	2
A0A6P3YRZ5	2
A0A836A0A1	2
W5PI62	2
A0A836D7P1	2
A0A836A9P7	2
A0A835ZQ27	2
W5Q030	2
A0A6P3TJP9	2
A0A836A6R9	2
A0A836AFK7	2
W5QDE8	2
A0A836AAB4	2
W5NUY0	2
A0A835ZTK5	2
A0A836ACQ8	2
A0A2P9DU16	2
A0A835ZNI9	2
A0A835ZST8	2
A0A836AGX7	2
A0A836D4E0	2
A0A836D6T4	2
A0A835ZT53	2
A0A6P7E4M1	2
A0A835ZQK8	2
A0A6P3YPC8	2
W5PHI7	2
A0A6P7E781	2
A0A836A7T4	2
A0A6P7DSV8	2
A0A835ZW76	2
A0A6P7D3C7	2
A0A835ZWJ1	2
A0A6P3EGP8	2
A0A835ZV73	2
A0A0F7YC43	2
A0A836ALE8	2
A0A6P3ED94	2
A0A835ZRW4	2
A0A836A046	2
A0A6P3E9W7	2
A0A836CSU4	2
P52210	2
A0A836AE62	2
A0A836AA67	2
A0A6P3EFS8	2
A0A836D4N1	2
A0A835ZMH6	2
A0A3G0YYZ8	2
A0A6P3E7I1	2
A0A7S9XD72	2
W5NPH3	2
A0A836A9L9	2
A0A836AP87	2
A0A836CTN1	2
A0A6P7DTX0	2
A0A6P7DS61	2
A0A6P7DWV4	2
A0A836CXE7	2
A0A836ALJ4	2
A0A6P7D1L7	2
W5PCL0	2
A0A835ZWC9	2
A0A836CXZ2	2
A0A835ZXI9	2
A0A6P3E1K1	2
A0A6P7DH35	2
A0A6P3EN77	2
A0A6P3E932	2
Q307E7	2
A0A835ZWR8	2
A0A6P7EM57	2
A0A835ZLA2	2
A0A836CZG4	2
A0A836D4Q4	2
A0A836CXV0	2
A0A6P3YJY3	2
W5Q406	2
A0A836D8U8	2
A0A6P3TGE4	2
A0A6P3YP06	2
A8IW66	2
A0A1Z1GF81	2
A0A6P3EB59	2
A0A836A4Z2	2
A0A836AHM3	2
W5QH94	2
A0A836A0D7	2
W5Q2Y2	2
A0A836CZW9	2
W5PK85	2
I6WH56	2
A0A6P3E2X9	2
A0A836AA97	2
W5PZL5	2
A0A6P3E7M5	2
A0A835ZXR4	2
A0A835ZTN7	2
W5P7I0	2
A0A6P7D9I4	2
W5PJA4	2
A0A836A5W6	2
A0A836D2Z7	2
A0A6P7DTJ3	2
A0A6P3E216	2
W5PVQ8	2
A0A6P3T630	2
A0A6P3EE85	2
A0A836D611	2
A0A6P3TIW1	2
O19031	2
W5NRP8	2
A0A836A667	2
A0A6P3ELN5	2
A0A836AKQ5	2
A0A836AML4	2
A0A835ZU78	2
A0A836CWY9	2
A0A6P7DQB6	2
A0A835ZTW1	2
A0A6P7DXT0	2
A0A836AN55	2
A0A836D7F4	2
A0A835ZVP3	2
A0A836AD74	2
A0A835ZXC6	2
A0A6P3T738	2
W5PT89	2
A0A6P3E145	2
A0A6P7EWU8	2
A0A836CXP9	2
A0A836AMH6	2
W5QIC7	3
W5QIW0	3
A0A836CRZ6	3
A0A6P3EDG1	3
A0A835ZRZ4	3
A0A6P3TEW9	3
A0A6P7DAL9	3
A0A836AB62	3
A0A6P3CWW8	3
A0A836A271	3
W5Q983	3
A0A836AJY5	3
A0A836A0Y3	3
A0A836ADC2	3
A0A835ZWU4	3
A0A836AIQ7	3
W5QIV5	3
B0LKP2	3
A0A6P3E3L2	3
A0A6P3EE45	3
A0A836A896	3
A0A836D1P4	3
A0A6P7EIU7	3
A0A6P3TN32	3
A0A835ZVP1	3
A0A835ZY74	3
A0A836D5A1	3
A0A6P3EJ78	3
A0A6P3TDD4	3
A0A836CSS2	3
A0A6P7EME8	3
A0A836A1U6	3
A0A836CSQ6	3
A0A6P7DZS1	3
A0A6P7EHF0	3
A0A6P7EG36	3
W5Q0V6	3
W5P9X6	3
W5PEP4	3
A0A835ZWK7	3
A0A836D9Y5	3
W5P3A4	3
A0A836D766	3
A0A6P3ED31	3
A0A836CTD8	3
A0A835ZLH3	3
W5Q209	3
A0A836A2J9	3
A0A6P3EGY6	3
A0A6P7EWH0	3
A0A6P3E4D8	3
W5PFX1	3
A0A835ZYX0	3
W5PXC5	3
A0A835ZWG9	3
A0A6P3E7T0	3
A0A6P7EUL0	3
A0A836AIR9	3
A0A835ZMS8	3
W5PLH3	3
A0A6P7E4N6	3
A0A377TEY1	3
A0A6P3CXU7	3
A0A835ZZ77	3
W5QFM3	3
A0A6P3TBK2	3
A0A6P3EF08	3
A0A6P7EKL1	3
A0A6P3E4F9	3
A0A6P7DF14	3
A0A836A039	3
A0A6P7ECZ1	3
A0A6P3YEN2	3
W5Q702	3
A0A836AGH6	3
A0A836A9M6	3
A0A6P3E7B5	3
A0A835ZSN8	3
A0A836AA19	3
W5PT76	3
A0A836CW52	3
A0A6P7D7F7	3
A0A835ZPD9	3
A0A836CW49	3
A0A6P3EAP7	3
A0A835ZW07	3
W5PQK0	3
A0A6P7DJX2	3
A0A835ZPE6	3
A0A6P7DJM9	3
W5PNT5	3
A0A836A8S0	3
W5P3D9	3
W5NSS2	3
A0A835ZWY9	3
A0A6P3E3J6	3
A0A836A2E5	3
A0A836CWL4	3
A0A836D5R9	3
A0A6P3T242	3
A0A836D6D9	3
A0A835ZL33	3
A0A6P7EJN4	3
A0A836D7Z2	3
W5Q8S1	3
A0A835ZMH1	3
W5QDS3	3
A0A6P7D3P0	3
A0A836AJB7	3
A0A836D8L1	3
A0A836DA33	3
W5Q902	3
W5Q756	3
A0A836CWX6	3
A0A6P3YKA6	3
A0A6P3E1W3	3
A0A836A5X2	3
W5NTW3	3
W5NT57	3
A0A6P3TNQ3	3
A0A836AML3	3
A0A836AI10	3
A0A6P7EU40	3
A0A6P3TJ94	3
A0A836A845	3
A0A836A1M9	3
A0A836ANL3	3
A0A6P7DEC9	3
W5PAZ7	3
A0A835ZY35	3
W5Q663	3
A0A6P7E366	3
A0A6P3YMV8	3
A0A6P3ECM2	3
W5PRB8	3
A0A835ZZP8	3
A0A835ZV84	3
A0A835ZL45	3
W5PV98	3
A0A835ZUS4	3
W5PAD2	3
W5PP29	3
A0A836D7B8	3
W5NWU7	3
A0A6P3EMZ6	3
A0A836ABN9	3
A0A836CZD4	3
W5PET9	3
A0A6P3EDG0	4
A0A6P3E780	4
A0A6P7EBT6	4
A0A836CT77	4
W5P7U3	4
A0A835ZZX2	4
W5PZD3	4
A0A836CUK5	4
A0A836AHZ6	4
W5QEF0	4
A0A836CZG6	4
A0A6P3TJN6	4
A0A836AJL8	4
A0A6P3E895	4
A0A836CU99	4
W5PEW4	4
A0A6P7E0V3	4
A0A836AG62	4
A0A836D7R2	4
A0A836AEU3	4
A0A6P3EI01	4
A0A836AIL0	4
A0A6P7E0G1	4
A0A836AQL3	4
A0A836CXW9	4
A0A835ZYR2	4
W5PGH4	4
A0A836D7I1	4
A0A836D9E9	4
A0A836A0E6	4
A0A836CWG2	4
A0A835ZL52	4
A0A6P3DZ22	4
W5NY46	4
W5PZH6	4
A0A836ACV6	4
B0LKP1	4
A0A6P3E7K8	4
A0A6P3DYJ8	4
A0A836CV65	4
A0A8V6WJ47	4
A0A836A0K4	4
W5NRU6	4
A0A836CYL9	4
A0A6P3E217	4
A0A836CTK1	4
A0A6P7DNV9	4
A0A836A025	4
W5PMM4	4
W5P6V2	4
A0A836CZI8	4
A0A6P3ENR6	4
A0A6P3TNJ8	4
A0A835ZQJ3	4
W5PZH4	4
A0A836A2J5	4
Q9XSM2	4
A0A836AJR1	4
A0A6P3E4F6	4
A0A835ZR38	4
A0A6P3TQB2	4
A0A6P7E783	4
A0A836CXT9	4
A0A836D5E3	4
A0A836AEL5	4
F8T894	4
W5QH50	4
A0A1W6S9X2	4
A0A6P7EUH5	4
A0A6P3T6A0	4
A0A836AHD4	4
A0A835ZV86	4
W5Q0B5	4
A0A6P3EDJ4	4
A0A6P3EK75	4
A0A836CR68	4
A0A835ZKR9	4
A0A836A6H3	4
A0A836A210	4
A0A836CTF0	4
W5QBU0	4
A0A6P3EKY4	4
W5NSR4	4
A0A835ZLT0	4
A0A6P3EEU1	4
W5NRJ2	4
W5PRW5	4
W5Q9A2	4
A0A6P7EIU6	4
A0A6P7EKR8	4
W5Q9B2	4
A0A836D6X4	4
A0A836CWK4	4
A0A836CSU1	4
A0A835ZMU2	4
A0A836AEG4	4
A0A836AFC9	4
A0A6P7EQH6	4
A0A836D765	4
W5Q6R7	4
A0A835ZW35	4
A0A836A809	4
A0A835ZV61	4
A0A836A1U5	4
A0A835ZLG6	4
A0A836D4L7	4
A0A0H5FU01	4
A0A836A9D3	4
A0A835ZMT1	4
A0A6P3E402	4
A0A6P3E4P6	4
A0A836CZL5	4
W5PLD3	4
A0A835ZKU9	4
A0A6P7E4M9	4
A0A1Y5U0U0	4
A0A836AHQ9	4
A0A6P3E392	4
A0A6P3EAU7	4
A0A836CTH6	4
W5PN58	4
W5Q7Z8	4
A0A836CUK4	4
A0A835ZT30	4
W5P276	4
W5PRU0	4
A0A835ZRC9	4
A0A836CYW7	4
W5PDV0	4
W5NXI6	4
W5PUL9	4
W5PY63	4
A0A6P3YHD7	4
A0A6P3YJP1	4
A0A835ZWT5	4
A0A836D082	4
A0A836AF56	4
A0A835ZL68	4
A0A836CU25	4
A0A836D748	4
A0A6P3TUJ5	4
W5PTA9	4
A0A6P7EDF3	4

## Sheet: cluster1
Category	Term	Count	PValue	Protein	List Total	Pop Hits	Pop Total	Fold Enrichment	Bonferroni	Benjamini	FDR
GOTERM_BP_DIRECT	GO:0051457~maintenance of protein location in nucleus	2	0.0312498	A0A836D4F8, A0A6P7D8F4	36	12	13252	61.3519	0.979211	1	1
GOTERM_BP_DIRECT	GO:0032012~regulation of ARF protein signal transduction	2	0.0439886	ARFGEF3,ARFGEF2	36	17	13252	43.3072	0.995865	1	1
GOTERM_MF_DIRECT	GO:0043022~ribosome binding	2	0.0701125	W5PPH9, A0A6P3EAD1	26	43	14822	26.5152	0.980265	1	1

## Sheet: cluster2
Category	Term	Count	PValue	Protein	List Total	Pop Hits	Pop Total	Fold Enrichment	Bonferroni	Benjamini	FDR
GOTERM_BP_DIRECT	GO:0007155~cell adhesion	5	0.0065343	W5PCV9, W5PVY4, A0A6P3E7M5, A0A6P3ED94, Q95LG2	70	143	13252	6.61938	0.836245	1	1
GOTERM_BP_DIRECT	GO:0008360~regulation of cell shape	3	0.062302	A0A6P7DS61, W5PVQ8, W5Q2Y2	70	78	13252	7.28132	1	1	1
GOTERM_CC_DIRECT	GO:0031012~extracellular matrix	3	0.0477206	A0A6P7DTX0, A0A6P3ED94, A0A836D626	78	73	16097	8.48103	0.992099	1	1
GOTERM_CC_DIRECT	GO:0032040~small-subunit processome	2	0.0649515	A0A6P3EBE2	78	14	16097	29.4817	0.998704	1	1
GOTERM_MF_DIRECT	GO:0005509~calcium ion binding	11	0.000732898	A0A6P3YMN6, W5Q9T5, A0A6P7D1L7, W5PZL5, A0A6P7DS61, A0A6P3E6W2, A0A6P7DXT0, A0A6P7E4M1, A0A836D626, A0A6P7DSV8, Q95LG2	75	597	14822	3.64136	0.0962269	0.10114	0.10114
GOTERM_MF_DIRECT	GO:0004571~mannosyl-oligosaccharide 1,2-alpha-mannosidase activity	2	0.0440579	A0A6P3YMN6, A0A6P7DSV8	75	9	14822	43.917	0.998007	1	1

## Sheet: cluster3
Category	Term	Count	PValue	Protein	List Total	Pop Hits	Pop Total	Fold Enrichment	Bonferroni	Benjamini	FDR
GOTERM_BP_DIRECT	GO:0070417~cellular response to cold	3	0.00129224	A0A835ZV84, A0A6P3CWW8, A0A836A271	61	12	13252	54.3115	0.237799	0.27137	0.27137
GOTERM_BP_DIRECT	GO:0046622~positive regulation of organ growth	2	0.0400302	W5QIC7, A0A6P7DJM9	61	9	13252	48.2769	0.999812	1	1
GOTERM_BP_DIRECT	GO:0006672~ceramide metabolic process	2	0.0530201	A0A6P3ECM2, A0A6P3EDG1	61	12	13252	36.2077	0.999989	1	1
GOTERM_CC_DIRECT	GO:0005882~intermediate filament	4	0.00171746	W5Q702, B0LKP2, W5Q0V6, W5Q209	68	57	16097	16.612	0.120956	0.12881	0.12881
GOTERM_CC_DIRECT	GO:0005789~endoplasmic reticulum membrane	7	0.00616781	A0A835ZZP8, W5PRB8, A0A6P3EMZ6, A0A6P3EDG1, A0A6P7E366, A0A6P3EGY6, A0A6P3YMV8	68	398	16097	4.16343	0.371248	0.231293	0.231293
GOTERM_CC_DIRECT	GO:0005811~lipid particle	3	0.021994	A0A835ZV84, A0A6P3CWW8, A0A836A271	68	55	16097	12.912	0.811369	0.492361	0.492361
GOTERM_CC_DIRECT	GO:0016607~nuclear speck	5	0.0292191	W5P9X6, W5QDS3, W5PAD2, A0A6P3TJ94, A0A6P3TEW9	68	280	16097	4.22715	0.891834	0.492361	0.492361
GOTERM_CC_DIRECT	GO:0036396~MIS complex	2	0.0328241	W5P9X6, W5QDS3	68	8	16097	59.1801	0.91817	0.492361	0.492361
GOTERM_CC_DIRECT	GO:0070847~core mediator complex	2	0.0488358	A0A6P3ED31, A0A6P3E7T0	68	12	16097	39.4534	0.976603	0.610448	0.610448
GOTERM_MF_DIRECT	GO:0016747~transferase activity, transferring acyl groups other than amino-acyl groups	3	0.00299338	A0A835ZZP8, W5PRB8, A0A6P3EMZ6	65	19	14822	36.0049	0.272233	0.317298	0.317298
GOTERM_MF_DIRECT	GO:0042803~protein homodimerization activity	7	0.0139366	A0A835ZV84, A0A6P7DF14, A0A6P7EIU7, A0A6P3T242, W5Q983, W5PFX1, W5PET9	65	458	14822	3.48519	0.774103	0.671412	0.671412
GOTERM_MF_DIRECT	GO:0005198~structural molecule activity	4	0.0190022	B0LKP2, W5QIW0, W5Q0V6, W5Q209	65	131	14822	6.96277	0.869139	0.671412	0.671412
GOTERM_MF_DIRECT	GO:0000977~RNA polymerase II regulatory region sequence-specific DNA binding	3	0.0634381	W5P3A4, A0A6P7EIU7, W5QIC7	65	95	14822	7.20097	0.999039	1	1

## Sheet: cluster4
Category	Term	Count	PValue	Protein	List Total	Pop Hits	Pop Total	Fold Enrichment	Bonferroni	Benjamini	FDR
GOTERM_BP_DIRECT	GO:0030193~regulation of blood coagulation	2	0.0242059	W5QH50, A0A836D765	55	6	13252	80.3152	0.997067	1	1
GOTERM_BP_DIRECT	GO:0048490~anterograde synaptic vesicle transport	2	0.0478365	A0A6P3TNJ8, W5NRJ2	55	12	13252	40.1576	0.999991	1	1
GOTERM_BP_DIRECT	GO:0030168~platelet activation	2	0.0897094	W5QH50, A0A6P3TNJ8	55	23	13252	20.9518	1	1	1
GOTERM_BP_DIRECT	GO:0008333~endosome to lysosome transport	2	0.0934251	A0A6P7EBT6, W5NRJ2	55	24	13252	20.0788	1	1	1
GOTERM_CC_DIRECT	GO:0005833~hemoglobin complex	2	0.0452683	W5PN58, A0A835ZT30	63	12	16097	42.5847	0.96755	1	1
GOTERM_CC_DIRECT	GO:0031083~BLOC-1 complex	2	0.0526144	A0A6P3TNJ8, W5NRJ2	63	14	16097	36.5011	0.981678	1	1
GOTERM_CC_DIRECT	GO:0071556~integral component of lumenal side of endoplasmic reticulum membrane	2	0.0743207	A0A0H5FU01	63	20	16097	25.5508	0.996703	1	1
GOTERM_MF_DIRECT	GO:0005344~oxygen transporter activity	2	0.0571419	W5PN58, A0A835ZT30	59	15	14822	33.496	0.997375	1	1
GOTERM_MF_DIRECT	GO:0019825~oxygen binding	2	0.068179	W5PN58, A0A835ZT30	59	18	14822	27.9134	0.999201	1	1
