# Supplementary material for: Proteome Analysis of Alpine Merino Sheep Skin Reveals New Insights into the Mechanisms Involved in Regulating Wool Fiber Diameter
Source: Int J Mol Sci. 2023 Oct 16;24(20):15227. doi: 10.3390/ijms242015227 (PMC10607505; doi:10.3390/ijms242015227)
Supplement: Supplementary file 1 [file ijms-24-15227-s001.zip › Supplementary Table S6.xlsx]

## Sheet: brown
Category	Term	Count	PValue	Proteins	List Total	Pop Hits	Pop Total	Fold Enrichment	Bonferroni	Benjamini	FDR
GOTERM_BP_DIRECT	GO:0070417~cellular response to cold	3	0.000828515	A0A835ZV84, A0A6P3CWW8, A0A836A271	49	12	13252	67.6122	0.154864	0.168189	0.168189
GOTERM_BP_DIRECT	GO:0046622~positive regulation of organ growth	2	0.0321401	YBX3, A0A6P7DJM9	49	9	13252	60.0998	0.998682	1	1
GOTERM_BP_DIRECT	GO:0045292~mRNA cis splicing, via spliceosome	2	0.042627	W5PAD2, W5PTA9	49	12	13252	45.0748	0.999856	1	1
GOTERM_BP_DIRECT	GO:0002639~positive regulation of immunoglobulin production	2	0.042627	A0A836A6M7, A0A6P7DJM9	49	12	13252	45.0748	0.999856	1	1
GOTERM_BP_DIRECT	GO:0006672~ceramide metabolic process	2	0.042627	A0A6P3ECM2, A0A6P3EDG1	49	12	13252	45.0748	0.999856	1	1
Category	Term	Count	PValue	Proteins	List Total	Pop Hits	Pop Total	Fold Enrichment	Bonferroni	Benjamini	FDR
GOTERM_CC_DIRECT	GO:0005789~endoplasmic reticulum membrane	6	0.00977539	A0A835ZZP8, W5PRB8, A0A6P3EMZ6, A0A6P3EDG1, A0A6P7E366, A0A6P3YMV8	54	398	16097	4.49386	0.477092	0.466296	0.466296
GOTERM_CC_DIRECT	GO:0005811~lipid particle	3	0.0141302	A0A835ZV84, A0A6P3CWW8, A0A836A271	54	55	16097	16.2596	0.609076	0.466296	0.466296
GOTERM_CC_DIRECT	GO:0036396~MIS complex	2	0.0260444	W5P9X6, W5QDS3	54	8	16097	74.5231	0.824779	0.572976	0.572976
GOTERM_CC_DIRECT	GO:0016607~nuclear speck	4	0.064602	W5P9X6, W5QDS3, W5PAD2, A0A6P3TEW9	54	280	16097	4.25847	0.987817	1	1
GOTERM_CC_DIRECT	GO:0005905~clathrin-coated pit	2	0.0972708	A0A6P7D7F7, Q95LG2	54	31	16097	19.2318	0.998834	1	1
Category	Term	Count	PValue	Proteins	List Total	Pop Hits	Pop Total	Fold Enrichment	Bonferroni	Benjamini	FDR
GOTERM_MF_DIRECT	GO:0016747~transferase activity, transferring acyl groups other than amino-acyl groups	3	0.00183843	A0A835ZZP8, W5PRB8, A0A6P3EMZ6	51	19	14822	45.8885	0.169604	0.185681	0.185681
GOTERM_MF_DIRECT	GO:0042803~protein homodimerization activity	7	0.00423366	CIDEA, CRYM, MLX, TPST2, GPD1, GOPC, CAMK2G	51	458	14822	4.4419	0.348519	0.2138	0.2138
GOTERM_MF_DIRECT	GO:0000977~RNA polymerase II regulatory region sequence-specific DNA binding	3	0.0408135	W5P3A4, A0A6P7EIU7, W5QIC7	51	95	14822	9.17771	0.985134	1	1

## Sheet: yellow
Category	Term	Count	PValue	Proteins	List Total	Pop Hits	Pop Total	Fold Enrichment	Bonferroni	Benjamini	FDR
GOTERM_BP_DIRECT	GO:0032012~regulation of ARF protein signal transduction	2	0.0464464	A0A6P7EDK3, W5PP11	38	17	13252	41.0279	0.997729	1	1
Category	Term	Count	PValue	Proteins	List Total	Pop Hits	Pop Total	Fold Enrichment	Bonferroni	Benjamini	FDR
GOTERM_MF_DIRECT	GO:0043022~ribosome binding	2	0.0781963	W5PPH9, A0A6P3EAD1	29	43	14822	23.7723	0.992444	1	1
