# Supplementary figures and images for: Proteome Analysis of Alpine Merino Sheep Skin Reveals New Insights into the Mechanisms Involved in Regulating Wool Fiber Diameter
Source: MDPI journal article supplement (doi:10.3390/ijms242015227), 2023-10-16

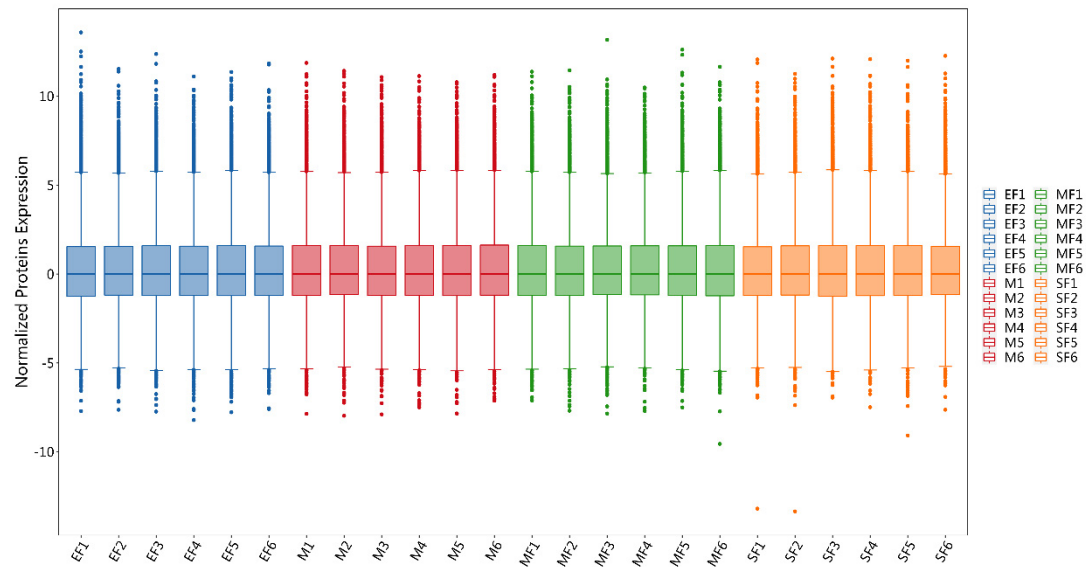

Figure S1. Expression of credible protein

Supplement: s1 [file s1]
